# Supplementary material for: High-resolution DNA methylome analysis of primordial germ cells identifies gender-specific reprogramming in mice
Source: HighWire-hosted journal article supplement (doi:10.1101/gr.148023.112), 2013-02-14
Supplement: TableS1.xlsx [file TableS1.xlsx]

## Sheet: TableS1
Supplementary Table 1. Summary of PBAT mapping of the PGC methylome
Sample	Library name	Run No.	No. of cells	No. of sequenced bases	No. of mapped bases	mC/C ratios			Bisulfite conversion rate	Average depth	CpG cover
						CpG	CpHpG	CpHpH			≥ × 1	≥ × 3	≥ × 5
E10.5mPGC	111115_10.5mPGC	SR × 2	1 × 103	25.9 Gb	11.0 Gb	0.1542	0.0079	0.008	0.99	9.61783	0.923	0.8732	0.7954
	110826_10.5mPGC*	PE × 1	1 × 103	7.2 Gb	2.4 Gb	0.1542	0.0078	0.008	0.991
	110913_10.5mPGC**	PE × 1	1 × 103	14.2 Gb	5.3 Gb	0.2004	0.0072	0.0072	0.989
	110930_10.5mPGC***	PE × 1	1 × 103	15.7 Gb	5.9 Gb	0.1578	0.0084	0.0084	0.991
	Total	SR × 2, PE × 3	4 × 103	63.1 Gb	24.6 Gb	0.169248	0.00705393	0.0070571	0.990087
E10.5fPGC	110602_10.5fPGC	SR × 2	1 × 103	3.9 Gb	1.1 Gb	0.1518	0.0052	0.0054	0.99	9.05056	0.9221	0.8701	0.7861
	110826_10.5fPGC*	PE × 1	1 × 103	8.5 Gb	2.7 Gb	0.1314	0.008	0.0082	0.989
	110913_10.5fPGC**	PE × 1	1 × 103	16.7 Gb	6.2 Gb	0.1685	0.0068	0.0069	0.991
	110930_10.5fPGC***	PE × 1	1 × 103	15.1 Gb	7.9 Gb	0.1471	0.0078	0.0078	0.99
	111115_10.5fPGC	PE × 1	1 × 103	17.9 Gb	5.2 Gb	0.1918	0.0063	0.0064	0.991
	Total	SR × 2, PE × 4	5 × 103	62.0 Gb	23.2 Gb	0.161	0.007	0.007	0.989878
E13.5mPGC	110805_13.5mPGC	SR × 1	1 × 103	9.0 Gb	4.2 Gb	0.0524	0.0064	0.0066	0.991	9.06542	0.9231	0.8712	0.788
	110901_13.5mPGC†	PE × 1	1 × 103	6.5 Gb	2.5 Gb	0.0488	0.0073	0.0073	0.99
	110922_13.5mPGC‡	PE × 3	1 × 103	44.4 Gb	16.5 Gb	0.0322	0.0066	0.0067	0.99
	Total	SR × 1, PE × 4	3 × 103	59.9 Gb	23.2 Gb	0.0376569	0.00666012	0.00673613	0.990638
E13.5fPGC	110506_13.5fPGC	SR × 2	1 × 103	18.2 Gb	7.2 Gb	0.0342	0.0053	0.0054	0.9916	9.2776	0.9244	0.8776	0.7991
	110801_13.5fPGC	SR × 1	1 × 103	7.7 Gb	2.7 Gb	0.0421	0.0064	0.0066	0.992
	110901_13.5fPGC†	PE × 1	1 × 103	8.0 Gb	3.0 Gb	0.0404	0.0076	0.0076	0.9891
	110922_13.5fPGC‡	PE × 2	1 × 103	28.0 Gb	10.8 Gb	0.0268	0.006	0.006	0.9908
	Total	SR × 3, PE × 3	4 × 103	61.8 Gb	23.8 Gb	0.033	0.006	0.006	0.990693
E16.5mPGC	120131_16.5mPGC	SR × 7	2 × 103	59.5 Gb	26.8 Gb	0.3034	0.014	0.0132	0.9929	12.2258	0.922	0.8808	0.8237
	120117_16.5mPGC	PE × 2	1 × 103	24.4 Gb	4.5 Gb	0.357	0.0174	0.0163	0.9924
	Total	SR × 7, PE × 2	3 × 103	83.9 Gb	31.4 Gb	0.317825	0.0148696	0.0139979	0.992585
E16.5fPGC	120118_16.5fPGC	SR × 7	2 × 103	63.8 Gb	23.7 Gb	0.029	0.005	0.005	0.993	9.2484	0.9154	0.8565	0.7684
*110826_10.5mPGC and *110826_10.5fPGC, **110913_10.5mPGC and **110913_10.5fPGC, ***110930_10.5mPGC and ***110930_10.5fPGC, †110901_13.5mPGC and †110901_13.5fPGC, and ‡110922_13.5mPGC and ‡110922_13.5fPGC were derived from the same littermates at E10.5 or E13.5, respectively.
