# Supplementary material for: High-resolution DNA methylome analysis of primordial germ cells identifies gender-specific reprogramming in mice
Source: HighWire-hosted journal article supplement (doi:10.1101/gr.148023.112), 2013-02-14
Supplement: TableS2.xlsx [file TableS2.xlsx]

## Sheet: TableS2
Supplementary Table 2. Average and median CpG methylation levels of each chromosome in sliding 200-kb windows.
Chromosome	Methylation levels in sliding 200-kb windows	E10.5mPGC	E10.5fPGC	E13.5mPGC	E13.5fPGC	E16.5mPGC	E16.5fPGC
chr1	Average	0.171	0.162	0.038	0.035	0.29	0.028
	Median	0.158	0.15	0.029	0.024	0.311	0.017
	SE	± 4.8%	± 4.6%	± 2.6%	± 2.9%	± 11.1%	± 2.9%
chr2	Average	0.155	0.146	0.033	0.027	0.308	0.022
	Median	0.146	0.137	0.025	0.019	0.327	0.013
	SE	± 4.2%	± 4.0%	± 2.0%	± 2.2%	± 10.6%	± 2.2%
chr3	Average	0.175	0.164	0.039	0.035	0.262	0.028
	Median	0.164	0.153	0.03	0.025	0.281	0.018
	SE	± 4.6%	± 4.4%	± 2.2%	± 2.6%	± 10.4%	± 2.6%
chr4	Average	0.168	0.159	0.039	0.036	0.29	0.029
	Median	0.155	0.145	0.028	0.022	0.307	0.016
	SE	± 5.6%	± 5.4%	± 3.1%	± 3.4%	± 10.8%	± 3.5%
chr5	Average	0.167	0.159	0.037	0.032	0.283	0.026
	Median	0.158	0.149	0.026	0.021	0.298	0.014
	SE	± 5.1%	± 5.0%	± 2.9%	± 3.2%	± 10.8%	± 3.1%
chr6	Average	0.167	0.159	0.038	0.034	0.291	0.027
	Median	0.155	0.147	0.028	0.022	0.298	0.015
	SE	± 4.9%	± 4.6%	± 2.6%	± 2.8%	± 11.1%	± 2.8%
chr7	Average	0.173	0.166	0.048	0.044	0.295	0.035
	Median	0.146	0.14	0.03	0.027	0.303	0.014
	SE	± 7.4%	± 7.8%	± 4.2%	± 4.0%	± 11.5%	± 4.5%
chr8	Average	0.161	0.153	0.034	0.03	0.289	0.023
	Median	0.156	0.149	0.027	0.021	0.307	0.015
	SE	± 4.0%	± 3.8%	± 1.9%	± 2.1%	± 10.9%	± 2.2%
chr9	Average	0.16	0.15	0.035	0.03	0.329	0.024
	Median	0.147	0.138	0.025	0.019	0.348	0.012
	SE	± 5.0%	± 4.8%	± 2.7%	± 2.9%	± 9.1%	± 2.9%
chr10	Average	0.169	0.157	0.035	0.03	0.279	0.023
	Median	0.162	0.15	0.028	0.023	0.29	0.015
	SE	± 3.9%	± 3.7%	± 2.0%	± 2.2%	± 9.4%	± 2.2%
chr11	Average	0.143	0.136	0.029	0.024	0.335	0.018
	Median	0.135	0.128	0.022	0.016	0.339	0.009
	SE	± 4.0%	± 3.8%	± 1.8%	± 2.0%	± 8.5%	± 2.0%
chr12	Average	0.166	0.158	0.038	0.034	0.296	0.028
	Median	0.153	0.143	0.027	0.022	0.309	0.016
	SE	± 5.3%	± 5.3%	± 2.9%	± 3.3%	± 11.0%	± 3.4%
chr13	Average	0.168	0.16	0.037	0.034	0.309	0.028
	Median	0.158	0.15	0.028	0.022	0.319	0.016
	SE	± 4.7%	± 4.5%	± 2.5%	± 2.8%	± 9.5%	± 2.9%
chr14	Average	0.169	0.161	0.039	0.034	0.278	0.027
	Median	0.161	0.153	0.03	0.025	0.298	0.017
	SE	± 4.5%	± 4.5%	± 2.4%	± 2.6%	± 12.4%	± 2.6%
chr15	Average	0.165	0.155	0.035	0.031	0.297	0.024
	Median	0.158	0.149	0.027	0.022	0.308	0.015
	SE	± 4.4%	± 4.2%	± 2.2%	± 2.4%	± 10.7%	± 2.3%
chr16	Average	0.163	0.154	0.035	0.03	0.27	0.024
	Median	0.152	0.143	0.028	0.022	0.285	0.015
	SE	± 4.3%	± 4.0%	± 2.2%	± 2.4%	± 11.8%	± 2.5%
chr17	Average	0.168	0.159	0.037	0.033	0.292	0.027
	Median	0.159	0.151	0.028	0.023	0.305	0.016
	SE	± 4.8%	± 4.5%	± 2.4%	± 2.7%	± 10.7%	± 2.8%
chr18	Average	0.165	0.155	0.035	0.03	0.313	0.024
	Median	0.156	0.147	0.027	0.021	0.321	0.015
	SE	± 4.2%	± 4.0%	± 2.2%	± 2.4%	± 8.9%	± 2.5%
chr19	Average	0.149	0.142	0.032	0.028	0.322	0.022
	Median	0.142	0.134	0.023	0.018	0.331	0.011
	SE	± 4.9%	± 4.7%	± 2.5%	± 2.8%	± 8.3%	± 3.0%
chrX	Average	0.206	0.204	0.058	0.063	0.207	0.055
	Median	0.184	0.183	0.041	0.047	0.195	0.037
	SE	± 8.6%	± 7.9%	± 4.8%	± 5.2%	± 9.4%	± 5.3%
chrY	Average	0.292		0.109		0.183
	Median	0.306		0.107		0.18
	SE	± 10.0%		± 4.1%		± 8.7%
