# Supplementary material for: High-resolution DNA methylome analysis of primordial germ cells identifies gender-specific reprogramming in mice
Source: HighWire-hosted journal article supplement (doi:10.1101/gr.148023.112), 2013-02-14
Supplement: TableS3.xlsx [file TableS3.xlsx]

## Sheet: TableS3
Supplementary Table 3. Genomic distribution/abundance of transposable elements (TEs) in mouse genome and demethylation-resistant regions in PGCs
Families of TEs	Whole genome (Chr1-19, X)	Demethylation-resistant regions (Methylation levels ≥ 10% in E13.5mPGC)	Demethylation-resistant regions (Methylation levels ≥ 10% in E13.5fPGC)
LINE/L1	0.192591	0.328591	0.332935
LTR/MaLR	0.043422	0.0362685	0.0365043
LTR/ERVK	0.0408949	0.0974747	0.0975886
SINE/Alu	0.0249674	0.0169816	0.0164126
Simple_repeat	0.0240341	0.0172217	0.0172493
SINE/B4	0.0223188	0.0119792	0.0118668
SINE/B2	0.0222423	0.0153052	0.0147463
LTR/ERVL	0.0114463	0.0131047	0.0125725
LTR/ERV1	0.00839278	0.0194021	0.018401
Low_complexity	0.00741087	0.0056202	0.00578169
DNA/MER1_type	0.00675229	0.00345173	0.00342093
SINE/MIR	0.00549902	0.00187394	0.00179045
LINE/L2	0.00394603	0.00160609	0.00152437
Other	0.00275661	0.00237682	0.00241391
DNA/MER2_type	0.00224398	0.00107679	0.00102643
SINE/ID	0.0016881	0.000634879	0.000623819
LINE/CR1	0.000550551	0.000249636	0.000241458
Unknown	0.000539201	0.00356135	0.00340904
DNA/Tip100	0.000538377	0.000213818	0.000223207
Satellite	0.000435585	0.00185838	0.00175125
DNA/AcHobo	0.000312997	0.000457621	0.000433105
scRNA	0.000243652	0.000109652	0.00010758
LINE/RTE	0.000197798	9.09242e-05	7.91983e-05
DNA/Tc2	0.00013392	5.40606e-05	5.63557e-05
DNA/hAT	0.000120645	3.87121e-05	3.53061e-05
tRNA	0.000110891	7.18485e-05	7.03936e-05
DNA/TcMar	0.000100289	4.45909e-05	5.29592e-05
snRNA	9.32416e-05	0.000109652	0.00010758
DNA/Mariner	8.46615e-05	2.85455e-05	3e-05
LTR/Gypsy	6.63916e-05	4.18333e-05	3.88921e-05
rRNA	6.39623e-05	4.19091e-05	4.84111e-05
DNA/Charlie	5.60517e-05	1.01212e-05	1.13848e-05
DNA/MuDR	5.46849e-05	1.35303e-05	2.207e-05
DNA/Tigger	5.00953e-05	1.75606e-05	1.51312e-05
Unknown/Y-chromosome	4.88599e-05	2.99848e-05	2.98688e-05
SINE	4.53135e-05	6.60606e-06	6.18076e-06
RNA	4.48819e-05	4.58939e-05	3.72595e-05
LTR/Gypsy?	4.18091e-05	2.02273e-05	1.47668e-05
DNA/MER1_type?	3.77864e-05	2.43182e-05	2.33819e-05
DNA	3.69444e-05	1.0303e-05	7.30321e-06
DNA/hAT?	3.3351e-05	1.71212e-06	1.64723e-06
LTR/ERV1?	3.29137e-05	5.05152e-05	4.65598e-05
RC/Helitron	2.52244e-05	0	0
LTR/ERVL?	2.47545e-05	0.000109258	0.000113499
Low_complexity/ERVL	2.46192e-05	2.56061e-06	1.72012e-06
SINE/tRNA	2.13441e-05	2.14545e-05	2.16181e-05
DNA/TcMar?	1.99212e-05	4.68182e-06	6.88047e-06
DNA/PiggyBac	1.89894e-05	6.87879e-06	4.40233e-06
LTR/ERV	1.88928e-05	0	3.35277e-06
srpRNA	1.40125e-05	9.60606e-06	1.20991e-05
LTR	1.14752e-05	0	0
LTR/Genie?	7.70483e-06	5.87879e-06	5.65598e-06
RC/Helitron?	3.97045e-06	0	0
Satellite/centr	8.52598e-08	0	0
Total bases	2638992663	66000000	68600000
