# Supplementary material for: High-resolution DNA methylome analysis of primordial germ cells identifies gender-specific reprogramming in mice
Source: HighWire-hosted journal article supplement (doi:10.1101/gr.148023.112), 2013-02-14
Supplement: TableS4.xlsx [file TableS4.xlsx]

## Sheet: TableS4
Supplementary Table 4. List of 23,031 mouse CGIs and their methylation profiles
Chromosome	Start	End	ID	CpG observed	CpG obs/exp	G+C composition	Length	CpG density	Symbol	RefSeq	Category	CGI methylation level						10.5PGC		13.5PGC		16.5PGC
												E10.5mPGC	E10.5fPGC	E13.5mPGC	E13.5fPGC	E16.5mPGC	E16.5fPGC	higher	P-value	higher	P-value	higher	P-value
chr1	3521604	3522101	CGI1	29	0.816525	0.693603	297	9.76431	Xkr4	"NM_001011874"	intron	0.300057	0.269165	0.0241935	0.00877496	0.0159115	0.0121191	m	0.834737	m	1	m	1
chr1	3660434	3662858	CGI2	178	0.728255	0.663219	2224	8.0036	Xkr4	"NM_001011874"	exon	0.00831286	0.00410107	0.0107409	0.00749205	0.00611263	0.00639479	m	0.745396	m	0.6724	f	0.642306
chr1	4342301	4342747	CGI3	11	0.503156	0.597561	246	4.47154	Rp1	"NM_011283,NM_001195662"	exon	0.203021	0.226115	0.0264899	0.00346021	0.0096506	0.00420168	f	0.925524	m	0.58367	m	0.642306
chr1	4481601	4483972	CGI4	171	0.756949	0.645325	2171	7.87655	Sox17	"NM_011441"	exon	0.00462408	0.00865856	0.00545409	0.0085415	0.00876741	0.00714604	f	0.702233	f	0.882203	m	0.642306
chr1	4486744	4487898	CGI5	53	0.697292	0.56499	954	5.55556			intergenic	0.00756201	0.00798988	0.00582148	0.00813192	0.00193312	0.00661205	f	0.944793	f	0.928457	f	0.661207
chr1	4561480	4562390	CGI6	56	0.768057	0.642254	710	7.88732			intergenic	0.00997715	0.0108974	0.00799792	0.00771116	0.00579212	0	f	0.703198	m	0.893081	m	0.266772
chr1	4678110	4678658	CGI7	19	0.575013	0.623563	348	5.45977			intergenic	0.0542966	0.119243	0	0.0139752	0.00873016	0.0150794	f	0.367098	f	0.406713	f	0.6736
chr1	4775361	4776178	CGI8	52	0.952604	0.596434	617	8.42788	Mrpl15	"NR_033530,NM_001177658,NM_025300"	exon	0.00582108	0.00919262	0.0116585	0.0119388	0.00386332	0.0159859	f	0.967727	f	0.890654	f	0.489222
chr1	4797422	4798475	CGI9	98	1.05326	0.661196	853	11.4889	Lypla1	"NM_008866"	exon	0.00575322	0.00210256	0.00576356	0.00400733	0.00542125	0.00517857	m	0.680908	m	0.895631	m	0.642306
chr1	4847389	4848656	CGI10	96	0.890093	0.636364	1067	8.99719	Tcea1	"NM_001159750,NM_011541,NM_001159751"	exon	0.0031522	0.00594468	0.00463136	0.00368736	0.00404964	0.00307443	f	0.940457	m	0.894057	m	0.660058
chr1	5008184	5011312	CGI11	162	0.60657	0.604508	2928	5.53279	Rgs20	"NM_021374,NM_001177795"	exon	0.00535891	0.00827875	0.0113128	0.00553777	0.00666591	0.00775162	f	0.658785	m	0.686556	f	0.918365
chr1	5012800	5013239	CGI12	15	0.68183	0.631799	239	6.27615	Rgs20	"NM_001177795"	intron	0	0.022549	0.00884615	0.00227273	0.00583333	0.0143223	f	0.545199	m	0.894057	f	0.806753
chr1	5013483	5014014	CGI13	18	0.643833	0.583082	331	5.43807	Rgs20	"NM_001177795"	intron	0.00763126	0.0373816	0.004329	0.00842491	0.00870875	0.0162121	f	0.572886	f	0.895631	f	0.964229
chr1	5072902	5073723	CGI14	54	0.754856	0.679549	621	8.69565	Atp6v1h	"NM_133826"	exon	0.00881247	0.00740741	0.0106746	0.00191571	0.00652896	0	m	0.762274	m	0.625058	m	0.127584
chr1	5906267	5907697	CGI15	89	0.79301	0.605691	1230	7.23577	Npbwr1	"NM_010342"	exon	0.0248731	0.0156905	0.00652391	0.00437641	0.00363698	0.000732601	m	0.783002	m	0.895631	m	0.379268
chr1	6204111	6205772	CGI16	128	0.850139	0.64271	1461	8.76112	Rb1cc1	"NM_009826"	exon	0.00910898	0.0088141	0.00596689	0.00608245	0.00324951	0.00537932	m	1	f	0.974525	f	0.642306
chr1	6349011	6349718	CGI17	32	0.605959	0.654832	507	6.31164	Fam150a	"NM_001195732"	exon	0.00678662	0.00636574	0.0129795	0	0.00277778	0	m	1	m	0.58402	m	0.644281
chr1	6372747	6373472	CGI18	54	0.883102	0.68381	525	10.2857	Fam150a	"NM_001195732"	intron	0.00254176	0.0147879	0.0112394	0.00459402	0.0110851	0.00550233	f	0.658785	m	0.84458	m	0.40143
chr1	6430839	6432065	CGI19	69	0.712306	0.61501	1026	6.72515			intergenic	0.0265585	0.0423568	0.0165351	0.00277778	0.00461916	0.00126263	f	0.954375	m	0.315042	m	0.63864
chr1	7078366	7079624	CGI20	92	0.879632	0.630435	1058	8.69565	Pcmtd1	"NM_183028"	exon	0.00713199	0.00586086	0.0107417	0.0034279	0.0131899	0.00587484	m	1	m	0.400745	m	0.486732
chr1	7387661	7388890	CGI21	75	0.691288	0.652089	1029	7.28863			intergenic	0.00538972	0.00386383	0.00973042	0.00334514	0.0215884	0.00297619	m	0.89462	m	0.78159	m	0.0619145
chr1	9288666	9290360	CGI22	91	0.719983	0.585676	1494	6.09103	Sntg1	"NM_027671"	exon	0.00556796	0.00250255	0.0102746	0.00718292	0.00446735	0.00265246	m	0.629858	m	0.956086	m	0.737249
chr1	9535028	9536420	CGI23	102	0.838376	0.639262	1192	8.55705	Rrs1	"NM_021511"	exon	0.00794441	0.00818037	0.00639925	0.0032476	0.00732142	0.00483405	f	0.976679	m	0.616739	m	0.354356
chr1	9639290	9639649	CGI24	8	0.522896	0.622642	159	5.03145			intergenic	0.168371	0.0960003	0.0192308	0.00591716	0.00307692	0.00384615	m	0.443592	m	1	f	1
chr1	9689645	9691283	CGI25	135	0.847135	0.668289	1438	9.38804	Mybl1	"NM_008651"	exon	0.00917375	0.00903359	0.0145139	0.00485233	0.0135802	0.00595556	m	0.913862	m	0.415046	m	0.647687
chr1	9737434	9738929	CGI26	99	0.877059	0.591506	1295	7.64479	1700034P13Rik,Vcpip1	"NR_040462","NM_173443"	exon	0.0100917	0.00880946	0.0125279	0.0111563	0.0020845	0.00592536	m	0.923556	m	0.703542	f	0.694583
chr1	9787663	9788932	CGI27	134	1.10328	0.674462	1069	12.5351	Sgk3	"NM_177547,NM_133220"	exon	0.00692972	0.0112598	0.006704	0.00904187	0.00521458	0.00244176	f	0.910987	f	0.949004	m	0.59812
chr1	9838019	9838956	CGI28	50	0.726379	0.616011	737	6.78426	Sgk3	"NM_177547,NM_133220,NM_001037759"	exon	0.00342243	0	0.00879558	0.00843319	0.00835459	0.0026617	m	0.659138	m	0.895631	m	0.628401
chr1	9933669	9934666	CGI29	54	0.844744	0.567127	797	6.77541	Snhg6	"NR_024067"	exon	0.00419654	0.00628789	0.00445011	0.00945228	0.0110979	0.00896686	f	1	f	0.78159	m	0.522702
chr1	9956909	9958604	CGI30	154	0.892744	0.679599	1495	10.301			intergenic	0.0132703	0.00839789	0.00859692	0.00779201	0.00723856	0.00709378	m	0.794615	m	0.896398	m	0.781346
chr1	10027536	10028624	CGI31	55	0.828393	0.547297	888	6.19369	Cops5,Cspp1	"NM_013715","NM_026493"	exon	0.00942668	0.00791911	0.00682469	0.0086387	0.00686683	0.00474298	m	0.80066	f	0.893081	m	0.750448
chr1	10029502	10030507	CGI32	77	0.822723	0.690683	805	9.56522	Cspp1	"NM_026493"	intron	0.0115871	0.00272933	0.0138007	0.00569801	0.0108305	0	m	0.505998	m	0.6724	m	0.0995192
chr1	10221967	10223693	CGI33	178	0.949836	0.70118	1526	11.6645	Arfgef1	"NM_001102430"	exon	0.00944484	0.00723351	0.00558504	0.00581727	0.00654098	0.00727998	m	0.855902	f	0.887208	f	0.850353
chr1	10983244	10984291	CGI34	71	0.830456	0.637544	847	8.38253	Prex2	"NM_029525"	exon	0.0119536	0.0047894	0.00782497	0.00847008	0.00857465	0.00352113	m	0.892246	f	0.934636	m	0.253418
chr1	11319534	11319947	CGI35	10	0.567652	0.577465	213	4.69484			intergenic	0.0310278	0.0125	0.0176156	0.0163399	0.00653595	0.0118835	m	0.924936	m	1	f	0.81745
chr1	11403855	11404799	CGI36	52	0.732382	0.61828	744	6.98925	A830018L16Rik	"NM_001160371,NM_177173,NM_001160369,NM_001160370"	exon	0.0054677	0.00551785	0.00558917	0.00292991	0.00415092	0.00211864	f	1	m	0.78159	m	0.496769
chr1	12826011	12826439	CGI37	12	0.719574	0.54386	228	5.26316	Sulf1	"NM_172294,NM_001198566,NM_001198565"	exon	0.0184615	0.00240385	0.0474242	0	0.0295043	0	m	0.86868	m	0.37447	m	0.183637
chr1	12980076	12983118	CGI38	167	0.712861	0.574595	2842	5.87614	Slco5a1	"NM_172841"	exon	0.0171829	0.016756	0.0082723	0.00498716	0.00909722	0.00437788	m	0.943941	m	0.809739	m	0.21826
chr1	13116268	13116982	CGI39	34	0.752992	0.593385	514	6.61479	Prdm14	"NM_001081209"	intron	0.0105114	0.00586338	0.0085438	0.0167163	0.00992633	0.00227009	m	0.872673	f	1	m	0.480598
chr1	13118452	13118903	CGI40	15	0.861258	0.533865	251	5.9761			intergenic	0.0116151	0.00350877	0.0151597	0.00928793	0.011396	0.0355122	m	0.68997	m	0.78159	f	0.686272
chr1	13362193	13365073	CGI41	264	0.793745	0.706343	2680	9.85075	Ncoa2	"NM_008678,NM_001077695"	exon	0.00832847	0.00651087	0.00974463	0.00926569	0.011415	0.00586535	m	0.900974	m	0.78159	m	0.195845
chr1	13521662	13522023	CGI42	9	0.72396	0.565217	161	5.59006			intergenic	0.0763423	0.0210583	0	0.00919913	0.0174228	0	m	0.488053	f	0.6724	m	0.354356
chr1	13579064	13580509	CGI43	128	0.93281	0.664257	1245	10.2811	Tram1	"NM_028173"	exon	0.00575533	0.011564	0.0093091	0.00993309	0.00924631	0.00600038	f	0.895042	f	0.965246	m	0.498247
chr1	13650045	13650955	CGI44	55	0.758953	0.639437	710	7.74648	Lactb2	"NM_145381"	exon	0.0110535	0.00230655	0.00833333	0.00586072	0.0037751	0.00256126	m	0.629823	m	0.672562	m	0.86512
chr1	14299648	14300341	CGI45	41	0.859681	0.622718	493	8.31643	Eya1	"NM_010164,NM_001252192"	exon	0.00743331	0.00440917	0.00705889	0.00656085	0.00448934	0.00545552	m	0.822957	m	0.78159	f	0.852576
chr1	14496382	14497431	CGI46	57	0.659723	0.639576	849	6.71378			intergenic	0.00211864	0.00854701	0.0149184	0.00838658	0.0101697	0	f	0.871862	m	0.938962	m	0.24135
chr1	14744996	14746430	CGI47	87	0.686989	0.641005	1234	7.05024	Msc	"NM_010827"	exon	0.0140984	0.012077	0.00473977	0.00659137	0.0124549	0.00241069	m	0.889191	f	0.931274	m	0.354356
chr1	14908570	14909103	CGI48	17	0.649663	0.573574	333	5.10511	Trpa1	"NM_177781"	exon	0.0286195	0.00347222	0	0.0104463	0.00462963	0.00505051	m	0.642002	f	0.6724	f	0.82781
chr1	15276271	15277747	CGI49	95	0.691345	0.659875	1276	7.44514			intergenic	0.0114014	0.00577139	0.00712359	0.0050833	0.00736687	0.003125	m	0.632844	m	0.895631	m	0.377471
chr1	15641096	15641558	CGI50	15	0.815769	0.534351	262	5.72519	Kcnb2	"NM_001098528"	intron	0.333048	0.209533	0	0.00653595	0.00625	0.00625	m	0.258236	f	0.78159	-	1
chr1	15795457	15796552	CGI51	70	0.832604	0.613408	895	7.82123	Terf1	"NM_009352"	exon	0.0148236	0.0101502	0.00348559	0.00502083	0.00847833	0.00340741	m	0.84763	f	0.889883	m	0.629338
chr1	15882285	15883222	CGI52	53	0.603445	0.693351	737	7.19132	Gm106	"NM_001033288"	exon	0.00269139	0.0149669	0.00625338	0.0110693	0.00401762	0.00554226	f	0.546878	f	0.881078	f	1
chr1	16082790	16083675	CGI53	51	0.644524	0.681752	685	7.44526	4930444P10Rik	"NM_001243238"	exon	0.0146057	0.00819964	0.0127198	0.00582751	0.00463629	0.00366692	m	0.549613	m	0.6724	m	0.847805
chr1	16094082	16096704	CGI54	219	0.888699	0.639554	2422	9.04211	Rdh10,Rpl7	"NM_133832","NM_011291"	exon	0.00469612	0.00837549	0.0105073	0.00409721	0.0049445	0.00689521	f	0.922436	m	0.287639	f	1
chr1	16508514	16510373	CGI55	155	0.887456	0.68053	1659	9.34298	Stau2	"NM_025303,NM_001111272"	exon	0.00290198	0.00711795	0.00614326	0.00940035	0.00661407	0.0122422	f	0.888989	f	0.829791	f	0.753276
chr1	16608452	16609761	CGI56	123	0.930485	0.691614	1109	11.0911	Ube2w	"NM_001271016,NM_001271017,NM_025773,NR_073122"	exon	0.0101205	0.00362771	0.00707392	0.00378075	0.00514625	0.00633117	m	0.433434	m	0.895631	f	0.902872
chr1	16646428	16647410	CGI57	46	0.704083	0.584399	782	5.88235	Tceb1	"NM_026456"	exon	0.0131561	0.00403361	0.00592593	0	0.00291667	0.00260417	m	0.628521	m	0.6724	m	0.822672
chr1	16654977	16655871	CGI58	60	0.863982	0.636888	694	8.64553	Tmem70	"NM_027415,NM_026392"	exon	0.0119179	0.0210738	0.0102386	0.00485625	0.0037518	0.0068379	f	0.84233	m	0.6724	f	1
chr1	17081527	17082270	CGI59	36	0.769874	0.587477	543	6.62983	Jph1	"NM_020604"	exon	0.262088	0.270187	0.00738095	0.015476	0.00465909	0.00192308	f	0.925769	f	0.6724	m	0.642306
chr1	17086634	17088375	CGI60	139	0.803878	0.675535	1541	9.02012	Jph1	"NM_020604"	exon	0.00469043	0.00547761	0.00553524	0.00642957	0.00893515	0.00464263	f	0.809009	f	0.980415	m	0.491324
chr1	17135323	17135980	CGI61	26	0.641045	0.597374	457	5.68928	Gdap1	"NM_010267"	exon	0.0146972	0.0159273	0.00490662	0.00547665	0.00587889	0.003367	f	0.67605	f	1	m	0.642306
chr1	18047709	18049242	CGI62	104	0.847606	0.609152	1333	7.80195			intergenic	0.00620111	0.00829211	0.0105935	0.010272	0.000881834	0.00413808	f	0.952693	m	0.925809	f	0.56986
chr1	19086925	19087349	CGI63	13	0.62756	0.616071	224	5.80357			intergenic	0.0121965	0.0138889	0.00655618	0.00347222	0.00346021	0	f	0.950252	m	0.8981	m	0.642306
chr1	19094072	19095096	CGI64	46	0.653275	0.603155	824	5.58252	Tfap2d	"NM_153154"	exon	0.0042517	0.00432099	0.00623254	0.00412088	0.00753968	0.0144211	f	1	m	0.905413	f	0.87726
chr1	19199662	19200616	CGI65	50	0.834256	0.571618	754	6.6313	Tfap2b	"NM_009334"	intron	0.00650531	0.00342262	0.00405823	0.00321502	0.00189988	0.00107759	m	0.766926	m	0.923954	m	0.642306
chr1	19203858	19204655	CGI66	39	0.753297	0.61809	597	6.53266	Tfap2b	"NM_009334,NM_001025305"	exon	0.00661028	0.0153061	0.00256739	0.00208333	0.00306074	0	f	0.948424	m	0.902922	m	0.489573
chr1	19224044	19224511	CGI67	17	0.744455	0.588015	267	6.36704	Tfap2b	"NM_009334,NM_001025305"	exon	0.0124003	0.0132156	0.00755735	0.0132881	0.00872763	0.00657895	f	1	f	0.852286	m	0.767539
chr1	19226511	19227078	CGI68	24	0.752947	0.591281	367	6.53951	Tfap2b	"NM_009334,NM_001025305"	exon	0.0170228	0.0111111	0	0.0034965	0	0.0215924	m	0.915721	f	0.78159	f	0.415537
chr1	20809855	20810591	CGI69	49	0.903609	0.649254	536	9.14179	Mcm3	"NM_008563"	exon	0.0015083	0.00572917	0.00427122	0.00391633	0.00262605	0.00462248	f	0.778293	m	1	f	0.839084
chr1	20880383	20881572	CGI70	58	0.655188	0.622851	989	5.86451	6720483E21Rik,Paqr8	"NR_040492","NM_028829"	exon	0.00483871	0.00861297	0.0148994	0.00909009	0.00556403	0.00396825	f	0.765415	m	0.78159	m	0.709445
chr1	20924569	20925771	CGI71	52	0.604547	0.592814	1002	5.18962	Paqr8	"NM_028829"	exon	0.211817	0.171927	0.0300778	0.00759262	0.0288325	0	m	0.488128	m	0.381545	m	1.53748e-06
chr1	20941509	20942236	CGI72	31	0.612967	0.637571	527	5.88235	Efhc1	"NM_027974"	exon	0.00893437	0.0263072	0.00277778	0.00891105	0.00252525	0.00320513	f	0.620233	f	0.601777	f	0.99039
chr1	21068715	21070057	CGI73	89	0.717105	0.664623	1142	7.79335	Tram2	"NM_177409"	exon	0.0043401	0.0097565	0.00366472	0.00354986	0.00793665	0.00166667	f	0.795906	m	0.998156	m	0.421156
chr1	21156376	21156824	CGI74	14	0.689489	0.576613	248	5.64516			intergenic	0.00416667	0.00666667	0.00957265	0.0171491	0.00512821	0.00555556	f	1	f	0.849804	f	1
chr1	21208646	21209147	CGI75	11	0.490265	0.548173	301	3.65449	Tmem14a	"NM_029398"	exon	0.0342157	0.003125	0.003125	0.0112745	0.015101	0	m	0.772631	f	0.895631	m	0.354356
chr1	21950547	21952572	CGI76	154	0.777967	0.659178	1825	8.43836	Kcnq5	"NM_023872,NM_001160139"	exon	0.00639034	0.00504958	0.0052632	0.0048645	0.00609496	0.00440476	m	0.903753	m	1	m	0.358889
chr1	22020391	22020769	CGI77	10	0.702534	0.567416	178	5.61798			intergenic	0.349453	0.26305	0.0587121	0.0260437	0.00647065	0	m	0.70035	m	0.954238	m	0.354356
chr1	22539795	22541193	CGI78	123	0.916206	0.672788	1198	10.2671	Rims1	"NM_183018,NM_053270,NM_001012625,NM_001012624,NM_001012623"	exon	0.00473125	0.014152	0.00711671	0.0110222	0.00426107	0.00428531	f	0.36699	f	0.902764	f	0.898941
chr1	22811989	22813535	CGI79	89	0.601874	0.665676	1346	6.61218	Rims1	"NM_183018,NM_053270,NM_001012625,NM_001012624,NM_001012623"	exon	0.0126004	0.0133653	0.0104538	0.00690537	0.00774545	0.00571895	f	0.850761	m	0.83453	m	0.642306
chr1	23108465	23109187	CGI80	30	0.674841	0.584291	522	5.74713	4933415F23Rik	"NM_025746"	exon	0.447418	0.442815	0.0108257	0.0472566	0.0208498	0.00597709	m	0.930071	f	0.386699	m	0.236189
chr1	23262614	23264045	CGI81	132	0.954888	0.672624	1231	10.723			intergenic	0.0192997	0.00342252	0.00606061	0.00673222	0.00406228	0.00416126	m	0.431147	f	0.821276	f	1
chr1	23389135	23390528	CGI82	114	0.799883	0.694887	1193	9.55574	Ogfrl1	"NM_001081079"	exon	0.00542608	0.00530356	0.00689288	0.00711296	0.00787521	0.011082	m	0.99528	f	1	f	0.988895
chr1	23768392	23770508	CGI83	148	0.734631	0.650835	1916	7.72443	B3gat2	"NM_172124"	exon	0.0058657	0.00867789	0.0103781	0.00464489	0.00548828	0.00703972	f	0.810222	m	0.738439	f	0.899373
chr1	23928316	23929519	CGI84	117	0.933917	0.708873	1003	11.665	Smap1	"NM_028534"	exon	0.00434473	0.00848339	0.0107525	0.00349817	0.0042298	0.00251464	f	1	m	0.501311	m	0.870625
chr1	24012003	24012808	CGI85	46	0.917912	0.578512	605	7.60331	1110058L19Rik	"NM_026503"	exon	0.00960304	0.00431615	0.0103671	0.00660244	0.00779672	0	m	0.794615	m	0.91711	m	0.200164
chr1	24106173	24107716	CGI86	135	0.884448	0.674609	1343	10.0521	Fam135a	"NM_026604"	exon	0.00714874	0.00596551	0.00918796	0.0130601	0.00804658	0.00411021	m	0.968851	f	0.895631	m	0.362967
chr1	24140552	24141089	CGI87	18	0.584668	0.614243	337	5.34125			intergenic	0.069203	0.0892225	0.00662879	0.00511509	0.00662879	0	f	1	m	1	m	0.480598
chr1	24460158	24460740	CGI88	25	0.930341	0.541885	382	6.5445	Col19a1	"NM_007733"	exon	0.196787	0.349923	0.012381	0.00240385	0.093235	0	f	0.588426	m	0.889883	m	0.110913
chr1	24593028	24594505	CGI89	96	0.807918	0.612373	1277	7.51762	Col19a1	"NM_007733"	exon	0.00742738	0.0052112	0.00926853	0.00695114	0.00437161	0.00252525	m	0.834333	m	0.78159	m	0.735604
chr1	24601936	24602473	CGI90	17	0.598859	0.581602	337	5.04451			intergenic	0.429981	0.415428	0.030049	0.0356303	0.0532448	0.00666667	m	0.900657	f	0.797403	m	0.0102965
chr1	24618280	24618932	CGI91	8	0.606023	0.369469	452	1.76991			intergenic	0	0.142857	0	0	0.2	0	f	0.908652	-	NA	m	0.744904
chr1	24618990	24622290	CGI92	53	0.588101	0.365806	3100	1.70968			intergenic	0.00177305	0.0013089	0.00516891	0.0256533	0.00331136	0	m	1	f	0.78159	m	0.545504
chr1	24622507	24623083	CGI93	6	0.433336	0.393617	376	1.59574			intergenic	0.0833333	0.166667	0	0			f	1	-	NA
chr1	24685008	24686237	CGI94	74	0.783029	0.606414	1029	7.19145	Lmbrd1	"NM_026719"	exon	0.0124147	0.00708383	0.0122909	0.00171233	0.0105795	0.00471014	m	0.678951	m	0.67366	m	0.28378
chr1	25285324	25285896	CGI95	21	0.909446	0.5	372	5.64516	Bai3	"NM_175642"	exon	0.0114943	0.00137931	0.00803676	0.00431034	0.0015674	0.00559785	m	1	m	0.78159	f	0.792288
chr1	25886424	25887858	CGI96	113	0.88918	0.647488	1234	9.15721	Bai3	"NM_175642"	exon	0.00669586	0.0044265	0.0117198	0.00550129	0.0039488	0.0059681	m	0.863541	m	0.940495	f	0.860746
chr1	29793848	29794280	CGI97	20	0.956504	0.612069	232	8.62069			intergenic	0.375751	0.450019	0.0781566	0.178809	0.132138	0.122768	f	0.851445	f	0.66355	m	0.219689
chr1	30826439	30826814	CGI98	10	0.771955	0.56	175	5.71429			intergenic	0.288499	0.210295	0.0412518	0.0306726	0.021459	0	m	0.546878	m	1	m	0.154779
chr1	30929541	30931217	CGI99	167	0.971045	0.683604	1476	11.3144			intergenic	0.0106079	0.00445421	0.00802168	0.00912894	0.00686463	0.00328407	m	0.430957	f	1	m	0.607517
chr1	31005533	31007180	CGI100	168	1.03671	0.670352	1447	11.6102	Gm13363,Ptp4a1	"NR_002688","NM_011200"	exon	0.00411795	0.00822637	0.0107954	0.00587988	0.00579977	0.00306254	f	0.855623	m	0.58402	m	0.487789
chr1	32229106	32230135	CGI101	55	0.645212	0.641737	829	6.6345	Khdrbs2	"NM_133235"	exon	0.00726223	0.00377358	0.00494418	0.0164476	0.00825075	0.00292398	m	0.701527	f	0.58402	m	0.298606
chr1	33694702	33695201	CGI102	15	0.731002	0.561873	299	5.01672	Prim2	"NM_008922"	intron	0.220399	0.126963	0.0208333	0.0419388	0.0160929	0.0192982	m	0.574627	f	0.38981	f	0.906823
chr1	33726229	33727582	CGI103	80	0.799973	0.589766	1153	6.93842	1700001G17Rik,Prim2	"NR_033199","NM_008922"	exon	0.00945088	0.00788093	0.0112753	0.00528156	0.00778461	0.0057807	m	0.817049	m	0.78159	m	0.928748
chr1	33776419	33777777	CGI104	101	0.948723	0.608808	1158	8.72193	Rab23	"NM_008999,NM_001159729"	exon	0.00471628	0.00963274	0.00852335	0.00488266	0.0080685	0.00573102	f	0.798187	m	0.825269	m	0.757766
chr1	33796136	33796509	CGI105	8	0.631314	0.543353	173	4.62428	Rab23	"NM_008999,NM_001159729"	exon	0.0715794	0.116482	0.0178338	0	0.38609	0	f	0.773821	m	0.6724	m	0.000938833
chr1	33813882	33815088	CGI106	76	0.738242	0.640159	1006	7.55467	Bag2	"NM_145392"	exon	0.016766	0.0113378	0.00742972	0.00899033	0.00496792	0.00250436	m	0.885728	f	0.894057	m	0.726293
chr1	33870676	33871772	CGI107	83	0.81314	0.677455	896	9.26339	Zfp451	"NM_133817"	exon	0.0101817	0.0102911	0.00780275	0.00689434	0.00503953	0.00433833	f	0.76073	m	0.895849	m	1
chr1	33940260	33940671	CGI108	11	0.743639	0.530806	211	5.21327	Bend6	"NM_177235"	exon	0.00952381	0	0.0122015	0	0.0405622	0	m	0.794615	m	0.500399	m	0.0530621
chr1	33963641	33965718	CGI109	171	0.889813	0.642515	1877	9.11028	Bend6	"NM_177235"	exon	0.0156181	0.00613946	0.00739953	0.00891085	0.0122785	0.00960882	m	0.0810154	f	0.936048	m	0.642306
chr1	34001880	34002247	CGI110	8	0.565677	0.586826	167	4.79042			intergenic	0.32247	0.135964	0	0.0104167	0.0190686	0	m	0.296859	f	0.783436	m	0.354356
chr1	34062658	34063246	CGI111	22	0.800192	0.536082	388	5.6701			intergenic	0.0101981	0	0	0.0101092	0.0221576	0.00384615	m	0.658785	f	0.58402	m	0.25271
chr1	34067663	34069124	CGI112	84	0.636961	0.647105	1261	6.66138	Dst	"NM_134448,NM_133833"	exon	0.012063	0.00310078	0.00704949	0.00968845	0.00888889	0.00423977	m	0.552532	f	0.868804	m	0.632792
chr1	34234697	34235288	CGI113	31	0.872994	0.616368	391	7.92839	Dst	"NM_134448,NM_133833"	intron	0.187345	0.182047	0.00235018	0	0.0378326	0.00896281	m	1	m	0.78159	m	0.0236067
chr1	34292857	34293738	CGI114	34	0.519422	0.621145	681	4.99266	Dst	"NM_134448,NM_133833"	intron	0.023792	0.0119691	0.00518018	0.00806521	0.0268869	0.00583538	m	0.700821	f	0.915172	m	0.141115
chr1	34489593	34490251	CGI115	30	0.744851	0.593886	458	6.55022	Mir5103	"NR_039562"	exon	0.00845784	0.0304595	0.0179685	0.00392157	0.00514706	0.00757576	f	0.515655	m	0.459125	f	1
chr1	34491634	34492172	CGI116	19	0.769173	0.547337	338	5.6213			intergenic	0.00531814	0.00462963	0.00529101	0.002849	0.00345579	0.00154321	m	0.903753	m	1	m	0.806753
chr1	34495873	34497310	CGI117	71	0.713458	0.567502	1237	5.73969	Ccdc115,Imp4	"NM_027159","NM_178601"	exon	0.00938608	0.00503324	0.00778018	0.00712326	0.00531722	0.00663194	m	0.744696	m	0.957787	f	0.790239
chr1	34516129	34517213	CGI118	59	0.694645	0.621041	884	6.67421	Ptpn18	"NM_011206"	exon	0.0212147	0.00402576	0.0103228	0.00804262	0.00132275	0.0084845	m	0.111783	m	0.872628	f	0.480598
chr1	34529310	34530325	CGI119	45	0.56326	0.629448	815	5.52147	Ptpn18	"NM_011206"	exon	0.00337963	0.00594444	0.00833491	0.00520186	0.00219587	0.00238692	f	1	m	0.893719	f	1
chr1	34542317	34542992	CGI120	21	0.630625	0.530526	475	4.42105			intergenic	0.017526	0.0326255	0.0101496	0.00320513	0.00840336	0.00420875	f	0.958817	m	0.78159	m	1
chr1	34617512	34617956	CGI121	14	0.624328	0.610656	244	5.7377	Prss40	"NM_009356"	exon	0.259134	0.203429	0	0.00705467	0.0415927	0.0102513	m	0.825346	f	0.685969	m	0.0822281
chr1	34635878	34637161	CGI122	64	0.662618	0.599261	1083	5.90951	Fam123c	"NM_213727"	exon	0.00423515	0.0137032	0.00815535	0.0127905	0.0039907	0.00482026	f	0.921403	f	0.801164	f	1
chr1	34734551	34735738	CGI123	61	0.705451	0.605876	987	6.18034			intergenic	0.00696304	0.0182347	0.000904977	0.00677656	0.00503108	0.00329829	f	0.794615	f	0.67366	m	1
chr1	34780491	34780930	CGI124	12	0.634932	0.577406	239	5.02092			intergenic	0.244128	0.390164	0	0	0.00606061	0.0134454	f	0.346089	-	NA	f	0.807793
chr1	34806909	34808340	CGI125	114	0.773393	0.693745	1231	9.26076			intergenic	0.00964258	0.00890269	0.00736364	0.007846	0.00342713	0.00167832	m	0.889699	f	0.818145	m	0.741459
chr1	34858378	34859249	CGI126	47	0.62929	0.669151	671	7.00447	Arhgef4	"NM_183019"	exon	0.0129462	0.0060825	0.00196078	0	0.00490196	0.00307692	m	0.945526	m	0.78159	m	0.809113
chr1	34862702	34863452	CGI127	33	0.687684	0.6	550	6	Arhgef4	"NM_183019"	exon	0.0394684	0.0428508	0.0117792	0.0062033	0.00795549	0.00308642	f	0.950932	m	0.850588	m	0.499207
chr1	34899174	34900434	CGI128	111	1.01818	0.645283	1060	10.4717	Fam168b	"NM_174997,NM_001160236,NM_001160235"	exon	0.00569423	0.00375375	0.00536117	0.00817426	0.00262942	0.00356394	m	0.59085	f	0.895631	f	0.94213
chr1	34906513	34907206	CGI129	39	0.77052	0.651116	493	7.91075	Plekhb2	"NM_145516,NM_175421"	exon	0.021618	0.0126984	0.0104701	0.00954416	0.00476992	0	m	0.794615	m	0.935714	m	0.497977
chr1	34986283	34987619	CGI130	68	0.63297	0.615317	1136	5.98592			intergenic	0.515899	0.527918	0.040826	0.0690602	0.0329707	0.038654	f	0.927041	f	0.134577	f	0.642306
chr1	35272977	35273349	CGI131	8	0.655325	0.563953	172	4.65116			intergenic	0.523042	0.574867	0	0.0446429	0.00789474	0.0166461	f	1	f	0.6724	f	0.765646
chr1	36087367	36087873	CGI132	16	0.630559	0.578431	306	5.22876			intergenic	0.125734	0.0974642	0.00679825	0.0181287	0.00701477	0.00292398	m	0.829137	f	0.912538	m	0.642306
chr1	36124556	36126572	CGI133	173	0.848067	0.670705	1816	9.52643	Hs6st1	"NM_015818"	exon	0.00481978	0.00838199	0.00474338	0.00732037	0.00614069	0.00361354	f	0.937086	f	0.926538	m	0.488518
chr1	36160201	36161240	CGI134	49	0.685727	0.584029	839	5.84029	Hs6st1	"NM_015818"	exon	0.332375	0.33192	0.0529277	0.0320397	0.0173835	0.00709707	m	0.911846	m	0.865755	m	0.354356
chr1	36300555	36301468	CGI135	58	0.791455	0.645161	713	8.13464	Uggt1	"NM_198899"	exon	0.0140521	0.0097746	0.00290841	0.00763301	0.00554001	0.00322671	m	0.89858	f	0.827773	m	0.555965
chr1	36311610	36311994	CGI136	10	0.684445	0.565217	184	5.43478			intergenic	0.0195925	0.0195312	0.0147569	0.00347222	0.0155533	0	m	1	m	0.892663	m	0.254986
chr1	36325456	36326821	CGI137	73	0.761751	0.576824	1165	6.26609	Neurl3	"NM_153408"	exon	0.106471	0.0655247	0.00973897	0.0145712	0.0166285	0.00243386	m	0.592696	f	0.875128	m	0.00779828
chr1	36360061	36360547	CGI138	22	0.791238	0.632867	286	7.69231			intergenic	0.00833333	0.00512821	0.00505051	0.0169643	0.0149425	0.00396825	m	0.906039	f	0.895631	m	0.814367
chr1	36364316	36365514	CGI139	73	0.799744	0.60521	998	7.31463	Arid5a	"NR_033310,NM_145996,NM_001172206,NM_001172205"	exon	0.00975002	0.00262832	0.0090959	0.00563725	0.0107419	0.0100007	m	0.669449	m	0.852375	m	0.811507
chr1	36425259	36426547	CGI140	104	0.847313	0.674632	1088	9.55882	Kansl3	"NM_172652"	exon	0.0133196	0.00310043	0.00501594	0.00569648	0.00559023	0.001	m	0.149313	f	1	m	0.256149
chr1	36465229	36465869	CGI141	24	0.579948	0.615909	440	5.45455			intergenic	0.284822	0.256369	0.0118792	0.0109295	0.0231212	0.00357143	m	0.841789	m	0.859257	m	0.0361165
chr1	36501461	36502397	CGI142	52	0.747058	0.631793	736	7.06522	Lman2l	"NM_001013374"	exon	0.00314707	0.00631313	0.0131131	0.0119959	0.006157	0.00175439	f	1	m	0.78159	m	0.306915
chr1	36527818	36529439	CGI143	120	0.79804	0.654469	1421	8.44476	Cnnm4	"NM_033570"	exon	0.0137762	0.0143192	0.00454937	0.00860646	0.00482809	0.00264771	f	0.954931	f	0.9479	m	0.692671
chr1	36568144	36570158	CGI144	198	0.892311	0.70011	1814	10.9151	Cnnm3	"NM_053186,NM_001039551"	exon	0.00669974	0.0102791	0.00522017	0.00502139	0.00505301	0.0012963	f	0.714207	m	0.990332	m	0.354356
chr1	36598543	36599077	CGI145	16	0.535469	0.601796	334	4.79042	Ankrd39	"NM_026241"	exon	0.205031	0.228457	0.032478	0	0.324344	0.00882353	f	0.872657	m	0.214533	m	2.41014e-05
chr1	36603513	36604588	CGI146	53	0.644834	0.617143	875	6.05714	Ankrd39	"NM_026241"	exon	0.00619607	0.0191646	0.00950522	0.00775983	0.00936797	0.00114943	f	0.930216	m	1	m	0.287673
chr1	36609432	36609993	CGI147	18	0.550482	0.614958	361	4.98615	Sema4c	"NM_001126047"	exon	0.189078	0.102919	0.0156598	0.0265991	0.258025	0.00976377	m	0.0573114	f	0.788867	m	8.57278e-05
chr1	36613344	36615871	CGI148	164	0.66734	0.650193	2327	7.0477	Sema4c	"NM_001126047"	exon	0.00658382	0.010799	0.0053784	0.0104501	0.00701529	0.00580645	f	1	f	0.895631	m	0.515898
chr1	36739540	36740418	CGI149	46	0.715639	0.616519	678	6.78466	Fam178b	"NM_001126046,NM_201365"	exon	0.392271	0.356867	0.0260611	0.00614198	0.0155257	0.00848485	m	0.811185	m	0.127342	m	0.480598
chr1	36747900	36749157	CGI150	77	0.824939	0.59508	1057	7.28477	Cox5b	"NM_009942"	exon	0.0188242	0.00495445	0.00484906	0.0065043	0.0017316	0.00866574	m	0.433154	f	0.894857	f	0.472058
chr1	36766259	36767168	CGI151	53	0.723892	0.643159	709	7.47532	Actr1b	"NM_146107"	exon	0.003996	0.00834075	0.0104072	0.00363636	0.00599762	0.00192308	f	0.826916	m	0.474568	m	0.516631
chr1	36803342	36803730	CGI152	8	0.559394	0.553191	188	4.25532	4933424G06Rik	"NR_040290"	exon	0.0946441	0.0666977	0.0119048	0.019185	0.0213675	0.00793651	m	0.903753	f	0.927599	m	0.76749
chr1	36815797	36816300	CGI153	16	0.755288	0.534653	303	5.28053			intergenic	0.122691	0.143185	0.0026455	0	0.010905	0.00396825	f	0.944793	m	0.78159	m	0.642306
chr1	36827463	36828359	CGI154	49	0.70741	0.632184	696	7.04023	Zap70	"NM_009539"	exon	0.0303037	0.033875	0.00446336	0.00912762	0.0154792	0	f	0.905106	f	0.915172	m	0.051563
chr1	36835836	36836245	CGI155	14	0.831938	0.569378	209	6.69856	Zap70	"NM_009539"	exon	0.242342	0.246836	0.00544218	0.0218821	0.0305077	0.00680272	f	1	f	0.500399	m	0.240129
chr1	36841774	36842664	CGI156	30	0.620864	0.530435	690	4.34783			intergenic	0.00830046	0.0130332	0.0107906	0.0151136	0.0114481	0.00303644	f	0.930839	f	0.934929	m	0.427508
chr1	36995567	36997274	CGI157	171	0.977117	0.68215	1507	11.347	Tmem131	"NM_018872"	exon	0.00231355	0.00752158	0.00454963	0.00804502	0.0100186	0.00286624	f	0.545199	f	0.857691	m	0.135468
chr1	37085725	37086520	CGI158	29	0.612475	0.564706	595	4.87395			intergenic	0	0.00245995	0.011381	0.00319069	0.00653557	0	f	0.659031	m	0.745938	m	0.354356
chr1	37275339	37275800	CGI159	8	0.432617	0.544061	261	3.06513			intergenic	0.036799	0.0528758	0.0127381	0	0.0297533	0.00794118	f	0.941688	m	0.58402	m	0.557621
chr1	37318023	37318432	CGI160	12	0.787518	0.545455	209	5.74163	Cnga3	"NM_009918"	exon	0.269332	0.212938	0.0123457	0.0317206	0.040159	0.00932401	m	0.658785	f	0.6724	m	0.479763
chr1	37356388	37357531	CGI161	78	0.84151	0.636267	943	8.27147	Inpp4a	"NM_030266"	exon	0.00466067	0.013	0.00867072	0.00243902	0.00396832	0.0010352	f	0.817049	m	0.327161	m	0.475775
chr1	37486313	37487778	CGI162	94	0.809882	0.606324	1265	7.43083	Coa5,Unc50	"NM_198006","NM_026123"	exon	0.00606344	0.00688487	0.00367716	0.00302718	0.00223084	0.00574374	f	0.903753	m	0.93398	f	0.892115
chr1	37597032	37598472	CGI163	113	0.795784	0.68629	1240	9.1129			intergenic	0.0124954	0.00314386	0.00527903	0.0082178	0.00241849	0.0018018	m	0.658939	f	0.691636	m	0.518354
chr1	37670975	37671386	CGI164	9	0.495596	0.601896	211	4.2654	2010300C02Rik	"NM_028096"	exon	0.11004	0.0581786	0.0294639	0.0297619	0.0286458	0.00392157	m	0.795144	f	0.6724	m	0.640491
chr1	37743860	37744483	CGI165	18	0.575829	0.555556	423	4.25532	2010300C02Rik	"NM_028096"	intron	0.240759	0.138408	0.0782811	0.0170807	0.170886	0.00979455	m	0.357994	m	0.239357	m	4.14504e-06
chr1	37775849	37777229	CGI166	118	0.859106	0.683051	1180	10	2010300C02Rik	"NM_028096"	exon	0.00452938	0.0114738	0.00646288	0.0115494	0.00836935	0.0114244	f	0.798062	f	0.870549	f	1
chr1	37921225	37922573	CGI167	98	0.774089	0.675087	1148	8.53659	Tsga10	"NM_207228"	exon	0.00635698	0.00623626	0.0101914	0.00480527	0.00214561	0.00704949	m	0.896407	m	0.6724	f	0.642306
chr1	37929016	37929566	CGI168	21	0.948656	0.511429	350	6	Lipt1	"NM_001037918"	exon	0.00226244	0	0.0025641	0	0.00274725	0	m	0.794615	m	0.78159	m	0.642954
chr1	37932004	37932787	CGI169	33	0.834469	0.521441	583	5.66038	Lipt1	"NM_001037918"	exon	0.330803	0.252336	0.0436811	0.0203548	0.0583398	0.0110501	m	0.356565	m	0.512443	m	0.00890529
chr1	37946831	37947732	CGI170	50	0.925513	0.556348	701	7.13267	Mitd1,Mrpl30	"NM_026913","NM_027098"	exon	0.0105515	0.00557328	0.00430435	0.0126934	0	0.00929996	m	0.92614	f	0.652098	f	0.126456
chr1	38053590	38054443	CGI171	44	0.782724	0.588055	653	6.73813	Txndc9	"NM_172054"	exon	0.0157546	0.002	0.00553846	0.0122662	0.00905929	0.004	m	0.374733	f	0.6724	m	0.390106
chr1	38054554	38055672	CGI172	102	0.928909	0.700436	918	11.1111	Eif5b	"NM_198303"	exon	0.00725554	0.00495081	0.00718532	0.00703813	0.00920163	0.00645708	m	0.950659	m	0.88611	m	0.642508
chr1	38185595	38187488	CGI173	204	1.00899	0.692262	1693	12.0496	Rev1	"NM_019570"	exon	0.00668451	0.0103281	0.0138049	0.00953612	0.00866725	0.00195667	f	0.841909	m	0.6724	m	0.253799
chr1	38266700	38267471	CGI174	37	0.629097	0.642732	571	6.47986	Aff3	"NM_010678"	exon	0.128912	0.14135	0.043178	0.00698006	0.0361484	0.0110897	f	0.901227	m	0.101908	m	0.120934
chr1	38274931	38275394	CGI175	17	0.572457	0.676806	263	6.46388	Aff3	"NM_010678"	exon	0.0617314	0.0653769	0.00647773	0.0105159	0.026859	0.00714286	f	0.987725	f	0.905471	m	0.642306
chr1	38296299	38296737	CGI176	11	0.678289	0.533613	238	4.62185	Aff3	"NM_010678"	intron	0.242528	0.146119	0.0144803	0.0159722	0	0	m	0.544133	f	1	-	NA
chr1	38415599	38416377	CGI177	26	0.542136	0.577855	578	4.49827	Aff3	"NM_010678"	intron	0.184417	0.224807	0.03236	0.00529412	0.0150641	0.00351852	f	0.707646	m	0.25142	m	0.500623
chr1	38683193	38685249	CGI178	189	0.830588	0.702047	1856	10.1832	Aff3	"NM_010678"	exon	0.00705281	0.0138237	0.00544474	0.00775439	0.0058946	0.00844988	f	0.498691	f	0.888224	f	0.954119
chr1	38892321	38894105	CGI179	153	0.914768	0.651515	1584	9.65909			intergenic	0.00849372	0.0117763	0.00647728	0.00639441	0.00484085	0.00443336	f	1	m	0.998692	m	0.793842
chr1	38954141	38955304	CGI180	72	0.780568	0.62513	963	7.47664	Chst10	"NM_145142"	exon	0.00996052	0.00818252	0.015606	0.00634257	0.00159817	0.000978474	m	0.918765	m	0.783436	m	0.807793
chr1	39002790	39003185	CGI181	12	0.83053	0.548718	195	6.15385	Nms	"NM_001011684"	exon	0.234008	0.221058	0.00277008	0.0121185	0.0298241	0	m	0.88456	f	0.78159	m	0.098612
chr1	39044169	39045021	CGI182	49	0.723588	0.645706	652	7.51534	Pdcl3	"NM_026850"	exon	0.00878227	0.00154321	0.0130328	0.00205761	0.0022539	0.00481561	m	0.659138	m	0.311033	f	0.843881
chr1	39249204	39251641	CGI183	171	0.702988	0.659812	2237	7.64417	Npas2	"NM_008719"	exon	0.00963007	0.00977985	0.00797136	0.0107067	0.00452906	0.00187638	f	0.931654	f	0.935736	m	0.814564
chr1	39418702	39419072	CGI184	10	0.684024	0.588235	170	5.88235	Npas2	"NM_008719"	exon	0.0565292	0.0193878	0.0226079	0.00510204	0.0165693	0.0142857	m	0.554466	m	0.612149	m	0.401089
chr1	39424056	39425739	CGI185	108	0.911548	0.566419	1483	7.28254	Rpl31	"NM_001252218,NM_001252219,NM_053257"	exon	0.00599562	0.0255849	0.00888251	0.00658692	0.0098664	0.00740741	f	0.498509	m	0.78159	m	0.530756
chr1	39534540	39535984	CGI186	109	0.835494	0.651125	1244	8.76206	Tbc1d8	"NM_018775"	exon	0.00646093	0.00567166	0.00777563	0.00640293	0.000849618	0	m	0.902993	m	0.78159	m	0.642306
chr1	39592045	39593377	CGI187	116	0.92471	0.666078	1132	10.2473	D1Bwg0212e	"NM_028043"	exon	0.0111721	0.00724823	0.0119453	0.00975317	0.00461259	0.00440503	m	0.658785	m	0.78159	m	1
chr1	39633141	39634784	CGI188	143	0.944685	0.648649	1443	9.90991	Rnf149	"NM_001033135"	exon	0.0144501	0.00699721	0.00451531	0.00700248	0.00784396	0.00640492	m	0.794615	f	0.900339	m	0.922603
chr1	39706873	39708355	CGI189	87	0.696652	0.625585	1282	6.78627	Creg2	"NM_170597"	exon	0.0111109	0.0156942	0.00341094	0.00213675	0.00424219	0.00842134	f	0.873389	m	0.822883	f	0.948522
chr1	39777343	39778128	CGI190	39	0.597539	0.670085	585	6.66667	Rfx8	"NM_001145660"	exon	0.00754999	0.00555556	0.0096723	0.0033393	0.00909121	0.00208333	m	0.940457	m	0.904065	m	0.480598
chr1	39956855	39958997	CGI191	189	0.899379	0.658084	1942	9.73223	Map4k4	"NM_001252202,NM_008696,NM_001252200,NM_001252201"	exon	0.009408	0.00834005	0.00903325	0.00823755	0.0285358	0.0026455	m	0.837248	m	0.58402	m	0.0561578
chr1	39992500	39992928	CGI192	5	0.36007	0.495614	228	2.19298	Map4k4	"NM_001252202,NM_008696,NM_001252200,NM_001252201"	intron	0	0	0	0.00438596	0	0	-	NA	f	0.8365	-	NA
chr1	39993002	39993739	CGI193	19	0.503425	0.532588	537	3.53818	Map4k4	"NM_001252202,NM_008696,NM_001252200,NM_001252201"	intron	0	0	0.0253518	0.0115646	0.00916667	0	-	NA	m	0.902922	m	0.480598
chr1	40142506	40143009	CGI194	15	0.683256	0.544554	303	4.9505	Gm16894,Il1r2	"NR_037980","NM_010555"	exon	0.0125185	0.0132439	0.00529101	0.0112943	0.00793651	0	f	1	f	0.895631	m	0.642306
chr1	40323149	40323882	CGI195	35	0.611566	0.65666	533	6.5666	Il1r1	"NM_008362,NM_001123382"	exon	0.010428	0.00972222	0.00869011	0.00429894	0.0143298	0.00715488	m	0.783166	m	0.78159	m	0.860717
chr1	40382254	40383128	CGI196	34	0.63307	0.568249	674	5.04451	Il1rl2	"NM_133193"	intron	0.010265	0.00833333	0.0035409	0	0.0087968	0.00651201	m	0.778128	m	0.6724	m	0.700612
chr1	40737370	40739323	CGI197	146	0.770688	0.65773	1753	8.32858	Slc9a2	"NM_001033289"	exon	0.00327395	0.00456311	0.00791284	0.00389096	0.00704225	0.00323122	f	0.900223	m	0.895631	m	0.826463
chr1	40824511	40824890	CGI198	10	0.564281	0.631285	179	5.58659	Slc9a2	"NM_001033289"	exon	0.147994	0.176968	0.00534759	0.0286291	0	0.00392157	f	0.89904	f	0.6724	f	0.642306
chr1	40847180	40847946	CGI199	34	0.656386	0.606007	566	6.00707	Mfsd9	"NM_172499"	exon	0.0198694	0.0341194	0.00843391	0.00812435	0	0.00745614	f	1	m	1	f	0.354356
chr1	42318701	42319111	CGI200	8	0.46197	0.57619	210	3.80952			intergenic	0.0333333	0.00490196	0	0.00641026	0.00490196	0	m	1	f	0.783436	m	0.642954
chr1	42472817	42473210	CGI201	11	0.729842	0.57513	193	5.69948			intergenic	0.190657	0.186554	0.0168651	0.0251736	0	0.00833333	m	1	f	1	f	0.642306
chr1	42548311	42549019	CGI202	35	0.791781	0.590551	508	6.88976			intergenic	0.0101841	0.00788288	0.00239085	0.00640889	0.00646718	0.00619369	m	0.782208	f	0.787741	m	1
chr1	42740998	42742085	CGI203	53	0.615434	0.624577	887	5.9752	2610017I09Rik	"NR_027826"	intron	0.011939	0.0102052	0.00577296	0.00522195	0.00398685	0.00605517	m	0.939529	m	0.93398	f	0.980094
chr1	42742921	42743950	CGI204	51	0.695349	0.597105	829	6.15199	2610017I09Rik	"NR_027826"	intron	0.0128769	0.00762446	0.00505051	0.00526966	0.0104233	0.00329452	m	0.86543	f	0.939854	m	0.480598
chr1	42750670	42752231	CGI205	91	0.802609	0.577517	1361	6.68626	2610017I09Rik	"NR_027826"	exon	0.00575179	0.00802579	0.00935862	0.00847133	0.00369281	0.00696063	f	0.898371	m	0.78159	f	0.98028
chr1	42752263	42756153	CGI206	348	0.872771	0.657724	3690	9.43089	Pou3f3	"NM_008900"	exon	0.00661664	0.00656011	0.00677164	0.00436761	0.00693042	0.00445832	m	0.937266	m	0.78159	m	0.731227
chr1	42769941	42770779	CGI207	39	0.702358	0.600313	638	6.11285			intergenic	0.000886525	0.00754831	0.00611006	0.00575455	0.00713518	0.00177305	f	0.891012	m	0.956846	m	0.484046
chr1	42771131	42771527	CGI208	13	0.579952	0.678571	196	6.63265			intergenic	0.0206349	0	0.003663	0	0.0307692	0	m	0.658785	m	0.895631	m	0.642508
chr1	42837245	42837612	CGI209	10	0.909124	0.51497	167	5.98802			intergenic	0.292905	0.178232	0.0384061	0.0237574	0.0350784	0.0137255	m	0.727301	m	0.899491	m	0.536631
chr1	42907715	42908837	CGI210	48	0.606938	0.593275	922	5.20607	Mrps9	"NM_023514"	exon	0.00222746	0.00954033	0.0125388	0.0174274	0.00947208	0.00658627	f	0.808392	f	0.904065	m	0.638735
chr1	43009484	43010729	CGI211	85	0.681042	0.691866	1045	8.13397	Gpr45	"NM_053107"	exon	0.00770308	0.0259475	0.00722222	0.0108001	0.00337302	0	f	0.92614	f	0.78159	m	0.504123
chr1	43089015	43090056	CGI212	40	0.595633	0.568371	841	4.75624	Gpr45	"NM_053107"	exon	0.26985	0.180523	0.0104602	0.0174897	0.0273296	0	m	0.0319948	f	0.602583	m	0.00317857
chr1	43148401	43149943	CGI213	109	0.790239	0.652012	1342	8.12221	Tgfbrap1	"NM_001013025"	intron	0.00664357	0.0115483	0.0109125	0.00566473	0.00800982	0.00607013	f	0.724433	m	0.597819	m	0.919592
chr1	43155093	43156004	CGI214	53	0.713401	0.646976	711	7.45429	AI597479,Tgfbrap1	"NM_133818","NM_001013025"	exon	0.00567144	0.00289366	0.0033867	0.0106835	0.00272936	0	m	0.823771	f	0.529328	m	0.38473
chr1	43180217	43180926	CGI215	24	0.691919	0.524558	509	4.71513	Fhl2	"NM_010212"	exon	0.13341	0.169036	0.0226044	0.00384615	0.0303491	0.00240385	f	0.758293	m	0.529328	m	0.0112133
chr1	43220225	43221350	CGI216	61	0.670211	0.629189	925	6.59459	Fhl2	"NM_010212"	exon	0.0208108	0.0132676	0.00955087	0.00481924	0.00304233	0.00206767	m	1	m	0.934165	m	0.872729
chr1	43501955	43503756	CGI217	142	0.818966	0.662711	1601	8.86946	Nck2	"NM_010879"	exon	0.00509987	0.0144009	0.0114743	0.0073066	0.00682757	0.00499625	f	0.944793	m	0.6724	m	0.480598
chr1	43610730	43611198	CGI218	16	0.658919	0.608209	268	5.97015	Nck2	"NM_010879"	exon	0.294958	0.300989	0.036726	0	0	0	f	0.920181	m	0.315686	-	NA
chr1	43787419	43787854	CGI219	11	0.473904	0.634043	235	4.68085	1500015O10Rik	"NM_024283"	exon	0.0578592	0.132603	0	0.0145833	0.035654	0	f	0.327542	f	0.6724	m	0.0287405
chr1	43883728	43885197	CGI220	111	0.839888	0.646178	1269	8.74704	Uxs1	"NM_026430"	exon	0.0124642	0.012201	0.00715493	0.012413	0.00698312	0.00388655	m	0.940457	f	0.6724	m	0.56439
chr1	43954808	43955268	CGI221	16	0.677712	0.603846	260	6.15385			intergenic	0.399646	0.331925	0.0363029	0.0093985	0.0269338	0.0154122	m	0.794615	m	0.478301	m	0.642306
chr1	43990260	43991598	CGI222	93	0.829525	0.628295	1138	8.17223	Tpp2	"NM_009418"	exon	0.0116486	0.00561823	0.00546797	0.0111226	0.00568763	0.00378986	m	0.655423	f	0.893081	m	0.654452
chr1	44158389	44159711	CGI223	109	1.07512	0.605169	1122	9.7148	1700029F09Rik	"NM_029368"	exon	0.00825199	0.00994364	0.00613219	0.00156578	0.00777818	0.00336416	f	0.924007	m	0.753364	m	0.775615
chr1	44175121	44175884	CGI224	28	0.672288	0.545293	563	4.97336	Kdelc1	"NM_023645"	exon	0.00576225	0.0018018	0.00542878	0.00421727	0.0050282	0.00522317	m	0.794615	m	0.919405	f	0.889243
chr1	44175939	44177058	CGI225	45	0.526263	0.610446	919	4.89663	Bivm	"NM_144558"	exon	0.0138578	0.00886243	0.00439815	0.0014881	0.0031746	0.00895568	m	1	m	0.895631	f	0.371818
chr1	44204191	44205242	CGI226	66	0.850416	0.606345	851	7.75558	Ercc5	"NM_011729"	exon	0.00515428	0.00351979	0.00114155	0.00167641	0.00950918	0.0030754	m	0.929568	f	0.895772	m	0.354356
chr1	44255391	44256133	CGI227	42	0.854096	0.603321	542	7.74908			intergenic	0.0181878	0.0362911	0.016842	0.00765161	0.010034	0.00625	f	0.791807	m	0.92352	m	0.518274
chr1	44608305	44609476	CGI228	63	0.630935	0.643666	971	6.48816	Gulp1	"NM_028450"	exon	0.00233957	0.0115767	0.00767514	0.00142045	0.00742244	0.00678943	f	0.737829	m	0.67366	m	0.800847
chr1	45851883	45852884	CGI229	64	0.893051	0.604245	801	7.99001	Wdr75	"NM_028599"	exon	0.00820456	0.00471725	0.00519722	0.00692873	0.00764269	0.00488666	m	0.692216	f	0.78159	m	0.541632
chr1	45982026	45983091	CGI230	52	0.703571	0.584971	865	6.01156	Slc40a1	"NM_016917"	exon	0.00844156	0.00357143	0.010797	0.00710057	0.00701486	0.0126834	m	0.913284	m	0.981572	f	0.948655
chr1	46123471	46124093	CGI231	24	0.691086	0.575829	422	5.6872	Dnahc7b	"NM_001160386"	exon	0.00745798	0	0.00552721	0	0.00590659	0.00259826	m	0.545199	m	0.6724	m	0.811568
chr1	46145483	46146354	CGI232	66	0.97778	0.724292	671	9.83607	Dnahc7b	"NM_001160386"	intron	0.162698	0.273989	0.0815668	0.00568182	0	0	f	0.35783	m	0.0406917	-	NA
chr1	46482195	46482692	CGI233	21	0.724901	0.626263	297	7.07071			intergenic	0.0175942	0.0224359	0.00552381	0.00470588	0.0142769	0.00635294	f	0.703691	m	0.902922	m	0.831694
chr1	46909320	46911149	CGI234	176	0.984705	0.666053	1629	10.8042	Slc39a10	"NM_172653"	exon	0.00715806	0.00562996	0.010862	0.00557796	0.00819634	0.00324328	m	0.851962	m	0.614115	m	0.377104
chr1	50983329	50985135	CGI235	97	0.63762	0.620797	1606	6.03985	Tmeff2	"NM_019790"	exon	0.0117906	0.00975542	0.00381538	0.0102632	0.00760077	0.00519697	m	0.829501	f	0.741767	m	0.671159
chr1	51346267	51346864	CGI236	19	0.584936	0.576826	397	4.78589	9330175M20Rik,Sdpr	"NR_045151","NM_138741"	exon	0.245977	0.394834	0.0436516	0.0425	0.005	0.003125	f	0.371773	m	1	m	1
chr1	51483338	51483733	CGI237	11	0.797358	0.533333	195	5.64103			intergenic	0.311978	0.260526	0.0305414	0.0336718	0.0781551	0.036164	m	0.743163	f	1	m	0.649055
chr1	51534493	51535857	CGI238	82	0.805142	0.591924	1164	7.04467	Nabp1	"NM_028696"	exon	0.003367	0.0062842	0.00402389	0.0048212	0.00558375	0.00172502	f	0.794615	f	0.815384	m	0.5836
chr1	51971727	51973467	CGI239	118	0.751453	0.640909	1540	7.66234	Myo1b	"NM_001161817,NM_010863"	exon	0.00547049	0.00861333	0.0040574	0.00615353	0.00633195	0.00830959	f	0.898841	f	0.938324	f	0.740406
chr1	52170264	52170961	CGI240	36	0.70778	0.641851	497	7.24346			intergenic	0.00603751	0.0043875	0.00508201	0.00225225	0.001287	0.003003	m	0.924309	m	0.895631	f	1
chr1	52175972	52177007	CGI241	56	0.744057	0.601198	835	6.70659	Stat1	"NM_001205314,NM_009283,NM_001205313"	exon	0.0111166	0.010178	0.0101845	0.00324074	0.00416065	0.00238829	m	0.830782	m	0.78159	m	0.84937
chr1	52288676	52290659	CGI242	172	0.825775	0.684801	1783	9.64666	Gls	"NM_001113383,NM_001081081"	exon	0.00541836	0.00774295	0.00758335	0.0112162	0.0028439	0.00383707	f	0.908741	f	0.78159	f	0.689447
chr1	52556432	52557974	CGI243	146	0.893034	0.701192	1342	10.8793	Nab1	"NM_008667"	exon	0.00865949	0.00519394	0.0081368	0.0107542	0.00909631	0.00670382	m	0.680908	f	0.944179	m	0.845755
chr1	52654618	52655119	CGI244	11	0.525057	0.55814	301	3.65449			intergenic	0.125479	0.119444	0.0181624	0.00699301	0	0	m	0.92614	m	0.889883	-	NA
chr1	52687234	52688028	CGI245	47	0.758684	0.646465	594	7.91246	Tmem194b	"NR_024590,NM_001142647"	exon	0.00746223	0.00416667	0.00478239	0.00305886	0.0059576	0.014652	m	0.925769	m	0.915172	f	0.950197
chr1	52783103	52784671	CGI246	117	0.760784	0.671053	1368	8.55263	Mfsd6	"NM_178081,NM_133829"	exon	0.0114401	0.0184554	0.0084467	0.00999619	0.00829691	0.00688073	f	0.505185	f	0.93398	m	0.499147
chr1	52873794	52874882	CGI247	62	0.689148	0.63964	888	6.98198	Inpp1	"NM_008384"	exon	0.00263736	0.0065258	0.00716167	0.012988	0.00628205	0.00421911	f	0.734647	f	0.908412	m	0.859329
chr1	52901537	52902336	CGI248	38	0.665268	0.621035	599	6.34391	Hibch	"NM_146108"	exon	0.00337874	0.00251645	0.00487805	0.00275842	0.0092968	0.00691057	m	1	m	0.898659	m	0.700057
chr1	53009285	53010374	CGI249	48	0.541034	0.640045	889	5.39933	1700019D03Rik	"NM_144953"	exon	0.00696316	0.0109363	0.0111176	0.0032345	0.00516873	0.0125812	f	0.794615	m	0.6724	f	0.955494
chr1	53353364	53354389	CGI250	67	0.812516	0.632727	825	8.12121	Ormdl1,Pms1	"NM_145517","NM_153556"	exon	0.00634554	0.0172667	0.00582202	0.00389971	0.00655627	0.00111483	f	0.533538	m	0.929919	m	0.239463
chr1	53409113	53409844	CGI251	43	0.81543	0.630885	531	8.09793	Asnsd1	"NM_133728"	exon	0.018759	0.0062981	0	0.00816664	0.0149682	0.00193798	m	0.83418	f	0.500399	m	0.20521
chr1	53763189	53763885	CGI252	32	0.70713	0.604839	496	6.45161	Dnahc7a	"NM_001252070"	exon	0.0240095	0.0148607	0.00724481	0.0116713	0.011485	0.00583567	m	0.706248	f	0.926413	m	0.837109
chr1	53841141	53842340	CGI253	93	0.924234	0.635636	999	9.30931	Stk17b	"NM_133810"	exon	0.00504099	0.00674699	0.00249956	0.00203799	0.00231081	0.00314327	f	0.92353	m	0.938227	f	0.936711
chr1	54250839	54252359	CGI254	151	0.99959	0.677273	1320	11.4394	Hecw2	"NM_172655,NM_001001883"	exon	0.00719653	0.00543448	0.00481701	0.0079579	0.0079872	0.00209285	m	0.854765	f	0.78159	m	0.323008
chr1	54307243	54307771	CGI255	20	0.699634	0.591463	328	6.09756	Ccdc150	"NM_030025"	exon	0	0.00240385	0.00213675	0.00213675	0.00581197	0	f	0.794615	-	1	m	0.480598
chr1	54495495	54496087	CGI256	29	0.813612	0.609694	392	7.39796	Gtf3c3	"NM_001033194"	exon	0.0104167	0.0225694	0.00183824	0.0014881	0.011241	0	f	0.898371	m	1	m	0.181656
chr1	54613918	54615056	CGI257	62	0.699896	0.628998	938	6.60981	Pgap1	"NM_001163314"	exon	0.010323	0.00412225	0.00441821	0.00769601	0.0118835	0.00592719	m	0.660237	f	0.929423	m	0.649325
chr1	54982241	54983791	CGI258	133	0.866623	0.682963	1350	9.85185	Ankrd44	"NM_001081433"	exon	0.00993629	0.00966738	0.00467658	0.0078688	0.00946976	0.00387147	m	0.927041	f	0.895631	m	0.642306
chr1	55083564	55084689	CGI259	94	0.991368	0.641081	925	10.1622	Sf3b1	"NM_031179"	exon	0.00482688	0.00861563	0.00330992	0.00323635	0.00398022	0.00229469	f	0.707646	m	0.95411	m	0.800545
chr1	55109028	55110394	CGI260	102	0.866585	0.638079	1166	8.74786	Coq10b	"NM_026424,NM_001039710"	exon	0.0077235	0.00514458	0.0106398	0.00120447	0.00999202	0.00492792	m	1	m	0.311033	m	0.196902
chr1	55143811	55145684	CGI261	153	0.83792	0.662881	1673	9.14525	Hspd1,Hspe1	"NM_010477","NM_008303"	exon	0.00805571	0.00538652	0.00600159	0.00913381	0.00564717	0.00496032	m	0.579608	f	0.922966	m	0.845948
chr1	55187718	55188899	CGI262	91	0.787193	0.687054	981	9.27625	Mob4	"NM_025283"	exon	0.00452334	0.00346476	0.00703126	0.00294205	0.00296126	0.00360849	m	0.76256	m	0.78159	f	0.95487
chr1	55293655	55295311	CGI263	114	0.869014	0.600962	1456	7.82967	Mars2	"NM_175439"	exon	0.00795723	0.0125913	0.00474897	0.00803073	0.00516445	0.0086936	f	0.722264	f	0.898316	f	0.705402
chr1	55419055	55420932	CGI264	171	0.867868	0.685748	1677	10.1968	Boll	"NM_001113367,NM_029267"	exon	0.0585982	0.0849361	0.00707674	0.00493244	0.0189037	0.00578853	f	0.704418	m	0.699075	m	0.0317193
chr1	55438517	55439090	CGI265	18	0.590531	0.573727	373	4.82574			intergenic	0.349651	0.350995	0.0278898	0.0145	0.0154116	0	f	1	m	0.438221	m	0.0947763
chr1	55462185	55463938	CGI266	129	0.794706	0.648422	1553	8.3065	Plcl1	"NM_001114663"	exon	0.00923542	0.00461429	0.00579866	0.0105962	0.00537057	0.00837271	m	0.477023	f	0.87305	f	0.787133
chr1	57026249	57026945	CGI267	35	0.716672	0.629032	496	7.05645	Satb2	"NM_139146"	exon	0.00636752	0.00178571	0.00340909	0.00192308	0	0.002457	m	0.794615	m	1	f	0.642306
chr1	57027573	57028161	CGI268	24	0.72367	0.592784	388	6.18557	Satb2	"NM_139146"	exon	0.0108333	0	0.00684524	0.00860806	0.00303658	0.00273133	m	0.658785	f	1	m	1
chr1	57028206	57030645	CGI269	189	0.806917	0.647611	2239	8.44127	9130024F11Rik	"NR_024325,NR_024326"	exon	0.00797857	0.00759655	0.00759329	0.00612793	0.00288875	0.00240465	m	0.94776	m	0.814055	m	0.723716
chr1	57033379	57034964	CGI270	69	0.640867	0.558123	1385	4.98195			intergenic	0.00998298	0.00391236	0.010652	0.00971685	0.0056863	0.00813139	m	0.702937	m	0.938321	f	0.906281
chr1	57041073	57041684	CGI271	22	0.651715	0.574209	411	5.3528			intergenic	0.0113636	0.00730994	0.00277778	0	0.0102525	0.0043573	m	0.93323	m	0.78159	m	0.879658
chr1	57434110	57435210	CGI272	80	0.812426	0.663333	900	8.88889	1700066M21Rik,4930558J18Rik	"NM_028546","NR_037999"	exon	0.00803343	0.0115999	0.0057607	0.0104735	0.00331736	0.00536449	f	0.940457	f	0.792578	f	1
chr1	57462850	57464243	CGI273	85	0.772516	0.609388	1193	7.1249	9430016H08Rik,Tyw5	"NM_001081181","NR_004860,NM_001114102,NM_001037742"	exon	0.00780252	0.0108496	0.00753106	0.00403727	0.00742903	0.00376699	f	0.815554	m	0.6724	m	0.487789
chr1	57830930	57832716	CGI274	146	0.851477	0.662673	1586	9.20555	Spats2l	"NM_144882"	exon	0.00903105	0.0126414	0.00506153	0.00654787	0.00620438	0.00150376	f	0.899404	f	1	m	0.480598
chr1	58026150	58027305	CGI275	66	0.720406	0.62199	955	6.91099	Kctd18	"NR_027630,NM_001159865,NM_001159864"	exon	0.00210438	0.00658794	0.0134104	0.00803489	0.00767755	0.00484848	f	0.743817	m	0.616598	m	0.730631
chr1	58052468	58053354	CGI276	53	0.79933	0.622449	686	7.72595	Sgol2	"NM_001177867,NM_199007"	exon	0.00736286	0.0063704	0.00564103	0	0.0020979	0.0013986	m	0.943941	m	0.500528	m	0.807242
chr1	58449372	58450947	CGI277	150	0.886218	0.707636	1375	10.9091	Bzw1	"NM_025824"	exon	0.00845995	0.0124103	0.00570565	0.0077973	0.00524044	0.00929883	f	0.676842	f	0.989917	f	0.812255
chr1	58480071	58481217	CGI278	82	0.996639	0.591966	946	8.66808	Clk1	"NR_027854,NR_027853,NM_001042634"	exon	0.00846364	0.00647636	0.00613077	0.00377856	0.00423892	0.00312671	m	0.838044	m	0.935524	m	0.729723
chr1	58501810	58502647	CGI279	37	0.667592	0.593407	637	5.80848	Ppil3	"NM_027351,NM_027374"	exon	0.0108154	0.0026455	0.00678194	0.0146742	0.00650837	0.00555556	m	0.668389	f	0.91801	m	0.844402
chr1	58561178	58562188	CGI280	71	0.839032	0.646914	810	8.76543	Orc2	"NM_001271526,NM_008765"	exon	0.00664195	0.0158329	0.00478292	0.00655096	0.00383333	0	f	0.695659	f	1	m	0.266772
chr1	58642552	58643741	CGI281	56	0.724536	0.575329	989	5.66229	Fam126b,Ndufb3	"NM_172513","NM_025597"	exon	0.00524554	0.0120393	0.00813987	0.0100047	0.00857638	0.00964994	f	0.690364	f	1	f	0.89253
chr1	58709231	58709922	CGI282	31	0.621823	0.639511	491	6.31365	Gm20257	"NR_045007"	exon	0.0313889	0.0168522	0.0105601	0.00446177	0.0174397	0.00136054	m	0.889191	m	0.91143	m	0.259649
chr1	58768126	58768878	CGI283	44	0.808187	0.630435	552	7.97101			intergenic	0.0064903	0.00396825	0.00847823	0.00656355	0.00926407	0.00643298	m	0.829137	m	0.932015	m	0.771563
chr1	58770046	58770615	CGI284	24	0.790604	0.574526	369	6.50407	Cflar	"NM_207653,NM_009805"	exon	0.0675549	0.0466817	0.00317617	0.00654762	0.00348639	0.0148714	m	0.658785	f	1	f	0.642306
chr1	58793747	58794118	CGI285	9	0.58023	0.608187	171	5.26316	Cflar	"NM_207653"	intron	0.231641	0.201416	0.00367647	0.0154316	0.013454	0	m	0.726793	f	0.78159	m	0.100742
chr1	58852255	58852880	CGI286	30	0.799254	0.595294	425	7.05882	Casp8	"NM_009812"	exon	0.00422443	0.00213675	0.00515334	0	0.0232295	0.00672193	m	0.794615	m	0.6724	m	0.634947
chr1	59029636	59031176	CGI287	97	0.698213	0.644776	1340	7.23881	Stradb,Trak2	"NM_172656","NM_172406"	exon	0.0122263	0.00454564	0.00980012	0.00630952	0.00569852	0.00251984	m	0.621925	m	0.78159	m	0.642306
chr1	59151580	59151992	CGI288	13	0.699258	0.599057	212	6.13208	Als2cr11	"NM_175200"	exon	0.280117	0.149135	0.019289	0.0287418	0.0123467	0.00292398	m	0.132593	f	0.746598	m	0.480598
chr1	59176390	59177558	CGI289	82	0.768238	0.667355	968	8.47107	Tmem237	"NM_001033449,NM_001037812"	exon	0.00356825	0.0156906	0.00565741	0.00861733	0.00344215	0.00451389	f	0.658785	f	1	f	0.887767
chr1	59293539	59294515	CGI290	65	0.831359	0.635309	776	8.37629	Als2	"NM_001159948,NM_028717,NM_146109"	exon	0.00756056	0.00614844	0.0088788	0.00706286	0.00541282	0.00464511	m	0.758977	m	0.948153	m	0.850182
chr1	59538144	59538732	CGI291	22	0.663621	0.587629	388	5.6701			intergenic	0.0117225	0.00571429	0.00505051	0.008	0.00534759	0	m	0.873352	f	1	m	0.642306
chr1	59538553	59541544	CGI292	229	0.809103	0.637406	2791	8.20494	Fzd7	"NM_008057"	exon	0.0107089	0.00662854	0.0036425	0.010187	0.00682347	0.00578135	m	0.594652	f	0.352989	m	0.642306
chr1	59572814	59573278	CGI293	13	0.625917	0.568182	264	4.92424	Gm973	"NM_001013771"	exon	0.0170585	0.00396825	0.00890313	0.0292756	0.0104655	0	m	0.480168	f	0.895631	m	0.354356
chr1	59726795	59728051	CGI294	87	0.763691	0.658144	1056	8.23864	Sumo1	"NM_009460"	exon	0.01403	0.00935388	0.00907228	0.0117589	0.00651041	0.00748772	m	0.802691	f	1	f	0.521105
chr1	59741615	59742328	CGI295	38	1.00889	0.547758	513	7.40741	Nop58	"NM_018868"	exon	0.00252525	0.00439383	0.00126263	0.00189723	0.00103306	0.00348432	f	0.79124	f	0.8981	f	0.770585
chr1	59819398	59821891	CGI296	206	0.868575	0.643698	2293	8.98386	Bmpr2	"NM_007561"	exon	0.00603766	0.0102032	0.00856769	0.00482916	0.00559734	0.00853695	f	0.496902	m	0.438242	f	1
chr1	59969221	59971150	CGI297	182	0.907752	0.681319	1729	10.5263	Fam117b	"NM_001037725"	exon	0.00709878	0.00641243	0.00991401	0.00722434	0.00840707	0.00707658	m	1	m	0.911942	m	0.721202
chr1	60099216	60100593	CGI298	123	0.95423	0.662702	1177	10.4503	Ica1l	"NM_027407"	exon	0.00833142	0.00800418	0.00750672	0.0108464	0.00931023	0.00516838	m	0.894017	f	0.852375	m	0.480598
chr1	60154323	60154719	CGI299	11	0.912061	0.5	196	5.61224	Wdr12	"NM_001199060,NM_001199061,NM_021312"	exon	0	0.01251	0.0221531	0.00183824	0	0	f	0.658785	m	0.6724	-	NA
chr1	60154813	60155773	CGI300	71	0.83536	0.669737	760	9.34211	Carf,Wdr12	"NM_139150","NM_001199060,NM_001199061"	exon	0.0112467	0.00751492	0.00621563	0.00685885	0.00715574	0.000833333	m	0.54973	f	1	m	0.375732
chr1	60236880	60238131	CGI301	100	0.849484	0.672693	1051	9.51475	Nbeal1	"NM_173444"	exon	0.00725858	0.00997997	0.00865599	0.00694664	0.00491522	0.003595	f	0.903753	m	1	m	0.639206
chr1	60399677	60400777	CGI302	64	0.759757	0.612222	900	7.11111	Cyp20a1	"NM_030013"	exon	0.0105615	0.00873574	0.00469424	0.00501286	0.00595238	0	m	1	f	0.93398	m	0.194052
chr1	60465738	60467299	CGI303	132	0.904083	0.660544	1361	9.69875	Abi2	"NM_001198570,NM_001198571,NM_198127"	exon	0.00477628	0.00368266	0.00499439	0.00689915	0.00837913	0.00343331	m	0.794615	f	0.849178	m	0.497522
chr1	60622745	60624470	CGI304	150	0.887261	0.670164	1525	9.83607	Raph1	"NM_001045513"	exon	0.0106103	0.00767389	0.00695317	0.00953408	0.00633946	0.00261474	m	0.867512	f	0.78159	m	0.493878
chr1	60819831	60820233	CGI305	15	1.19508	0.5	202	7.42574	Cd28	"NM_007642"	exon	0.135396	0.135334	0.00728438	0	0.0324004	0.00284091	m	1	m	0.6724	m	0.036343
chr1	60977906	60978287	CGI306	16	1.221	0.541436	181	8.83978			intergenic	0.555093	0.389474	0.264633	0.254553	0.0891919	0.190877	m	0.494013	m	0.998706	f	0.259389
chr1	61259961	61260325	CGI307	11	0.959338	0.530488	164	6.70732			intergenic	0.010989	0.136353	0.00714286	0.0181973	0.0133438	0.00793651	f	0.0518705	f	0.78159	m	0.64564
chr1	61685079	61686333	CGI308	96	0.764684	0.690702	1054	9.10816	Pard3b	"NM_001081050"	exon	0.0085072	0.00286369	0.014623	0.00536942	0.00342713	0.00266744	m	0.446973	m	0.6724	m	0.868267
chr1	62749172	62750527	CGI309	94	0.806856	0.636364	1155	8.13853	Nrp2	"NM_010939,NM_001077405,NM_001077404,NM_001077403,NM_001077406,NM_001077407"	exon	0.0065754	0.00987681	0.0026066	0.00108932	0.00690105	0.00595468	f	0.905106	m	0.78159	m	0.89426
chr1	62751909	62754492	CGI310	130	0.645417	0.582039	2383	5.45531	Nrp2	"NM_010939,NM_001077405,NM_001077404,NM_001077403,NM_001077406,NM_001077407"	intron	0.00115494	0.00225084	0.00875496	0.00800224	0.00418197	0.00395773	f	0.832827	m	0.905325	m	0.806753
chr1	62842152	62842704	CGI311	22	0.629953	0.642045	352	6.25	Nrp2	"NM_010939,NM_001077405,NM_001077404,NM_001077403,NM_001077406,NM_001077407"	exon	0.058692	0.0428584	0.00320513	0.0126297	0.00699212	0	m	0.86786	f	0.78159	m	0.354356
chr1	63159599	63161480	CGI312	138	0.739171	0.668055	1681	8.2094	Gm11602,Ino80d	"NR_045915,NR_045914","NM_001114609,NM_001081436"	exon	0.0100328	0.00780711	0.0117877	0.0191152	0.00529101	0.0039185	m	1	f	0.953132	m	0.96457
chr1	63222936	63224220	CGI313	83	0.858068	0.597786	1084	7.65683	Eef1b2,Ndufs1	"NM_018796","NM_001160040,NM_001160039,NM_001160038,NM_145518"	exon	0.00602577	0.00988539	0.0102772	0.00865603	0.00328407	0.00558824	f	0.82173	m	1	f	0.296522
chr1	63246657	63247300	CGI314	26	0.862398	0.530474	443	5.86907	Gpr1	"NM_146250"	intron	0.387831	0.343555	0.0151247	0.00179211	0.0129839	0	m	0.874038	m	0.58402	m	0.0733718
chr1	63294578	63295469	CGI315	54	0.897451	0.591896	691	7.81476			intergenic	0.00936553	0.00469692	0.00291219	0.00721006	0.00552312	0.00433209	m	0.690215	f	0.92241	m	0.642306
chr1	63319260	63320704	CGI316	144	1.00887	0.680064	1244	11.5756	Zdbf2	"NM_028673,NM_001267872"	exon	0.00540806	0.00490102	0.0044103	0.00543923	0.00965285	0.00389155	m	0.974393	f	1	m	0.991215
chr1	63355541	63356642	CGI317	94	0.85931	0.713651	901	10.4329	Zdbf2	"NM_028673,NM_001267872"	exon	0.0199798	0.0522716	0.012619	0.00757576	0.0255851	0.0025974	f	0.261835	m	0.841884	m	0.172105
chr1	63491746	63493528	CGI318	116	0.707208	0.64665	1582	7.33249	Adam23	"NM_011780,NM_001177600"	exon	0.0128561	0.0154072	0.00309524	0.00648388	0.0101295	0.00823326	f	0.950912	f	0.720155	m	0.937223
chr1	63660793	63661374	CGI319	22	0.599947	0.627297	381	5.77428			intergenic	0.003663	0	0	0.0113859	0.00194932	0.00444444	m	0.794615	f	0.500399	f	1
chr1	63711161	63711541	CGI320	12	0.91072	0.544444	180	6.66667	Dytn	"NM_001081658"	exon	0.132548	0.0804834	0.0366623	0.0119048	0.0546247	0	m	0.658785	m	0.502225	m	0.0503954
chr1	63776803	63777552	CGI321	32	0.947615	0.499089	549	5.82878	Fastkd2,Mdh1b	"NM_172422","NM_029696"	exon	0.00564784	0.00930233	0.0124159	0.00640053	0.00261628	0.00357143	f	1	m	0.843781	f	1
chr1	64125225	64125736	CGI322	15	0.550594	0.594855	311	4.82315	Klf7	"NM_033563"	exon	0.192315	0.225817	0.0213462	0.00714286	0.189171	0.00454545	f	0.745396	m	0.78159	m	9.73441e-06
chr1	64167730	64169227	CGI323	98	0.766087	0.628373	1297	7.5559	Klf7	"NM_033563"	exon	0.00659785	0.0125276	0.0128834	0.00590643	0.00594498	0.00394568	f	0.944793	m	0.700307	m	0.715622
chr1	64354977	64355608	CGI324	15	0.557422	0.5058	431	3.48028			intergenic	0.185455	0.353795	0.0095369	0	0.0776777	0.00699301	f	0.217223	m	0.58402	m	0.0366609
chr1	64578364	64580432	CGI325	188	0.88686	0.675054	1868	10.0642	Creb1	"NM_001037726,NM_133828,NM_009952"	exon	0.0164851	0.00458671	0.00713056	0.00629034	0.00491367	0.00602587	m	0.0560605	m	0.830884	f	0.993749
chr1	64663304	64664544	CGI326	87	0.792925	0.65	1040	8.36538	Mettl21a	"NM_025964"	exon	0.0142238	0.00975832	0.00372872	0.0147255	0.00850485	0.00403439	m	1	f	0.50639	m	0.839824
chr1	64736685	64738371	CGI327	154	0.931443	0.66891	1486	10.3634	2810408I11Rik,Ccnyl1	"NR_038009","NM_001097644"	exon	0.00717805	0.00827882	0.00839824	0.00597234	0.00304665	0.00229782	f	1	m	0.908008	m	0.748435
chr1	64781239	64785062	CGI328	271	0.736865	0.637317	3623	7.47999	Fzd5	"NM_022721,NM_001042659"	exon	0.0177619	0.0260425	0.0100835	0.00548742	0.00713249	0.00258459	f	0.71867	m	0.488287	m	0.20539
chr1	65002899	65003561	CGI329	41	0.839032	0.662338	462	8.87446	Plekhm3	"NM_001039493"	exon	0.00518519	0.00197628	0.00766178	0.0112444	0.00602007	0.0137763	m	0.89483	f	1	f	0.663019
chr1	65149422	65149948	CGI330	18	0.681888	0.57362	326	5.52147	Cryga	"NM_007774"	exon	0.173625	0.215376	0.0249591	0.00496894	0.0269977	0.0228009	f	0.945909	m	0.430873	m	0.63845
chr1	65156291	65156839	CGI331	20	0.678862	0.583333	348	5.74713	D630023F18Rik	"NM_175293"	exon	0.146963	0.136882	0.0312798	0.00340136	0.0332401	0.003663	m	0.904928	m	0.217221	m	0.0686893
chr1	65225160	65226158	CGI332	47	0.664092	0.600251	798	5.88972	Idh1	"NM_001111320,NM_010497"	exon	0.00887183	0.00209644	0.0162803	0.00541023	0.00650416	0.00283019	m	0.561557	m	0.78159	m	0.675232
chr1	65232721	65233821	CGI333	73	0.841562	0.631111	900	8.11111	Idh1,Pikfyve	"NM_001111320","NM_011086"	exon	0.00796884	0.00337995	0.00721311	0.0125651	0.003617	0.00108225	m	0.682941	f	0.889883	m	0.642306
chr1	65357699	65358438	CGI334	24	0.462133	0.621521	539	4.45269	Pth2r	"NM_139270"	exon	0.00733083	0.0137136	0.019914	0.0138834	0.00223214	0.00616497	f	0.821145	m	1	f	0.806753
chr1	66221321	66222369	CGI335	69	0.71369	0.675708	848	8.13679	Mtap2	"NM_008632,NM_001039934"	exon	0.012058	0.00381653	0.0120594	0.00135685	0.00776144	0.00323794	m	0.679724	m	0.485447	m	0.621037
chr1	66514235	66515563	CGI336	85	0.698354	0.657801	1128	7.53546	Unc80	"NM_175510"	exon	0.00933411	0.00557512	0.00721144	0.0203922	0.00928712	0.00386473	m	0.9793	f	1	m	0.569501
chr1	66747127	66748226	CGI337	72	0.782194	0.640712	899	8.0089	Rpe	"NM_025683"	exon	0.00487831	0.00908491	0.00913963	0.013766	0.00299723	0.00446296	f	0.818282	f	0.811653	f	0.878061
chr1	66862726	66864912	CGI338	171	0.85848	0.637462	1986	8.61027	Kansl1l	"NM_177645,NM_001122738"	exon	0.0122457	0.00107585	0.0120235	0.00550805	0.00922088	0.00213018	m	0.0140896	m	0.6724	m	0.230653
chr1	66909175	66910413	CGI339	90	0.890157	0.626204	1038	8.67052	Acadl	"NM_007381"	exon	0.0141699	0.00998836	0.00714779	0.00253142	0.0114323	0.0101351	m	0.944793	m	0.750057	m	0.642306
chr1	67084867	67085795	CGI340	52	0.786997	0.603022	728	7.14286	Lancl1	"NM_021295,NM_001190985,NM_001190984"	exon	0	0.00756908	0.011419	0.00540123	0.00811174	0	f	0.446936	m	0.544649	m	0.262763
chr1	69152570	69155055	CGI341	144	0.68858	0.605252	2285	6.30197	Erbb4	"NM_010154"	exon	0.00560202	0.00473744	0.00917618	0.0102161	0.00696435	0.00390584	m	0.819347	f	0.805442	m	0.543158
chr1	69423409	69425027	CGI342	82	0.598642	0.622708	1418	5.78279			intergenic	0.539006	0.557514	0.0163712	0.0409887	0.0372229	0.003881	f	0.794615	f	0.179963	m	1.77884e-05
chr1	69733390	69734698	CGI343	110	1.0046	0.629061	1108	9.9278			intergenic	0.00748248	0.00823582	0.00398646	0.00674038	0.00415075	0.0069273	f	0.856294	f	0.67366	f	1
chr1	69873276	69873992	CGI344	36	0.673472	0.653101	516	6.97674	Spag16	"NM_029160,NM_001271533"	exon	0.0185458	0.0156415	0.00729167	0.00412088	0.00406846	0.00373298	m	0.834268	m	1	m	1
chr1	70772111	70772538	CGI345	11	0.572614	0.585903	227	4.84581	Vwc2l	"NM_177164"	exon	0.00961538	0	0.0384615	0.00549451	0.00591716	0	m	0.795257	m	1	m	0.642508
chr1	70886162	70886621	CGI346	19	1.07627	0.53668	259	7.33591	Vwc2l	"NM_177164"	intron	0.174646	0.0942947	0.0191919	0.00588235	0.0025	0.00454545	m	0.589398	m	0.78159	f	1
chr1	71148713	71149913	CGI347	77	0.7734	0.632	1000	7.7	Bard1	"NM_007525"	exon	0.00896213	0.00324675	0.00766526	0.0051491	0.00560337	0.00386501	m	0.500944	m	1	m	0.543927
chr1	71603362	71604336	CGI348	55	0.679003	0.648579	774	7.10594	Atic	"NM_026195"	exon	0.00886396	0.00591767	0.00569728	0.00649093	0.00381403	0.00768942	m	0.88933	f	0.939762	f	0.739253
chr1	71699055	71700220	CGI349	65	0.697947	0.621762	965	6.73575	Apol7d,Fn1	"NR_040308","NM_010233"	exon	0.00919077	0.00335775	0.00738545	0.00452317	0.000891266	0.00314704	m	0.78888	m	0.78159	f	0.642306
chr1	72258089	72259155	CGI350	91	0.97369	0.658199	866	10.5081	Mreg	"NM_001005423"	exon	0.0101102	0.00394206	0.00549368	0.00753328	0.00350143	0.00438913	m	0.658785	f	0.943233	f	0.919246
chr1	72272199	72272707	CGI351	18	0.707911	0.577922	308	5.84416			intergenic	0.0125842	0	0.0078125	0.00769231	0.00384615	0.00714286	m	0.523631	m	0.895631	f	0.912172
chr1	72282742	72283406	CGI352	30	0.754874	0.586207	464	6.46552			intergenic	0.00795925	0.00805556	0.014545	0.010375	0.00834669	0.00631579	f	0.944793	m	0.78159	m	0.869608
chr1	72290211	72290901	CGI353	43	0.943602	0.620408	490	8.77551			intergenic	0	0.00277778	0.00780423	0.00555556	0.00988419	0.00696864	f	0.794615	m	0.912453	m	0.642306
chr1	72301132	72301602	CGI354	20	0.802023	0.633333	270	7.40741			intergenic	0.00707014	0	0.00604575	0.0156863	0.00702435	0.00210084	m	0.589186	f	0.929919	m	0.642306
chr1	72330510	72331167	CGI355	29	0.651082	0.634573	457	6.34573	Pecr,Tmem169	"NM_023523","NM_175564"	exon	0.00309106	0.00447531	0.0116208	0.0107943	0.00917804	0	f	1	m	1	m	0.362292
chr1	72353788	72354557	CGI356	25	0.626734	0.530756	569	4.39367	Xrcc5	"NM_009533"	exon	0.00380117	0.00833333	0.00998221	0.00445402	0.00114943	0.00552608	f	1	m	0.805549	f	0.792288
chr1	72582531	72583961	CGI357	70	0.586862	0.623577	1230	5.69106	March4	"NM_001045533"	exon	0.0198533	0.011762	0.000868056	0.0148382	0.00404287	0.0047471	m	0.766267	f	0.379631	f	0.922114
chr1	72629672	72630188	CGI358	15	0.674475	0.53481	316	4.74684	Smarcal1	"NM_018817"	exon	0	0.0208333	0.0034965	0.0094697	0.00294118	0.00526316	f	0.545199	f	0.894742	f	1
chr1	72687163	72688074	CGI359	48	0.930138	0.540084	711	6.75105			intergenic	0.0797183	0.108694	0.0150915	0.00965743	0.0130312	0.00398936	f	0.658785	m	0.699315	m	0.128697
chr1	72757327	72758671	CGI360	84	0.960207	0.553322	1144	7.34266	Rpl37a	"NM_009084"	exon	0.00636885	0.00624077	0.00933853	0.00370915	0.00593414	0.0030772	m	1	m	0.742325	m	0.774231
chr1	72870504	72872336	CGI361	111	0.724681	0.619485	1632	6.80147	Igfbp2	"NM_008342"	exon	0.0122691	0.00839694	0.00460615	0.0044432	0.00782339	0.000754148	m	0.767305	m	0.895631	m	0.248856
chr1	72908839	72909278	CGI362	17	0.81002	0.594142	239	7.11297	Igfbp5	"NM_010518"	exon	0.13539	0.1423	0.003663	0.0139002	0.0180556	0	f	1	f	0.630133	m	0.354356
chr1	72916687	72917228	CGI363	13	0.465164	0.583578	341	3.81232	Igfbp5	"NM_010518"	intron	0	0	0.00560224	0.0031746	0.00340136	0.00584795	-	NA	m	1	f	1
chr1	72918211	72918846	CGI364	23	0.765793	0.533333	435	5.28736	Igfbp5	"NM_010518"	intron	0.00492424	0.0165004	0.0152902	0	0.003125	0	f	0.658785	m	0.413688	m	0.642306
chr1	72920009	72921437	CGI365	66	0.641487	0.579805	1228	5.37459	Igfbp5	"NM_010518"	exon	0.00272447	0.00419638	0.0120796	0.0102226	0.00222965	0.00163934	f	0.923631	m	0.787741	m	0.844402
chr1	73953636	73954311	CGI366	29	0.857289	0.553684	475	6.10526			intergenic	0.227707	0.364044	0.012963	0.00238095	0.00960317	0.00765386	f	0.0878089	m	0.895631	m	1
chr1	73960965	73961350	CGI367	11	0.655788	0.605405	185	5.94595	Tns1	"NM_027884"	exon	0.0751035	0.0193818	0	0.030037	0.0505952	0	m	0.461663	f	0.201468	m	0.113522
chr1	74083302	74084070	CGI368	33	0.521064	0.669014	568	5.80986	Tns1	"NM_027884"	intron	0.00480085	0.00892857	0.0015015	0.0015015	0.010876	0.00339163	f	0.912265	-	1	m	0.651177
chr1	74114530	74115721	CGI369	51	0.521589	0.633703	991	5.14632	Tns1	"NM_027884"	exon	0.00970921	0.0174962	0.00499413	0.0133345	0.0176587	0.00163666	f	0.887232	f	0.791816	m	0.319535
chr1	74144637	74145760	CGI370	58	0.605656	0.644637	923	6.28386	Tns1	"NM_027884"	intron	0.00761763	0.00410247	0.00433761	0.00614003	0.00569384	0.00290038	m	0.934836	f	0.935107	m	0.690358
chr1	74170568	74171916	CGI371	90	0.690837	0.674216	1148	7.83972	Tns1	"NM_027884"	exon	0.00343813	0.00708031	0.00873576	0.00151231	0.00788676	0.00802593	f	0.931803	m	0.526411	f	0.940421
chr1	74238664	74239324	CGI372	19	0.599688	0.528261	460	4.13043	Cxcr1	"NM_178241"	exon	0.193208	0.17513	0.0109518	0.0193237	0.009196	0.0190154	m	0.906077	f	0.915172	f	0.988643
chr1	74282530	74284038	CGI373	109	0.799809	0.649083	1308	8.33333	Arpc2	"NM_029711"	exon	0.0102483	0.0079953	0.00647995	0.00423844	0.0100618	0.00725726	m	0.79833	m	0.6724	m	0.826129
chr1	74330677	74332173	CGI374	82	0.684037	0.615741	1296	6.32716	Aamp,Pnkd	"NM_001190444,NM_146110","NM_025580,NM_001039509"	exon	0.0100407	0.0100754	0.00521981	0.00372383	0.00119048	0.00645933	f	0.902406	m	1	f	0.473779
chr1	74350138	74351037	CGI375	58	0.714111	0.685265	699	8.29757	Pnkd,Tmbim1	"NM_001039509","NM_027154"	exon	0.0102354	0.00701785	0.0126671	0.00511355	0.0101128	0.00134409	m	0.821377	m	0.893081	m	0.21924
chr1	74378783	74379553	CGI376	44	0.727243	0.652632	570	7.7193	Pnkd	"NM_001039509,NM_019999"	exon	0.00347939	0.0036169	0.00455359	0.0077178	0.014203	0.0127913	f	0.932069	f	0.889456	m	0.559464
chr1	74414663	74415833	CGI377	56	0.806479	0.541237	970	5.7732	Gm216	"NM_001033345"	exon	0.147225	0.136138	0.00610888	0.00489642	0.00865079	0.00165289	m	0.944793	m	0.882357	m	0.29722
chr1	74433188	74433759	CGI378	20	0.5141	0.652291	371	5.39084			intergenic	0	0.00434783	0.00695652	0.00197628	0.00362319	0.00395257	f	0.794615	m	1	f	1
chr1	74436151	74436938	CGI379	34	0.695231	0.579216	587	5.79216			intergenic	0.0126564	0.0145455	0.00834416	0.00322917	0.00706229	0.00574981	f	0.961203	m	0.902922	m	1
chr1	74437764	74439494	CGI380	131	0.723087	0.688889	1530	8.56209	Ctdsp1	"NM_153088"	exon	0.00910357	0.00211864	0.0137039	0.0117495	0.000983796	0.00356125	m	0.0793279	m	0.963249	f	1
chr1	74440295	74440732	CGI381	8	0.401695	0.586498	237	3.37553	Ctdsp1	"NM_153088"	exon	0.092201	0.178055	0.0158385	0.0434314	0.179798	0.00714286	f	0.399662	f	0.78159	m	0.00320364
chr1	74441120	74441680	CGI382	16	0.54527	0.572222	360	4.44444	Ctdsp1	"NM_153088"	exon	0.0833997	0.151962	0.0306926	0.020499	0.396937	0.00502646	f	0.271358	m	1	m	2.43808e-06
chr1	74441931	74442344	CGI383	8	0.448295	0.58216	213	3.75587	Ctdsp1	"NM_153088"	exon	0.168064	0.0841622	0.00886144	0.00868242	0.197055	0	m	0.446192	m	0.966411	m	0.000114362
chr1	74443763	74444567	CGI384	40	0.656754	0.635762	604	6.62252	Ctdsp1	"NM_153088"	exon	0.0108225	0.0069378	0.00612624	0	0.0105866	0.00337838	m	0.835307	m	0.500399	m	0.590841
chr1	74551785	74553591	CGI385	123	0.815353	0.613325	1606	7.65878	Rqcd1,Usp37	"NM_021383","NM_176972"	exon	0.00939825	0.00369642	0.00469103	0.00437944	0.00523604	0.00455709	m	0.446291	m	0.894742	m	0.809624
chr1	74633896	74635239	CGI386	75	0.686648	0.619423	1143	6.56168	Bcs1l,Zfp142	"NM_025784","NM_029888"	exon	0.00465893	0.0038591	0.0110929	0.00567818	0.00967998	0.0101318	m	0.875182	m	0.58402	f	0.842466
chr1	74647384	74648231	CGI387	38	0.679584	0.588872	647	5.87326	Rnf25,Stk36	"NM_021313","NM_175031"	exon	0.00726271	0.00954212	0.00560606	0.00199843	0.00637276	0.00535714	f	1	m	0.902922	m	0.77753
chr1	74707913	74708880	CGI388	67	0.841446	0.647979	767	8.73533	Ttll4	"NM_001014974"	exon	0.0214327	0.0137756	0.00741234	0	0.00885831	0.00675847	m	0.854207	m	0.401495	m	0.674314
chr1	74759999	74760614	CGI389	26	0.655043	0.619277	415	6.26506	Cyp27a1	"NM_024264"	exon	0.0248477	0.0101533	0.00195312	0.00223214	0.00195312	0	m	0.68997	f	1	m	0.642306
chr1	74795075	74795750	CGI390	28	0.663649	0.597895	475	5.89474	Prkag3	"NM_153744"	exon	0.015173	0.0108225	0.00464744	0.0126567	0.00208333	0	m	0.789996	f	0.785477	m	0.642306
chr1	74817584	74819310	CGI391	107	0.675787	0.653997	1526	7.0118	Wnt6	"NM_009526"	exon	0.0121811	0.00879892	0.0133858	0.0103313	0.00309536	0.00647334	m	0.810271	m	1	f	0.818777
chr1	74828656	74829816	CGI392	44	0.511492	0.605208	960	4.58333	Wnt6	"NM_009526"	exon	0.0180816	0.0312357	0.0135944	0.00348389	0.0139736	0	f	0.636675	m	0.512443	m	0.0624545
chr1	74830199	74831496	CGI393	79	0.753951	0.62443	1097	7.20146	Wnt6	"NM_009526"	exon	0.015309	0.00491717	0.00471291	0.00489288	0.00735396	0.00499297	m	0.305298	f	0.939854	m	0.768771
chr1	74837716	74839040	CGI394	61	0.488344	0.671708	1124	5.42705	Wnt10a	"NM_009518"	exon	0.00573477	0.0204906	0.0111962	0.0133431	0.00157233	0.00420168	f	0.793836	f	1	f	0.793653
chr1	74840646	74841902	CGI395	46	0.478319	0.617424	1056	4.35606	Wnt10a	"NM_009518"	intron	0.00669643	0.0181078	0.00382653	0.00640152	0	0.00181159	f	0.784892	f	0.833599	f	0.642306
chr1	74846900	74847680	CGI396	36	0.652974	0.617241	580	6.2069	Wnt10a	"NM_009518"	exon	0.00881944	0.00277778	0.0101619	0.0051322	0.0150718	0.00192308	m	0.582465	m	0.917984	m	0.364658
chr1	74849467	74850610	CGI397	56	0.608332	0.626723	943	5.93849	Wnt10a	"NM_009518"	exon	0.00421546	0.00790766	0.0034399	0.00377462	0.00882717	0.00386455	f	0.794615	f	0.941068	m	0.480598
chr1	74853491	74853967	CGI398	19	0.630912	0.663043	276	6.88406			intergenic	0.0170455	0.0340136	0.0042735	0.00584795	0.00294118	0	f	0.90087	f	1	m	0.724118
chr1	74863306	74863989	CGI399	30	0.694208	0.604555	483	6.21118			intergenic	0.00263871	0.018082	0.0132286	0.00884481	0.00545728	0	f	0.545199	m	0.859257	m	0.26134
chr1	74900934	74903284	CGI400	191	0.793839	0.670698	2150	8.88372	Cdk5r2	"NM_009872"	exon	0.01063	0.00797438	0.00976873	0.00913945	0.00401867	0.00282132	m	0.906077	m	0.720292	m	0.288416
chr1	74903726	74904117	CGI401	16	0.883037	0.628272	191	8.37696	Cdk5r2	"NM_009872"	exon	0	0.0206551	0.0337977	0.0127273	0	0	f	0.545199	m	0.973658	-	NA
chr1	74904562	74905787	CGI402	51	0.66202	0.553171	1025	4.97561			intergenic	0.0131392	0.0114805	0.00796426	0.00602176	0.00568529	0.00843542	m	0.817049	m	0.781266	f	1
chr1	74928217	74929899	CGI403	97	0.727947	0.605263	1482	6.54521	Fev	"NM_153111"	exon	0.00446699	0.00752708	0.0060881	0.00468012	0.0108975	0.0053126	f	0.793505	m	1	m	0.424588
chr1	74930844	74932687	CGI404	109	0.66104	0.637249	1643	6.63421	Fev	"NM_153111"	exon	0.00228295	0.00773379	0.0050919	0.00200893	0.0068784	0.00552993	f	0.782208	m	0.591841	m	0.821598
chr1	74939138	74940373	CGI405	55	0.608586	0.591304	1035	5.31401	Cryba2	"NM_021541"	exon	0.00715441	0.00748209	0.0102699	0.0053627	0.0105978	0.00439534	f	0.96967	m	0.78159	m	0.535238
chr1	74946855	74947894	CGI406	64	0.665101	0.678188	839	7.62813	Mir375	"NR_029876"	exon	0.0156682	0.00901361	0.0106194	0.00723952	0.00226757	0.00829872	m	0.835774	m	0.939652	f	0.642306
chr1	74994343	74995308	CGI407	41	0.563145	0.619608	765	5.35948	Ihh	"NM_010544"	exon	0.0123248	0.0185514	0.0155348	0.0196717	0.030995	0.00525526	f	0.824456	f	0.896398	m	0.303848
chr1	74996172	74999042	CGI408	198	0.697965	0.65206	2670	7.41573	Ihh	"NM_010544"	exon	0.0135062	0.0120527	0.00679457	0.00853572	0.015292	0.00684524	m	0.950776	f	0.685355	m	0.0228332
chr1	75121014	75122044	CGI409	54	0.757752	0.592771	830	6.50602	Nhej1	"NM_029342"	exon	0.0107443	0.00849598	0.0089328	0.00690806	0.0121941	0.00269941	m	0.971234	m	0.863367	m	0.362069
chr1	75137781	75138741	CGI410	60	0.819941	0.621053	760	7.89474	Cnppd1	"NM_026977"	exon	0.0136004	0.0124029	0.0109228	0.00250627	0.00755534	0.0042983	m	0.743924	m	0.637525	m	0.642508
chr1	75138709	75140186	CGI411	99	0.784487	0.629601	1277	7.75255	Cnppd1,Fam134a	"NM_026977","NM_170755"	exon	0.00533241	0.00754479	0.00999559	0.00675023	0.00718721	0.00640789	f	0.948424	m	0.927131	m	0.675367
chr1	75164933	75166001	CGI412	58	0.713102	0.619816	868	6.68203	Zfand2b	"NM_001159906,NM_001159905,NM_026846"	exon	0.00203377	0.013862	0.00416341	0.00136612	0.00392276	0.00587002	f	0.369052	m	0.78159	f	0.909339
chr1	75176171	75177244	CGI413	50	0.592985	0.623139	873	5.72738	Abcb6	"NM_023732"	exon	0.00818903	0.00941263	0.00273619	0.00419048	0.00487079	0.00219907	f	0.950776	f	1	m	0.753327
chr1	75187880	75189458	CGI414	78	0.610648	0.609579	1378	5.66038	Ankzf1,Atg9a	"NM_026187,NR_051999,NM_001267620,NR_051998","NM_001003917"	exon	0.00721154	0.0065587	0.0133073	0.0119925	0.00317931	0.00505444	m	0.903753	m	0.822439	f	0.642306
chr1	75205626	75206266	CGI415	20	0.573662	0.563636	440	4.54545	Glb1l	"NM_029010"	exon	0.0163654	0.0175232	0.003125	0.0093936	0.00173611	0.00347222	f	0.794615	f	0.680112	f	1
chr1	75207160	75208010	CGI416	43	0.682858	0.623077	650	6.61538	Glb1l,Stk16	"NM_029010","NM_011494"	exon	0.00861799	0.00533333	0.00499465	0.00565777	0.00777866	0.00989229	m	0.865689	f	0.88541	f	0.861963
chr1	75214972	75216900	CGI417	105	0.672763	0.601273	1728	6.07639	A630095N17Rik,Tuba4a	"NM_001243091,NM_001243090","NM_009447"	exon	0.0074122	0.013772	0.0126946	0.00433583	0.00342462	0.007249	f	0.794615	m	0.498755	f	0.780419
chr1	75232651	75233788	CGI418	65	0.675195	0.641409	937	6.93703	Dnajb2	"NM_020266,NM_001159884,NM_178055,NM_001159883,NM_001159885"	exon	0.00543346	0.00627595	0.00502646	0.00642792	0.00604396	0.00691472	f	0.851562	f	0.837294	f	0.875964
chr1	75248091	75248704	CGI419	20	0.525551	0.610169	413	4.84262	Ptprn	"NM_008985"	exon	0.0368729	0.00427632	0.00208333	0.0153187	0.00509907	0.00347222	m	0.68997	f	0.6724	m	0.820836
chr1	75259970	75260971	CGI420	49	0.674575	0.632959	801	6.11735	Ptprn	"NM_008985"	exon	0.0159596	0.00858452	0.00451548	0.00694444	0.0134909	0.00631681	m	1	f	0.928377	m	0.711028
chr1	75274666	75275039	CGI421	11	0.815884	0.560694	173	6.35838	Resp18	"NM_009049"	exon	0.00490196	0.019503	0.00910364	0.00653595	0.0171123	0.00183824	f	0.658785	m	0.906921	m	0.612534
chr1	75312979	75314868	CGI422	126	0.794647	0.625222	1689	7.46004	Dnpep	"NM_001110831,NM_016878"	exon	0.0192347	0.00835039	0.00987726	0.00710594	0.00902411	0.00433843	m	0.565244	m	0.756108	m	0.354356
chr1	75356650	75358015	CGI423	85	0.704803	0.643777	1165	7.29614	Des	"NM_010043"	exon	0.0172984	0.00497505	0.00455283	0.00454516	0.0123751	0.00465686	m	0.283045	m	0.95411	m	0.397126
chr1	75365992	75366562	CGI424	20	0.720673	0.554054	370	5.40541	Gm15179	"NR_037976"	exon	0.0703055	0.0599195	0.0048913	0.0259922	0.0159044	0.00543478	m	0.923503	f	0.676702	m	0.491324
chr1	75371699	75372592	CGI425	49	0.59474	0.691198	693	7.07071	Speg	"NM_007463"	exon	0.0103641	0.0089122	0.0138097	0.0148718	0.00309524	0	m	0.944793	f	0.922209	m	0.490511
chr1	75378093	75379382	CGI426	76	0.601965	0.681359	1089	6.97888	Speg	"NM_007463,NM_001085371"	exon	0.00245726	0.00684932	0.010774	0.015677	0.0150151	0.00487805	f	0.943663	f	0.997042	m	0.55425
chr1	75381148	75382077	CGI427	35	0.476733	0.63786	729	4.8011	Speg	"NM_007463,NM_001085371"	exon	0.17682	0.142337	0.0115972	0.00384615	0.0545735	0.00328947	m	0.758293	m	0.6724	m	0.000226385
chr1	75384080	75385930	CGI428	119	0.65734	0.66303	1650	7.21212	Speg	"NM_007463,NM_001085371,NM_001085370"	exon	0.00876172	0.0100181	0.00550121	0.0102948	0.0031002	0.00433723	f	0.999985	f	0.777684	f	1
chr1	75418370	75420303	CGI429	126	0.635549	0.676861	1733	7.27063	Speg	"NM_007463,NM_001085370"	exon	0.00300238	0.0112942	0.0139198	0.00718483	0.00693526	0.00299666	f	0.669449	m	0.620763	m	0.370878
chr1	75432283	75432928	CGI430	23	0.701357	0.550562	445	5.16854	Gmppa	"NM_133708"	exon	0.00238949	0.00988583	0	0.0131885	0.00923913	0.00821429	f	0.898371	f	0.410625	m	0.71793
chr1	75442321	75442719	CGI431	11	0.660947	0.590909	198	5.55556			intergenic	0	0.00769231	0.0153846	0	0.0363248	0	f	0.795257	m	0.6724	m	0.480598
chr1	75445557	75446033	CGI432	15	0.546718	0.634058	276	5.43478			intergenic	0	0	0	0	0.0758242	0	-	NA	-	NA	m	0.266772
chr1	75446700	75447501	CGI433	35	0.538821	0.658902	601	5.82363	Accn4	"NM_183022"	exon	0.00452447	0.0125927	0.00590112	0.00328947	0.00587862	0.00610501	f	0.809227	m	0.78159	f	0.884249
chr1	75454831	75455551	CGI434	34	0.603422	0.659615	520	6.53846	Accn4	"NM_183022"	intron	0.0125826	0.0138765	0.001287	0.0106026	0.00836884	0.0021978	f	0.945922	f	0.58402	m	0.491324
chr1	75472348	75472864	CGI435	21	0.667375	0.632911	316	6.64557	Chpf	"NM_001001566,NM_001001565"	exon	0.181346	0.182845	0.0439361	0.0474148	0.0031348	0.00529101	f	1	f	0.999979	f	1
chr1	75473699	75474505	CGI436	33	0.5951	0.605611	606	5.44554	Chpf	"NM_001001566,NM_001001565"	exon	0.0339758	0.0391674	0.00859785	0.00511983	0	0.00138889	f	0.867749	m	0.92472	f	0.642306
chr1	75475044	75476706	CGI437	128	0.709194	0.703146	1462	8.75513	Chpf,Tmem198	"NM_001001566,NM_001001565","NM_177056"	exon	0.00605159	0.0068407	0.00670134	0.00454823	0.00335775	0	f	0.565244	m	0.78159	m	0.48178
chr1	75479129	75479754	CGI438	26	0.530514	0.68	425	6.11765	Tmem198	"NM_177056"	exon	0.0367792	0.0135521	0.0055914	0.00583717	0.0274261	0.00888889	m	0.429481	f	1	m	0.287431
chr1	75483118	75484981	CGI439	101	0.650806	0.612147	1663	6.07336	Obsl1	"NM_178884"	exon	0.012272	0.00598571	0.0095105	0.00329404	0.0203397	0.00419946	m	0.895042	m	0.6724	m	0.0219077
chr1	75489400	75489783	CGI440	9	0.457725	0.661202	183	4.91803	Obsl1	"NM_178884"	exon	0.0077381	0.0467291	0	0.0364819	0.00892857	0.0075188	f	0.372989	f	0.58402	m	0.837533
chr1	75500028	75500693	CGI441	30	0.71418	0.602151	465	6.45161	Obsl1	"NM_178884"	exon	0.0519304	0.0523141	0.0190992	0.0103472	0.022866	0	f	1	m	0.720292	m	0.0456784
chr1	75501595	75503394	CGI442	148	0.80046	0.681051	1599	9.25578	Obsl1	"NM_178884"	exon	0.00897293	0.0059569	0.00861591	0.0032577	0.00564021	0.00327932	m	0.811416	m	0.526516	m	0.480598
chr1	75506055	75506667	CGI443	21	0.502844	0.645631	412	5.09709	Inha	"NM_010564"	exon	0.0976745	0.0489425	0.0163836	0.012878	0	0.00900072	m	0.629893	m	0.935524	f	0.354356
chr1	75517879	75518675	CGI444	44	0.855359	0.588926	596	7.38255	Stk11ip	"NM_027886"	exon	0.0015528	0.00362319	0.00549744	0.00332226	0.00542483	0.00712444	f	1	m	0.787615	f	0.711994
chr1	75542488	75543597	CGI445	63	0.615962	0.676568	909	6.93069	Slc4a3	"NM_009208"	exon	0.00839054	0.0142023	0.0156128	0.00396825	0.0124957	0.00107759	f	0.858564	m	0.6724	m	0.226538
chr1	75651044	75651460	CGI446	13	0.7845	0.555556	216	6.01852			intergenic	0.226496	0.159897	0.0119048	0.0109771	0	0.00666667	m	0.561557	m	1	f	0.642306
chr1	77509886	77510589	CGI447	27	0.638876	0.580517	503	5.36779	Epha4	"NM_007936"	intron	0.0123454	0.00832287	0.0031348	0.00961538	0.0119732	0.0211735	m	0.913689	f	0.78159	f	0.818814
chr1	77510546	77512539	CGI448	104	0.687471	0.582264	1793	5.80033	Epha4	"NM_007936"	exon	0.00544819	0.00491955	0.00699236	0.00735888	0.00811252	0.0100575	m	0.898485	f	0.978137	f	0.80615
chr1	77512555	77513578	CGI449	42	0.65522	0.558931	823	5.10328			intergenic	0.014738	0.00807292	0.0090368	0.00238095	0.00208333	0.00340388	m	0.745396	m	0.904065	f	0.642306
chr1	78078244	78078735	CGI450	15	0.784956	0.525773	291	5.15464			intergenic	0.0803359	0.125229	0	0.015625	0.0108687	0	f	0.598438	f	0.822135	m	0.257281
chr1	78186022	78186789	CGI451	43	0.73161	0.652557	567	7.58377	Pax3	"NM_008781,NM_001159520"	intron	0.0256858	0	0.0107318	0.0101974	0.0103636	0.00348432	m	0.257865	m	0.955417	m	0.462186
chr1	78191686	78192118	CGI452	13	0.65635	0.586207	232	5.60345	Pax3	"NM_008781,NM_001159520"	exon	0.00952381	0	0.00529101	0.0154762	0	0.003663	m	0.794615	f	0.894741	f	0.642306
chr1	78192752	78194021	CGI453	67	0.689798	0.604303	1069	6.26754	Pax3	"NM_008781,NM_001159520"	exon	0.0149673	0.00704198	0.0060857	0.00879085	0.00725265	0.00715951	m	0.756247	f	0.796146	m	0.864591
chr1	78197943	78198602	CGI454	20	0.536884	0.572985	459	4.3573			intergenic	0.0272031	0.00976801	0.0139087	0.00522102	0.00588235	0.00877193	m	0.658785	m	0.799188	f	1
chr1	78200125	78200881	CGI455	32	0.850709	0.543165	556	5.7554			intergenic	0.00662573	0.0049682	0.0091712	0.0027027	0.0147378	0	m	1	m	0.868045	m	0.0898998
chr1	78212352	78214912	CGI456	197	0.792856	0.649153	2360	8.34746			intergenic	0.00844907	0.0101684	0.00416782	0.00750082	0.00633237	0.00369536	f	0.673979	f	0.685969	m	0.78661
chr1	78306443	78307688	CGI457	80	0.773591	0.631579	1045	7.6555	Sgpp2	"NM_001004173"	exon	0.00764878	0.00235944	0.00727251	0.00830835	0.00954937	0.00611537	m	0.658785	f	0.945643	m	0.596669
chr1	78484817	78485679	CGI458	51	0.862755	0.599698	662	7.70393	Farsb	"NM_011811"	exon	0.00467172	0.00389477	0.0053617	0.00801227	0.00422799	0.00123457	m	1	f	0.895631	m	0.642306
chr1	78508187	78508834	CGI459	24	0.570794	0.621924	447	5.36913	Mogat1	"NM_026713"	exon	0.0104444	0.010303	0.00666667	0.00210526	0.00266667	0.0069697	m	1	m	1	f	0.790545
chr1	78534046	78534589	CGI460	12	0.427333	0.580175	343	3.49854	Mogat1	"NM_026713"	exon	0.0671331	0.0687831	0.0287582	0.0121832	0.0419597	0	f	0.937239	m	0.904947	m	0.0319715
chr1	78653969	78655304	CGI461	125	0.889474	0.706608	1135	11.0132	Acsl3,Utp14b	"NM_001136222,NM_028817,NM_001033606","NM_001001981,NM_001136226"	exon	0.00518613	0.00426509	0.00404823	0.00331946	0.00353423	0.0035002	m	0.9122	m	0.940735	m	0.814602
chr1	79436458	79436813	CGI462	12	0.825431	0.619355	155	7.74194	Scg2	"NM_009129"	exon	0.00989011	0	0	0	0.00444444	0	m	0.658785	-	NA	m	0.642306
chr1	79446880	79447240	CGI463	7	0.602053	0.55	160	4.375			intergenic	0.0262605	0	0.0102041	0.0102041	0.00707384	0	m	0.545199	-	1	m	0.480598
chr1	79667993	79669077	CGI464	54	0.660449	0.623303	884	6.1086	Ap1s3	"NM_183027"	exon	0.00859005	0.00609504	0.00639063	0.0146259	0.0094964	0	m	0.843338	f	0.92472	m	0.193548
chr1	79757327	79757786	CGI465	8	0.425538	0.583012	259	3.0888	Wdfy1	"NM_001111279,NM_027057"	intron	0.00757576	0	0.0183655	0	0.010101	0	m	0.798187	m	0.6724	m	0.644608
chr1	79757665	79758669	CGI466	66	0.861425	0.619403	804	8.20896	Wdfy1	"NM_001111279,NM_027057"	exon	0.00672303	0.00641822	0.0025379	0.00487533	0.00310559	0.0112975	m	0.794615	f	0.6724	f	0.442325
chr1	79772385	79773126	CGI467	38	0.716934	0.626617	541	7.02403	Mrpl44	"NM_001081210"	exon	0.005	0.00166667	0.00838018	0.0104235	0.0113753	0.00208333	m	1	f	0.979604	m	0.378093
chr1	79854541	79855965	CGI468	106	0.776258	0.668301	1224	8.66013	Serpine2	"NM_009255"	exon	0.00760375	0.0039016	0.00720131	0.00717142	0.0180512	0.0101881	m	0.586072	m	0.976556	m	0.717342
chr1	80196614	80196970	CGI469	9	0.783292	0.544872	156	5.76923	Fam124b	"NM_173425"	exon	0.256495	0.244184	0.00340136	0.0154762	0.00841544	0.0167092	m	0.945203	f	0.891423	f	0.929254
chr1	80336112	80337924	CGI470	173	0.897293	0.706576	1612	10.732	Cul3	"NM_016716"	exon	0.0126674	0.0150098	0.00924391	0.00879275	0.00197573	0.00309658	f	0.998399	m	0.833107	f	1
chr1	80380743	80381205	CGI471	9	0.384259	0.599237	262	3.43511			intergenic	0.177539	0.217277	0.0226636	0	0.002457	0	f	0.87869	m	0.49563	m	0.644608
chr1	80754379	80755559	CGI472	88	0.806729	0.672449	980	8.97959	Dock10	"NM_175291"	exon	0.00521637	0.00815747	0.00813984	0.0021645	0.00763889	0.00347985	f	1	m	0.694118	m	1
chr1	82279646	82280204	CGI473	27	0.684684	0.664804	358	7.5419	Irs1	"NM_010570"	intron	0.0245053	0.00631988	0.0212934	0.00568182	0.00497835	0	m	0.642002	m	0.534011	m	0.362499
chr1	82285249	82288683	CGI474	201	0.621104	0.632962	3234	6.21521	Irs1	"NM_010570"	exon	0.0763284	0.0549012	0.0115625	0.00502193	0.00989353	0.00708816	m	0.658785	m	0.315042	m	0.298606
chr1	82312646	82313715	CGI475	71	0.88349	0.61565	869	8.17031	Rhbdd1	"NM_029777"	exon	0.0189999	0.0194684	0.0106392	0.0093221	0.00857573	0.00444744	f	0.794615	m	0.978671	m	0.691087
chr1	82583045	82584080	CGI476	41	0.499913	0.628743	835	4.91018	Col4a3,Col4a4	"NM_007734","NM_007735"	exon	0.0158185	0.00411449	0.00680113	0.00491071	0.00786119	0.00193798	m	0.642002	m	1	m	0.642306
chr1	82721205	82722341	CGI477	64	0.852231	0.571581	936	6.83761	Mff	"NM_029409"	exon	0.0154947	0.0112103	0.00658987	0.00712325	0.0080463	0.0075869	m	0.794615	f	0.895631	m	0.905549
chr1	82835529	82837085	CGI478	129	0.839503	0.679204	1356	9.51327	Agfg1	"NM_010472"	exon	0.0111795	0.00996864	0.00692641	0.00548204	0.00202257	0.00601093	m	0.861237	m	0.956086	f	0.537829
chr1	83001005	83001401	CGI479	11	0.691908	0.571429	196	5.61224			intergenic	0.128456	0.307839	0.0111111	0.0047619	0.0237387	0	f	0.134472	m	1	m	0.163655
chr1	83034610	83035056	CGI480	13	0.621334	0.585366	246	5.28455	Slc19a3	"NM_030556"	exon	0.0173407	0	0.00333333	0	0.00769231	0.0176407	m	0.431147	m	0.78159	f	0.642306
chr1	83156133	83156599	CGI481	13	0.572025	0.586466	266	4.88722	Wdr69	"NR_027636,NM_027725"	exon	0.0196078	0.0181373	0.00392157	0.022409	0.0020284	0	m	0.952896	f	0.893081	m	0.642306
chr1	83404353	83404984	CGI482	18	0.506253	0.575406	431	4.17633	Sphkap	"NM_172430"	exon	0	0	0.00227273	0.018648	0.00738636	0.0034965	-	NA	f	0.894742	m	0.806753
chr1	84280473	84281561	CGI483	53	0.622747	0.620495	888	5.96847	Pid1	"NM_001003948"	exon	0.00871212	0.00793651	0.00417175	0.00549451	0.00280112	0	m	1	f	1	m	0.642306
chr1	84691702	84693128	CGI484	89	0.691268	0.652529	1226	7.25938	Dner,Mir5126	"NM_152915","NR_039588"	exon	0.00638167	0.0104604	0.00810667	0.00495093	0.00508411	0.00608568	f	0.928641	m	0.821527	f	1
chr1	84834803	84837087	CGI485	172	0.816352	0.65739	2084	8.25336	Fbxo36,Trip12	"NM_025386","NM_133975"	exon	0.00833871	0.00612745	0.0100456	0.0033077	0.0139129	0.00148148	m	0.66566	m	0.58402	m	0.0117093
chr1	84930714	84931830	CGI486	62	0.698384	0.626638	916	6.76856	Slc16a14	"NM_027921"	exon	0.00691623	0.0145695	0.00320346	0.00650151	0.00722042	0.00622849	f	0.937644	f	0.616176	m	0.895176
chr1	85268775	85269175	CGI487	5	0.316046	0.565	200	2.5			intergenic	0.327515	0.325037	0.0892507	0.137139	0.139715	0.151173	m	1	f	0.6724	f	1
chr1	85273448	85273829	CGI488	4	0.352042	0.502762	181	2.20994			intergenic	0.255154	0.280854	0.0476594	0.0731864	0.0744813	0.0607091	f	0.888775	f	0.612527	m	0.366709
chr1	87487723	87488597	CGI489	12	0.262988	0.534125	674	1.78042	Sp110	"NM_175397,NM_030194"	exon	0.399771	0.41283	0.190454	0.161984	0.23145	0.212448	f	0.961203	m	0.902733	m	0.958167
chr1	87488774	87489548	CGI490	10	0.300419	0.482578	574	1.74216	Sp110	"NM_175397,NM_030194"	intron	0.392673	0.378519	0.197237	0.183365	0.268004	0.190778	m	0.946286	m	0.986042	m	0.506252
chr1	87599907	87600484	CGI492	16	0.558814	0.572944	377	4.24403	Sp100	"NM_013673"	intron	0.00292398	0.0146199	0.0106326	0.0217981	0.00697168	0	f	0.770626	f	0.80634	m	0.480598
chr1	87689640	87691247	CGI493	150	0.956869	0.668799	1407	10.661	Cab39	"NM_133781"	exon	0.0115453	0.00905417	0.00928367	0.00814291	0.00508323	0.00528225	m	1	m	0.695759	f	0.642306
chr1	87790801	87791814	CGI494	56	0.771304	0.611316	813	6.88807	Itm2c	"NM_022417"	exon	0.0010582	0.00566406	0.0125455	0.0035754	0.00186404	0.00488054	f	0.794615	m	0.877407	f	0.806753
chr1	87792054	87792472	CGI495	12	0.67317	0.573394	218	5.50459	Itm2c	"NM_022417"	intron	0.0133185	0.0217803	0.00793651	0.00520833	0.0110577	0.0193015	f	0.955687	m	0.908008	f	0.823908
chr1	87914515	87915581	CGI496	60	0.710967	0.624711	866	6.92841			intergenic	0.0135518	0.0116251	0.0106538	0.00349327	0.00508778	0.00223214	m	0.871294	m	0.58402	m	0.487088
chr1	87942144	87943462	CGI497	112	0.907353	0.670841	1118	10.0179	2810459M11Rik	"NM_001144993,NM_001144992"	exon	0.00870111	0.00474039	0.00444776	0.00540196	0.00123383	0.00514156	m	0.47418	f	0.968016	f	0.514413
chr1	87943515	87944025	CGI498	17	0.797444	0.525806	310	5.48387	2810459M11Rik	"NM_001144993,NM_001144992"	intron	0.0157895	0.0124269	0.00404858	0.00292398	0.0037594	0	m	1	m	1	m	0.651374
chr1	87961001	87961833	CGI499	49	0.68858	0.674051	632	7.75316	Psmd1	"NM_027357"	exon	0.00636972	0.00437063	0.0063389	0.00886292	0.00756639	0	m	0.831968	f	0.928377	m	0.188022
chr1	88050934	88051749	CGI500	45	0.794978	0.60813	615	7.31707	Armc9	"NM_030184,NM_027456"	exon	0.00963457	0.00423351	0.00715516	0.00529655	0.00612686	0	m	0.841132	m	1	m	0.187145
chr1	88199390	88200853	CGI501	82	0.660991	0.627078	1263	6.49248	B3gnt7	"NM_145222"	exon	0.00216315	0.00176332	0.00268595	0.0100221	0.0102942	0.00432058	m	0.925524	f	0.6724	m	0.29258
chr1	88210051	88210748	CGI502	19	0.465468	0.575453	497	3.82294			intergenic	0.00953757	0.0289367	0.0162626	0.00307692	0.0045584	0.00285714	f	0.823602	m	0.6724	m	0.806753
chr1	88255027	88257010	CGI503	170	0.932275	0.640494	1783	9.53449	C130036L24Rik,Ncl	"NR_015507","NM_010880"	exon	0.00375775	0.00660783	0.00800256	0.00826914	0.00593906	0.00323274	f	0.946445	f	1	m	0.628598
chr1	88284036	88284696	CGI504	23	0.568589	0.595652	460	5	Nmur1	"NM_010341"	exon	0.127042	0.261949	0	0.00394737	0.0204709	0	f	0.0455272	f	0.6724	m	0.0228885
chr1	88324219	88324582	CGI505	9	0.567495	0.625767	163	5.52147	1700019O17Rik	"NM_027966"	exon	0.141725	0.107994	0.0031746	0.0190476	0.0261438	0	m	0.923455	f	0.89173	m	0.354356
chr1	88330692	88331619	CGI506	52	0.6525	0.662999	727	7.15268			intergenic	0.0119978	0.00323392	0.00893453	0.0103294	0.0183361	0.00759804	m	0.659031	f	1	m	0.642306
chr1	88338456	88339940	CGI507	106	0.800595	0.642523	1284	8.25545			intergenic	0.00617139	0.00864385	0.00872232	0.00623865	0.0108586	0.00931577	f	1	m	0.941369	m	0.863956
chr1	88368693	88369141	CGI508	20	0.685207	0.689516	248	8.06452			intergenic	0.0192599	0.0256416	0	0.00408497	0.00932161	0.00240385	f	0.814563	f	0.6724	m	0.409607
chr1	88383642	88384852	CGI509	96	0.965876	0.627723	1010	9.50495			intergenic	0.0103718	0.0024116	0.00787452	0.006047	0.00503786	0.00549165	m	0.270941	m	0.839086	f	1
chr1	88400186	88401404	CGI510	70	0.672418	0.640472	1018	6.87623			intergenic	0.00477994	0.00816722	0.0053884	0.00458533	0.00460316	0.00907136	f	0.937644	m	1	f	0.859005
chr1	88421227	88425621	CGI511	381	0.865425	0.648069	4194	9.08441	Ptma	"NM_008972"	exon	0.00690739	0.00512771	0.00656076	0.00685448	0.00751308	0.00489595	m	0.572194	f	0.996977	m	0.468241
chr1	88478521	88479536	CGI512	51	0.622231	0.646626	815	6.25767	Pde6d	"NM_008801"	exon	0.00207792	0.00545267	0.00268398	0.00908491	0.0131813	0.00488596	f	0.817049	f	0.699448	m	0.642508
chr1	88483433	88484334	CGI513	39	0.651471	0.584879	701	5.56348	Cops7b	"NM_172974"	exon	0.0101999	0.00829824	0.00143472	0.0104764	0.0028768	0.00162602	m	1	f	0.672562	m	0.808389
chr1	88565949	88567704	CGI514	101	0.688185	0.614791	1555	6.49518	Nppc	"NM_010933"	exon	0.0102318	0.013879	0.0109203	0.0106628	0.00786838	0.0056891	f	1	m	0.881185	m	0.544626
chr1	88599726	88600916	CGI515	78	0.796723	0.630303	990	7.87879	Dis3l2	"NM_001172157,NM_153530"	exon	0.00442852	0.00924806	0.00775906	0.00497205	0.00697392	0.00412698	f	0.794615	m	0.92472	m	0.642306
chr1	88983530	88984180	CGI516	25	0.597322	0.611111	450	5.55556	Alppl2	"NM_007433"	exon	0.190082	0.172565	0.0137529	0	0.0421183	0.0235043	m	0.956909	m	0.500399	m	0.273929
chr1	88995072	88995761	CGI517	28	0.589096	0.627812	489	5.72597	Alpi	"NM_001081082"	exon	0.0351864	0.0334031	0.0067221	0.00508309	0.00768049	0.00460829	m	0.950776	m	0.843781	m	0.806753
chr1	89023585	89024632	CGI518	46	0.589495	0.61039	847	5.43093	Akp3	"NM_007432"	exon	0.0256645	0.0231307	0.0124416	0.0084959	0.0121404	0.0037253	m	1	m	1	m	0.466958
chr1	89045858	89046237	CGI519	11	0.912471	0.541899	179	6.14525	Ecel1	"NM_021306"	exon	0.177577	0.1198	0.00642857	0.0156986	0.0332334	0.00549451	m	0.600982	f	1	m	0.349378
chr1	89049924	89051799	CGI520	138	0.792213	0.64597	1675	8.23881	Ecel1	"NM_021306"	exon	0.00958592	0.00464251	0.0100517	0.00796811	0.00422582	0.00125313	m	0.423745	m	0.898659	m	0.261318
chr1	89051877	89053268	CGI521	73	0.597408	0.642317	1191	6.1293			intergenic	0.00821974	0.00410456	0.0101958	0.00517504	0.00345564	0.00317824	m	0.862284	m	0.867121	m	1
chr1	89081074	89081734	CGI522	23	0.556795	0.6	460	5	Prss56	"NM_027084"	exon	0.0399774	0.0103175	0.00222222	0.00815851	0.0030303	0	m	0.439475	f	0.895631	m	0.658545
chr1	89082858	89083944	CGI523	63	0.708431	0.634312	886	7.11061	Prss56	"NM_027084"	exon	0.00531401	0.0021254	0.00858101	0.00894494	0.0063986	0.00236928	m	0.928179	f	1	m	0.817435
chr1	89102529	89103240	CGI524	22	0.521653	0.575342	511	4.30528	Chrng	"NM_009604"	exon	0.0189088	0.0309579	0.00975094	0.0028549	0.0026455	0.00617284	f	0.873352	m	1	f	1
chr1	89110041	89111301	CGI525	98	0.860639	0.656604	1060	9.24528	Eif4e2	"NM_023314,NM_001039170,NM_001039169"	exon	0.010183	0.00639645	0.00987597	0.0165703	0.0101463	0.0117898	m	0.951087	f	0.92472	f	0.877233
chr1	89154973	89155421	CGI526	12	0.49512	0.629032	248	4.83871			intergenic	0.0447915	0.0195275	0.00735294	0.00588235	0.00840336	0.0150148	m	1	m	1	f	0.642508
chr1	89160366	89161691	CGI527	82	0.744133	0.627556	1125	7.28889	Efhd1	"NM_028889"	exon	0.00394779	0.00136319	0.00533367	0.0068213	0.00332215	0.0111187	m	0.658785	f	0.939854	f	0.711469
chr1	89223095	89224421	CGI528	91	0.705378	0.680284	1126	8.08171	Gigyf2	"NM_146112,NM_001110212"	exon	0.0031362	0.00773457	0.00582656	0.00628407	0.00442965	0.00890815	f	0.921765	f	0.78159	f	0.823908
chr1	89371543	89372426	CGI529	36	0.541962	0.626647	683	5.27086	3110079O15Rik	"NM_028473"	exon	0.00749544	0.0143412	0.00211416	0.00211416	0.0178967	0	f	0.588426	-	1	m	0.367546
chr1	89405690	89407555	CGI530	137	0.752757	0.664264	1665	8.22823	Ngef	"NM_001111314,NM_019867"	exon	0.00855535	0.00693972	0.00909873	0.00697633	0.0079913	0.00749628	m	0.794615	m	1	m	0.651107
chr1	89504313	89504728	CGI531	9	0.585908	0.562791	215	4.18605			intergenic	0.27949	0.24868	0.0113636	0.00909091	0.0194234	0	m	0.911282	m	1	m	0.245462
chr1	89516987	89517362	CGI532	9	0.550018	0.617143	175	5.14286	Inpp5d	"NM_001110192,NM_001110193,NM_010566"	exon	0.20689	0.130969	0.0249369	0.00462963	0	0	m	0.666144	m	0.765088	-	NA
chr1	89652285	89653415	CGI533	91	1.05073	0.610753	930	9.78495	Atg16l1	"NM_001205392,NM_001205391,NM_029846"	exon	0.00979037	0.00698641	0.0133337	0.00752022	0.00579777	0.00162907	m	1	m	0.850795	m	0.37252
chr1	89749465	89750951	CGI534	119	0.79705	0.68196	1286	9.2535	Dgkd	"NM_177646"	exon	0.00842813	0.00494991	0.010021	0.00843215	0.010382	0.0067824	m	0.773364	m	0.75883	m	0.423545
chr1	89904503	89905313	CGI535	47	0.817242	0.622951	610	7.70492	Usp40	"NM_001198573,NM_001033291"	exon	0.017785	0.0103865	0.00971817	0.00510204	0	0.0120659	m	0.758977	m	0.926538	f	0.354356
chr1	90101618	90102717	CGI536	73	0.869497	0.611791	899	8.12013	Dnajb3,Ugt1a10,Ugt1a2,Ugt1a5,Ugt1a6a,Ugt1a6b,Ugt1a7c,Ugt1a9	"NM_008299","NM_201641","NM_013701","NM_201643","NM_145079","NM_201410","NM_201642","NM_201644"	exon	0.0593945	0.0346186	0.00917538	0.00539921	0.00299884	0.00545635	m	0.92614	m	0.764323	f	0.860746
chr1	90137793	90138303	CGI537	11	0.491669	0.545161	310	3.54839	Heatr7b1	"NM_001177364"	exon	0.229317	0.2805	0.0799496	0.0760994	0.0810703	0.039192	f	0.794615	m	0.901789	m	0.384243
chr1	90149369	90150276	CGI538	14	0.280452	0.54314	707	1.9802	Heatr7b1	"NM_001177364"	intron	0.23246	0.201638	0.0386175	0.0368091	0.262035	0.0346214	m	0.915946	m	0.848459	m	0.000343836
chr1	90151338	90151726	CGI539	7	0.37008	0.638298	188	3.7234	Heatr7b1	"NM_001177364"	exon	0.261555	0.245623	0.0466827	0.0750626	0.184954	0.0358366	m	1	f	0.722542	m	0.00138013
chr1	90173355	90174775	CGI540	59	0.692657	0.528689	1220	4.83607	A730008H23Rik,Hjurp	"NM_172505","NM_198652"	exon	0.0206209	0.0363791	0.00822807	0.00561268	0.00312386	0.00360525	f	0.895042	m	0.525324	f	0.858446
chr1	90174622	90175254	CGI541	12	0.417956	0.516204	432	2.77778			intergenic	0.255107	0.311576	0.00766891	0	0.0182627	0.0117068	f	0.96721	m	0.6724	m	0.642306
chr1	90182827	90183926	CGI542	22	0.360217	0.525028	899	2.44716			intergenic	0.230594	0.278111	0.0281706	0.0394772	0.0449778	0.022995	f	0.682941	f	0.955417	m	0.635557
chr1	90597236	90599437	CGI543	178	0.860764	0.644678	2001	8.89555	Arl4c	"NM_177305"	exon	0.00893843	0.00564495	0.00822913	0.00699326	0.00455995	0.000725498	m	0.261748	m	0.895631	m	0.0965407
chr1	90602323	90602811	CGI544	13	0.594469	0.552083	288	4.51389			intergenic	0.00555556	0.00666667	0	0.00277778	0.00442992	0.00640732	f	1	f	0.78159	f	1
chr1	90966385	90967976	CGI545	122	0.782095	0.670022	1391	8.77067	Sh3bp4	"NM_133816"	exon	0.00605146	0.00564304	0.00447059	0.00590753	0.00531099	0.00614035	m	0.755333	f	0.542748	f	0.686156
chr1	91199199	91199769	CGI546	19	0.658052	0.559459	370	5.13514			intergenic	0.118362	0.111634	0.00641026	0.00694444	0.0109836	0.00807441	m	1	f	1	m	0.642306
chr1	91350401	91352898	CGI547	219	0.902385	0.65172	2297	9.53418	Agap1	"NM_178119,NM_001037136"	exon	0.0137874	0.00681377	0.00554057	0.00657169	0.00280848	0.00700296	m	0.47422	f	0.800176	f	0.480598
chr1	91476367	91478797	CGI548	249	0.89712	0.70583	2230	11.1659	Agap1	"NM_178119,NM_001037136"	intron	0.00598562	0.010945	0.00718779	0.00651969	0.00732029	0.00614246	f	0.863713	m	0.708944	m	0.753942
chr1	91540603	91540976	CGI549	8	0.602618	0.560694	173	4.62428	Agap1	"NM_178119,NM_001037136"	intron	0.114669	0.160905	0.0290242	0	0.560731	0	f	0.777154	m	0.498755	m	0.000221582
chr1	91819338	91820353	CGI550	44	0.574594	0.629448	815	5.39877			intergenic	0.0127359	0.00973928	0.0132224	0.020015	0.0137987	0.00226757	m	1	f	0.78527	m	0.377379
chr1	91823406	91824290	CGI551	39	0.635831	0.599415	684	5.70175			intergenic	0.0145983	0.00130719	0.00467236	0.0084476	0.00359911	0.00405644	m	0.54973	f	0.859728	f	1
chr1	91825101	91825763	CGI552	28	0.696244	0.590909	462	6.06061	Gbx2	"NM_010262"	exon	0.0154591	0.0139824	0.00196078	0.0141165	0.0102456	0.0108543	m	0.964086	f	0.510753	f	0.86512
chr1	91826363	91828617	CGI553	187	0.851969	0.654333	2054	9.10419	Gbx2	"NM_010262"	exon	0.00937131	0.0092817	0.00629876	0.00385383	0.00743588	0.0042309	m	0.978134	m	0.749946	m	0.489004
chr1	91828510	91828992	CGI554	14	0.754964	0.51773	282	4.96454			intergenic	0	0.0031746	0.003663	0.0281591	0.00842491	0.00714286	f	0.794615	f	0.6724	m	1
chr1	91830236	91830619	CGI555	16	1.03592	0.584699	183	8.74317			intergenic	0.0025641	0.0173077	0.0042735	0.0042735	0.00174825	0	f	0.781714	-	1	m	0.642306
chr1	91836123	91836570	CGI556	7	0.468564	0.493927	247	2.83401			intergenic	0.0208259	0.0406355	0.0753279	0.0119048	0.0233391	0.00934256	f	0.899513	m	0.595671	m	0.478313
chr1	91836826	91837378	CGI557	20	0.543625	0.647727	352	5.68182			intergenic	0.00513285	0.00862398	0.00876872	0.00483092	0.0015528	0.0171857	f	0.9122	m	0.895631	f	0.480598
chr1	91838039	91839030	CGI558	52	0.753294	0.597977	791	6.57396			intergenic	0.0079194	0.00197205	0.00717239	0.0137033	0.00387931	0	m	0.644758	f	0.837343	m	0.494519
chr1	91864191	91865884	CGI559	115	0.842818	0.604823	1493	7.70261	Asb18	"NM_139152"	exon	0.018798	0.00748043	0.00970078	0.00987693	0.00516482	0.0107047	m	0.75125	f	0.986884	f	0.958315
chr1	91888344	91890000	CGI560	77	0.615412	0.590659	1456	5.28846	Asb18	"NM_139152"	exon	0.0466932	0.0278374	0.0121748	0.00842624	0.00829798	0.00582837	m	0.501802	m	0.933571	m	0.52643
chr1	91903130	91903563	CGI561	12	0.616341	0.579399	233	5.15021	Asb18	"NM_139152"	intron	0.195196	0.129748	0.011544	0.0228175	0.0414036	0.0111925	m	0.787537	f	0.987654	m	0.0966424
chr1	92100333	92100807	CGI562	12	0.51961	0.583942	274	4.37956	Cxcr7	"NM_001271607,NM_007722"	exon	0	0.0047619	0	0.0031746	0.0439361	0.0133333	f	0.794615	f	0.78159	m	0.38757
chr1	92118714	92119066	CGI563	10	0.978303	0.526316	152	6.57895			intergenic	0.159129	0.112055	0.00568182	0.00694444	0.436267	0	m	0.676842	f	1	m	8.05267e-05
chr1	92499592	92500529	CGI564	67	1.03189	0.598372	737	9.09091	Cops8	"NM_133805"	exon	0.00517764	0.00756059	0.00506269	0.00853791	0.00336765	0.0057971	f	1	f	0.78159	f	0.82751
chr1	92811338	92811830	CGI565	16	0.533522	0.643836	292	5.47945	Mlph	"NM_053015"	exon	0.0169591	0.010194	0	0.00297619	0.015392	0.0215803	m	0.92614	f	0.78159	f	0.760709
chr1	92824685	92825056	CGI566	8	0.460216	0.649123	171	4.67836	Mlph	"NM_053015"	exon	0.00911125	0.0110294	0.00416667	0.0113636	0.00446429	0	f	1	f	1	m	0.642306
chr1	92894745	92896168	CGI567	96	0.767399	0.6435	1223	7.84955	Lrrfip1	"NM_001111312"	exon	0.0183483	0.0120367	0.00959893	0.00717822	0.00877856	0.00453968	m	1	m	0.766062	m	0.362888
chr1	92948987	92950405	CGI568	80	0.658697	0.639573	1218	6.56814	Lrrfip1	"NM_001111312,NM_008515,NM_001111311"	exon	0.0105312	0.0131515	0.00279083	0.00224394	0.0108779	0.00760537	f	0.811783	m	0.958386	m	1
chr1	93041323	93041847	CGI569	16	0.582639	0.58642	324	4.93827	Rbm44	"NM_001033408"	exon	0.241909	0.267786	0.0265646	0.00645618	0.0242363	0.00454545	f	0.93348	m	0.67366	m	0.288521
chr1	93076098	93077111	CGI570	48	0.550466	0.655597	813	5.90406	Ramp1	"NM_016894,NM_178401,NM_001168392"	exon	0.0192282	0.00479016	0.00186741	0.00294118	0.0106327	0.00196078	m	0.666686	f	0.896804	m	0.296445
chr1	93146373	93147768	CGI571	105	0.837061	0.651046	1195	8.78661	Ube2f	"NM_026454"	exon	0.0109558	0.0097397	0.00980588	0.00934622	0.019884	0.00231481	m	0.758293	m	1	m	0.0797537
chr1	93194366	93195433	CGI572	64	0.752861	0.627451	867	7.38178	Scly	"NM_016717"	exon	0.00700066	0.00580891	0.00680605	0.0078503	0.00512821	0.0103909	m	1	f	1	f	0.622743
chr1	93240926	93242574	CGI573	113	0.677804	0.678867	1448	7.80387	Espnl	"NM_001033292"	exon	0.0227193	0.0410396	0.00327977	0.011954	0.00475671	0.00767957	f	0.843496	f	0.58402	f	0.817397
chr1	93262427	93263764	CGI574	73	0.649427	0.633245	1137	6.4204	Fam132b	"NM_173395"	exon	0.018131	0.0172699	0.00714028	0.009585	0.00706238	0.00541126	m	0.92277	f	0.949553	m	0.762123
chr1	93294440	93295831	CGI575	104	0.853363	0.640638	1191	8.73216	Ilkap	"NM_023343"	exon	0.00588195	0.00652588	0.00795587	0.00820757	0.00527192	0.00308278	f	0.951724	f	0.922209	m	0.482747
chr1	93302332	93302868	CGI576	18	0.545018	0.627976	336	5.35714	1700020N18Rik	"NR_026924"	exon	0.00954545	0.0797912	0.0758028	0.0195833	0.0262517	0	f	0.0206679	m	0.239126	m	0.0532654
chr1	93308459	93311238	CGI577	159	0.640169	0.625048	2579	6.16518	Hes6	"NM_019479"	exon	0.0126255	0.0150563	0.00692859	0.00744317	0.00700691	0.00670808	f	0.908921	f	0.95262	m	0.656995
chr1	93355054	93356598	CGI578	108	0.812108	0.631696	1344	8.03571	Per2	"NM_011066"	exon	0.0051417	0.00650283	0.00918564	0.00658054	0.00365549	0.0018018	f	0.950776	m	0.920466	m	0.489004
chr1	93390678	93392076	CGI579	90	0.891716	0.613523	1198	7.51252	Traf3ip1	"NM_028718"	exon	0.00438963	0.00629583	0.00415616	0.0123605	0.00679012	0	f	0.712322	f	0.882723	m	0.220504
chr1	93436242	93438091	CGI580	103	0.668766	0.612492	1649	6.24621	Asb1	"NM_001039126,NM_023046"	exon	0.00673833	0.00835648	0.0102729	0.00838017	0.00760948	0.00334891	f	0.950367	m	0.886427	m	0.443241
chr1	93696980	93699442	CGI581	161	0.718796	0.629531	2262	7.1176	Twist2	"NM_007855"	exon	0.013215	0.0125427	0.00513791	0.00595758	0.00462053	0.00396847	m	0.51663	f	0.925566	m	0.814841
chr1	94075805	94077929	CGI582	190	0.933388	0.651247	1924	9.87526			intergenic	0.00534003	0.0119106	0.00379251	0.00313968	0.00653936	0.00547264	f	0.658785	m	0.902395	m	0.642306
chr1	94369556	94370897	CGI583	76	0.800879	0.57844	1141	6.66082	Ndufa10	"NM_024197"	exon	0.0109811	0.0109708	0.00795455	0.00549934	0.00517677	0.00466569	m	0.920738	m	0.938321	m	0.885203
chr1	94537744	94539037	CGI584	63	0.690588	0.5828	1093	5.76395	Myeov2	"NR_028108,NM_001163425"	exon	0.0169674	0.00857176	0.00719316	0.00819736	0.00962266	0.00325521	m	0.920543	f	1	m	0.480598
chr1	94727238	94729600	CGI585	173	0.721839	0.666975	2162	8.00185	Gpc1	"NM_016696"	exon	0.00934239	0.00995933	0.00452744	0.00687319	0.00910467	0.00685301	f	0.810271	f	0.999292	m	0.606267
chr1	94744942	94745528	CGI586	25	0.619244	0.676166	386	6.47668	Gpc1	"NM_016696"	intron	0.0354751	0.0256854	0.00162338	0.00992063	0.018254	0	m	0.858837	f	0.891423	m	0.172105
chr1	94775739	94776096	CGI587	9	0.594009	0.630573	157	5.73248	Ankmy1	"NM_172850"	exon	0.190167	0.0868572	0.00568182	0.0431138	0.415476	0	m	0.29352	f	0.438221	m	0.000938833
chr1	94799380	94799991	CGI588	14	0.428468	0.56691	411	3.40633	Ankmy1	"NM_172850"	exon	0.0485819	0.0126202	0.00534091	0.003125	0.00271739	0.00568182	m	0.906488	m	0.908008	f	1
chr1	94803237	94804423	CGI589	87	0.830777	0.653144	986	8.82353	Dusp28	"NM_175118"	exon	0.0143721	0.0100746	0.00976177	0.00538052	0.00502245	0.00298273	m	0.532773	m	0.6724	m	0.852535
chr1	94806885	94808637	CGI590	151	0.835464	0.684923	1552	9.72938	Rnpepl1	"NM_181405"	exon	0.0113744	0.00944183	0.00969034	0.0103136	0.00672027	0.00471088	m	1	f	1	m	0.775474
chr1	94830508	94831812	CGI591	80	0.826292	0.593297	1104	7.24638	9430060I03Rik,Capn10	"NR_015525","NM_011796"	exon	0.00857389	0.00767591	0.00874749	0.00505491	0.00994365	0.00801757	m	1	m	1	m	0.826463
chr1	94968114	94968540	CGI592	10	0.881228	0.530973	226	4.42478	Kif1a	"NM_008440,NM_001110315"	intron	0.149482	0.119037	0.00452489	0.00367647	0.238888	0	m	0.962962	m	1	m	1.43954e-05
chr1	94996646	94998910	CGI593	117	0.56206	0.637112	2064	5.6686	Kif1a	"NM_008440,NM_001110315"	exon	0.00654433	0.00959156	0.00626917	0.00560915	0.0141884	0.00759412	f	0.794615	m	1	m	0.5405
chr1	95072887	95073741	CGI594	41	0.583831	0.655963	654	6.26911			intergenic	0.0118386	0.00936508	0.00854194	0.0132546	0.00381944	0.0147222	m	0.887785	f	0.930248	f	0.642306
chr1	95120411	95121000	CGI595	18	0.529415	0.596401	389	4.62725			intergenic	0.0134921	0.00252525	0.00308642	0	0.00326797	0.012016	m	0.888775	m	0.78159	f	0.480598
chr1	95131893	95133472	CGI596	103	0.711141	0.649021	1379	7.46918	Sned1	"NM_172463"	exon	0.0100718	0.0105109	0.00147392	0.00858091	0.00817271	0.00311991	f	0.919537	f	0.461971	m	0.343212
chr1	95202018	95202810	CGI597	33	0.643719	0.594595	592	5.57432	Mterfd2	"NM_178051"	exon	0.014702	0.0148122	0.0162801	0.00441788	0.0112916	0.00225225	f	1	m	0.804878	m	0.299183
chr1	95238966	95240877	CGI598	121	0.78578	0.600234	1711	7.07189	Pask,Ppp1r7	"NM_080850","NM_023200"	exon	0.00505017	0.00447317	0.0105325	0.00613032	0.0036817	0.00166825	m	0.913862	m	0.789699	m	0.642306
chr1	95290826	95291352	CGI599	18	0.639789	0.588957	326	5.52147	Ano7	"NM_207031"	exon	0.130549	0.146499	0.0173581	0.0178571	0.0337296	0	f	0.975337	f	0.78159	m	0.0356675
chr1	95297721	95298651	CGI600	37	0.557809	0.60411	730	5.06849	Ano7	"NM_207031"	exon	0.0166966	0.0398894	0.0124269	0.00135135	0.00335298	0.00185185	f	0.545199	m	0.78159	m	0.811745
chr1	95341323	95342697	CGI601	100	0.780462	0.66184	1174	8.51789	Hdlbp	"NM_133808"	intron	0.00866835	0.00762302	0.00737774	0.00151265	0.00819813	0.00878349	m	0.998077	m	0.604475	f	0.88571
chr1	95374575	95376372	CGI602	115	0.742193	0.623669	1597	7.201	Hdlbp,Sept2	"NM_133808","NM_010891,NM_001159718,NM_001159717,NM_001159719"	exon	0.0140036	0.00610806	0.00868082	0.00776581	0.00376724	0.0028183	m	0.380716	m	0.904065	m	0.724831
chr1	95408003	95409372	CGI603	87	0.694604	0.658683	1169	7.44226	Farp2	"NM_145519"	exon	0.0142366	0.00619563	0.00709385	0.00332375	0.00459381	0.00561009	m	0.545199	m	0.935474	f	0.76749
chr1	95531382	95532881	CGI604	111	0.810502	0.65358	1299	8.54503	Stk25	"NM_021537"	exon	0.0084027	0.00919897	0.00457613	0.00631351	0.00904063	0.00381042	f	0.977131	f	0.818166	m	0.383901
chr1	95565360	95565789	CGI605	12	0.657155	0.567686	229	5.24017			intergenic	0.0184524	0.0183983	0	0	0	0	m	0.96363	-	NA	-	NA
chr1	95581886	95583611	CGI606	129	0.802913	0.650492	1525	8.45902	Bok	"NM_016778"	exon	0.0109977	0.00693268	0.00842093	0.00870843	0.00460527	0.00644285	m	0.667636	f	0.928377	f	0.969314
chr1	95650270	95652170	CGI607	199	0.942254	0.705294	1700	11.7059	Atg4b,Thap4	"NM_174874","NM_025920"	exon	0.00741177	0.00665729	0.00727295	0.00308127	0.00526694	0.00739189	m	0.841909	m	0.409238	f	0.931617
chr1	95698082	95698969	CGI608	52	0.988836	0.554585	687	7.56914	Dtymk	"NM_001105667,NM_023136"	exon	0.000925926	0.00469978	0.0142559	0.00911229	0.00923922	0.00827604	f	0.794615	m	0.929639	m	1
chr1	95699912	95701395	CGI609	109	0.821469	0.643804	1283	8.49571	Ing5	"NM_025454"	exon	0.00989965	0.00486844	0.00681722	0.00291005	0.00927238	0.00574838	m	0.817566	m	0.368024	m	0.682554
chr1	95721353	95722360	CGI610	39	0.60752	0.578686	807	4.83271	D2hgdh	"NM_178882"	exon	0.00206612	0.00531287	0.00995343	0.00728804	0.00807154	0.00710594	f	0.895535	m	1	m	0.874203
chr1	95722847	95723336	CGI611	15	0.588481	0.598616	289	5.19031	D2hgdh	"NM_178882"	exon	0.118936	0.135937	0.0258577	0.00591348	0.0162176	0.00308642	f	0.927041	m	0.48155	m	0.480598
chr1	95918913	95919637	CGI612	19	0.407277	0.597328	524	3.62595	Neu4	"NM_173772"	exon	0.1436	0.23279	0.015438	0.0250957	0.0233278	0.0134097	f	0.662255	f	0.6724	m	0.613223
chr1	95931752	95932165	CGI613	9	0.528407	0.591549	213	4.22535			intergenic	0.0202609	0	0.00729766	0	0	0.0167484	m	0.429481	m	0.6724	f	0.480598
chr1	97209905	97211053	CGI614	85	0.785444	0.67616	948	8.96624	Fam174a	"NM_026321"	exon	0.0110724	0.00403141	0.00870139	0.00379172	0.00184045	0.0113135	m	0.715645	m	0.78159	f	0.38757
chr1	97563793	97564917	CGI615	59	0.830645	0.555195	924	6.38528	St8sia4	"NM_009183,NM_001159745"	exon	0.00231799	0.00373303	0.00497558	0.00267094	0.0060515	0.00503053	f	1	m	0.914903	m	0.746467
chr1	98160734	98161213	CGI616	15	0.954558	0.494624	279	5.37634			intergenic	0.0458333	0.528889	0.0876263	0	0.0972983	0.019943	f	0.0270261	m	0.0896662	m	0.0923312
chr1	98768341	98769182	CGI617	37	0.624959	0.608424	641	5.77223	Slco4c1	"NM_172658"	exon	0.00807494	0.00581395	0	0.00530107	0.00445736	0	m	0.794615	f	0.58402	m	0.354356
chr1	99556970	99559217	CGI618	207	0.903813	0.671226	2047	10.1124	D1Ertd622e	"NM_133825"	exon	0.00665702	0.00886859	0.0123708	0.00548852	0.00644705	0.00518603	f	0.946104	m	0.6724	m	0.971429
chr1	99665706	99667379	CGI619	106	0.881535	0.571623	1473	7.1962	Gin1,Ppip5k2	"NM_026250","NM_173760"	exon	0.00459596	0.00800204	0.00350108	0.00616176	0.00516831	0.00542328	f	0.881615	f	0.881669	f	0.909039
chr1	99873245	99874112	CGI620	49	0.757687	0.623688	667	7.34633	Pam	"NM_013626"	exon	0.011397	0.00461538	0	0.00197628	0.00629049	0.00773405	m	0.744803	f	0.78159	f	0.790378
chr1	99991290	99992996	CGI621	109	0.70442	0.641434	1506	7.23772	Pam	"NM_013626"	exon	0.00998113	0.00674565	0.00328136	0.0120561	0.00326545	0	m	0.919537	f	0.78159	m	0.21984
chr1	106664907	106666129	CGI622	52	0.56688	0.60274	1022	5.08806	Cdh20	"NM_011800"	exon	0.00775862	0.00552608	0.00245098	0.00896026	0.0150393	0.0086335	m	0.841909	f	0.6724	m	0.758324
chr1	106881160	106881523	CGI623	11	0.728034	0.619632	163	6.74847	Cdh20	"NM_011800"	exon	0.203287	0.157983	0.00883191	0.0122549	0	0	m	0.809227	f	1	-	NA
chr1	106890310	106891154	CGI625	53	0.853688	0.622671	644	8.22981	Cdh20	"NM_011800"	exon	0.0161389	0.00926689	0.0152441	0	0.0115451	0.00515152	m	0.810271	m	0.220219	m	0.234886
chr1	107252263	107253698	CGI626	86	0.647724	0.65749	1235	6.96356	Rnf152	"NM_178779,NM_001160368"	exon	0.0137741	0.0106986	0.00836797	0.0145529	0.00577922	0.00910017	m	0.875264	f	0.758517	f	0.693698
chr1	107559733	107561507	CGI627	108	0.710633	0.625794	1574	6.8615	2310035C23Rik,Pign	"NM_029349,NM_173187","NM_013784"	exon	0.00516946	0.00499964	0.00647701	0.00372063	0.00266338	0.00731088	m	1	m	0.805607	f	0.642306
chr1	107660671	107661127	CGI628	18	0.679905	0.644531	256	7.03125			intergenic	0.578843	0.544175	0.0684584	0.0319717	0.00638371	0.0247685	m	0.901461	m	0.793391	f	0.526219
chr1	107676622	107677965	CGI629	85	0.740369	0.63692	1143	7.43657	Tnfrsf11a	"NM_009399"	exon	0.0169303	0.0214091	0.00767894	0.00789223	0.00577176	0.00324266	f	0.809227	f	0.764018	m	0.538906
chr1	107710067	107710557	CGI630	15	0.597134	0.589655	290	5.17241	Tnfrsf11a	"NM_009399"	exon	0.271563	0.233191	0.00416667	0.011859	0.035956	0.005	m	0.850735	f	0.78159	m	0.078206
chr1	107740982	107741663	CGI631	27	0.549325	0.640333	481	5.61331	Tnfrsf11a	"NM_009399"	exon	0.0287603	0.0128873	0.0157402	0.00452899	0.0292062	0.00803571	m	0.794615	m	0.799993	m	0.214456
chr1	107777546	107777957	CGI632	12	0.532341	0.663507	211	5.6872			intergenic	0.0412815	0.00347222	0.00416667	0.0078125	0.00729167	0	m	0.517415	f	0.908008	m	0.480598
chr1	107886193	107888728	CGI633	241	0.897974	0.678373	2335	10.3212	Zcchc2	"NM_001122676,NM_001122675"	exon	0.00885941	0.00556212	0.00556817	0.0065712	0.0071917	0.0025641	m	0.72869	f	0.78527	m	0.0932264
chr1	107889967	107890797	CGI634	42	0.733418	0.609524	630	6.66667	Zcchc2	"NM_001122676,NM_001122675"	intron	0.00807823	0.00776499	0.00748815	0.00901463	0.00639296	0.00529101	m	0.94633	f	0.927131	m	0.720285
chr1	108067834	108070207	CGI635	253	0.950123	0.700414	2173	11.6429	LOC626049,Phlpp1	"NR_040630","NM_133821"	exon	0.010698	0.00704335	0.0054245	0.00930635	0.00437363	0.00357464	m	0.966036	f	0.895631	m	0.438776
chr1	108608819	108609617	CGI636	33	0.588305	0.615385	598	5.51839	Bcl2	"NM_009741,NM_177410"	exon	0.0516213	0.0605438	0.00599401	0.0124269	0.0097488	0.00586735	f	0.892063	f	1	m	0.881962
chr1	108610074	108611591	CGI637	118	0.849914	0.649962	1317	8.95976	Bcl2	"NM_009741,NM_177410"	exon	0.00998608	0.00540477	0.0135037	0.00836962	0.00698453	0.00551378	m	0.88644	m	1	m	0.633284
chr1	108655684	108656801	CGI638	65	0.768499	0.608506	917	7.08833	Kdsr	"NM_027534"	exon	0.00252747	0.00899335	0.00438312	0.0093541	0.00545788	0.00134409	f	0.925524	f	0.922966	m	0.439914
chr1	108692607	108693571	CGI639	59	0.783595	0.629581	764	7.72251	Vps4b	"NM_009190"	exon	0.00182149	0.00812808	0.00787484	0.00621469	0.0104281	0.00630426	f	0.891011	m	0.932554	m	0.769858
chr1	111878758	111880118	CGI640	70	0.678313	0.600862	1160	6.03448			intergenic	0.0111777	0.00484547	0.00957391	0.00270062	0.00520833	0.00651042	m	0.552532	m	0.766062	f	0.860717
chr1	113651053	113651423	CGI641	8	0.498378	0.623529	170	4.70588			intergenic	0.120598	0.0295345	0.0245421	0.0121528	0.00879839	0	m	0.262793	m	0.823875	m	0.495887
chr1	113760789	113761816	CGI642	66	0.707052	0.673519	827	7.98065	Dsel	"NM_001081316"	exon	0.0113681	0.0036807	0.00393375	0.0059745	0.00843884	0.00431067	m	0.620563	f	0.867204	m	0.764544
chr1	114312900	114313782	CGI643	36	0.612741	0.587977	682	5.27859			intergenic	0.00518018	0.003861	0.00546001	0.00350148	0.00366366	0.00564626	m	0.794615	m	1	f	0.822672
chr1	117581179	117581545	CGI644	10	0.826354	0.542169	166	6.0241			intergenic	0.0260721	0.00308642	0	0.00694444	0.0131364	0	m	0.898476	f	0.78159	m	0.25649
chr1	120207248	120208253	CGI645	67	0.855248	0.624845	805	8.32298	Tsn	"NM_011650"	exon	0.00742934	0.0102936	0.00426242	0.00303189	0.00922594	0.00415584	f	0.705635	m	0.914713	m	0.518689
chr1	120218163	120218983	CGI646	44	0.867927	0.575806	620	7.09677	Mki67ip	"NM_026472"	exon	0.00342167	0.0159911	0.017061	0.00995691	0.00251182	0	f	0.670859	m	0.888224	m	0.480598
chr1	120285144	120286456	CGI647	67	0.809438	0.546763	1112	6.02518	Clasp1	"NM_001081276,NM_029709,NM_177548"	exon	0.00328613	0.00604849	0.00678904	0.00521362	0.00481494	0.00358567	f	0.871434	m	0.78159	m	0.915554
chr1	120286435	120286932	CGI648	16	0.613649	0.609428	297	5.38721	Clasp1	"NM_001081276,NM_029709,NM_177548"	intron	0.00511364	0.00616162	0.00454545	0	0.00407585	0.00324675	f	1	m	0.78159	m	0.822841
chr1	120355654	120356675	CGI649	50	0.745863	0.572473	821	6.09013	2900060B14Rik,Clasp1	"NR_027901","NM_001081276,NM_029709,NM_177548"	exon	0.00565302	0.00720165	0.0118406	0.00984908	0.00539367	0.00456383	f	1	m	0.892353	m	0.886898
chr1	120524195	120525131	CGI650	50	0.64934	0.648098	736	6.79348	Tfcp2l1	"NM_023755"	exon	0.00613371	0.000974659	0.00620312	0	0.0141458	0.00328256	m	0.666686	m	0.421505	m	0.361787
chr1	120733759	120734749	CGI651	51	0.633815	0.644304	790	6.4557	Gli2	"NM_001081125"	exon	0.359096	0.3495	0.0228074	0.0410081	0.00608078	0.00891848	m	0.9562	f	0.581911	f	1
chr1	120944081	120944955	CGI652	55	0.800696	0.642433	674	8.16024	Gli2	"NM_001081125"	intron	0.00874443	0.00895594	0.00479185	0.00978862	0.00580347	0.00584795	f	0.944793	f	0.6724	f	0.858927
chr1	120948442	120951119	CGI653	140	0.634434	0.597093	2477	5.652	Gli2	"NM_001081125"	exon	0.0115292	0.00969388	0.00465067	0.00800083	0.00590561	0.00335345	m	0.873389	f	0.895849	m	0.16611
chr1	121085896	121086583	CGI654	25	0.582036	0.595483	487	5.13347			intergenic	0.0150779	0.00549451	0.0123759	0.0109404	0.0190414	0.00226244	m	0.585152	m	0.936953	m	0.354356
chr1	121316324	121319788	CGI655	294	0.777053	0.681066	3264	9.00735	Inhbb	"NM_008381"	exon	0.00763867	0.00632273	0.00612907	0.00700206	0.00453599	0.00471295	m	0.935347	f	0.977439	f	1
chr1	121400796	121401800	CGI656	57	0.691457	0.643035	804	7.08955	Ralb	"NM_022327"	exon	0.00594616	0.00463548	0.0060677	0.00354753	0.00531545	0.00515152	m	0.899035	m	1	m	0.936672
chr1	121422093	121423695	CGI657	104	0.706545	0.653352	1402	7.41797	Tmem185b	"NM_146103"	exon	0.0611278	0.0813664	0.0117453	0.0098725	0.0146325	0.00889232	f	0.906549	m	0.849941	m	0.179077
chr1	121538973	121539359	CGI658	10	0.641528	0.580645	186	5.37634	Epb4.1l5	"NM_001113416,NM_145506"	exon	0.159349	0.0989706	0.00757576	0	0.316501	0.00534759	m	0.794615	m	0.78527	m	0.0012186
chr1	121544715	121545906	CGI659	87	0.852934	0.643794	991	8.77901	Epb4.1l5	"NM_001113416,NM_145506"	exon	0.0110562	0.00733352	0.00797538	0.00874799	0.00638493	0.00726365	m	0.895042	f	0.851233	f	0.939161
chr1	121733246	121734574	CGI660	109	0.884314	0.662234	1128	9.66312	Ptpn4	"NM_019933"	exon	0.00768989	0.00880757	0.00748563	0.00447278	0.00585849	0.00366004	f	1	m	1	m	0.657617
chr1	121809547	121810113	CGI661	27	0.843325	0.598361	366	7.37705	Tmem177	"NM_175106"	exon	0.0252998	0.00922231	0.00855996	0.00178253	0.0011655	0	m	0.758489	m	0.6724	m	0.642306
chr1	121893553	121894003	CGI662	18	0.825671	0.592	250	7.2			intergenic	0.00543478	0.00992063	0.00501672	0.0103941	0.00166667	0.00277778	f	0.912265	f	0.809146	f	1
chr1	121903633	121904344	CGI663	27	0.626316	0.590998	511	5.28376	Sctr	"NM_001012322"	exon	0.00775961	0.00183824	0.00531046	0.00347222	0.0150947	0	m	0.659031	m	0.78159	m	0.118075
chr1	121918596	121918951	CGI664	10	0.752927	0.6	155	6.45161	Sctr	"NM_001012322"	exon	0.152315	0.205188	0.00201613	0.0226852	0.185282	0.00520833	f	0.898371	f	0.409055	m	0.000178931
chr1	121969556	121970932	CGI665	63	0.647381	0.57568	1176	5.35714	Tmem37	"NM_019432"	exon	0.0131712	0.00779272	0.00867194	0.00353347	0.0066771	0.00297619	m	0.937239	m	0.78159	m	0.480598
chr1	122017214	122018286	CGI666	56	0.791005	0.571101	872	6.42202	3110009E18Rik,Dbi	"NM_028439,NM_001172074","NM_007830,NM_001037999"	exon	0.00306513	0.00960119	0.0057906	0.00891813	0.00518932	0.0161922	f	0.835356	f	0.888224	f	0.680899
chr1	122161405	122162255	CGI667	36	0.551618	0.635385	650	5.53846	Steap3	"NM_001085409,NM_133186"	exon	0.0190744	0.00326655	0.0119935	0.00515516	0.00338333	0	m	0.796643	m	0.78159	m	0.480598
chr1	122236636	122239467	CGI668	183	0.697486	0.631699	2631	6.95553	C1ql2	"NM_207233"	exon	0.00813391	0.00903104	0.00608508	0.00578894	0.00633336	0.00550333	f	0.839161	m	0.993718	m	0.632993
chr1	122365573	122365934	CGI669	8	0.65656	0.552795	161	4.96894			intergenic	0.0208333	0.0231481	0.0175926	0.0260943	0.0194805	0	f	0.919537	f	1	m	0.644608
chr1	122492410	122493678	CGI670	51	0.65884	0.544007	1068	4.77528			intergenic	0.00174825	0.00559517	0.00506536	0.0126823	0.00798509	0.00353435	f	0.794615	f	0.860138	m	0.691114
chr1	122496279	122496902	CGI671	27	0.835625	0.560284	423	6.38298			intergenic	0.00404858	0	0.00706845	0.00716146	0.0134371	0.00347222	m	0.658785	f	1	m	0.383901
chr1	122498584	122500767	CGI672	159	0.833803	0.620777	1983	8.01815	En1	"NM_010133"	exon	0.012056	0.00704275	0.0102464	0.0098429	0.0095271	0.00670216	m	1	m	0.690114	m	0.505104
chr1	122501217	122501929	CGI673	26	0.562621	0.601562	512	5.07812	En1	"NM_010133"	intron	0	0.0169131	0.0112193	0.00277778	0.00222222	0.00277778	f	0.484104	m	0.78159	f	1
chr1	122503126	122504096	CGI674	47	0.687937	0.597403	770	6.1039	En1	"NM_010133"	exon	0.00429354	0.0120334	0.00083612	0.00187962	0.00787754	0.00431235	f	0.719645	f	0.895631	m	0.818343
chr1	122510083	122510525	CGI675	12	0.552282	0.603306	242	4.95868			intergenic	0.0121212	0.00835561	0	0.00816435	0.0021645	0.00680272	m	1	f	0.58402	f	1
chr1	122510781	122511306	CGI676	16	0.569935	0.590769	325	4.92308			intergenic	0	0.0147727	0.010101	0.0114538	0.0123648	0	f	0.658785	f	0.78159	m	0.29258
chr1	123074357	123074965	CGI677	31	0.770483	0.629902	408	7.59804			intergenic	0.00185185	0.00489796	0.00347222	0.00357143	0.00275094	0.00505051	f	0.888775	f	1	f	0.814202
chr1	123223860	123224920	CGI678	56	0.652883	0.637209	860	6.51163	Insig2	"NM_133748,NM_178082,NM_001271532,NM_001271531"	exon	0.0133145	0.00724206	0.00511364	0.00679293	0.0121648	0.00277778	m	0.919537	f	1	m	0.0725363
chr1	123327406	123328513	CGI679	44	0.487517	0.631753	907	4.85116	Ccdc93	"NM_029955,NM_001025156"	exon	0.0120483	0.020788	0.00521739	0.00284954	0.00197628	0.00893378	f	0.795257	m	1	f	0.480598
chr1	123423727	123425333	CGI680	85	0.709805	0.583926	1406	6.04552	Htr5b	"NM_010483"	exon	0.0475373	0.0427958	0.0171956	0.00744763	0.0110367	0.00382653	m	0.806666	m	0.58402	m	0.354356
chr1	123464019	123464957	CGI681	50	0.799422	0.582656	738	6.77507	Ddx18	"NM_025860"	exon	0.0135396	0.00390947	0.00377358	0.0129489	0.00434051	0.00115741	m	0.461663	f	0.822883	m	0.642306
chr1	124253604	124254012	CGI682	14	0.777796	0.591346	208	6.73077			intergenic	0.275254	0.327592	0.0221068	0.0104167	0.0164169	0.00240385	f	0.841365	m	0.865755	m	0.446051
chr1	125941477	125942995	CGI683	83	0.602085	0.647193	1318	6.29742	Dpp10	"NM_199021"	exon	0.00667583	0.00125	0.00195178	0.00277459	0.0102541	0.00434219	m	0.552448	f	1	m	0.529765
chr1	127331133	127332829	CGI684	102	0.68544	0.632353	1496	6.81818	Actr3	"NM_023735,NM_001205386,NM_001205385"	exon	0.0121795	0.00861223	0.00558638	0.0130826	0.00549698	0.00529324	m	0.939529	f	0.72988	m	1
chr1	127456646	127458244	CGI685	95	0.654934	0.65093	1398	6.79542	Slc35f5	"NM_028787"	exon	0.00642876	0.00799988	0.0115079	0.00914994	0.00551673	0.0106336	f	0.862349	m	1	f	0.802622
chr1	127807646	127809523	CGI686	103	0.648251	0.617174	1677	6.14192	Lypd1	"NM_145100"	exon	0.0111611	0.0074858	0.0069637	0.00723857	0.00815514	0.00817306	m	0.719519	f	0.933911	f	0.84675
chr1	128389005	128389508	CGI687	21	0.615095	0.673267	303	6.93069	Nckap5	"NM_001081756,NM_172484,NM_176957"	exon	0.0218254	0.0266865	0.00721501	0.00612245	0.00443072	0	f	0.758293	m	1	m	0.480598
chr1	129101304	129103326	CGI688	115	0.65895	0.622942	1822	6.31175	Mgat5	"NM_145128"	exon	0.00860611	0.00844437	0.00718853	0.00494483	0.00452117	0.00884039	m	0.700027	m	0.78159	f	1
chr1	129573147	129575098	CGI689	124	0.704052	0.634495	1751	7.08167	Tmem163	"NM_028135"	exon	0.00813493	0.00663212	0.00298535	0.00848411	0.00466573	0.00404582	m	0.68997	f	0.869065	m	0.79812
chr1	129670306	129671614	CGI690	96	0.910447	0.620036	1108	8.66426	2900009J06Rik,Ccnt2	"NR_045298","NM_028399"	exon	0.00360597	0.0121032	0.00766453	0.00288035	0.00789648	0.00181818	f	0.703691	m	0.78159	m	0.236189
chr1	129765096	129765928	CGI691	39	0.715443	0.593354	632	6.17089	Rab3gap1	"NM_178690"	exon	0.00559076	0.0268013	0.00695174	0.00167224	0.00332059	0.00812499	f	0.576305	m	0.78159	f	0.688538
chr1	129999349	130000741	CGI692	89	0.830768	0.599832	1192	7.46644	R3hdm1	"NM_181750"	exon	0.0103261	0.00809066	0.00620689	0.00609756	0.00608168	0.00781102	m	0.806185	m	0.895631	f	0.772345
chr1	130140414	130141626	CGI693	87	0.88117	0.625494	1012	8.59684	Ubxn4	"NM_026390"	exon	0.00387921	0.00348999	0.00613989	0.00530303	0.0103323	0.00811114	m	1	m	0.78159	m	0.546694
chr1	130255702	130256607	CGI694	63	0.942532	0.619858	705	8.93617	Mcm6	"NM_008567"	exon	0.0100937	0.0124192	0.00904787	0.00614487	0.00676488	0.00586354	f	0.978234	m	0.78527	m	1
chr1	130313167	130314235	CGI695	67	0.792151	0.626728	868	7.71889	Dars	"NM_145507,NM_177445"	exon	0.0113882	0.00477464	0.00421607	0.00864353	0.00708535	0.00410354	m	0.685013	f	0.849941	m	0.63086
chr1	130368969	130369345	CGI696	9	0.648373	0.579545	176	5.11364			intergenic	0.0208333	0.0102041	0	0	0.00494965	0.00795918	m	1	-	NA	f	1
chr1	130487261	130489197	CGI697	106	0.772486	0.56394	1736	6.10599	Cxcr4	"NM_009911"	exon	0.00933537	0.0100769	0.00863075	0.00652457	0.00742308	0.001001	f	0.986626	m	0.78159	m	0.233465
chr1	130489601	130490015	CGI698	14	0.73758	0.607477	214	6.54206			intergenic	0.00310559	0.00561594	0.0184842	0.00891862	0.0163592	0	f	0.905517	m	0.908008	m	0.25758
chr1	131169594	131170497	CGI699	41	0.548986	0.657183	703	5.83215	Thsd7b	"NM_172485"	exon	0.0174242	0.00462963	0.00247678	0.00252525	0.00892249	0.00564374	m	0.802521	f	0.901792	m	0.690908
chr1	131491956	131492340	CGI700	8	0.474373	0.608696	184	4.34783	Thsd7b	"NM_172485"	exon	0.239794	0.177356	0.031004	0.01925	0.0153846	0.0195924	m	0.758293	m	0.85747	f	0.648162
chr1	132358692	132359487	CGI701	41	0.6772	0.638655	595	6.89076	Cd55	"NM_010016"	exon	0.0082026	0.0124537	0	0.0022597	0.00403439	0.00338542	f	0.930216	f	0.6724	m	0.852535
chr1	132611990	132612686	CGI702	33	0.617743	0.659274	496	6.65323	Pfkfb2	"NR_027859,NM_008825,NM_001162415"	exon	0.0111561	0.00966421	0.0036855	0.004158	0.004158	0.00168067	m	0.889699	f	0.899834	m	0.809489
chr1	132613049	132614657	CGI703	100	0.754485	0.614347	1408	7.10227	Pfkfb2,Yod1	"NM_001162415","NM_178691"	exon	0.00952024	0.00515194	0.00374667	0.00129784	0.0106922	0.0069401	m	0.898371	m	0.843518	m	0.861963
chr1	132774467	132775242	CGI704	40	0.683438	0.64	575	6.95652	Faim3	"NM_026976"	exon	0.00715839	0.00712876	0.00994239	0.00882035	0.00189394	0.00793651	m	1	m	0.83379	f	1
chr1	132993175	132994748	CGI705	132	0.832529	0.682447	1373	9.61398	Mapkapk2	"NM_008551"	exon	0.00723434	0.00951891	0.00874877	0.00642298	0.00596535	0.00741031	f	0.898371	m	0.902922	f	0.85723
chr1	133034173	133035367	CGI706	88	0.855915	0.643863	994	8.85312	Dyrk3	"NM_145508"	exon	0.00455775	0.0104793	0.0136257	0.00602936	0.00594765	0.001443	f	0.818282	m	0.889246	m	0.58632
chr1	133049451	133050016	CGI707	24	0.76013	0.589041	365	6.57534	Eif2d	"NM_001136070,NM_010709"	exon	0.00965309	0	0.00297619	0.00185185	0	0	m	0.658785	m	1	-	NA
chr1	133096280	133096691	CGI708	10	0.609735	0.559242	211	4.73934	Rassf5	"NM_018750"	intron	0.155418	0.128844	0.00799794	0.0104072	0.017507	0.00694444	m	0.892063	f	0.936657	m	0.642954
chr1	133140574	133142520	CGI709	127	0.725518	0.633448	1746	7.27377	Rassf5	"NM_018750"	exon	0.00897159	0.0110949	0.0066589	0.00613293	0.00589782	0.00684503	f	0.888775	m	0.821276	f	0.74235
chr1	133172199	133172553	CGI710	7	0.604819	0.551948	154	4.54545	Ikbke	"NM_019777"	exon	0.169563	0.0629794	0.00480769	0.00769231	0.0186064	0	m	0.189005	f	1	m	0.354356
chr1	133421658	133425318	CGI711	225	0.711579	0.60896	3460	6.50289	Fam72a,Srgap2	"NM_175382","NM_001081011"	exon	0.00553322	0.00943881	0.00798612	0.00508039	0.00548851	0.00631223	f	0.705014	m	0.895631	f	1
chr1	133451791	133452215	CGI712	11	0.818198	0.491071	224	4.91071			intergenic	0.0404762	0.098545	0	0.00714286	0	0	f	0.794615	f	0.804349	-	NA
chr1	133496403	133496814	CGI713	10	0.550662	0.592417	211	4.73934	Avpr1b	"NM_011924"	exon	0.136874	0.120395	0.0191683	0.0253522	0.0230769	0.00505051	m	0.980231	f	1	m	0.770585
chr1	133693916	133694436	CGI714	19	0.630589	0.615625	320	5.9375	Pm20d1	"NM_178079"	exon	0.0192744	0.00297619	0.0093254	0.003663	0.0220161	0.011867	m	0.890288	m	0.895631	m	0.710756
chr1	133723747	133725216	CGI715	76	0.636449	0.613869	1269	5.98897	Slc41a1	"NM_173865"	exon	0.010559	0.0141828	0.00634202	0.00779221	0.00526227	0.00389839	f	0.964664	f	0.927131	m	0.92029
chr1	133763611	133764619	CGI716	46	0.68686	0.579208	808	5.69307	Rab7l1	"NM_144875"	exon	0.00474166	0.00334169	0.00507112	0.00684917	0.00170068	0.0082856	m	0.829137	f	0.827074	f	0.642306
chr1	133806705	133808324	CGI717	125	0.859923	0.640592	1419	8.80902	Nucks1	"NM_175294,NM_001145804"	exon	0.00689434	0.00439829	0.0084218	0.00497406	0.00828019	0.00474594	m	0.91555	m	0.821688	m	0.974003
chr1	133858974	133860724	CGI718	116	0.724519	0.643871	1550	7.48387	Slc45a3	"NM_001177628"	exon	0.00535591	0.00355859	0.00759015	0.00707647	0.00536352	0.0112221	m	0.76428	m	0.972512	f	0.642306
chr1	133903707	133905251	CGI719	129	0.903898	0.656994	1344	9.59821	Elk4	"NM_007923"	exon	0.00269351	0.011486	0.0105455	0.00747197	0.00689976	0.00546659	f	0.669449	m	0.744844	m	0.730959
chr1	133963803	133965019	CGI720	81	0.760427	0.648622	1016	7.97244	Mfsd4	"NM_172510,NM_001114662"	exon	0.0184278	0.00385033	0.0068793	0.00821995	0.0039503	0.00239294	m	0.188203	f	0.807305	m	1
chr1	134013130	134013548	CGI721	11	0.643443	0.568807	218	5.04587	Cdk18	"NM_008795"	exon	0.0411106	0.125101	0.00392157	0.00653595	0.0200535	0	f	0.491122	f	1	m	0.490223
chr1	134035228	134036507	CGI722	62	0.624528	0.609824	1079	5.74606	Cdk18	"NM_008795"	exon	0.00582634	0.00366966	0.00926339	0.004995	0.00262308	0.0031746	m	0.860179	m	0.811653	f	0.791325
chr1	134086387	134088480	CGI723	164	0.82409	0.653988	1893	8.6635	Lemd1	"NM_001033250"	exon	0.00735979	0.00532638	0.00896997	0.00608983	0.00543043	0.00517504	m	0.670859	m	0.776718	m	0.826923
chr1	134108887	134109259	CGI724	12	1.05064	0.523256	172	6.97674	Lemd1	"NM_001033250"	intron	0.01	0.0336378	0.00357143	0	0.0128788	0.00350877	f	0.670859	m	0.78159	m	0.804643
chr1	134194819	134196376	CGI725	111	0.748451	0.662491	1357	8.17981	Klhdc8a	"NM_144810"	exon	0.0130329	0.0218878	0.0135893	0.00652114	0.00532407	0.00795855	f	1	m	0.6724	f	1
chr1	134212337	134213340	CGI726	68	0.881808	0.620174	803	8.46824	Nuak2	"NM_028778,NM_001195025"	exon	0.0180472	0.00944375	0.00766375	0.00545355	0.00666044	0.00513699	m	0.742762	m	0.892663	m	0.859299
chr1	134256973	134257722	CGI727	35	0.693821	0.608379	549	6.37523	Tmcc2	"NM_178874"	exon	0.282548	0.170326	0.019032	0.004884	0.0540076	0.0119763	m	0.0148995	m	0.290959	m	0.00048524
chr1	134277136	134277715	CGI728	24	0.590525	0.662269	379	6.33245	Tmcc2	"NM_178874"	exon	0.0702752	0.159162	0.0037037	0.00144928	0.0419198	0.0047619	f	0.0881544	m	1	m	0.0301179
chr1	134287279	134288781	CGI729	104	0.761154	0.648233	1302	7.98771	Tmcc2	"NM_178874"	exon	0.015754	0.00890225	0.00849587	0.00291058	0.0077533	0.00444814	m	0.372479	m	0.78159	m	0.642508
chr1	134313698	134314895	CGI730	88	0.834322	0.660983	997	8.82648	Dstyk	"NM_172516"	exon	0.00662996	0.000639386	0.00755421	0.00658617	0.00784128	0.0129658	m	0.461921	m	0.819883	f	0.990022
chr1	134373443	134374379	CGI731	44	0.825751	0.543478	736	5.97826	Rbbp5	"NM_172517"	exon	0.00904272	0.00909814	0.00702076	0.00766178	0.0131859	0.00491898	f	1	f	1	m	0.642306
chr1	134415196	134415579	CGI732	11	0.709699	0.590164	183	6.01093	Cntn2	"NM_177129"	exon	0.169782	0.24132	0.00740741	0.0042735	0.278478	0.00505051	f	0.728874	m	1	m	3.2458e-05
chr1	134439173	134439789	CGI733	26	0.577504	0.661058	416	6.25	Cntn2	"NM_177129"	exon	0.0016129	0.0114439	0.00258065	0.00266102	0.00875576	0.00478554	f	0.658785	f	0.90048	m	1
chr1	134637656	134638742	CGI734	54	0.645179	0.623025	886	6.09481	Nfasc	"NM_182716,NM_001160317"	exon	0.010068	0.0170615	0.0154868	0.00701531	0.000992063	0.0047619	f	0.974393	m	0.78159	f	0.798968
chr1	134655197	134655613	CGI735	12	0.606723	0.611111	216	5.55556			intergenic	0.00520833	0.00992647	0	0.0078125	0.00208333	0.010016	f	0.898485	f	0.78159	f	0.782526
chr1	134776356	134778378	CGI736	115	0.616279	0.64764	1822	6.31175	Lrrn2	"NM_010732"	exon	0.00481997	0.00580693	0.00856839	0.00480226	0.0118501	0.00614307	f	1	m	0.943325	m	0.361696
chr1	134834687	134835428	CGI737	23	0.466421	0.606285	541	4.25139	Lrrn2	"NM_010732"	exon	0.223779	0.191216	0.012851	0.0192429	0.0217723	0.00717507	m	0.795257	f	0.82732	m	0.443876
chr1	134921433	134922186	CGI738	36	0.697467	0.629295	553	6.50995	Mdm4	"NM_008575"	exon	0.00462963	0.00915008	0	0.00394033	0	0.00588235	f	0.843338	f	0.6724	f	0.642306
chr1	134942103	134943598	CGI739	120	0.838193	0.666409	1295	9.26641	Pik3c2b	"NM_001099276"	exon	0.0122019	0.00828255	0.00648336	0.0108747	0.00835399	0.00383844	m	0.290348	f	0.826463	m	0.642306
chr1	135027463	135028809	CGI740	104	0.868485	0.647469	1146	9.07504	Ppp1r15b	"NM_133819"	exon	0.00876198	0.00821335	0.00715872	0.00754359	0.00768196	0.00235293	m	0.893004	f	0.981178	m	0.193548
chr1	135028856	135029284	CGI741	9	0.488861	0.570175	228	3.94737	Ppp1r15b	"NM_133819"	exon	0.00591716	0	0.00699301	0.0161172	0.0042735	0.0128205	m	0.795257	f	0.895861	f	0.77753
chr1	135060131	135061502	CGI742	94	0.757419	0.65158	1171	8.02733			intergenic	0.00618732	0.00886628	0.00445073	0.00653217	0.00941516	0.00184332	f	0.79124	f	0.935519	m	0.480598
chr1	135077899	135078376	CGI743	15	0.551594	0.642599	277	5.41516			intergenic	0.00617284	0.00333333	0.0025	0.003125	0.0166667	0.00263158	m	1	f	1	m	1
chr1	135078810	135079576	CGI744	29	0.499804	0.64311	566	5.12367			intergenic	0.013168	0.00832098	0.00279018	0.00183824	0.0175477	0.0017301	m	0.913862	m	0.895631	m	0.262763
chr1	135225522	135226440	CGI745	36	0.582974	0.587744	718	5.01393	Kiss1	"NM_178260"	exon	0.0114834	0.0199023	0.0034188	0.00578823	0.0120665	0.00348068	f	0.89018	f	0.837511	m	0.46734
chr1	135259863	135261174	CGI746	76	0.641365	0.653465	1111	6.84068	Etnk2	"NM_175443"	exon	0.00181759	0.00692637	0.0114612	0.0108491	0.00871212	0	f	0.747532	m	0.973069	m	0.199381
chr1	135284536	135284979	CGI747	10	0.589097	0.604938	243	4.11523	Sox13	"NM_011439"	intron	0.0594596	0.0814368	0	0.0152116	0.375943	0.015873	f	0.877251	f	0.58402	m	0.000249066
chr1	135319209	135321382	CGI748	188	0.813468	0.684744	1973	9.52864	Sox13	"NM_011439"	exon	0.00747272	0.00428486	0.0052073	0.00604731	0.00964361	0.00550113	m	0.721907	f	0.969123	m	0.496891
chr1	135389491	135389915	CGI749	15	0.860987	0.5625	224	6.69643			intergenic	0.00560224	0.00464853	0	0.00763126	0.0121832	0.00340136	m	1	f	0.6724	m	0.74828
chr1	135506172	135507190	CGI750	77	0.942929	0.640587	818	9.4132	Snrpe	"NM_009227"	exon	0.00565629	0.00536098	0.0133872	0.00974744	0.012568	0.00760483	m	1	m	0.925984	m	0.641758
chr1	135556954	135557403	CGI751	11	0.653372	0.522088	249	4.41767	Zbed6,Zc3h11a	"NM_001166552","NM_144530"	exon	0.00481999	0.0208145	0.0180481	0.00857843	0.00183824	0	f	1	m	0.894742	m	0.642306
chr1	135557350	135558239	CGI752	49	0.734682	0.625544	689	7.11176	Zbed6,Zc3h11a	"NM_001166552","NM_144530"	exon	0.00854834	0.00183566	0.00732143	0.00536309	0.00656177	0	m	0.690364	m	0.925984	m	0.266772
chr1	135632708	135633082	CGI753	9	0.643404	0.568966	174	5.17241	Atp2b4	"NM_213616,NM_001167949"	intron	0.0182319	0.0123457	0.00617284	0	0.380442	0	m	0.928179	m	0.791816	m	0.00418414
chr1	135697151	135697574	CGI754	11	0.498795	0.632287	223	4.93274			intergenic	0.00392157	0	0.00767544	0	0.00444444	0	m	0.794615	m	0.6724	m	0.642306
chr1	135697527	135697905	CGI755	11	0.742482	0.601124	178	6.17978			intergenic	0.0127273	0	0.0251082	0.0260606	0	0.00392157	m	0.71466	f	1	f	0.642306
chr1	135804893	135805777	CGI756	39	0.606747	0.627193	684	5.70175			intergenic	0.0213224	0.00378788	0.00553502	0.00637066	0.00277778	0	m	0.241906	f	0.962903	m	0.642306
chr1	135942949	135943435	CGI757	20	0.709001	0.629371	286	6.99301	Fmod	"NM_021355"	exon	0.0322426	0.0449969	0.0338976	0.00793651	0.00994601	0.0030303	f	0.907337	m	0.401495	m	0.642306
chr1	135957395	135958116	CGI758	25	0.505757	0.621881	521	4.79846			intergenic	0.00448565	0.00260417	0.00183824	0.00367647	0.0172737	0.0046875	m	0.898371	f	1	m	0.459858
chr1	135959604	135960073	CGI759	15	0.613645	0.605948	269	5.57621			intergenic	0.0129831	0.0217391	0.00362319	0.00959596	0.00568182	0.0110421	f	0.944793	f	0.88657	f	0.81745
chr1	135975190	135976275	CGI760	70	0.782104	0.637288	885	7.9096	Btg2	"NM_007570"	exon	0.00717623	0.00718994	0.00929784	0.0114813	0.00771114	0.00372313	f	1	f	0.834251	m	0.561051
chr1	135989292	135990238	CGI761	42	0.598559	0.613941	746	5.63003			intergenic	0.00844156	0.0103161	0.00252525	0.00779857	0.00501054	0.00852273	f	0.951724	f	1	f	1
chr1	136130650	136132609	CGI762	92	0.555377	0.616828	1759	5.23024	Adora1	"NM_001039510,NM_001008533"	exon	0.0117606	0.0230137	0.00623439	0.00463217	0.00981515	0.00763846	f	0.872689	m	1	m	0.99039
chr1	136140654	136141109	CGI763	15	0.647128	0.607843	255	5.88235			intergenic	0.0712858	0.0189934	0.00308642	0.00326797	0.00595238	0	m	0.633621	f	1	m	0.480598
chr1	136194886	136196346	CGI764	71	0.580387	0.626984	1260	5.63492	Ppfia4	"NM_001144855"	exon	0.0284423	0.0178137	0.00407407	0.0107086	0.0214772	0	m	0.943941	f	0.78159	m	0.00966107
chr1	136240613	136241621	CGI765	49	0.596429	0.638614	808	6.06436			intergenic	0.0168549	0.00242424	0.00727129	0.0114808	0.0143702	0.00340136	m	0.38172	f	0.925984	m	0.495547
chr1	136257815	136258979	CGI766	85	0.957342	0.614108	964	8.81743	Tmem183a	"NM_020588,NM_001042485"	exon	0.00665415	0.00280413	0.00744536	0.00261643	0.00215578	0.00403361	m	0.87056	m	0.642183	f	1
chr1	136302323	136303082	CGI767	38	0.643914	0.654741	559	6.79785	Cyb5r1	"NM_028057"	exon	0.0035898	0.00812901	0.00859202	0.0202973	0.00265423	0.00535714	f	0.850467	f	0.593464	f	1
chr1	136311517	136312755	CGI768	95	0.855923	0.657033	1038	9.15222	Adipor1	"NM_028320"	exon	0.00894742	0.00606925	0.0104168	0.00492188	0.00633634	0.00684524	m	0.871327	m	0.814841	f	0.642954
chr1	136351628	136352552	CGI769	57	0.735008	0.656077	724	7.87293	Klhl12	"NM_153128"	exon	0.00810751	0.00764364	0.0133517	0.00543412	0.00208333	0	m	0.944793	m	0.784558	m	0.642306
chr1	136390973	136391791	CGI770	54	0.819689	0.653722	618	8.73786	Rabif	"NM_145510"	exon	0.00684632	0.00945851	0.00822665	0.00727969	0.00659613	0.00609695	f	0.93155	m	0.940376	m	1
chr1	136409697	136410574	CGI771	43	0.707537	0.599705	677	6.35155			intergenic	0.0045098	0.00133333	0.00606494	0.00488304	0.00789992	0.00792779	m	0.898371	m	0.929919	f	0.75944
chr1	136452650	136453737	CGI772	59	0.626759	0.656144	887	6.65163			intergenic	0.00547731	0.00975559	0.0086072	0.00908557	0.0035119	0.00757576	f	0.794615	f	0.736092	f	0.887375
chr1	136456363	136458276	CGI773	153	0.766689	0.692353	1713	8.9317	Kdm5b	"NM_152895"	exon	0.00652796	0.00382325	0.00658106	0.00503642	0.00358089	0.00513325	m	0.772493	m	0.894875	f	0.781528
chr1	136542703	136544127	CGI774	97	0.710846	0.668301	1224	7.92484	Syt2	"NM_009307"	exon	0.00579705	0.0148168	0.00808789	0.00822872	0.00671031	0.00606061	f	0.431055	f	0.92246	m	1
chr1	136605269	136606360	CGI775	57	0.602889	0.652076	891	6.39731	Syt2	"NM_009307"	intron	0.0136291	0.0162065	0.00547775	0.00445024	0	0.00292398	f	0.638321	m	1	f	0.642306
chr1	136606440	136607022	CGI776	17	0.522262	0.596859	382	4.45026	Syt2	"NM_009307"	intron	0.0265211	0.0633627	0.0226867	0.00404858	0.0365981	0.0078125	f	0.841889	m	0.67366	m	0.41043
chr1	136643916	136644534	CGI777	20	0.637557	0.550239	418	4.78469	Syt2	"NM_009307"	exon	0.0870865	0.125638	0.0170452	0.00289855	0.0291866	0.0108696	f	1	m	0.602914	m	0.305436
chr1	136851719	136852827	CGI778	53	0.640006	0.60793	908	5.837	Ppp1r12b	"NM_001081307"	exon	0.00768205	0.00425061	0.00874079	0.0109519	0.0115434	0.00291896	m	0.927843	f	0.92472	m	0.610905
chr1	136858592	136859528	CGI779	47	0.774715	0.574728	736	6.38587	Ube2t	"NM_026024"	exon	0.00640574	0.00696195	0.0121957	0.00760532	0.00622294	0.00835859	f	1	m	0.883157	f	0.892115
chr1	136883731	136884957	CGI780	60	0.553639	0.651072	1026	5.84795	Lgr6	"NM_001033409"	exon	0.0434474	0.0783536	0.0106156	0.00693646	0	0.0088925	f	0.574627	m	1	f	0.184884
chr1	136981815	136982322	CGI781	21	0.641292	0.667752	307	6.84039	Lgr6	"NM_001033409"	intron	0.0170426	0.005	0.00396825	0	0.00796364	0	m	0.725359	m	0.78159	m	0.354356
chr1	137001198	137002266	CGI782	64	0.711631	0.652074	868	7.37327	Lgr6	"NM_001033409"	exon	0.0074641	0.00859545	0.0084464	0.00453346	0.00325964	0	f	1	m	0.867022	m	0.482788
chr1	137042873	137044594	CGI783	145	0.855083	0.672584	1521	9.5332	Arl8a	"NM_026823"	exon	0.0112661	0.00332896	0.00319121	0.00804134	0.00382747	0.00334467	m	0.416339	f	0.662391	m	0.895176
chr1	137057484	137058020	CGI784	14	0.43625	0.619048	336	4.16667	Gpr37l1	"NM_134438"	exon	0.218828	0.240694	0.00348384	0.00622059	0.0138176	0	f	0.888775	f	0.895631	m	0.174548
chr1	137154829	137155223	CGI785	11	0.604071	0.618557	194	5.6701	Elf3	"NM_007921,NM_001163131"	exon	0.00947712	0.00666667	0.0259259	0	0.00446429	0	m	0.91343	m	0.58402	m	0.642306
chr1	137155581	137155954	CGI786	10	0.732348	0.566474	173	5.78035			intergenic	0	0.00595238	0	0	0.0148148	0.00694444	f	0.795906	-	NA	m	0.809624
chr1	137179684	137181064	CGI787	90	0.711961	0.655085	1180	7.62712	Rnpep	"NM_145417,NM_001159624"	exon	0.0114729	0.0104383	0.0111185	0.00487385	0.00329408	0.00285358	m	1	m	0.787232	m	0.874334
chr1	137209776	137210732	CGI788	51	0.749594	0.600529	756	6.74603	Timm17a	"NM_011590"	exon	0.00709803	0.0142923	0.00349253	0.00505604	0.00712669	0.00123457	f	0.868935	f	0.78159	m	0.375732
chr1	137264821	137265496	CGI789	26	0.73931	0.545263	475	5.47368			intergenic	0.00333333	0	0.0030506	0.00173611	0.00885417	0	m	0.797064	m	0.90048	m	0.493878
chr1	137270913	137272153	CGI790	52	0.495524	0.641346	1040	5	Shisa4	"NM_175259"	exon	0.0089794	0.00450408	0.00320402	0.00452586	0.0114019	0.00143678	m	0.835263	f	1	m	0.148852
chr1	137326192	137327547	CGI791	84	0.840793	0.599134	1155	7.27273	Ipo9	"NM_153774"	exon	0.0115957	0.00404606	0.00522594	0.00644696	0.00620569	0.00462185	m	0.556211	f	0.787297	m	0.575871
chr1	137406628	137407708	CGI792	41	0.576148	0.569318	880	4.65909	Nav1	"NM_173437"	intron	0.00652357	0.0212276	0.0102233	0.00528846	0.0217534	0	f	0.57043	m	0.76626	m	0.217068
chr1	137481054	137482623	CGI793	95	0.705853	0.634039	1369	6.93937	Nav1	"NM_173437"	exon	0	0.00475126	0.00512336	0.00875918	0.00508127	0.00338624	f	0.452927	f	1	m	0.714014
chr1	137583799	137585377	CGI794	95	0.713838	0.621916	1378	6.89405			intergenic	0.00511604	0.0045734	0.00796205	0.00541521	0.00558123	0.00720618	m	0.915861	m	1	f	0.830853
chr1	137595465	137596269	CGI795	28	0.589752	0.561258	604	4.63576			intergenic	0.00894688	0.00630252	0.0053329	0.00536881	0.0167243	0.0015625	m	0.658785	f	0.926413	m	0.0641726
chr1	137625494	137626191	CGI796	34	0.680467	0.635815	497	6.84105	Csrp1	"NM_007791"	exon	0.0259846	0	0.00955084	0.00102564	0	0.00465587	m	0.0793796	m	0.6724	f	0.480598
chr1	137662016	137663655	CGI797	110	0.716905	0.653926	1439	7.6442	Phlda3	"NM_013750"	exon	0.0191377	0.0141877	0.00780965	0.00663043	0.0101639	0	m	0.937063	m	0.904065	m	0.098612
chr1	137690206	137690692	CGI798	13	0.53255	0.611888	286	4.54545			intergenic	0.003125	0.0290179	0.0078125	0	0.00392157	0.010989	f	0.78888	m	0.78159	f	0.806753
chr1	137714625	137716060	CGI799	83	0.697593	0.621053	1235	6.72065	Lad1	"NM_133664"	exon	0.0212334	0.00686844	0.0108093	0.00551175	0.007637	0.00533109	m	0.433434	m	0.998481	m	0.632119
chr1	137814997	137816213	CGI800	74	0.666667	0.661417	1016	7.28346	Pkp1	"NM_019645"	exon	0.00789101	0.00884826	0.00435921	0.0134729	0.011812	0.00268065	f	0.796155	f	0.474158	m	0.262823
chr1	137903905	137904573	CGI801	25	0.639665	0.57906	468	5.34188			intergenic	0.0221705	0.0030303	0.00350877	0.00740741	0.00444444	0.00444444	m	0.283045	f	1	-	1
chr1	137914446	137915002	CGI802	21	0.624339	0.648876	356	5.89888	Tmem9	"NM_001160145,NM_025439,NM_001160146"	exon	0.00961538	0.00219298	0.00737179	0	0.00277778	0	m	0.891012	m	0.6724	m	0.642306
chr1	137946975	137948440	CGI803	69	0.593277	0.607905	1265	5.45455	Ascl5	"NM_001270609"	exon	0.00674748	0.00572162	0.00517466	0.00630342	0.00888725	0.00274927	m	0.950659	f	1	m	0.642306
chr1	138001769	138002603	CGI804	33	0.521426	0.632492	634	5.20505	Cacna1s	"NM_001081023,NM_014193"	exon	0.117829	0.137025	0.0212262	0.0276772	0.041472	0.00173611	f	0.915409	f	0.78159	m	0.0133793
chr1	138027594	138028944	CGI805	85	0.68354	0.658261	1150	7.3913	6530439I21,Kif21b	"NR_046170,NR_046169,NR_046168,NR_046167","NM_001039472"	exon	0.0109396	0.010191	0.0121054	0.00270563	0.00648531	0.0100115	m	0.832595	m	0.648557	f	0.861963
chr1	138036624	138037319	CGI806	30	0.616816	0.628283	495	6.06061	Kif21b	"NM_001039472"	intron	0.0203125	0.0100848	0.00574449	0	0.0104984	0.00706845	m	0.94516	m	0.6724	m	0.627937
chr1	138112243	138113087	CGI807	37	0.551283	0.650621	644	5.74534	5730559C18Rik	"NM_028872"	exon	0.236071	0.209869	0.0129279	0.0160465	0.061255	0.00599013	m	0.902223	f	0.944967	m	0.000579747
chr1	138121736	138122199	CGI808	14	0.538469	0.631179	263	5.32319	5730559C18Rik	"NM_028872"	exon	0.286336	0.265895	0.00606061	0.00505051	0.0665399	0.00454545	m	0.826083	m	0.904065	m	0.0023536
chr1	138130380	138131388	CGI809	56	0.708341	0.62995	808	6.93069	5730559C18Rik	"NM_028872"	exon	0.0199693	0.0189138	0.0144968	0.0193966	0.0138273	0.00347594	m	0.861904	f	0.937228	m	0.671021
chr1	138155921	138157768	CGI810	138	0.762894	0.663024	1647	8.37887	Gpr25	"NM_001101516"	exon	0.00882576	0.0122288	0.00709938	0.00385056	0.00728788	0.00915603	f	0.885199	m	0.6724	f	0.89268
chr1	138241651	138243392	CGI811	139	0.93914	0.620376	1541	9.02012	Camsap2	"NM_001081360"	exon	0.00328862	0.00639328	0.00671155	0.0110232	0.0076706	0.00565895	f	0.766926	f	0.904065	m	0.754402
chr1	138311419	138312443	CGI812	78	0.95577	0.629854	824	9.46602	9230116N13Rik,Ddx59	"NR_024328","NM_026500"	exon	0.0132595	0.00900419	0.0050007	0.00467314	0.00315629	0.0114469	m	0.856915	m	0.930072	f	0.882137
chr1	138362519	138363461	CGI813	57	0.830039	0.614555	742	7.68194			intergenic	0.00571429	0.0142848	0.0140957	0.00684524	0.0042636	0.00260943	f	0.658785	m	0.869437	m	0.690358
chr1	138501936	138502320	CGI814	13	0.964343	0.548913	184	7.06522			intergenic	0.157076	0.0934602	0.00392157	0.0114815	0.0474524	0.00555556	m	0.635295	f	0.78159	m	0.0879734
chr1	138520934	138522789	CGI815	134	0.77921	0.646526	1655	8.09668	Zfp281	"NM_177643,NM_001160251"	exon	0.0137572	0.0120345	0.0116489	0.00481067	0.00615403	0.00475746	m	0.794615	m	0.500399	m	0.423322
chr1	138566981	138567410	CGI816	12	0.587495	0.606987	229	5.24017			intergenic	0.0300457	0.0477241	0.00892857	0	0.00880682	0.0152699	f	1	m	0.78159	f	1
chr1	138678186	138678708	CGI817	14	0.577528	0.549689	322	4.34783			intergenic	0.0104895	0.0955526	0.0226211	0.0057598	0.0102554	0.00892857	f	0.184063	m	0.6724	m	0.831694
chr1	138685565	138686359	CGI818	36	0.776258	0.563973	594	6.06061			intergenic	0.15725	0.0920788	0.0040095	0.00490356	0.0261401	0.00619369	m	0.588922	f	1	m	0.295401
chr1	138843672	138844128	CGI819	12	0.605665	0.558594	256	4.6875	Nr5a2	"NM_030676,NM_001159769"	intron	0.00207039	0	0.0047619	0.00676937	0	0	m	0.794615	f	0.904065	-	NA
chr1	138845044	138846090	CGI820	60	0.703723	0.640662	846	7.0922	Nr5a2	"NM_030676,NM_001159769"	exon	0.00715449	0.0064153	0.00785104	0.00795626	0.0026478	0.00356178	m	0.963837	f	0.895631	f	0.882892
chr1	138848647	138849925	CGI821	53	0.608632	0.569573	1078	4.91651	Nr5a2	"NM_030676,NM_001159769"	exon	0.00650587	0.00764039	0.00556057	0.00567676	0.00132161	0.0031348	f	0.944793	f	0.94512	f	1
chr1	139322315	139322704	CGI822	18	1.28963	0.544974	189	9.52381			intergenic	0.356845	0.614774	0.047619	0.203968	0.0248413	0.105612	f	0.157218	f	0.122419	f	0.344913
chr1	140515505	140516638	CGI823	87	0.854135	0.66881	933	9.32476	Nek7	"NM_021605"	exon	0.00333498	0.00678996	0.00425725	0.0151003	0.00512018	0.00120773	f	0.645059	f	0.508757	m	0.489681
chr1	140727916	140728335	CGI824	13	0.82375	0.538813	219	5.93607	Lhx9	"NM_010714,NM_001042577,NM_001025565"	exon	0.0166667	0.00892857	0	0	0.0234375	0.00606061	m	1	-	NA	m	0.804643
chr1	140734808	140735348	CGI825	19	0.6357	0.594118	340	5.58824	Lhx9	"NM_010714,NM_001042577,NM_001025565"	exon	0.0530067	0.0224742	0.0152085	0.0157688	0	0.00681818	m	0.475221	f	0.893719	f	0.480598
chr1	140736376	140736927	CGI826	14	0.494386	0.57265	351	3.9886	Lhx9	"NM_010714,NM_001042577,NM_001025565"	exon	0.0151786	0.0224213	0.00510204	0.00625	0.0195286	0.00390625	f	0.877171	f	1	m	0.567344
chr1	140737959	140738728	CGI827	45	0.82809	0.618629	569	7.90861	Lhx9	"NM_010714,NM_001042577,NM_001025565"	exon	0.0233549	0.00945683	0.0109983	0.0171426	0.00596647	0.0117101	m	0.339568	f	1	f	0.859562
chr1	140739969	140740623	CGI828	25	0.664741	0.577093	454	5.50661	Lhx9	"NM_010714"	intron	0.00722496	0.00462038	0.00892857	0.0112479	0.0142432	0	m	1	f	1	m	0.253799
chr1	140744536	140745787	CGI829	52	0.547967	0.601332	1051	4.94767			intergenic	0.0087004	0.0117598	0.0100498	0.00784086	0.0127909	0.00518341	f	0.795257	m	0.942985	m	0.383799
chr1	140752977	140753641	CGI830	55	0.912354	0.728448	464	11.8534	2310009B15Rik	"NM_001081226"	exon	0.0261111	0	0	0.00398671	0.00385433	0.00877193	m	0.583271	f	0.78159	f	1
chr1	140859536	140860985	CGI831	115	0.866131	0.655725	1249	9.20737	Dennd1b	"NM_001166501"	exon	0.00630614	0.0115189	0.0118497	0.00636395	0.00925462	0.00705845	f	0.878012	m	0.529328	m	0.77433
chr1	141318163	141319533	CGI832	93	0.816487	0.625641	1170	7.94872	Zbtb41	"NM_172643"	exon	0.00372279	0.00922286	0.00314188	0.0105101	0.00425846	0.00211214	f	0.403589	f	0.704928	m	0.489004
chr1	141351012	141352238	CGI833	69	0.748923	0.601365	1026	6.72515	Aspm	"NM_009791"	exon	0.00716329	0.00910937	0.0124578	0.00413261	0.00899786	0.00552967	f	0.835263	m	0.78159	m	0.480598
chr1	142142068	142142778	CGI834	25	0.594078	0.580392	510	4.90196			intergenic	0.0198292	0.00686813	0.00287356	0.0112554	0.00807823	0.00431034	m	0.794615	f	0.738659	m	0.797637
chr1	145549086	145550718	CGI835	135	0.991137	0.624302	1432	9.42737	Cdc73	"NM_145991"	exon	0.00549062	0.00426667	0.0108375	0.0119805	0.00495742	0.00452835	m	0.777154	f	1	m	0.642306
chr1	145586244	145587404	CGI836	72	0.841343	0.601042	960	7.5	Glrx2	"NM_001038593,NM_001038592,NM_023505"	exon	0.00641043	0.00913954	0.00622138	0.000904159	0.00307414	0.00764306	f	0.942095	m	0.465415	f	0.642306
chr1	145623427	145625290	CGI837	136	0.807542	0.636801	1663	8.17799	Trove2,Uchl5	"NM_013835","NM_019562,NM_001159866"	exon	0.00693298	0.00432509	0.00386214	0.00344977	0.00630167	0.0168689	m	0.873389	m	0.813652	f	0.687392
chr1	145850953	145851812	CGI838	54	0.835915	0.629742	659	8.19423	Rgs2	"NM_009061"	exon	0.012277	0.015887	0.0093324	0.00440868	0.00392157	0.0020202	f	0.903753	m	0.922209	m	1
chr1	146800845	146801221	CGI839	8	0.631036	0.539773	176	4.54545			intergenic	0.209537	0.34935	0.0263106	0.0570124	0.0252454	0	f	0.333648	f	1	m	0.106835
chr1	148344395	148344811	CGI840	9	0.53144	0.574074	216	4.16667	Fam5c	"NM_153539"	intron	0	0	0	0	0.00378788	0	-	NA	-	NA	m	0.642954
chr1	148344896	148345369	CGI841	15	0.564568	0.626374	273	5.49451	Fam5c	"NM_153539,NM_001145807"	intron	0.0105263	0.00787879	0.0166667	0.005	0.00729167	0.00357143	m	0.907337	m	0.895631	m	0.806753
chr1	148571927	148572296	CGI842	28	1.0259	0.816568	169	16.568	Fam5c	"NM_153539,NM_001145807"	intron	0	0.0238095	0	0	0.0201587	0	f	0.665464	-	NA	m	0.266772
chr1	151704414	151704792	CGI843	6	0.623713	0.466292	178	3.37079	Pla2g4a	"NM_008869"	exon	0.237501	0.26859	0	0.00384615	0.00833333	0.0042735	f	0.884472	f	0.78159	m	0.647962
chr1	151946666	151947551	CGI844	33	0.518555	0.610219	685	4.81752	7530420F21Rik,Ptgs2	"NR_015466","NM_011198"	exon	0.014316	0.0106209	0.00749577	0.0164622	0.00493624	0.00296946	m	0.934055	f	0.78159	m	1
chr1	152239709	152241099	CGI845	103	0.854746	0.636975	1190	8.65546	BC003331,Tpr	"NM_145511,NM_001077237","NM_133780"	exon	0.00906264	0.00335351	0.00731547	0.00679325	0.00557387	0.00346908	m	0.745396	m	0.935714	m	1
chr1	152840226	152841023	CGI846	36	0.630859	0.619765	597	6.03015	Hmcn1	"NM_001024720"	exon	0.00536251	0.00772201	0.00834076	0.00583538	0.00853711	0	f	0.901618	m	0.94468	m	0.354356
chr1	153191012	153192709	CGI847	161	0.945381	0.680027	1497	10.7548	Ivns1abp	"NM_054102,NM_001039512,NM_001039511"	exon	0.00494452	0.00408236	0.00538727	0.00729961	0.00674297	0.00927404	m	0.949873	f	0.961121	f	1
chr1	153274979	153276394	CGI848	98	0.794883	0.638683	1215	8.06584	1190005F20Rik,Swt1	"NM_026876","NM_025819"	exon	0.0107721	0.00365377	0.0059017	0.00730342	0.00569621	0.00161875	m	0.493621	f	0.95821	m	0.372788
chr1	153347054	153348542	CGI849	145	0.880249	0.716615	1288	11.2578	Rnf2	"NM_011277"	exon	0.00817383	0.00749888	0.00513811	0.00978553	0.00867229	0.00909883	m	0.923503	f	0.86143	f	0.814408
chr1	153407657	153408026	CGI850	10	0.7989	0.556213	169	5.91716			intergenic	0.0613341	0.0437984	0.00790514	0.0106061	0.0284993	0.00478469	m	0.915806	f	1	m	0.629633
chr1	153418183	153419081	CGI851	43	0.614287	0.63467	698	6.16046	Fam129a	"NM_022018"	exon	0.00125156	0.00575689	0.00260047	0.00604464	0.00221868	0.00278867	f	0.660237	f	0.908008	f	1
chr1	153601968	153603308	CGI852	88	0.734106	0.653509	1140	7.7193	Edem3	"NM_001039644"	exon	0.00533491	0.00980617	0.00694284	0.00729532	0.00266093	0.00545579	f	0.658785	f	0.970667	f	0.642954
chr1	153936638	153938481	CGI853	129	0.675875	0.682288	1643	7.85149	1700025G04Rik	"NM_197990"	exon	0.0081381	0.0116704	0.0111551	0.00520419	0.00666822	0.00738916	f	0.902406	m	0.908008	f	1
chr1	154122048	154122474	CGI854	15	0.876239	0.553097	226	6.63717			intergenic	0.544344	0.573112	0.0739171	0.135055	0.0381404	0.0957391	f	0.898674	f	0.594264	f	0.801035
chr1	154233221	154234101	CGI855	58	0.855659	0.632353	680	8.52941	Tsen15	"NM_025677"	exon	0.0127451	0.00654762	0.00117096	0.00238095	0.00692641	0.001443	m	0.946333	f	1	m	0.486662
chr1	154246832	154247927	CGI856	72	0.764633	0.649162	895	8.04469	Glt25d2	"NM_177756"	exon	0.00381929	0.0046936	0.00642857	0.00840693	0.0078472	0.00618337	f	0.934522	f	0.78159	m	0.838248
chr1	154471596	154472870	CGI857	67	0.742373	0.580074	1074	6.23836	Rgl1	"NM_016846"	exon	0.0138043	0.0107204	0.00943627	0.00425662	0.00210402	0.0026455	m	0.66519	m	0.8623	f	0.646141
chr1	154577859	154578214	CGI858	4	0.385916	0.529032	155	2.58065			intergenic	0.293296	0.272312	0.0117851	0.0260256	0.0736264	0	m	0.9122	f	0.896238	m	0.00897395
chr1	154612933	154614502	CGI859	151	0.942675	0.684441	1369	11.0299	Arpc5	"NM_026369"	exon	0.00470908	0.00623632	0.0151507	0.00370744	0.00642343	0.00472511	f	1	m	0.365162	m	0.480598
chr1	154748763	154751334	CGI860	200	0.832515	0.640236	2371	8.43526	Smg7	"NM_001160256,NM_001005507"	exon	0.0117177	0.00589762	0.00929044	0.00779542	0.00579815	0.00517385	m	0.900974	m	1	m	0.521612
chr1	154751716	154752088	CGI861	7	0.63075	0.511628	172	4.06977			intergenic	0.0251728	0.00714286	0.00714286	0.00588235	0.0160819	0	m	0.670859	m	1	m	0.354356
chr1	154801841	154803687	CGI862	94	0.681034	0.592953	1646	5.71081	Nmnat2	"NM_175460"	exon	0.0150615	0.0209803	0.00364194	0.0035837	0.00309278	0.00613073	f	0.983791	m	1	f	0.77753
chr1	154918733	154919106	CGI863	12	0.687317	0.641618	173	6.93642	Nmnat2	"NM_175460"	intron	0.163515	0.119422	0.0112745	0	0.00562092	0	m	0.811416	m	0.6724	m	0.480598
chr1	155032800	155033697	CGI864	43	0.607154	0.638451	697	6.1693	Lamc2	"NM_008485"	exon	0.00701916	0.00972222	0.00414886	0.0014881	0.00380291	0	f	0.88508	m	0.78159	m	0.480598
chr1	155178924	155180874	CGI865	138	0.718464	0.670286	1750	7.88571	Lamc1	"NM_010683"	exon	0.0067996	0.0064213	0.00963859	0.00870981	0.00504169	0.00144928	m	0.919537	m	0.939847	m	0.226538
chr1	155271909	155272870	CGI866	59	0.713609	0.659658	761	7.75296	Shcbp1l	"NM_001033162"	exon	0.0143034	0.00954586	0.00695847	0.00720141	0.014022	0.0031746	m	0.89822	f	1	m	0.222196
chr1	155333812	155335125	CGI867	100	0.903818	0.639712	1113	8.98473	Dhx9	"NM_007842"	exon	0.010491	0.00964132	0.00867584	0.00545865	0.00651644	0.00550283	m	0.960556	m	0.895631	m	0.69225
chr1	155396515	155397091	CGI868	28	0.751857	0.630319	376	7.44681	Npl	"NM_028749"	exon	0.0115855	0.0141788	0.0151682	0.00446429	0.00642593	0	f	1	m	0.6724	m	0.371463
chr1	155499887	155500483	CGI869	18	0.496253	0.616162	396	4.54545	Rgs8	"NM_026380"	exon	0.0146111	0.00363636	0.00235294	0.00363636	0.00380952	0.0122997	m	0.661068	f	1	f	0.579326
chr1	155587193	155587834	CGI870	33	0.787968	0.634921	441	7.48299	Rgs16	"NM_011267"	exon	0	0.00823681	0	0.00433125	0.00529279	0.00546001	f	0.545199	f	0.6724	f	0.874361
chr1	155746693	155748237	CGI871	105	0.760841	0.641369	1344	7.8125	Glul	"NM_008131"	exon	0.00374487	0.00385611	0.00169381	0.00284334	0.00106424	0.00461565	f	0.945956	f	1	f	0.550586
chr1	155881135	155881487	CGI872	4	0.533589	0.447368	152	2.63158			intergenic	0.227661	0.123682	0	0.00769231	0.478202	0	m	1	f	0.787741	m	0.00565897
chr1	156051693	156052884	CGI873	68	0.6938	0.633703	991	6.86176	Zfp648	"NM_001204908"	exon	0.0126536	0.00534827	0.00932826	0	0.00712017	0.0057971	m	0.727301	m	0.1508	m	0.354356
chr1	156245411	156246107	CGI874	20	0.431276	0.616935	496	4.03226	Cacna1e	"NM_009782"	exon	0.266014	0.200383	0.0643737	0.0195753	0.0134147	0.00266667	m	0.618994	m	0.187161	m	0.371011
chr1	156572688	156573201	CGI875	23	0.873814	0.58147	313	7.34824	Cacna1e	"NM_009782"	exon	0.0729328	0.0869065	0.0237086	0.00246914	0.003367	0.00185185	f	1	m	0.441434	m	1
chr1	156573464	156574528	CGI876	45	0.61364	0.585648	864	5.20833			intergenic	0.0140208	0.0139661	0.00141844	0.00329281	0.00450349	0.00661041	m	0.886931	f	0.895631	f	1
chr1	156646223	156646922	CGI877	34	0.577958	0.691383	499	6.81363			intergenic	0.167041	0.103344	0.0407648	0.00749559	0.00213675	0.0121978	m	0.406057	m	0.38215	f	0.633892
chr1	156731352	156731971	CGI878	21	0.608279	0.575179	419	5.01193			intergenic	0.0151114	0.022592	0	0.0136905	0	0.0156986	f	1	f	0.672562	f	0.258572
chr1	156876184	156876653	CGI879	14	0.625009	0.591078	269	5.20446			intergenic	0.0676161	0.0378587	0.00958995	0.00895062	0.0267817	0.00735294	m	0.532774	m	0.915172	m	0.33894
chr1	156906692	156907117	CGI880	12	0.699704	0.622222	225	5.33333			intergenic	0.01554	0.0207792	0.0267094	0	0.0273579	0.0128205	f	1	m	0.58402	m	0.410824
chr1	156929977	156931291	CGI881	90	0.700612	0.679533	1114	8.07899			intergenic	0.016112	0.0127977	0.00524691	0.0117308	0.00225469	0.00564236	m	1	f	0.78159	f	0.78661
chr1	156945014	156947086	CGI882	165	0.814627	0.658654	1872	8.8141	Ier5	"NM_010500"	exon	0.00594064	0.00615716	0.00862764	0.00809921	0.00469787	0.00655979	f	0.772631	m	1	f	0.817487
chr1	157005503	157006649	CGI883	89	0.842528	0.673362	946	9.40803	Stx6	"NM_021433"	exon	0.00754062	0.00375661	0.00521223	0.00530689	0.00189755	0.00894309	m	0.890288	f	0.879139	f	0.815887
chr1	157091011	157092374	CGI884	110	0.779117	0.697334	1163	9.4583			intergenic	0.00781693	0.0166272	0.00317199	0.0100085	0.00324675	0.00635684	f	0.677627	f	0.548985	f	0.863858
chr1	157263719	157264899	CGI885	84	0.738984	0.682653	980	8.57143	Xpr1	"NM_011273"	exon	0.00488117	0.00831362	0.00833103	0.00657372	0.00154321	0.000957854	f	0.79275	m	0.956086	m	0.950728
chr1	157404824	157406062	CGI886	86	0.791816	0.647399	1038	8.28516	Acbd6	"NM_028250,NM_026683,NM_001145781"	exon	0.01676	0.0080057	0.00689439	0.00497899	0.00696815	0.00300084	m	0.240444	m	0.961061	m	0.539793
chr1	157583320	157585504	CGI887	114	0.734055	0.55998	1984	5.74597	Lhx4	"NM_010712"	intron	0.00540991	0.00770594	0.00374966	0.00769761	0.0058562	0.00378151	f	0.90306	f	0.78159	m	0.620182
chr1	157587548	157590613	CGI888	190	0.728057	0.606632	2865	6.63176	Lhx4	"NM_010712"	exon	0.00684736	0.0059841	0.00613265	0.00624574	0.0072634	0.00460673	m	0.893004	f	0.795873	m	0.624467
chr1	157659262	157660698	CGI889	85	0.706715	0.627832	1236	6.87702	Qsox1	"NM_023268,NM_001024945"	exon	0.00723235	0.00791057	0.00582298	0.010115	0.00330836	0.00373563	f	1	f	0.6915	f	0.865945
chr1	157819574	157821034	CGI890	104	0.731831	0.673016	1260	8.25397	Cep350	"NM_001039184"	exon	0.00713873	0.00694444	0.00943598	0.0107007	0.00574736	0.00339463	m	1	f	1	m	0.496377
chr1	157882416	157883909	CGI891	115	0.820017	0.658933	1293	8.89404	Tor1aip1,Tor1aip2	"NM_144791,NM_001160018","NM_172843,NM_001160180,NM_001160182"	exon	0.00426506	0.0026057	0.00390573	0.00526297	0.00384167	0.00446276	m	0.794615	f	1	f	0.642954
chr1	157887813	157888271	CGI892	13	0.676115	0.554264	258	5.03876	Tor1aip2	"NM_001160182,NM_001160180,NM_172843,NM_001160181,NM_022329"	exon	0.00985798	0	0	0.0160171	0.00740741	0	m	0.690364	f	0.58402	m	0.642306
chr1	158134348	158135517	CGI893	63	0.60968	0.654283	969	6.50155	Fam163a	"NM_177838"	exon	0.0080092	0.00565852	0.00282721	0.00841842	0.00260063	0.00373134	m	0.931803	f	0.58402	f	1
chr1	158232818	158234062	CGI894	97	0.872318	0.654215	1044	9.29119	Tdrd5	"NM_001134741"	exon	0.01134	0.00703648	0.00732199	0.0132461	0.0015873	0.00355805	m	0.835263	f	0.58402	f	0.642306
chr1	158240748	158241458	CGI895	34	0.705002	0.635294	510	6.66667	Nphs2	"NM_130456"	exon	0.0373289	0.0148762	0.00891266	0.0134526	0.00870548	0	m	0.547896	f	0.927599	m	0.277669
chr1	158350637	158351393	CGI896	41	0.823789	0.598921	556	7.3741			intergenic	0.0193405	0.00933442	0.00902088	0.00731707	0.0109819	0.0129451	m	0.728874	m	0.9604	f	0.806753
chr1	158403880	158404782	CGI897	52	0.713819	0.645299	702	7.40741	Soat1	"NM_009230"	exon	0.00549842	0.00785773	0.00911402	0.00683102	0.00329457	0.00209644	f	0.861393	m	1	m	0.642306
chr1	158488316	158489853	CGI898	118	0.807971	0.677636	1337	8.82573	Abl2	"NM_009595,NM_001136104"	exon	0.0191487	0.0103651	0.0060506	0.00779019	0.00891057	0.00775	m	0.794615	f	0.8981	m	0.671314
chr1	158597270	158597732	CGI899	15	0.740161	0.561069	262	5.72519	Tor3a	"NM_023141"	intron	0.135153	0.133844	0	0.0127465	0	0	m	0.984254	f	0.6724	-	NA
chr1	158603531	158604963	CGI900	62	0.563047	0.598214	1232	5.03247	Tor3a	"NM_023141"	exon	0.00845402	0.000732601	0.00848259	0.0101807	0.00536841	0.0144097	m	0.215495	f	0.78159	f	1
chr1	158648328	158649715	CGI901	115	0.889767	0.676495	1187	9.68829	Fam20b	"NM_145413"	exon	0.00773283	0.00700548	0.00562338	0.00602099	0.0025641	0.00288018	m	0.9779	f	1	f	1
chr1	158678523	158678913	CGI902	10	0.577753	0.605263	190	5.26316			intergenic	0.12772	0.142262	0	0	0.0451423	0.00925926	f	0.884686	-	NA	m	0.180038
chr1	158682365	158682803	CGI903	9	0.661858	0.483193	238	3.78151			intergenic	0.0375203	0.0277743	0.00480769	0	0.0173421	0	m	0.94421	m	0.78159	m	0.165503
chr1	158868741	158870460	CGI904	180	0.978492	0.697169	1519	11.8499	Ralgps2	"NM_001159967,NR_027640,NM_001159965,NM_023884,NM_001159966,NM_001159968"	exon	0.00704365	0.00932484	0.00627839	0.00868165	0.00581184	0.00388031	f	1	f	1	m	0.268491
chr1	159006394	159006762	CGI905	6	0.530631	0.52381	168	3.57143			intergenic	0.0101786	0.0440191	0.0106838	0	0.00641026	0.0147059	f	0.666686	m	0.6724	f	0.785264
chr1	159007305	159007896	CGI906	29	0.831425	0.598465	391	7.41688			intergenic	0.184552	0.129455	0.0201531	0.0156308	0.00725624	0.0158333	m	0.775559	m	1	f	0.806753
chr1	159341679	159343232	CGI907	147	0.918666	0.688101	1353	10.8647	2810025M15Rik,Rasal2	"NR_027984","NM_177644"	exon	0.00565006	0.00475208	0.00602586	0.00488651	0.00914986	0.00770503	m	0.902223	m	0.938962	m	0.480598
chr1	159388470	159388859	CGI908	11	0.537566	0.666667	189	5.82011	BC026585	"NM_001033284"	exon	0	0.0212963	0	0	0.00367647	0	f	0.579608	-	NA	m	0.719429
chr1	160285737	160286805	CGI909	55	0.7102	0.597926	868	6.33641	Fam5b	"NM_207583"	exon	0.00354421	0.000877193	0.00569119	0.00833406	0.00103199	0.00466127	m	0.894333	f	0.894742	f	0.491324
chr1	160292549	160293251	CGI910	30	0.589525	0.641434	502	5.9761	Astn1	"NM_001205204,NM_007495"	exon	0.0114583	0.0131076	0	0.00537634	0.00533397	0.0166667	f	1	f	0.78159	f	0.914175
chr1	160866002	160866510	CGI911	15	0.605889	0.568182	308	4.87013	Pappa2	"NM_001085376"	exon	0.280747	0.20294	0.0608697	0.0190909	0.0298718	0.0120399	m	0.501042	m	0.58402	m	0.620182
chr1	161161773	161163281	CGI912	143	1.00093	0.661315	1308	10.9327	Rfwd2	"NM_011931"	exon	0.00480726	0.002921	0.0103866	0.0014678	0.00720935	0.00421941	m	1	m	0.453508	m	0.64024
chr1	161600984	161601335	CGI913	9	0.666696	0.609272	151	5.96026	Tnr	"NM_022312"	intron	0.142253	0.114602	0.0116071	0.025641	0.0132331	0	m	0.80066	f	0.925809	m	0.480598
chr1	161974285	161974999	CGI914	29	0.573851	0.632296	514	5.64202	4930523C07Rik	"NR_028111,NM_001162896"	exon	0.0124115	0.0114416	0.0142929	0.0031746	0.00338622	0.00238095	m	1	m	0.534619	m	0.807391
chr1	162076002	162076614	CGI915	22	0.53394	0.635922	412	5.33981	Tnn	"NM_177839"	exon	0.195325	0.210342	0.00907954	0	0.0134829	0.00511509	f	0.823884	m	0.500399	m	0.642306
chr1	162124934	162125811	CGI916	38	0.651644	0.587888	677	5.613	Mrps14	"NM_025474"	exon	0.0120858	0.0126016	0.00987069	0.00872136	0.0095648	0.00147059	f	0.895042	m	0.825692	m	0.484431
chr1	162142313	162143749	CGI917	111	0.919611	0.625405	1236	8.98058	Cacybp	"NM_009786"	exon	0.00894383	0.00706614	0.00458294	0.00841972	0.00421438	0.00380015	m	0.858792	f	0.714797	m	0.905738
chr1	162281875	162282354	CGI918	12	0.531316	0.587814	279	4.30108	Rabgap1l	"NM_013862"	intron	0.00793651	0	0.00510204	0	0.0700724	0	m	0.795144	m	0.78159	m	0.00714353
chr1	162721955	162723509	CGI919	127	0.82699	0.674298	1354	9.37962	Rabgap1l	"NM_013862"	exon	0.0098688	0.0110632	0.00703986	0.0196625	0.00499608	0.00609983	f	1	f	0.50639	f	0.804643
chr1	162836015	162837457	CGI920	111	0.766751	0.690821	1242	8.9372	Rc3h1	"NM_001024952"	exon	0.00713306	0.00199916	0.00960436	0.00263129	0.0127416	0.0036313	m	0.570935	m	0.721038	m	0.52093
chr1	162964262	162965893	CGI921	100	0.758234	0.619846	1431	6.98812	Gas5,Zbtb37	"NR_002840","NM_173424"	exon	0.00491959	0.0105656	0.00628826	0.00272109	0.00664576	0.0014881	f	0.577966	m	0.601958	m	0.439914
chr1	163000172	163001395	CGI922	62	0.799165	0.55132	1023	6.06061	Cenpl,Dars2	"NM_001159930,NM_027429","NM_172644"	exon	0.00630362	0.0106884	0.00642972	0.000762777	0.0076555	0.00933264	f	0.881221	m	0.521166	f	0.859722
chr1	163061082	163061883	CGI923	31	0.615138	0.584027	601	5.15807	Klhl20	"NM_001039482"	exon	0.0096978	0.00725624	0.00337961	0.00285714	0.006354	0.00238095	m	0.926252	m	0.895631	m	0.499474
chr1	163072580	163073256	CGI924	29	0.709388	0.588235	476	6.09244	Ankrd45	"NM_028664"	exon	0.00757576	0.00804979	0.00245098	0.003848	0.00269493	0.00460829	f	0.693705	f	0.895631	f	0.835031
chr1	163100623	163101301	CGI925	42	0.824444	0.654812	478	8.78661	Ankrd45	"NM_028664"	exon	0.0105909	0.00885068	0.00656169	0.0031746	0.00238892	0.00901876	m	0.973886	m	0.690114	f	1
chr1	163180540	163181661	CGI926	69	0.765984	0.628664	921	7.49186	Prdx6	"NM_007453"	exon	0.00581941	0.00265152	0.00553266	0.00329416	0.0139053	0.0126634	m	0.765415	m	1	m	0.803649
chr1	163643027	163643399	CGI927	7	0.757848	0.47093	172	4.06977			intergenic	0.16893	0.0533704	0	0	0.0762664	0.0190476	m	0.201971	-	NA	m	0.349682
chr1	163806190	163807372	CGI928	87	0.838442	0.658859	982	8.85947	Suco	"NM_172645"	exon	0.0040293	0.0108085	0.00527647	0.0061305	0.00991123	0.00653738	f	0.684085	f	0.94427	m	0.5405
chr1	163899014	163899783	CGI929	40	0.750545	0.613357	569	7.02988	4930558K02Rik,Pigc	"NM_001204905,NM_001204904","NM_026078,NM_001039045"	exon	0.00469589	0.00791704	0.00265781	0.00230311	0.00359911	0.0135659	f	0.829137	m	1	f	1
chr1	164407264	164408508	CGI930	58	0.575594	0.623563	1044	5.55556	Dnm3	"NM_172646,NM_001038619"	exon	0.0206577	0.0118647	0.00100806	0.00978836	0.00464744	0	m	0.931506	f	0.67366	m	0.361216
chr1	164478229	164478986	CGI931	43	0.793455	0.624776	557	7.71993	Mettl13	"NM_144877"	exon	0.00486111	0.0173743	0.00245098	0.00305135	0.00374072	0.00449173	f	0.460002	f	1	f	0.877104
chr1	164500293	164501844	CGI932	110	0.863547	0.6151	1351	8.14212	Vamp4	"NM_016796"	exon	0.0101572	0.00574156	0.00619114	0.00683183	0.00683741	0.00534207	m	0.647048	f	1	m	1
chr1	164578808	164579286	CGI933	13	0.646648	0.539568	278	4.67626	7420461P10Rik,Myoc	"NM_001177581","NM_010865"	exon	0.201671	0.134012	0.0160164	0.00328947	0.033208	0.00956938	m	0.455134	m	0.67366	m	0.437157
chr1	164669815	164671037	CGI934	94	0.893368	0.642857	1022	9.19765	Prrc2c	"NM_001081290"	exon	0.00397321	0.00291659	0.0104424	0.00950519	0.00255102	0.00447214	m	0.862507	m	1	f	0.480598
chr1	165238777	165239157	CGI935	20	1.11974	0.633333	180	11.1111	Prrx1	"NM_175686,NM_011127,NM_001025570"	intron	0.00347222	0	0.0214286	0.00231481	0.00740132	0	m	0.794615	m	0.6724	m	0.480598
chr1	165241805	165242944	CGI936	61	0.650571	0.640043	939	6.49627	Prrx1	"NM_175686,NM_011127,NM_001025570"	exon	0.0102913	0.00935314	0.00312569	0.00226757	0.00117096	0.00330688	m	1	m	0.78159	f	0.806753
chr1	165245030	165245497	CGI937	18	0.620379	0.662921	267	6.74157			intergenic	0.00649351	0.0104167	0.0109217	0.00231481	0.00587121	0.00384615	f	1	m	0.760281	m	0.860717
chr1	165333493	165334239	CGI938	29	0.612828	0.589744	546	5.31136	Gorab	"NM_178883"	exon	0	0.00189394	0.00681818	0.00189394	0.00373737	0.00108225	f	0.794615	m	0.895631	m	0.794596
chr1	165709406	165710285	CGI939	45	0.684167	0.622975	679	6.62739	Kifap3	"NM_010629"	exon	0.0078161	0.00823284	0.00782313	0.00541862	0.00880682	0.00145773	f	1	m	1	m	0.642306
chr1	165859709	165860993	CGI940	88	0.788883	0.642989	1084	8.11808	Scyl3	"NM_028776"	exon	0.00525986	0.00608466	0.00446822	0.00706146	0.00833661	0.00370851	f	1	f	1	m	0.642306
chr1	165924296	165925453	CGI941	69	0.894238	0.572623	957	7.21003	BC055324,Mettl18	"NM_201364","NM_027279"	exon	0.00326954	0.00856181	0.00414265	0.00448148	0.00334169	0.0027027	f	0.658785	f	0.927142	m	0.814564
chr1	166178549	166179994	CGI942	116	0.884944	0.655422	1245	9.31727	Slc19a2	"NM_054087"	exon	0.00532241	0.00803074	0.00707121	0.00613553	0.00636166	0.0021809	f	1	m	1	m	0.456938
chr1	166205481	166206197	CGI943	32	0.646328	0.624031	516	6.20155	4930455F23Rik	"NM_029115"	exon	0.00767906	0	0.0221445	0	0.00428983	0.00287356	m	0.545199	m	0.517029	m	0.683235
chr1	166236949	166238121	CGI944	47	0.668759	0.538066	972	4.83539	Blzf1,Nme7	"NM_001160209,NM_001160208,NM_025505","NM_178071,NM_138314"	exon	0.00464107	0.00979597	0.00722915	0.00140056	0.00645185	0.00381264	f	0.792015	m	0.78159	m	0.730959
chr1	166387509	166389307	CGI945	136	0.756323	0.67209	1598	8.51064	Atp1b1	"NM_009721"	exon	0.00480627	0.0038027	0.00600869	0.00284052	0.00523797	0.00999219	m	0.937266	m	0.78159	f	0.642508
chr1	166829144	166829615	CGI946	12	0.468433	0.630996	271	4.42804			intergenic	0	0.0206398	0	0.0120529	0.0118679	0.00250627	f	0.658785	f	0.58402	m	0.61786
chr1	167050523	167051362	CGI947	33	0.698715	0.544601	639	5.16432			intergenic	0.0540404	0.061362	0.00714286	0.00519481	0.0116667	0.004329	f	1	m	1	m	0.840048
chr1	167123864	167124900	CGI948	72	0.794737	0.662679	836	8.61244	Sft2d2	"NM_145512"	exon	0.00606523	0.00767603	0.0122348	0.00813681	0.0104816	0.00690131	f	0.951755	m	0.812724	m	0.625216
chr1	167166296	167167640	CGI949	84	0.830915	0.597028	1144	7.34266	Tiprl	"NM_145513"	exon	0.00511464	0.00521669	0.00891348	0.00582422	0.00232669	0.00577201	f	0.873713	m	0.86655	f	1
chr1	167211439	167213005	CGI950	102	0.710688	0.661054	1366	7.46706			intergenic	0.0111023	0.00225564	0.0143015	0.00564139	0.00210064	0.00540729	m	0.916399	m	0.817751	f	0.689908
chr1	167389529	167391943	CGI951	174	0.759387	0.644083	2214	7.85908	Dcaf6,Mpc2	"NM_028759","NM_027430"	exon	0.00652535	0.00998283	0.0070339	0.00681183	0.0061295	0.00243326	f	0.951087	m	1	m	0.533072
chr1	167563960	167565082	CGI952	81	0.741183	0.701735	922	8.78525	Mpzl1	"NM_001083897,NM_001001880"	exon	0.00772114	0.0101421	0.0127907	0.00686991	0.008728	0.00468541	f	0.942095	m	0.895631	m	0.620446
chr1	167571853	167573221	CGI953	81	0.836062	0.577911	1168	6.93493			intergenic	0.00473856	0.00803332	0.00613434	0.00872701	0.00774505	0	f	0.795906	f	0.78159	m	0.120178
chr1	167637702	167638554	CGI954	46	0.659279	0.654908	652	7.05521	Rcsd1	"NM_178593,NM_001038846"	exon	0.0110931	0.00482913	0.00151515	0.00374134	0.00365829	0.0118041	m	0.963924	f	0.70263	f	0.822148
chr1	167693588	167694567	CGI955	58	0.785759	0.616175	779	7.44544	Creg1	"NM_011804"	exon	0.011571	0.00722135	0.00897639	0.0106966	0.00326394	0.00530914	m	0.898371	f	1	f	0.902397
chr1	167770910	167771428	CGI956	22	0.682559	0.638365	318	6.91824	Cd247	"NM_031162,NM_001113392,NM_001113391,NM_001113394,NM_001113393"	intron	0.00274725	0.00790816	0.00170068	0.00238095	0.00420168	0.00595238	f	0.794615	f	1	f	1
chr1	167774887	167775803	CGI957	38	0.557898	0.617318	716	5.30726	Cd247	"NM_031162,NM_001113392,NM_001113391,NM_001113394,NM_001113393"	intron	0.0167323	0.00500541	0.0026455	0.0113772	0.0161797	0.0102165	m	0.658785	f	0.686209	m	0.847805
chr1	167931398	167933964	CGI958	237	0.906292	0.669484	2366	10.0169	Pou2f1	"NM_011137,NM_198932"	exon	0.0117919	0.0121258	0.0133941	0.0165693	0.010671	0.00205357	f	1	f	1	m	0.172105
chr1	167973452	167973962	CGI959	20	0.803315	0.567742	310	6.45161			intergenic	0.146186	0.110499	0	0.00501961	0.0480447	0.00977193	m	0.865206	f	0.6724	m	0.091014
chr1	167977894	167978526	CGI960	21	0.858402	0.476852	432	4.86111			intergenic	0.0132164	0.0175374	0.00923077	0.002	0.0099359	0.00462963	f	0.894333	m	1	m	0.806753
chr1	168030504	168030993	CGI961	16	0.635363	0.608997	289	5.53633	Dusp27	"NM_001160049,NM_001033344"	exon	0.0950212	0.178869	0.044595	0.0290326	0.00697451	0.0129552	f	0.530336	m	1	f	0.849019
chr1	168068411	168068827	CGI962	10	0.641836	0.546296	216	4.62963	Gpa33	"NM_021610"	intron	0.115112	0.105593	0	0.00416667	0.00446999	0	m	0.984566	f	0.78159	m	0.480598
chr1	168090707	168091066	CGI963	7	0.636389	0.528302	159	4.40252	Gpa33	"NM_021610"	intron	0.00730769	0.0279174	0.00416667	0.00367647	0	0	f	0.888989	m	1	-	NA
chr1	168168400	168169206	CGI964	53	0.749909	0.684818	606	8.74587	Mael	"NM_175296"	exon	0.447386	0.533062	0.0207623	0.0433909	0.0356557	0.0326541	f	0.517415	f	0.6724	m	0.61688
chr1	168183829	168185213	CGI965	73	0.705133	0.594595	1184	6.16554	Ildr2	"NM_001164528"	exon	0.011468	0.00584772	0.0133597	0.0103916	0.00312295	0.00166667	m	0.667162	m	0.614115	m	0.813977
chr1	168212791	168213209	CGI966	14	0.674899	0.623853	218	6.42202	Ildr2	"NM_001164528"	intron	0.00280112	0.00452489	0.022027	0.00280112	0.00255754	0.00452489	f	1	m	0.6724	f	1
chr1	168238590	168239919	CGI967	99	0.851319	0.643047	1129	8.76882	Ildr2	"NM_001164528"	exon	0.00468444	0.00652844	0.011454	0.0110727	0.00636093	0.00988095	f	1	m	1	f	1
chr1	168308680	168310408	CGI968	139	0.879554	0.646597	1528	9.09686	Tada1	"NM_030245"	exon	0.00606443	0.00945558	0.00464873	0.00905854	0.00694057	0.00597959	f	0.975337	f	0.890774	m	1
chr1	168339136	168340397	CGI969	95	0.793848	0.672008	1061	8.95382	Pogk	"NM_175170,NM_001142948"	exon	0.0164676	0.0155437	0.00116959	0.0108145	0.00333498	0	m	0.951283	f	0.409238	m	0.397126
chr1	168930536	168932978	CGI970	206	0.799187	0.679304	2242	9.18822	Fam78b	"NM_175461,NM_001160262,NM_001160261"	exon	0.0151146	0.00971359	0.00760993	0.00767793	0.00874726	0.00714869	m	0.658785	f	0.950756	m	0.596497
chr1	169213654	169215913	CGI971	172	0.80703	0.644488	2059	8.35357	Uck2	"NM_030724"	exon	0.00618799	0.00357415	0.00853226	0.00716828	0.00410284	0.00642501	m	0.757643	m	0.687816	f	1
chr1	169238235	169239353	CGI972	87	0.946056	0.633987	918	9.47712	Tmco1	"NM_001039483"	exon	0.0106374	0.00816602	0.00694144	0.00816776	0.0109318	0.00226244	m	0.794615	f	0.740545	m	0.14834
chr1	169270053	169270991	CGI973	47	0.773427	0.574526	738	6.36856			intergenic	0.020845	0.00901084	0.010101	0.00423862	0	0.0190637	m	0.919537	m	1	f	0.480598
chr1	169279900	169280886	CGI974	57	0.686212	0.652672	786	7.25191	Aldh9a1	"NM_019993"	exon	0.00471688	0.00490741	0.0111046	0.00609085	0.0110237	0	f	1	m	0.887134	m	0.088136
chr1	169323612	169324114	CGI975	20	0.680142	0.625828	302	6.62252	Mgst3	"NM_025569"	exon	0.0110294	0.00324675	0.0137801	0	0.00534759	0	m	0.898371	m	0.500399	m	0.482747
chr1	169323981	169324535	CGI976	19	0.783125	0.525424	354	5.36723			intergenic	0.0116947	0.00986334	0.00594177	0.0026738	0.00418709	0.003367	m	1	m	0.895631	m	0.642508
chr1	169375873	169376337	CGI977	14	0.687047	0.556818	264	5.30303	Lrrc52	"NM_001013382"	exon	0.204401	0.191874	0.071188	0.0188022	0.0305211	0.00477273	m	0.905517	m	0.139333	m	0.073011
chr1	169528311	169529204	CGI978	38	0.669732	0.580087	693	5.48341	Rxrg	"NM_009107"	exon	0.00562852	0.0049069	0.00350099	0.00874126	0.00634664	0.0052381	m	0.938662	f	1	m	0.727206
chr1	169548196	169548793	CGI979	15	0.475511	0.574307	397	3.77834	Rxrg	"NM_009107,NM_001159731"	exon	0.184127	0.113934	0	0.0129269	0.0200158	0.0119048	m	0.494851	f	0.58402	m	0.35473
chr1	169562239	169562949	CGI980	28	0.712446	0.556863	510	5.4902	Rxrg	"NM_009107,NM_001159731"	exon	0.0952656	0.135554	0.00444444	0.00555556	0.0789149	0.00952381	f	0.777787	f	0.900938	m	2.97708e-05
chr1	169590581	169590973	CGI981	12	0.741377	0.598958	192	6.25			intergenic	0.00793651	0.00606061	0.0121212	0	0	0.0047619	m	1	m	0.6724	f	0.642306
chr1	169591204	169591700	CGI982	17	0.564519	0.641892	296	5.74324			intergenic	0	0	0.00958333	0.015873	0.00277778	0	-	NA	f	0.896804	m	0.642306
chr1	169602735	169603250	CGI983	9	0.329437	0.590476	315	2.85714			intergenic	0.0903509	0.00774573	0.00328947	0.00526316	0.00292398	0.0133603	m	0.370637	f	1	f	0.786
chr1	169618247	169620429	CGI984	146	0.741593	0.630676	1982	7.3663	Lmx1a	"NM_033652"	exon	0.00639262	0.00459078	0.00794237	0.00977657	0.00701668	0.00629226	m	0.702885	f	0.908008	m	0.963578
chr1	169621931	169622714	CGI985	39	0.779575	0.586621	583	6.68954	Lmx1a	"NM_033652"	exon	0.00110742	0.00222222	0.00477818	0.00185185	0.00756373	0.00634921	f	1	m	0.78159	m	0.699139
chr1	169732734	169733867	CGI986	59	0.746948	0.59164	933	6.32369	Lmx1a	"NM_033652"	intron	0.00239277	0.0184085	0.00488215	0.00733993	0.00324859	0.00846561	f	0.278793	f	0.926888	f	0.717175
chr1	169859812	169860326	CGI987	24	0.740313	0.646497	314	7.64331			intergenic	0	0.0127929	0.00940171	0.0110083	0.00192308	0.0042735	f	0.334913	f	0.78159	f	1
chr1	170362597	170363014	CGI988	12	0.927679	0.493088	217	5.52995			intergenic	0.00793651	0	0.00260417	0.00277778	0	0	m	0.794615	f	1	-	NA
chr1	171461230	171461938	CGI989	36	0.872575	0.570866	508	7.08661	Nuf2	"NM_023284"	exon	0.00511015	0	0.00482625	0.00545738	0.00225225	0.00759583	m	0.659031	f	1	f	0.806753
chr1	171898857	171899693	CGI990	46	0.792376	0.608491	636	7.2327	3110045C21Rik,Hsd17b7	"NR_040438","NM_010476"	exon	0.00717593	0.00620946	0.00552411	0.00122549	0.00976889	0.00419719	m	1	m	0.618808	m	0.480598
chr1	172104308	172105817	CGI991	106	0.821079	0.629488	1309	8.09778	Uap1	"NM_133806"	exon	0.0111233	0.0105081	0.00736643	0.00355873	0.00515647	0.0129321	m	0.806185	m	0.66355	f	0.599753
chr1	172144761	172145710	CGI992	71	0.835768	0.674232	749	9.47931	Uhmk1	"NM_010633"	exon	0.00753822	0.00538839	0.00682364	0.00584215	0.00342052	0.0139173	m	0.892546	m	0.807683	f	0.362307
chr1	172185097	172186069	CGI993	59	0.71161	0.661917	772	7.64249			intergenic	0.0191134	0.0339124	0.0221529	0.00368852	0.0045137	0.00282486	f	0.822333	m	0.193797	m	0.642306
chr1	172519042	172520504	CGI994	120	0.857318	0.669572	1262	9.50872	Nos1ap	"NM_001109985"	exon	0.00694824	0.00530914	0.00431333	0.00600358	0.00569055	0.00440317	m	0.74308	f	0.894857	m	0.730303
chr1	172574201	172575116	CGI995	47	0.670627	0.633566	715	6.57343	Olfml2b	"NM_177068"	exon	0.0166122	0.00424263	0.00395928	0.0113664	0.00767974	0.0045	m	0.80323	f	0.763631	m	0.710646
chr1	172701658	172702016	CGI996	8	1.01927	0.449367	158	5.06329	Atf6	"NM_001081304"	intron	0.185881	0.14188	0.0111111	0	0.0184693	0	m	0.801246	m	0.672307	m	0.187901
chr1	172797241	172798189	CGI997	49	0.889744	0.553476	748	6.5508	Atf6	"NM_001081304"	exon	0.00374038	0.0105833	0.0235162	0.00104822	0.00471698	0.0042735	f	0.815298	m	0.509033	m	0.814894
chr1	172798692	172799222	CGI998	25	1.28775	0.5	330	7.57576			intergenic	0.0034965	0.00681004	0.0196857	0.0178221	0.00549451	0.00666667	f	0.946445	m	0.914608	f	1
chr1	172814861	172815810	CGI999	52	0.691442	0.634179	749	6.94259	Dusp12	"NM_023173"	exon	0.00752805	0.00347447	0.00476519	0.00281385	0.00434982	0.00416667	m	0.570935	m	0.915172	m	0.70018
chr1	172837322	172839153	CGI1000	114	0.731942	0.619252	1631	6.98958	Fcrlb	"NM_001029984"	exon	0.012689	0.015936	0.00628005	0.0150237	0.0041337	0.00665709	f	0.924336	f	0.726775	f	1
chr1	172963170	172963561	CGI1001	8	0.792591	0.465969	191	4.18848			intergenic	0.0122482	0.00512821	0.0204327	0.00961538	0	0	m	0.820447	m	0.895631	-	NA
chr1	172963553	172964305	CGI1002	27	0.797599	0.5	552	4.8913			intergenic	0.00646706	0.00586487	0.0130834	0.0015949	0.00327135	0	m	1	m	0.500399	m	0.480598
chr1	172968091	172968791	CGI1003	35	1.14984	0.494	500	7			intergenic	0.0158522	0.00454545	0.0132536	0.0207641	0.0061032	0.00492732	m	0.574627	f	0.961227	m	0.880547
chr1	172974627	172975059	CGI1004	11	0.603354	0.564655	232	4.74138			intergenic	0	0.010101	0.0178571	0.0133333	0	0.00694444	f	0.794615	m	1	f	0.642306
chr1	172993784	172994284	CGI1005	22	0.999257	0.626667	300	7.33333			intergenic	0.0306682	0.0321735	0.00548315	0.00763809	0.00723377	0.00216608	f	0.874639	f	0.894057	m	0.675147
chr1	173008645	173009015	CGI1006	3	0.760026	0.352941	170	1.76471			intergenic	0.01875	0.0403135	0.0204082	0.0281614	0.0131944	0	f	0.87056	f	0.78159	m	0.580857
chr1	173015772	173016346	CGI1007	24	0.705887	0.606952	374	6.41711			intergenic	0.0348605	0	0.00210084	0	0.00746435	0	m	0.179052	m	0.78159	m	0.259796
chr1	173031859	173033110	CGI1008	61	0.742973	0.559467	1051	5.804			intergenic	0.00422852	0	0.00593792	0.00314844	0.00629436	0.00234316	m	0.658785	m	0.927131	m	0.480598
chr1	173040962	173041417	CGI1009	13	0.900447	0.478431	255	5.09804			intergenic	0.0637138	0.0111699	0.0114143	0	0	0.00400693	m	0.794615	m	0.58402	f	0.480598
chr1	173043858	173044496	CGI1010	25	0.633518	0.60274	438	5.70776			intergenic	0.00149925	0.00739267	0.0035958	0.00383142	0.00473397	0.00574713	f	0.666686	f	0.901606	f	0.642306
chr1	173080358	173080991	CGI1011	27	0.669068	0.612009	433	6.23557	Mpz,Sdhc	"NM_008623","NM_025321"	exon	0.00555556	0.00555556	0.0270895	0.00357143	0.0031746	0.00344828	f	0.898476	m	0.614115	f	1
chr1	173089797	173090345	CGI1012	19	0.635889	0.606322	348	5.45977	Mpz	"NM_008623"	exon	0.00843184	0	0.0145202	0.00740741	0.00260417	0	m	0.545199	m	0.938227	m	0.642306
chr1	173125874	173126483	CGI1013	32	0.664745	0.689487	409	7.82396	Pcp4l1	"NM_025557"	exon	0.0144635	0.00539486	0.0236621	0.00777735	0.00863026	0.00740741	m	0.778293	m	0.620763	m	0.863956
chr1	173151871	173152447	CGI1014	15	0.493201	0.571809	376	3.98936	Tomm40l	"NM_001037170"	exon	0.0254432	0.00869565	0.00724638	0.00483092	0	0	m	0.382006	m	1	-	NA
chr1	173164244	173164626	CGI1015	11	0.616747	0.631868	182	6.04396	Fcer1g	"NM_010185"	exon	0.341868	0.281776	0.00420168	0.0047619	0.0794164	0.0238095	m	0.794615	f	1	m	0.0790836
chr1	173176915	173177751	CGI1016	41	0.733296	0.597484	636	6.44654	Ndufs2	"NM_153064"	exon	0.00566138	0.00557992	0.00343915	0.00650794	0.0032967	0.00630719	m	1	f	0.823627	f	0.838434
chr1	173186620	173186997	CGI1017	11	0.61266	0.649718	177	6.21469	Adamts4	"NM_172845"	exon	0.176455	0.15933	0.04459	0.0335303	0.0181406	0.0238095	m	0.950239	m	0.927131	f	0.871903
chr1	173188876	173189281	CGI1018	8	0.439243	0.6	205	3.90244	Adamts4	"NM_172845"	exon	0.0930451	0.117816	0	0.00277778	0.0629527	0.00326797	f	0.783523	f	0.78159	m	0.0305484
chr1	173200161	173201143	CGI1019	49	0.640722	0.626598	782	6.26598	B4galt3	"NM_020579"	exon	0.00523103	0.00315904	0.0107621	0.00613956	0.00586957	0	m	0.929295	m	0.714512	m	0.480598
chr1	173210815	173211933	CGI1020	39	0.549389	0.556645	918	4.24837	Ppox	"NM_008911"	exon	0.00841512	0.00809179	0.00496032	0.0111862	0.0044479	0.00167224	m	0.794615	f	0.915172	m	0.642306
chr1	173217421	173218432	CGI1021	49	0.621455	0.633785	811	6.04192	Usp21	"NM_013919"	exon	0.0115385	0.00384101	0.00113122	0.00944303	0.0114698	0.0113172	m	0.914322	f	0.525324	m	0.666875
chr1	173224516	173225113	CGI1022	27	0.895506	0.554156	397	6.80101	Ufc1	"NM_025388"	exon	0.00313066	0.00416667	0.00809524	0.00555556	0.00132275	0	f	1	m	0.895631	m	0.642508
chr1	173258757	173260378	CGI1023	111	0.734142	0.663617	1421	7.8114	Dedd	"NM_011615,NM_001128609"	exon	0.00969829	0.0135236	0.00333333	0.0116183	0.0395096	0.0151905	f	0.808781	f	0.58402	m	0.45188
chr1	173275432	173276741	CGI1024	64	0.727273	0.571686	1109	5.77096	Nit1,Pfdn2	"NM_001242580,NM_012049","NM_011070"	exon	0.0205361	0.00707433	0.00984022	0.00794549	0.00551453	0.00565657	m	0.884581	m	0.938227	f	0.595507
chr1	173290141	173291327	CGI1025	58	0.69411	0.583164	986	5.88235	Klhdc9	"NM_001033039"	exon	0.0146242	0.0135082	0.00645373	0.00902515	0.00522659	0.00778689	m	0.949862	f	0.895631	f	1
chr1	173310054	173310786	CGI1026	28	0.586845	0.601504	532	5.26316	Pvrl4	"NM_027893,NM_001122680"	exon	0.015637	0.0119277	0.0125157	0.00195312	0.00979663	0.00195312	m	0.94899	m	0.449196	m	0.642306
chr1	173341197	173342588	CGI1027	88	0.791788	0.612091	1191	7.38875	Usf1	"NM_009480"	exon	0.00413479	0.00621179	0.00404456	0.00704132	0.00567783	0.00169062	f	0.898371	f	0.934165	m	0.409837
chr1	173367371	173368377	CGI1028	50	0.689179	0.600496	806	6.20347	F11r	"NM_172647"	exon	0.00466034	0.00979335	0.00453354	0.00240385	0	0.00361604	f	0.861237	m	0.78159	f	0.480598
chr1	173433354	173434586	CGI1029	75	0.867349	0.581395	1032	7.26744	Alyref2	"NM_019484"	exon	0.00281385	0.00926062	0.0057568	0.00744014	0.00755776	0.00377804	f	0.530416	f	0.801164	m	0.24176
chr1	173609740	173610257	CGI1030	23	0.703276	0.643533	317	7.25552			intergenic	0.243723	0.154236	0.0208974	0.0269569	0.010303	0.00557692	m	0.261748	f	0.78159	m	0.807637
chr1	173939496	173940302	CGI1031	34	0.613936	0.605611	606	5.61056	Vangl2	"NM_033509"	exon	0.246173	0.202022	0.00773874	0.00651201	0.0233581	0.0041958	m	0.74953	m	0.808509	m	0.098612
chr1	173943030	173943400	CGI1032	12	0.740285	0.629412	170	7.05882	Vangl2	"NM_033509"	exon	0.151103	0.160443	0.0105006	0.00637755	0.0489358	0.00190476	f	0.96809	m	1	m	0.0463319
chr1	173956512	173957799	CGI1033	71	0.612501	0.662374	1087	6.53174	Vangl2	"NM_033509"	exon	0.00460053	0.00905206	0.0101905	0.00575938	0.00923288	0.00695636	f	0.865689	m	1	m	0.487789
chr1	173983809	173984573	CGI1034	37	0.658386	0.634752	564	6.56028	Nhlh1	"NM_010916"	exon	0	0.00964458	0.00174216	0.00348432	0.00583563	0.0183865	f	0.339568	f	1	f	0.674178
chr1	174012542	174013458	CGI1035	48	0.720529	0.611732	716	6.70391	Copa,Ncstn	"NM_009938","NM_021607"	exon	0.00120192	0.00669643	0.00665726	0.00377747	0.00799076	0.00500408	f	0.664154	m	0.673417	m	0.781528
chr1	174056757	174057227	CGI1036	16	0.779306	0.588889	270	5.92593	Pex19	"NM_023041,NM_001159525"	exon	0.003663	0.015083	0.00536243	0	0.0025641	0.00641026	f	1	m	0.694657	f	1
chr1	174077868	174079136	CGI1037	79	0.803684	0.609551	1068	7.397	Dcaf8	"NM_153555"	exon	0.0151242	0.011823	0.0111446	0.00365028	0.00462565	0.00810142	m	0.897321	m	0.67366	f	1
chr1	174136239	174137184	CGI1038	41	0.524542	0.648322	745	5.50336	Pea15a	"NM_011063"	exon	0.00593786	0.00602968	0.0185143	0.00539811	0.0133865	0.0166667	f	0.949696	m	0.925973	f	0.511585
chr1	174174707	174175332	CGI1039	24	0.706472	0.569412	425	5.64706	Atp1a4	"NM_013734"	exon	0.0528301	0.0884218	0.0282029	0.00750518	0.015582	0.0025	f	0.794615	m	0.703542	m	0.193761
chr1	174240077	174240443	CGI1040	7	0.492021	0.590361	166	4.21687			intergenic	0	0	0	0	0.042661	0	-	NA	-	NA	m	0.128004
chr1	174242003	174243226	CGI1041	63	0.569834	0.657869	1023	6.15836	Igsf8	"NM_080419"	exon	0.00453995	0.00269034	0.0119017	0.00105042	0.00450511	0.00245098	m	0.929845	m	0.67366	m	0.822578
chr1	174248163	174248838	CGI1042	22	0.483787	0.621053	475	4.63158	Igsf8	"NM_080419"	exon	0.125954	0.118282	0.0101172	0.0169793	0.0489432	0.00378788	m	0.886979	f	0.915172	m	0.00156562
chr1	174255575	174257186	CGI1043	116	0.885918	0.609497	1411	8.22112	Kcnj9	"NM_008429"	exon	0.0462492	0.0501424	0.00363026	0.00858289	0.00898598	0.00487722	f	0.993286	f	0.78159	m	0.115483
chr1	174270786	174271733	CGI1044	48	0.713444	0.629183	747	6.4257	Kcnj10	"NM_001039484"	exon	0.017948	0.0105854	0.0110831	0.00419287	0.0113475	0	m	0.93408	m	0.683358	m	0.371509
chr1	174298960	174299687	CGI1045	22	0.539153	0.557875	527	4.17457	Kcnj10	"NM_001039484"	exon	0.0671592	0.0758659	0.0187488	0.00642174	0.0062987	0.013411	f	1	m	0.47563	f	0.94067
chr1	174299815	174300200	CGI1046	10	0.712665	0.556757	185	5.40541	Kcnj10	"NM_001039484"	exon	0.106967	0.141907	0.018055	0.025	0.039218	0.0166667	f	0.897964	f	0.892246	m	0.168836
chr1	174306244	174307840	CGI1047	115	0.883254	0.611032	1396	8.23782	Pigm	"NM_026234"	exon	0.00526202	0.0158911	0.00785933	0.00680815	0.00453673	0.00508067	f	0.658785	m	0.860312	f	0.95224
chr1	174322191	174322641	CGI1048	10	0.600488	0.556	250	4			intergenic	0.122739	0.0452392	0	0	0.0399987	0.00588235	m	0.313172	-	NA	m	0.0785891
chr1	174381154	174381506	CGI1049	10	0.724463	0.605263	152	6.57895			intergenic	0.0638447	0.0422247	0.00651042	0.0101461	0.0384158	0.0107736	m	0.900251	f	1	m	0.423212
chr1	174411791	174412573	CGI1050	39	0.689002	0.635739	582	6.70103	Igsf9	"NM_001145800,NM_033608"	exon	0.00932401	0.00760831	0.00437289	0.00421727	0.00733426	0	m	0.803715	m	1	m	0.354356
chr1	174420544	174420936	CGI1051	8	0.486466	0.598958	192	4.16667	Igsf9	"NM_001145800,NM_033608"	exon	0.0196277	0.052381	0.0227273	0.0180333	0.0211898	0.00694444	f	0.898371	m	0.791816	m	0.505537
chr1	174426023	174426595	CGI1052	20	0.574735	0.612903	372	5.37634	Igsf9	"NM_001145800,NM_033608"	exon	0.276139	0.17891	0.016622	0.00310559	0.0222015	0	m	0.620233	m	0.517224	m	0.110801
chr1	174430042	174431377	CGI1053	70	0.634683	0.623789	1135	6.1674	Tagln2	"NM_178598"	exon	0.0056506	0.00215169	0.0089668	0.00701194	0.00327173	0.00509295	m	0.751666	m	1	f	1
chr1	174450994	174451532	CGI1054	16	0.627348	0.58284	338	4.73373	Ccdc19	"NM_027972"	exon	0.003125	0.00555556	0	0	0.00333333	0	f	1	-	NA	m	0.642306
chr1	174456777	174457247	CGI1055	12	0.610254	0.540741	270	4.44444	Ccdc19	"NM_027972"	intron	0.110459	0.113662	0.0193066	0.00396825	0.0517016	0	f	1	m	0.6724	m	0.00201666
chr1	174462476	174463080	CGI1056	17	0.513196	0.576733	404	4.20792	Ccdc19	"NM_027972"	exon	0.0170452	0.00512821	0.00680473	0.00524476	0.0106838	0.0187377	m	0.794615	m	1	f	1
chr1	174474992	174475649	CGI1057	24	0.629412	0.582057	457	5.25164	4933439K11Rik,Ccdc19	"NR_040558","NM_027972"	exon	0.236934	0.299974	0.0553538	0.0306948	0.076719	0.0846178	f	0.692701	m	0.78159	f	1
chr1	174491938	174493871	CGI1058	104	0.614559	0.625505	1733	6.00115	Vsig8	"NR_027644,NM_177723"	exon	0.0122121	0.00554001	0.0104265	0.0029932	0.00806332	0.0120877	m	0.821377	m	0.57236	f	0.899492
chr1	174518817	174519178	CGI1059	12	1.1768	0.540373	161	7.45342	Slamf8	"NM_029084"	intron	0.182332	0.213081	0.00549451	0.010989	0.00786937	0	f	0.841224	f	0.895849	m	0.495887
chr1	174562557	174563425	CGI1060	48	0.682075	0.649701	668	7.18563	Dusp23	"NM_026725"	exon	0.00261438	0.003125	0.00513131	0.00418332	0.00392157	0.0109607	f	0.902958	m	1	f	1
chr1	174564726	174565201	CGI1061	12	0.589227	0.545455	275	4.36364			intergenic	0.0909596	0.0738861	0.00520833	0.0174279	0.00910027	0	m	0.912558	f	0.78159	m	0.354356
chr1	175296903	175298232	CGI1062	69	0.584571	0.647476	1129	6.1116	Cadm3	"NM_053199"	exon	0.00759707	0.00382775	0.0129211	0.00526316	0.0019305	0	m	0.820447	m	0.540335	m	0.645368
chr1	175642098	175642512	CGI1063	18	1.13028	0.649533	214	8.41121			intergenic	0.356627	0.380238	0	0.0119048	0.0833333		f	1	f	0.861283
chr1	176431703	176433894	CGI1064	119	0.588254	0.63787	1991	5.9769	Fmn2	"NM_019445"	exon	0.00850595	0.00817212	0.00503669	0.00712526	0.00415203	0.00543081	m	1	f	0.899495	f	0.827283
chr1	176766797	176767449	CGI1065	26	0.66769	0.588496	452	5.75221	Grem2	"NM_011825"	exon	0.363486	0.523181	0.00638889	0.0482968	0.0134117	0.0101143	f	0.00976898	f	0.123806	m	0.765695
chr1	176851464	176852144	CGI1066	26	0.611842	0.595833	480	5.41667	Grem2	"NM_011825"	exon	0.00416667	0.00724853	0.0102999	0.0037037	0.00201613	0.00598659	f	0.844864	m	0.692656	f	0.77753
chr1	177421687	177423124	CGI1067	97	0.692183	0.674212	1237	7.84155	Rgs7	"NM_011880,NM_001199003"	exon	0.00531182	0.00191872	0.0060351	0.0048502	0.00112233	0.00755834	m	0.57266	m	0.939854	f	0.786127
chr1	177555010	177556108	CGI1068	65	0.722223	0.63363	898	7.23831	Fh1	"NM_010209"	exon	0.00419799	0.00630275	0.00261905	0.0061173	0.00238587	0.0102499	f	0.794615	f	0.918093	f	0.664853
chr1	177621945	177623353	CGI1069	103	0.7547	0.673013	1208	8.52649	Opn3	"NM_010098"	exon	0.00210739	0.00631275	0.00354634	0.0121652	0.0077859	0.00801542	f	0.76504	f	0.604475	f	0.950915
chr1	177810471	177811537	CGI1070	67	0.846434	0.605081	866	7.73672	Exo1	"NM_012012"	exon	0.0112449	0.00621264	0.00570401	0.00365441	0.00548441	0	m	0.794615	m	0.92472	m	0.264023
chr1	178153351	178153712	CGI1071	10	0.75142	0.57764	161	6.21118	Pld5	"NM_176916"	intron	0.0195551	0.0522894	0	0.0145202	0	0.0087963	f	0.861082	f	0.6724	f	0.480598
chr1	178204614	178206028	CGI1072	98	0.753417	0.658155	1214	8.07249	Pld5	"NM_176916"	exon	0.0143115	0.00691865	0.00664571	0.00358793	0.00310284	0.0021322	m	0.722248	m	0.938045	m	0.913364
chr1	178655035	178655520	CGI1073	25	1.12849	0.57193	285	8.77193			intergenic	0.420797	0.176048	0.0159933	0.0212963	0.00925926	0.00737179	m	0.012101	f	0.894742	m	0.900137
chr1	178743262	178745315	CGI1074	138	0.752157	0.630869	1853	7.44738	Sdccag8	"NM_029756"	exon	0.00768375	0.00423698	0.00824835	0.00421165	0.00843248	0.00546157	m	0.794615	m	0.78159	m	0.521397
chr1	178765449	178766093	CGI1075	33	0.710385	0.648649	444	7.43243	Hmga2-ps1,Sdccag8	"NR_037996","NM_029756"	exon	0.00136054	0.0140809	0.018188	0	0.00577201	0.0061828	f	0.658785	m	0.415546	f	1
chr1	178923783	178924191	CGI1076	9	0.5763	0.552885	208	4.32692	Sdccag8	"NM_029756"	intron	0.30937	0.12338	0.0215686	0	0.465688	0	m	0.203173	m	0.6724	m	0.000442056
chr1	178927961	178928546	CGI1077	18	0.529093	0.602597	385	4.67532	Sdccag8	"NM_029756"	intron	0.045653	0.0801439	0.00757576	0.0138907	0.0228929	0.0223064	f	0.547896	f	0.62899	m	0.606098
chr1	179187180	179189448	CGI1078	214	0.795955	0.721954	2068	10.3482			intergenic	0.0105953	0.0106837	0.00996781	0.0117319	0.00816346	0.00592186	f	0.926374	f	0.938962	m	0.686461
chr1	179252759	179253477	CGI1079	40	0.899055	0.594595	518	7.72201			intergenic	0.00725678	0.0264992	0.00592827	0.00495212	0.00744285	0.00577201	f	0.666144	m	1	m	0.719198
chr1	179268865	179269445	CGI1080	22	0.628434	0.607895	380	5.78947			intergenic	0.00986086	0.0193041	0.00512901	0.00344828	0.00866174	0.00229885	f	0.994105	m	0.895631	m	0.480598
chr1	179371451	179373776	CGI1081	253	0.941433	0.711529	2125	11.9059			intergenic	0.00790765	0.00566362	0.00773795	0.00434483	0.00276591	0.00171958	m	0.898371	m	0.754529	m	0.817698
chr1	179378101	179378781	CGI1082	26	0.601021	0.602083	480	5.41667	Zfp238	"NM_013915,NM_001012330"	exon	0.161359	0.22078	0.0172384	0.0229377	0.0436515	0.0109668	f	0.545199	f	0.78159	m	0.0724766
chr1	179429116	179429601	CGI1083	13	0.68624	0.522807	285	4.5614			intergenic	0.160726	0.0993641	0.0307018	0.0164474	0.0255013	0	m	0.442278	m	1	m	0.170321
chr1	179725809	179727152	CGI1084	97	0.747199	0.67629	1143	8.48644	Adss	"NM_007422"	exon	0.00507413	0.00522441	0.00589854	0.015907	0.00300408	0.00317916	f	1	f	0.419615	f	0.919965
chr1	179913119	179913981	CGI1085	55	0.733335	0.673716	662	8.30816			intergenic	0.00755947	0.00834025	0	0.00394933	0.00584007	0.00714286	f	0.940457	f	0.58402	f	1
chr1	180073222	180073588	CGI1086	15	0.878979	0.644578	166	9.03614			intergenic	0.351836	0.259202	0.025	0.0211976	0.00812129	0.00983796	m	0.339568	m	1	f	0.892012
chr1	180117339	180118241	CGI1087	59	0.748036	0.67094	702	8.40456	Desi2	"NM_024282"	exon	0.00925418	0.00393864	0.0113702	0.00942657	0.00457793	0.00664945	m	0.684479	m	0.999108	f	1
chr1	180205753	180207208	CGI1088	100	0.839348	0.620717	1255	7.96813			intergenic	0.0232355	0.0113105	0.00832192	0.00728863	0.00719752	0.00620155	m	0.654838	m	0.829926	m	0.557374
chr1	180248147	180249558	CGI1089	109	0.904311	0.634187	1211	9.00083	Fam36a	"NM_025511"	exon	0.0078373	0.00466173	0.005257	0.00746695	0.0135179	0.00631224	m	1	f	0.974276	m	0.642306
chr1	180266360	180268315	CGI1090	214	0.994985	0.712821	1755	12.1937	Hnrnpu	"NM_016805"	exon	0.00412099	0.00675505	0.00465927	0.00791624	0.00855329	0.00719646	f	0.93323	f	0.899456	m	0.834391
chr1	180298620	180299510	CGI1091	36	0.641698	0.572464	690	5.21739			intergenic	0.00666001	0.002849	0.00854701	0.0128386	0.00840132	0	m	0.67903	f	0.777094	m	0.287496
chr1	180335658	180336901	CGI1092	87	0.767862	0.659636	1043	8.34132	Efcab2	"NM_026626"	exon	0.0109067	0.0140906	0.00396876	0.00708996	0.00784858	0.00520833	f	1	f	0.904065	m	0.598463
chr1	180457314	180461259	CGI1093	280	0.742714	0.634713	3745	7.47664	Kif26b	"NM_001161665"	exon	0.00729958	0.00769051	0.0100847	0.00587784	0.00310367	0.00378132	f	0.92614	m	0.805206	f	0.846623
chr1	180847329	180848332	CGI1094	39	0.4852	0.635118	803	4.85679	Kif26b	"NM_001161665"	exon	0.112202	0.0570895	0.0135461	0.00633117	0.0459326	0.00243902	m	0.10416	m	0.833429	m	0.0194603
chr1	181447246	181448374	CGI1095	46	0.666002	0.55819	928	4.9569	Smyd3	"NM_027188"	exon	0.00702475	0.00648148	0.00469248	0.00391584	0.00110988	0.00495356	m	0.941688	m	1	f	0.793653
chr1	181475711	181477238	CGI1096	121	0.956118	0.62095	1327	9.11831	Cnst,Tfb2m	"NM_146105","NM_008249"	exon	0.00744101	0.00351294	0.00571775	0.00556523	0.0139901	0.00344753	m	0.645541	m	0.890774	m	0.00211765
chr1	181521780	181522155	CGI1097	8	0.686182	0.531429	175	4.57143	Cnst	"NM_146105"	intron	0.292547	0.128862	0	0.00478469	0.557857	0.00568182	m	0.138171	f	0.78527	m	0.0012186
chr1	181597606	181598968	CGI1098	104	0.873275	0.641997	1162	8.95009	Sccpdh	"NM_178653"	exon	0.00458744	0.00238095	0.00641737	0.00327228	0.00608941	0.00284512	m	0.695659	m	0.6724	m	0.480598
chr1	181732861	181734322	CGI1099	145	1.0251	0.674068	1261	11.4988	Ahctf1	"NM_026375"	exon	0.00814816	0.00504746	0.00897089	0.00719549	0.00500288	0.00436296	m	0.747532	m	0.885176	m	0.642306
chr1	181889157	181890961	CGI1100	169	0.922329	0.678304	1604	10.5362			intergenic	0.0118664	0.00563428	0.00413459	0.00757641	0.00692814	0.00659601	m	0.658785	f	0.917709	m	0.836166
chr1	182125517	182126517	CGI1101	57	0.792657	0.6	800	7.125	Adck3	"NM_023341"	exon	0.00499132	0.00848024	0.0137045	0.00367993	0.0042559	0.0015625	f	0.96055	m	0.624915	m	0.493837
chr1	182156026	182156500	CGI1102	15	0.824187	0.532847	274	5.47445			intergenic	0.005	0.0109649	0	0.0138462	0.00238095	0.00714286	f	0.794615	f	0.58402	f	1
chr1	182180173	182180576	CGI1103	10	0.485726	0.64532	203	4.92611	Psen2	"NM_001128605"	intron	0.00717787	0.0190476	0.00357143	0.0238095	0.0115955	0.00930372	f	1	f	1	m	1
chr1	182185832	182186830	CGI1104	63	0.695994	0.675439	798	7.89474	Psen2	"NM_001128605"	exon	0.0120247	0.0073825	0.00996908	0.0114364	0.00551378	0.00558442	m	0.940457	f	0.894875	f	0.761063
chr1	182219564	182219985	CGI1105	12	0.592012	0.61086	221	5.42986			intergenic	0.070604	0.124603	0.102109	0.0291141	0.0259129	0.00952381	f	0.502751	m	0.410625	m	0.304813
chr1	182260533	182263158	CGI1106	164	0.667593	0.636701	2425	6.76289	Gm5069,Itpkb	"NR_003623","NM_001081175"	exon	0.00623192	0.00468372	0.00836441	0.00674827	0.00543801	0.00516026	m	1	m	0.813183	m	0.783316
chr1	182295206	182296040	CGI1107	29	0.626618	0.542587	634	4.57413	Itpkb	"NM_001081175"	intron	0.00646946	0.00246305	0.00844988	0	0.00240385	0.00613839	m	0.814938	m	0.6724	f	0.806753
chr1	182317498	182318036	CGI1108	16	0.523153	0.618343	338	4.73373	Itpkb	"NM_001081175"	intron	0.0034965	0.00396825	0.00783812	0.0164773	0.00479798	0.00292398	f	1	f	1	m	0.860717
chr1	182333691	182334249	CGI1109	17	0.570059	0.578212	358	4.7486	Itpkb	"NM_001081175"	intron	0.186277	0.141764	0.0122222	0	0.0121429	0.0105576	m	1	m	0.58402	m	0.878061
chr1	182351779	182352178	CGI1110	12	0.603333	0.648241	199	6.03015	Itpkb	"NM_001081175"	exon	0.0655863	0.0428241	0	0	0.0235718	0	m	0.895736	-	NA	m	0.157623
chr1	182412712	182414004	CGI1111	66	0.581056	0.647436	1092	6.04396	6330403A02Rik	"NM_001081227"	exon	0.0117364	0.00811815	0.00202337	0.00501306	0.0090716	0.000961538	m	0.881339	f	0.838583	m	0.332812
chr1	182413923	182414590	CGI1112	18	0.612034	0.503212	467	3.85439			intergenic	0.0148948	0.0163549	0.0147392	0.0174603	0.00608974	0.004329	f	0.93267	f	0.940495	m	0.811341
chr1	182498716	182499733	CGI1113	77	0.881023	0.657283	817	9.42472	Parp1	"NM_007415"	exon	0.00672267	0.0107152	0.0155713	0.0136615	0.00827854	0.00582011	f	0.691182	m	0.918403	m	0.780465
chr1	182570577	182572331	CGI1114	160	0.85911	0.69305	1554	10.296	Lin9	"NM_175186,NM_001103182"	exon	0.00572599	0.00686079	0.00706807	0.0109725	0.00808697	0.00578622	f	1	f	0.663019	m	0.935008
chr1	182626494	182627829	CGI1115	94	0.784254	0.65022	1135	8.28194	Mixl1	"NM_013729"	exon	0.0092619	0.00524716	0.00749535	0.00543723	0.00301484	0.00448718	m	0.940457	m	0.783989	f	0.833064
chr1	182655530	182656892	CGI1116	107	0.845388	0.660929	1162	9.20826	Acbd3	"NM_133225"	exon	0.00809958	0.00436357	0.00812907	0.00618464	0.00406163	0.00678727	m	0.658785	m	0.954538	f	0.889783
chr1	182693694	182694107	CGI1117	11	0.63623	0.58216	213	5.16432			intergenic	0	0.0103438	0	0	0	0.00480769	f	0.545199	-	NA	f	0.642508
chr1	182698258	182699007	CGI1118	30	0.567988	0.621129	549	5.46448			intergenic	0.00462963	0.0084843	0	0	0.0100605	0.00462963	f	0.794615	-	NA	m	0.499207
chr1	182707534	182708887	CGI1119	73	0.652887	0.623591	1153	6.33131			intergenic	0.00540646	0.00416667	0.00267094	0.00421455	0.00580217	0.00997151	m	0.867921	f	0.925809	f	0.897145
chr1	182724080	182724844	CGI1120	28	0.521804	0.618794	564	4.96454			intergenic	0.0109103	0.00626959	0.0112497	0.0233752	0.00914824	0	m	0.829899	f	1	m	0.253799
chr1	182742528	182744883	CGI1121	202	0.908263	0.642691	2155	9.37355	H3f3a	"NM_008210"	exon	0.0101673	0.00862743	0.0102415	0.0109209	0.00677634	0.00682796	m	0.993431	f	0.78159	f	0.600017
chr1	182760360	182760721	CGI1122	7	0.515474	0.583851	161	4.34783			intergenic	0.221787	0.176845	0.0112879	0.00877193	0.0342796	0.00757576	m	0.916399	m	0.791816	m	0.354356
chr1	182780456	182781698	CGI1123	82	0.834092	0.615163	1042	7.86948	Sde2	"NM_145943"	exon	0.00673401	0.00843731	0.00397531	0.00512237	0.0102501	0.00168067	f	0.898371	f	0.926634	m	0.12561
chr1	182824345	182825199	CGI1124	42	0.636807	0.642202	654	6.42202	Lefty2	"NM_177099"	exon	0.00774793	0.0128785	0.0147207	0.00685018	0.00390307	0.0123512	f	0.960556	m	0.802459	f	0.869932
chr1	182833884	182835111	CGI1125	60	0.71475	0.574489	1027	5.84226	Pycr2	"NM_133705"	exon	0.0126782	0.00471225	0.0128093	0.0035002	0.00639098	0.0015873	m	0.559718	m	0.392465	m	0.642306
chr1	182866753	182867595	CGI1126	35	0.647814	0.580997	642	5.45171	Lefty1	"NM_010094"	exon	0.0173602	0.00610501	0.00140056	0	0.0200363	0.00462963	m	0.70035	m	0.78159	m	0.499147
chr1	182871842	182873443	CGI1127	92	0.701885	0.613133	1401	6.56674	Tmem63a	"NM_144794"	exon	0.0146853	0.00678246	0.0027852	0.00585305	0.00731168	0.00715812	m	0.433853	f	0.78159	m	1
chr1	182873412	182873854	CGI1128	3	0.170171	0.541322	242	1.23967	Tmem63a	"NM_144794"	intron	0.0934343	0.0312851	0.00854701	0.0282569	0.100369	0.0283951	m	0.72492	f	0.78159	m	0.614136
chr1	182947227	182947777	CGI1129	20	0.624838	0.605714	350	5.71429	Ephx1	"NM_010145"	exon	0.003663	0.00906593	0.00160256	0.0042735	0.0119048	0.00295858	f	0.898371	f	1	m	0.791238
chr1	183073817	183074928	CGI1130	58	0.836301	0.554336	911	6.36663	Nvl	"NM_026171"	exon	0.0117997	0.0059591	0.00490322	0.00329476	0.00295993	0	m	0.933053	m	0.927131	m	0.480598
chr1	183080808	183081704	CGI1131	58	0.799551	0.646552	696	8.33333	Cnih4	"NM_030131"	exon	0.00329567	0.0116397	0.0102872	0.00453995	0.00776836	0.00865913	f	0.820447	m	0.770464	f	1
chr1	183140772	183142866	CGI1132	180	0.743299	0.715945	1894	9.5037	Wdr26	"NM_145514"	exon	0.00877304	0.00901711	0.012664	0.010668	0.0020592	0.00456053	f	0.850735	m	0.922966	f	0.994049
chr1	183186552	183187194	CGI1133	21	0.512565	0.622172	442	4.75113			intergenic	0.00957043	0.0112496	0.0247619	0.024537	0.00255754	0	f	0.950776	m	1	m	0.642306
chr1	183202894	183203415	CGI1134	15	0.571265	0.573209	321	4.6729			intergenic	0.0146634	0.0117647	0.00501253	0.00228833	0	0	m	0.957631	m	1	-	NA
chr1	183282108	183284020	CGI1135	109	0.633721	0.63493	1712	6.36682	Cnih3	"NM_001160212,NM_001160211,NM_028408"	exon	0.00436732	0.00458829	0.00654006	0.0045068	0.00559653	0.00393939	f	0.890288	m	0.773842	m	0.480598
chr1	183440411	183441095	CGI1136	19	0.496393	0.568182	484	3.92562	Ccdc121	"NM_207280"	exon	0.0996181	0.139188	0.0499341	0.0188824	0.0494107	0.00724638	f	0.798412	m	0.783989	m	0.0889663
chr1	183475418	183475841	CGI1137	14	0.975144	0.515695	223	6.27803			intergenic	0.0420932	0.0466315	0.00326797	0.00653595	0	0.00309598	f	0.893004	f	1	f	0.642306
chr1	183771523	183773445	CGI1138	155	0.895374	0.639954	1722	9.00116	Lbr	"NM_133815"	exon	0.0108475	0.00361494	0.00919957	0.00512353	0.00411578	0.00122005	m	0.544038	m	0.58402	m	0.378093
chr1	183811564	183811970	CGI1139	4	0.235903	0.57767	206	1.94175			intergenic	0.0352814	0.021645	0	0	0.0270396	0.00757576	m	0.75125	-	NA	m	0.642306
chr1	183853443	183854003	CGI1140	24	0.791673	0.611111	360	6.66667	Enah	"NM_001083121,NM_010135,NM_001083120,NM_008680"	exon	0.0625196	0.176767	0.0101912	0.00231481	0.0249629	0.0160256	f	0.0853274	m	0.78159	m	0.284283
chr1	183949041	183951088	CGI1141	228	1.00345	0.701678	1847	12.3443	Enah	"NM_001083121,NM_010135,NM_001083120,NM_008680"	exon	0.0105902	0.00994637	0.0101941	0.0089588	0.00547353	0.00677527	m	0.889191	m	0.826448	f	1
chr1	184043214	184043614	CGI1142	9	0.553902	0.585	200	4.5			intergenic	0.218145	0.125817	0.0456585	0	0.0235362	0	m	0.323046	m	0.31181	m	0.248856
chr1	184054522	184055586	CGI1143	72	0.784938	0.653935	864	8.33333	Srp9	"NM_012058"	exon	0.00627457	0.00730234	0.00439796	0.00545425	0.00810689	0.00588901	f	0.978251	f	0.939854	m	0.476211
chr1	184212120	184213315	CGI1144	95	0.869071	0.663317	995	9.54774	Degs1	"NM_007853"	exon	0.00836617	0.00508503	0.00811265	0.00231211	0.00950699	0.00308957	m	0.794615	m	0.78159	m	0.642306
chr1	184270892	184272100	CGI1145	97	0.863505	0.668651	1008	9.62302	Fbxo28	"NM_175127"	exon	0.00710012	0.00763757	0.00790255	0.00650677	0.00599102	0.00535354	f	0.967414	m	0.895631	m	0.559341
chr1	184338516	184339909	CGI1146	115	0.854344	0.672255	1193	9.63956	Trp53bp2	"NM_173378"	exon	0.00791366	0.0154371	0.00749372	0.0092428	0.00493066	0.0040803	f	0.822706	f	0.915838	m	0.944065
chr1	184419849	184420303	CGI1147	15	0.671299	0.594488	254	5.90551	Capn2	"NM_009794"	exon	0.0145833	0.00690431	0	0	0.0154167	0	m	0.991595	-	NA	m	0.354356
chr1	184446855	184448097	CGI1148	93	0.793773	0.672745	1042	8.92514	Capn2	"NM_009794"	exon	0.00466165	0.00830076	0.00837083	0.00646617	0.00915933	0.00369674	f	0.636675	m	0.835746	m	0.493878
chr1	184677978	184678512	CGI1149	16	0.529911	0.610778	334	4.79042	4922505E12Rik	"NM_001033547"	exon	0.0968645	0.125934	0.0284864	0.0182647	0.0274347	0.00454545	f	0.927041	m	0.927131	m	0.257281
chr1	184678694	184679255	CGI1150	24	0.631217	0.65097	361	6.6482	4922505E12Rik	"NM_001033547"	exon	0.160872	0.274399	0.0163442	0.0160045	0.0043512	0.0118687	f	0.0268686	m	0.905325	f	0.815386
chr1	184693272	184695390	CGI1151	132	0.681808	0.636079	1918	6.88217	Susd4	"NM_144796"	exon	0.0137874	0.0104711	0.00807234	0.00401586	0.00377955	0.0111982	m	1	m	0.896238	f	0.515054
chr1	184884766	184885472	CGI1152	23	0.495035	0.606719	506	4.54545	Tlr5	"NM_016928"	exon	0.0337927	0.0160611	0.00387097	0.0047619	0	0.00595238	m	0.865689	f	1	f	0.642306
chr1	184890184	184890584	CGI1153	9	0.548196	0.575	200	4.5	Tlr5	"NM_016928"	intron	0.00346021	0.0117647	0.0234827	0.00534759	0.00995872	0	f	1	m	0.6724	m	0.354356
chr1	184913120	184913660	CGI1154	14	0.492372	0.579412	340	4.11765			intergenic	0.0231061	0.0408425	0.0104589	0	0.0111111	0	f	0.886883	m	0.58402	m	0.539225
chr1	185857055	185858595	CGI1155	110	0.77686	0.652239	1340	8.20896	1700056E22Rik,Dusp10	"NM_028516","NM_022019"	exon	0.00978819	0.010197	0.00712355	0.00658044	0.00254952	0.00781711	f	1	m	0.78159	f	0.885476
chr1	186542117	186542806	CGI1156	33	0.747507	0.607362	489	6.74847	4930488B22Rik	"NR_040627"	exon	0.00660714	0.00479167	0.00500641	0.00743467	0.006	0.00895165	m	0.839173	f	0.949825	f	0.680899
chr1	186551177	186552128	CGI1157	47	0.65452	0.620506	751	6.25832	Hlx	"NM_008250"	exon	0.0147054	0.0100629	0.00276348	0.0102618	0.00519793	0.00566449	m	0.841365	f	0.720018	f	0.876149
chr1	186555297	186557218	CGI1158	126	0.760345	0.622894	1721	7.32132	Hlx	"NM_008250"	exon	0.00500541	0.00705683	0.00450063	0.00695972	0.00482304	0.00242482	f	0.841889	f	0.728458	m	0.642306
chr1	186558354	186558725	CGI1159	9	0.639956	0.584795	171	5.26316			intergenic	0	0	0	0.00865801	0.0108788	0	-	NA	f	0.6724	m	0.354356
chr1	186616918	186617627	CGI1160	23	0.567903	0.565815	509	4.51866	Mosc1	"NM_001081361"	intron	0.161803	0.146852	0.00902184	0.0120453	0.00624084	0	m	0.896482	f	0.83379	m	0.354356
chr1	186634440	186635316	CGI1161	52	0.719038	0.656805	676	7.69231	Mosc1	"NM_001081361"	exon	0.0125603	0.0101852	0.00756247	0.00318813	0.000997009	0.00311891	m	0.433006	m	0.92241	f	0.786343
chr1	186650960	186651691	CGI1162	23	0.625917	0.538606	531	4.33145	Mosc2	"NM_133684"	intron	0.0660411	0.0482213	0.00612245	0.0135088	0.00747863	0.003367	m	1	f	0.905325	m	0.642306
chr1	186669044	186670212	CGI1163	67	0.75336	0.608471	968	6.92149	Mosc2	"NM_133684"	exon	0.00759878	0.0049744	0.00718603	0.00443918	0.000684932	0.00203221	m	0.929845	m	0.783436	f	0.800731
chr1	186675723	186676103	CGI1164	9	0.705217	0.538889	180	5			intergenic	0.0529236	0.0269935	0	0	0.0343056	0.0285714	m	0.921152	-	NA	m	0.884249
chr1	186697912	186698585	CGI1165	22	0.628498	0.545455	473	4.65116	C130074G19Rik	"NM_178692"	exon	0.159546	0.223423	0.0217097	0.0132815	0.0414908	0.0170343	f	0.644419	m	0.999251	m	0.259975
chr1	186706079	186707420	CGI1166	77	0.709976	0.617003	1141	6.74847	C130074G19Rik	"NM_178692"	exon	0.0155195	0.010875	0.00788174	0.00586671	0.00520906	0.00158228	m	1	m	0.895631	m	0.419742
chr1	186822837	186824508	CGI1167	161	0.94359	0.681849	1471	10.9449	Mark1	"NM_145515"	exon	0.0058014	0.00988806	0.00888526	0.0109813	0.00726433	0.00485857	f	0.638106	f	0.933351	m	0.651177
chr1	187016893	187017275	CGI1168	9	0.659084	0.549451	182	4.94505			intergenic	0.0843461	0.0860529	0.0237485	0.00595238	0	0.00854701	f	1	m	0.67366	f	0.642306
chr1	187027327	187028557	CGI1169	68	0.751652	0.6	1030	6.60194	Rab3gap2	"NM_001163754"	exon	0.00152207	0.00539248	0.00933305	0.00442902	0.00664024	0.00352113	f	0.794615	m	0.868501	m	0.507205
chr1	187152377	187153596	CGI1170	82	0.817948	0.628067	1019	8.04711	Iars2	"NM_198653"	exon	0.0118664	0.00818488	0.0100811	0.00536176	0.0101352	0.00778711	m	0.945922	m	0.762118	m	0.649945
chr1	187155678	187156383	CGI1171	33	0.727585	0.6	505	6.53465	Bpnt1	"NM_011794"	exon	0.0123309	0.00723871	0.00263835	0.00592108	0.00280584	0.00231481	m	0.919537	f	0.902613	m	0.814202
chr1	187186421	187187818	CGI1172	112	0.96524	0.623225	1197	9.35673	Eprs	"NM_029735"	exon	0.00377182	0.00787802	0.00400247	0.00758887	0.00656047	0.00159855	f	0.666686	f	0.93379	m	0.323287
chr1	187278492	187279733	CGI1173	83	0.724533	0.663785	1041	7.9731	Gm2061,Slc30a10	"NR_040305","NM_001033286"	exon	0.0120835	0.0103054	0.00583374	0.00418803	0.000823045	0.00704959	m	0.815375	m	0.866882	f	0.219236
chr1	187940668	187941426	CGI1174	39	0.766052	0.609319	558	6.98925	Lyplal1	"NM_146106"	exon	0	0.00978836	0.0121152	0.00421245	0.00519838	0.000915751	f	0.545199	m	0.791604	m	0.480598
chr1	188528008	188528726	CGI1175	35	0.776086	0.592664	518	6.75676	Tgfb2	"NM_009367"	exon	0.0150611	0.0126454	0.00532407	0.00612399	0.00146199	0.00694444	m	1	f	1	f	0.795598
chr1	188528851	188530137	CGI1176	82	0.784852	0.620626	1086	7.55064	Tgfb2	"NM_009367"	exon	0.00800445	0.0037037	0.00411765	0.00343548	0.00522014	0.00381526	m	0.698864	m	0.927142	m	0.480598
chr1	188572777	188573588	CGI1177	38	0.774067	0.574468	611	6.21931	Rrp15	"NM_026041"	exon	0.010268	0.0105797	0.0131757	0.00232288	0.00110865	0.00583959	f	0.798412	m	0.779453	f	0.642306
chr1	188657138	188657604	CGI1178	14	0.57026	0.646617	266	5.26316			intergenic	0.00416667	0.00617284	0.00625	0	0.0026455	0.00294118	f	1	m	0.78159	f	1
chr1	188657697	188658791	CGI1179	43	0.569516	0.581655	894	4.80984			intergenic	0.00116959	0.011156	0.0102814	0.0164021	0.0067192	0.00198413	f	0.658785	f	0.881078	m	0.513675
chr1	188682258	188682716	CGI1180	19	1.10835	0.51938	258	7.36434			intergenic	0.318311	0.361263	0.0156315	0.0347099	0.0156595	0.0433747	f	0.758293	f	0.6724	f	0.801077
chr1	188791069	188792414	CGI1181	89	0.889535	0.59738	1145	7.77293	D1Pas1	"NM_033077"	exon	0.366345	0.403051	0.0523974	0.0875076	0.0307914	0.0649202	f	0.642002	f	0.500399	f	1
chr1	189039149	189039925	CGI1182	51	0.940283	0.616319	576	8.85417	Gpatch2,Spata17	"NM_026367","NM_029067,NM_028848"	exon	0	0.00500441	0.00717733	0.00102881	0.00431092	0.00438412	f	0.433444	m	0.614115	f	1
chr1	189172192	189172639	CGI1183	10	0.513679	0.562753	247	4.04858	Gpatch2	"NM_026367"	exon	0.222281	0.125343	0.0125	0.00956938	0.327127	0.0116883	m	0.409903	m	1	m	1.2932e-05
chr1	189428521	189428933	CGI1184	13	0.868044	0.533019	212	6.13208			intergenic	0.0126984	0.00977444	0.011963	0.00912698	0.01	0	m	0.949105	m	0.922209	m	0.642306
chr1	189429176	189429591	CGI1185	19	0.906781	0.627907	215	8.83721			intergenic	0.00666667	0	0.00595238	0.0170149	0.030584	0.004	m	0.658785	f	0.673417	m	0.18463
chr1	189431005	189432219	CGI1186	49	0.573844	0.58284	1014	4.83235			intergenic	0.0119683	0.00110988	0	0.00188679	0.0130495	0.00471194	m	0.658785	f	0.78159	m	0.627776
chr1	189432447	189434172	CGI1187	102	0.754896	0.596066	1525	6.68852	Esrrg	"NM_001243792"	exon	0.0018021	0.00913447	0.00255635	0.0100403	0.00537919	0.0104334	f	0.646429	f	0.601958	f	0.480598
chr1	189475375	189476159	CGI1188	49	0.914999	0.606164	584	8.39041	Esrrg	"NM_001243792"	intron	0.00681342	0.00576545	0.0163271	0.00921593	0.00696286	0.00134953	m	0.937191	m	1	m	0.642306
chr1	189821390	189822242	CGI1189	39	0.763905	0.565951	652	5.9816	Esrrg	"NM_001243792,NM_011935"	exon	0.00454545	0.00595238	0.00152439	0.003663	0.00988456	0.0058072	f	0.900974	f	0.895631	m	0.705321
chr1	189901563	189901974	CGI1190	5	0.278368	0.587678	211	2.36967	Esrrg	"NM_011935,NM_001243792"	intron	0.248033	0.412393	0.0218931	0.0274725	0.233116	0.0166667	f	0.676842	f	0.922209	m	0.0872124
chr1	190086996	190087445	CGI1191	14	0.646721	0.594378	249	5.62249	Ush2a	"NM_021408"	exon	0.19859	0.196022	0.00364397	0.0104938	0.0313247	0.0218254	m	0.895042	f	1	m	0.582904
chr1	190537963	190538329	CGI1192	8	0.689396	0.548193	166	4.81928	Ush2a	"NM_021408"	exon	0.118896	0.225884	0.0185185	0.025563	0.139236	0.00454696	f	0.485592	f	0.78159	m	0.000681475
chr1	190830744	190831994	CGI1193	81	0.706453	0.664762	1050	7.71429	Kctd3	"NM_172650"	exon	0.00772613	0.00926454	0.00944707	0.00766268	0.00423831	0.0058299	f	0.965315	m	0.935665	f	1
chr1	191073698	191074335	CGI1194	25	0.737378	0.569794	437	5.72082	Kcnk2	"NM_001159850,NM_010607,NR_027627"	intron	0.292013	0.420576	0.113438	0.0420932	0.00421053	0.027417	f	0.515655	m	0.401495	f	0.642306
chr1	191166513	191168404	CGI1195	103	0.667402	0.604967	1691	6.09107	Kcnk2	"NM_001159850,NM_010607,NR_027627"	exon	0.00900756	0.0130213	0.0109269	0.00761796	0.0063535	0.00581395	f	0.782208	m	0.89173	m	0.493151
chr1	191383590	191384234	CGI1196	24	0.840618	0.545045	444	5.40541			intergenic	0.314021	0.158077	0.0105263	0.00915751	0.0143745	0	m	0.203492	m	0.942985	m	0.480598
chr1	191405680	191406432	CGI1197	30	0.598487	0.619565	552	5.43478			intergenic	0.120867	0.0593095	0.0114905	0.0298312	0.00390625	0.0143229	m	0.438752	f	0.612149	f	0.488045
chr1	191511454	191512481	CGI1198	61	0.767833	0.620314	827	7.37606	Cenpf	"NM_001081363"	exon	0.00529465	0.00262865	0.00715488	0.00280648	0.0185019	0.0107527	m	0.918711	m	0.906921	m	0.481056
chr1	191551169	191553024	CGI1199	128	0.72487	0.656798	1655	7.73414	Ptpn14	"NM_008976"	exon	0.0087037	0.0105917	0.00780672	0.00310245	0.00694294	0.00449765	f	0.6771	m	0.6724	m	0.90614
chr1	191610449	191611007	CGI1200	20	0.616843	0.606145	358	5.58659	Ptpn14	"NM_008976"	exon	0.121711	0.0727139	0.029391	0.0112496	0.287728	0	m	0.635295	m	0.456541	m	3.09403e-07
chr1	191622836	191623219	CGI1201	11	0.969378	0.513661	183	6.01093	Ptpn14	"NM_008976"	intron	0.173205	0.184063	0.00892857	0	0.453647	0.00549451	f	1	m	0.78159	m	0.000191019
chr1	191745373	191746859	CGI1202	99	0.793332	0.623639	1286	7.69829	Smyd2	"NM_026796"	exon	0.00746536	0.0166312	0.00432842	0.00381563	0.00594366	0.00289256	f	0.793264	m	0.78159	m	0.885558
chr1	191984942	191985417	CGI1203	12	0.531628	0.578182	275	4.36364	Prox1	"NM_008937"	exon	0.216152	0.276513	0.00937993	0.0198092	0.0026455	0	f	0.43652	f	0.919539	m	0.642306
chr1	191992585	191993548	CGI1204	44	0.590429	0.639581	763	5.76671	Prox1	"NM_008937"	intron	0.0104575	0.0101162	0.00946825	0.0140443	0.0234353	0.00163399	m	0.753181	f	1	m	0.0620426
chr1	191993800	191995035	CGI1205	77	0.798711	0.613527	1035	7.43961	Prox1	"NM_008937"	exon	0.00910043	0.015466	0.00858542	0.00124533	0.00449295	0.00311677	f	0.940457	m	0.6724	m	0.921843
chr1	191996243	191997171	CGI1206	40	0.727637	0.554945	728	5.49451			intergenic	0.00928117	0.0038914	0.00581818	0.00681156	0.00675446	0.00420513	m	0.658785	f	0.914903	m	0.763895
chr1	191998259	191999703	CGI1207	71	0.601401	0.616559	1244	5.7074			intergenic	0.00507937	0.00674074	0.00780995	0.00557822	0.00677884	0.00391236	f	0.871392	m	0.939762	m	0.346286
chr1	192306925	192307363	CGI1208	10	0.520933	0.571429	238	4.20168			intergenic	0.18419	0.117866	0	0.0239205	0.00238095	0.00280112	m	0.545199	f	0.500399	f	1
chr1	192505884	192506405	CGI1209	17	0.591406	0.601246	321	5.29595			intergenic	0.167322	0.122797	0	0.0380563	0.104755	0.00793651	m	0.741806	f	0.0406917	m	0.00188604
chr1	192514320	192514904	CGI1210	22	0.615378	0.611979	384	5.72917			intergenic	0.0743582	0.110919	0.00462963	0.0037037	0.02501	0	f	0.740739	m	1	m	0.0234236
chr1	192735222	192736195	CGI1211	51	0.705966	0.615783	773	6.59767	Rps6kc1	"NM_178775"	exon	0.00230681	0.00339973	0.00623075	0.00826822	0.00650079	0.0105769	f	0.794615	f	0.935714	f	0.642306
chr1	192751955	192753212	CGI1212	103	0.943989	0.645222	1057	9.74456	Angel2	"NM_001199020,NR_037578,NR_037579,NM_021421"	exon	0.00892992	0.00490152	0.0114873	0.00691912	0.00502143	0.00340136	m	0.902406	m	0.6724	m	0.551464
chr1	192772842	192773315	CGI1213	15	0.65239	0.582418	273	5.49451	Vash2	"NR_027352,NM_144879"	exon	0.12144	0.190676	0.0182585	0.0139559	0.325086	0.0031746	f	0.5371	m	0.879393	m	1.70555e-06
chr1	192801806	192803587	CGI1214	121	0.709191	0.657812	1581	7.65338	Vash2	"NR_027352,NM_144879"	exon	0.00616253	0.0118114	0.00626734	0.00244515	0.00979472	0.00417449	f	0.794615	m	0.78527	m	0.480598
chr1	192848903	192850661	CGI1215	115	0.720605	0.641207	1558	7.38126	A230020J21Rik,Mfsd7b	"NR_027298","NM_001081259"	exon	0.00983404	0.0105061	0.00399045	0.00734522	0.00262264	0.00333633	f	1	f	0.951528	f	1
chr1	192886378	192887492	CGI1216	68	0.837045	0.597374	914	7.43982	Nsl1,Tatdn3	"NM_198654","NM_001163422,NM_001163421,NM_026895"	exon	0.00391832	0.00474267	0.00535155	0.00284399	0.00344726	0.00108342	f	0.950953	m	0.821276	m	0.800545
chr1	192921478	192922879	CGI1217	107	0.751207	0.690258	1201	8.90924	Batf3	"NM_030060"	exon	0.00162022	0.00812875	0.00940594	0.0100123	0.00540947	0.00420051	f	0.499696	f	0.888261	m	0.642306
chr1	192949611	192950239	CGI1218	30	0.652045	0.656542	428	7.00935			intergenic	0.0313533	0.0293576	0.0084909	0.00294118	0.00782086	0.00477941	m	0.851397	m	0.685212	m	0.844402
chr1	193006138	193009733	CGI1219	219	0.739293	0.590869	3395	6.45066	Atf3	"NM_007498"	exon	0.00906835	0.00612362	0.00497227	0.00509928	0.00619928	0.00347222	m	0.794615	f	0.97466	m	0.0433248
chr1	193047622	193049000	CGI1220	69	0.652604	0.602716	1178	5.85739			intergenic	0.0323915	0.0457219	0.00309043	0.00843662	0.00748332	0.00926288	f	0.908652	f	0.839546	f	0.675994
chr1	193141128	193142232	CGI1221	61	0.672052	0.634956	904	6.74779	Nenf	"NM_025424"	exon	0.0285614	0.0194012	0.00990247	0.00650138	0.00718655	0.00934744	m	1	m	0.78159	f	0.907838
chr1	193149464	193150657	CGI1222	73	0.708517	0.645519	993	7.35146	Tmem206	"NM_025864"	exon	0.0206016	0.0119969	0.00552608	0.00614896	0.00783915	0.00474104	m	0.846089	f	0.912196	m	0.645867
chr1	193219693	193221895	CGI1223	208	0.921931	0.674326	2002	10.3896	Ppp2r5a	"NM_144880"	exon	0.00952131	0.00567704	0.00758512	0.00661267	0.00583633	0.00232975	m	0.903753	m	0.890774	m	0.361216
chr1	193398617	193400284	CGI1224	126	0.934395	0.608044	1467	8.58896	Dtl,Ints7	"NM_029766","NM_178632"	exon	0.00822196	0.00335229	0.00517854	0.0098727	0.00275496	0.00874842	m	0.55207	f	0.782519	f	0.480598
chr1	193541483	193543513	CGI1225	211	0.912471	0.711475	1830	11.5301	Lpgat1	"NM_172266,NM_001134829"	exon	0.0102007	0.0084052	0.00986935	0.010883	0.00685004	0.0105664	m	0.649673	f	1	f	0.87726
chr1	193644767	193646204	CGI1226	92	0.822949	0.603072	1237	7.43735	Nek2	"NM_010892"	exon	0.0118554	0.0122679	0.00959857	0.0044527	0.00697348	0.00166667	f	0.794615	m	0.6724	m	0.231287
chr1	193658631	193659103	CGI1227	13	0.575957	0.577206	272	4.77941			intergenic	0.0105971	0.0577475	0.0191132	0.003663	0.0306122	0.00713012	f	0.533538	m	0.6724	m	0.803947
chr1	193729737	193731900	CGI1228	209	0.885592	0.693836	1963	10.647	1700034H15Rik,Slc30a1	"NR_030669","NM_009579"	exon	0.00801357	0.0069353	0.00605311	0.00606618	0.00480195	0.00300099	m	0.820237	f	0.925645	m	0.544191
chr1	193808958	193809567	CGI1229	29	0.673124	0.650367	409	7.09046	Rd3	"NM_001177900,NM_023727"	exon	0.0568083	0.0761044	0.0294648	0.00686966	0	0	f	0.847669	m	0.532027	-	NA
chr1	193813639	193814276	CGI1230	22	0.650953	0.558352	437	5.03432			intergenic	0.00255102	0.00803571	0.00297619	0.0160542	0	0.0141736	f	0.892086	f	0.6724	f	0.179314
chr1	193915665	193916773	CGI1231	62	0.72814	0.614537	908	6.82819	Traf5	"NM_011633"	exon	0.0145741	0.0100256	0.00718599	0.00916459	0.0020979	0.014881	m	0.747747	f	0.814095	f	0.533349
chr1	193960246	193962894	CGI1232	208	0.746087	0.677288	2448	8.49673	Gm10516,Rcor3	"NR_033536","NM_144814"	exon	0.0109104	0.00612886	0.00913725	0.0147569	0.00687076	0.0110881	m	0.845397	f	0.6724	f	0.963496
chr1	194014146	194015593	CGI1233	86	0.698405	0.629511	1247	6.89655	Kcnh1	"NM_010600,NM_001038607"	exon	0.0104329	0.00465725	0.00401884	0.0076061	0.00983853	0.00788904	m	0.543461	f	0.875784	m	0.892165
chr1	194596572	194597660	CGI1234	72	0.783433	0.64527	888	8.10811	Hhat	"NM_144881"	exon	0.00401007	0.00171904	0.00805116	0.00515329	0.0140969	0.00416667	m	0.818282	m	0.927142	m	0.227539
chr1	194659576	194660510	CGI1235	35	0.556711	0.585831	734	4.76839			intergenic	0.0214039	0.0153528	0.00449735	0.0021645	0.00170068	0.0018315	m	0.714495	m	0.895631	f	1
chr1	194660467	194661459	CGI1236	59	0.700175	0.652778	792	7.44949			intergenic	0.00579305	0.00270062	0.00697007	0.00945783	0.0071158	0	m	0.82295	f	1	m	0.19422
chr1	194661550	194661987	CGI1237	12	0.589484	0.599156	237	5.06329			intergenic	0.0472527	0.0193233	0.0171795	0	0.0104094	0	m	0.798412	m	0.58402	m	0.423322
chr1	194680639	194682466	CGI1238	166	0.887602	0.680393	1627	10.2028	Sertad4	"NM_198247"	exon	0.00850229	0.00675806	0.0118442	0.00640493	0.0107953	0.00215227	m	0.888775	m	0.741996	m	0.262823
chr1	194861002	194862622	CGI1239	89	0.677018	0.616901	1420	6.26761	Syt14	"NM_181546"	exon	0.0123671	0.0214183	0.0065962	0.000632511	0.00402047	0.00290267	f	0.795906	m	0.526411	m	0.817487
chr1	194955827	194956747	CGI1240	62	0.917531	0.613889	720	8.61111	Diexf	"NM_145415"	exon	0.00395334	0.00502372	0.0101426	0.004597	0.00163795	0.00330181	f	0.794615	m	0.58402	f	0.835148
chr1	194978907	194979813	CGI1241	47	0.604869	0.665722	706	6.65722	Irf6	"NM_016851"	exon	0.0181705	0.00479185	0.00606261	0.0130239	0.00590814	0	m	0.461663	f	0.78159	m	0.354356
chr1	194999307	195000287	CGI1242	45	0.74304	0.558974	780	5.76923	A130010J15Rik	"NM_001160360,NM_001160359,NM_181048"	exon	0.0101054	0.0024093	0.00592845	0.0108433	0.0091842	0.0097061	m	0.726734	f	0.872628	f	0.86193
chr1	195098561	195099045	CGI1243	17	0.557801	0.658451	284	5.98592	G0s2	"NM_008059"	exon	0.00501253	0.0119298	0.00666667	0.00679825	0.00263158	0.00294118	f	0.901205	f	1	f	1
chr1	195156149	195156564	CGI1244	10	0.494516	0.623256	215	4.65116	Lamb3	"NM_008484"	exon	0.132768	0.180963	0.011544	0	0.278064	0	f	0.835774	m	0.6724	m	0.00264915
chr1	195458810	195459190	CGI1245	17	1.00166	0.622222	180	9.44444			intergenic	0.115131	0.112623	0.00173913	0.0108696	0.0146322	0.00289855	m	0.958817	f	1	m	0.369711
chr1	196445559	196447274	CGI1246	116	0.734693	0.649505	1515	7.65677	Plxna2	"NM_008882"	exon	0.00463938	0.00534206	0.0101662	0.000763942	0.00485667	0.00518101	f	0.901227	m	0.0421533	f	0.90536
chr1	196705608	196705966	CGI1247	8	0.644403	0.563291	158	5.06329			intergenic	0.0417874	0.0183983	0.0391813	0.0233333	0.0203175	0.00793651	m	0.925524	m	0.926538	m	0.544191
chr1	196764873	196765501	CGI1248	28	0.598121	0.663551	428	6.54206	Cd34	"NM_133654,NM_001111059"	exon	0.00929293	0.0195997	0.00185185	0.00936819	0.0108081	0.0148148	f	0.93348	f	0.78159	f	0.868372
chr1	196802145	196803369	CGI1249	85	0.816994	0.642578	1024	8.30078	Gm16897	"NR_033564"	exon	0.00458439	0.00853165	0.00749527	0.0117638	0.00514774	0.00234907	f	0.887082	f	0.78159	m	0.608152
chr1	196918188	196918766	CGI1250	16	0.547791	0.563492	378	4.2328	Cd46	"NM_010778"	exon	0	0	0	0.0172065	0.00638545	0.00877193	-	NA	f	0.58402	f	0.826463
chr1	196956988	196957664	CGI1251	25	0.663166	0.573529	476	5.2521	Cr1l	"NM_013499"	exon	0	0.0102525	0	0.00436508	0.00344828	0	f	0.545199	f	0.6724	m	0.642306
chr1	197067541	197068254	CGI1252	33	0.813997	0.563353	513	6.43275			intergenic	0.0386998	0.0489334	0.0220001	0.0266923	0.0296934	0.037547	f	0.900657	f	0.922209	f	0.882391
chr10	3133884	3135737	CGI1253	121	0.743678	0.629764	1653	7.32002	Cnksr3	"NM_172546"	exon	0.00891525	0.00479423	0.00332497	0.00277089	0.00617055	0.00330357	m	0.424942	m	0.735183	m	0.557621
chr10	3139009	3139373	CGI1254	10	0.638322	0.621951	164	6.09756	Cnksr3	"NM_172546"	intron	0.0865623	0.198744	0.00885628	0.0084707	0.112091	0	f	0.237177	m	1	m	0.00416477
chr10	3557330	3558069	CGI1255	23	0.486107	0.595547	539	4.26716	Oprm1	"NM_001039652"	exon	0.00734266	0.0118333	0.00295858	0.00805391	0.00167224	0	f	0.918711	f	0.895631	m	0.642306
chr10	4310307	4310807	CGI1256	13	0.673501	0.51	300	4.33333			intergenic	0.0822055	0.0185185	0.00788066	0	0.0238095	0.00793651	m	0.795257	m	0.6724	m	1
chr10	4423635	4425266	CGI1257	91	0.684988	0.610762	1431	6.35919	Rgs17	"NM_001161822,NM_019958"	exon	0.00414079	0.00615842	0.0152244	0.007986	0.0117179	0.00422078	f	0.924007	m	0.784491	m	0.321413
chr10	4521948	4523297	CGI1258	81	0.694486	0.640557	1149	7.04961	Mtrf1l	"NM_175374"	exon	0.00601915	0.00346677	0.00600173	0.00493979	0.0139735	0	m	0.875872	m	1	m	0.086299
chr10	4540211	4541968	CGI1259	112	0.704011	0.639692	1557	7.19332	Fbxo5	"NM_025995"	exon	0.0203124	0.0134947	0.00748878	0.00732395	0.00448757	0.00740373	m	0.908317	m	0.936879	f	0.866826
chr10	4795477	4796529	CGI1260	46	0.573656	0.619718	852	5.39906	Syne1	"NM_153399"	exon	0.00212766	0.00342167	0.00818765	0.00543478	0.00425532	0.00355962	f	1	m	0.913033	m	0.806753
chr10	5151591	5152195	CGI1261	21	0.585747	0.596535	404	5.19802	Syne1	"NM_001079686"	exon	0.00690537	0.0170716	0.00569358	0	0.00838509	0.00645007	f	0.80066	m	0.6724	m	1
chr10	5633357	5634611	CGI1262	73	0.692856	0.633776	1054	6.926	Esr1	"NM_007956"	exon	0.00774162	0.00995358	0.00642866	0.00540844	0.00871055	0.004329	f	0.89584	m	0.924619	m	0.170343
chr10	5636135	5636642	CGI1263	13	0.536879	0.583062	307	4.23453	Esr1	"NM_007956"	intron	0.00833333	0.0140931	0.00694444	0	0.00706845	0.0037037	f	0.795906	m	0.787474	m	0.826463
chr10	5913194	5914701	CGI1264	95	0.895568	0.570008	1307	7.26855	1700052N19Rik,Rmnd1	"NM_024261","NM_025343"	exon	0.00713327	0.0122332	0.0116798	0.00315904	0.00521215	0.00150645	f	0.891468	m	0.431774	m	0.589799
chr10	5957620	5960103	CGI1265	261	0.903698	0.711783	2283	11.4323	Zbtb2	"NM_001033466"	exon	0.00411378	0.00607476	0.0068988	0.00778137	0.00201474	0.00441243	f	0.987579	f	0.92472	f	0.6736
chr10	5999393	5999860	CGI1266	22	0.716239	0.681648	267	8.2397	Akap12	"NM_031185"	intron	0.00444444	0.00213675	0.00931373	0	0.00307692	0	m	1	m	0.58402	m	0.642306
chr10	6079299	6080339	CGI1267	54	0.65164	0.628571	840	6.42857	Akap12	"NM_031185"	exon	0.0049435	0.0014881	0.00827684	0.00785303	0.00968441	0.00696309	m	0.900694	m	1	m	0.929254
chr10	6080612	6081064	CGI1268	14	0.707703	0.563492	252	5.55556			intergenic	0.00809717	0.0230595	0.0145749	0	0.0116959	0	f	0.894313	m	0.6724	m	0.642306
chr10	6372364	6373724	CGI1269	79	0.662906	0.641379	1160	6.81034	Mthfd1l	"NM_001170785,NM_172308,NM_001170786"	exon	0.00479664	0.00776014	0.00686531	0.0129868	0.00137174	0.00192052	f	0.944793	f	0.606101	f	0.642306
chr10	6605375	6606425	CGI1270	70	0.716589	0.683529	850	8.23529	Plekhg1	"NM_001159942"	exon	0.0119645	0.00438285	0.00590796	0.00521645	0.00789459	0.00284939	m	0.676611	m	0.934114	m	0.480598
chr10	6979025	6980553	CGI1271	99	0.734214	0.638554	1328	7.45482	Ppp1r14c	"NM_133485"	exon	0.00605111	0.00694192	0.00731859	0.00415887	0.00433644	0.00563946	f	0.976444	m	0.826463	f	0.85124
chr10	7309096	7310774	CGI1272	142	0.906477	0.651556	1478	9.60758	Lrp11	"NM_172784"	exon	0.00437235	0.006802	0.00924148	0.00893374	0.00803892	0.00645249	f	0.691182	m	1	m	0.732533
chr10	7382330	7383698	CGI1273	103	0.814365	0.660103	1168	8.81849	A630066F11Rik,Pcmt1	"NR_030698","NM_008786"	exon	0.0137486	0.01028	0.00420883	0.0115069	0.00657301	0.0024323	m	0.822957	f	0.651139	m	0.642306
chr10	7387092	7387756	CGI1274	24	0.603899	0.586207	464	5.17241	Nup43	"NM_145706"	exon	0.0105655	0.00625137	0.00828536	0.00815058	0.003125	0.00183824	m	1	m	1	m	1
chr10	7400229	7401837	CGI1275	136	0.856639	0.671875	1408	9.65909	BC020402,Lats1	"NR_033219","NM_010690"	exon	0.0112711	0.0103228	0.00347462	0.00835728	0.00430544	0.00289258	m	0.883547	f	0.673417	m	0.784044
chr10	7445508	7446312	CGI1276	44	0.86485	0.581126	604	7.28477	Katna1	"NM_011835"	exon	0.00631624	0.00153846	0.00886905	0	0.00333333	0.00125	m	0.664005	m	0.420816	m	0.798421
chr10	7499936	7500967	CGI1277	74	0.80242	0.666667	831	8.90493	Ginm1	"NM_145418"	exon	0.00826634	0.0128858	0.00874043	0.00602073	0.00625	0	f	1	m	0.88228	m	0.299959
chr10	7512217	7513347	CGI1278	61	0.833936	0.566667	930	6.55914	Ppil4	"NM_026141"	exon	0.0100919	0.00807044	0.00590256	0.00641042	0.0035298	0.00563017	m	0.772631	f	0.927131	f	1
chr10	7581985	7582550	CGI1279	19	0.660592	0.569863	365	5.20548	Zc3h12d	"NM_172785"	exon	0.450036	0.468688	0.0117178	0.0478965	0.0388883	0.0310829	f	0.942584	f	0.529328	m	0.93526
chr10	7586817	7588066	CGI1280	68	0.647232	0.633937	1049	6.48236	Zc3h12d	"NM_172785"	exon	0.0397433	0.0385849	0.00788536	0.0107805	0.00327245	0.00834964	m	1	f	1	f	0.726619
chr10	7674885	7676899	CGI1281	215	0.867635	0.739802	1814	11.8523	Tab2	"NM_138667"	exon	0.0137301	0.0117173	0.0103363	0.0109217	0.0065981	0.00683798	m	1	f	0.78159	f	0.95153
chr10	7855371	7855812	CGI1282	13	0.780271	0.53112	241	5.39419			intergenic	0.0895833	0.192063	0.0290638	0	0.0410741	0.00480769	f	0.427279	m	0.393882	m	0.213088
chr10	7927095	7927480	CGI1283	14	1.08639	0.52973	185	7.56757	Ust	"NM_177387"	exon	0.237712	0.401553	0.0497703	0.0248265	0	0.00457666	f	0.443592	m	0.6724	f	0.642306
chr10	7933726	7934176	CGI1284	12	0.664032	0.54	250	4.8	Ust	"NM_177387"	intron	0.145759	0.104253	0.0296296	0.0037037	0.219327	0	m	0.758293	m	0.89173	m	5.90494e-05
chr10	8237239	8239099	CGI1285	117	0.677199	0.645783	1660	7.04819	Ust	"NM_177387"	exon	0.0104025	0.00705363	0.00706654	0.00498013	0.00378162	0.00235988	m	0.658785	m	0.800429	m	0.727899
chr10	8605327	8606664	CGI1286	93	0.826441	0.630607	1137	8.17942	Sash1	"NM_175155"	exon	0.00873562	0.00447824	0.00685544	0.0111536	0.00373423	0.00507519	m	0.745396	f	1	f	1
chr10	9394065	9396046	CGI1287	132	0.740835	0.632791	1781	7.41157	Samd5	"NM_177271"	exon	0.0117212	0.008943	0.00521412	0.00853012	0.00988199	0.00281084	m	0.947845	f	0.919107	m	0.376432
chr10	9403484	9403899	CGI1288	11	0.698839	0.548837	215	5.11628			intergenic	0.231422	0.232086	0.0136185	0.00648148	0.031757	0.00444444	f	1	m	0.895631	m	0.103145
chr10	9517662	9518092	CGI1289	13	0.871715	0.513043	230	5.65217	Stxbp5	"NM_001081344"	exon	0.271605	0.240581	0.00873016	0.023545	0.00547175	0.0127551	m	0.88508	f	0.895631	f	0.814202
chr10	9619992	9621581	CGI1290	133	0.848444	0.672426	1389	9.57523	Stxbp5	"NM_001081344"	exon	0.00607172	0.00892547	0.00980665	0.00491098	0.00592885	0.0025641	f	0.84282	m	0.602205	m	0.376921
chr10	10277369	10278243	CGI1291	49	0.747966	0.624629	674	7.27003	Rab32	"NM_026405"	exon	0.0113075	0.0137215	0.010809	0.0119864	0.00552885	0	f	1	f	0.944639	m	0.354356
chr10	10408716	10409580	CGI1292	34	0.517168	0.638554	664	5.12048	Grm1	"NM_016976,NM_001114333"	exon	0.00814536	0.00263158	0.0109962	0.00198413	0.00931495	0.00195312	m	0.794615	m	0.625583	m	0.657617
chr10	10656032	10656472	CGI1293	15	0.775598	0.575	240	6.25	Grm1	"NM_016976,NM_001114333"	exon	0.250673	0.203363	0.0253259	0.0167287	0.0228593	0.00859356	m	0.794615	m	0.800176	m	0.579278
chr10	10799926	10800752	CGI1294	37	0.726924	0.573482	626	5.91054	Grm1	"NM_016976,NM_001114333"	exon	0.010239	0.0164839	0.01499	0.00947851	0.00764427	0.00767196	f	1	m	0.843781	f	0.862845
chr10	10801275	10801852	CGI1295	17	0.644215	0.551724	377	4.50928	Grm1	"NM_016976,NM_001114333"	intron	0.00277778	0	0.00699301	0	0.00892857	0	m	0.794327	m	0.863745	m	0.579857
chr10	10868862	10869982	CGI1296	75	0.765358	0.655435	920	8.15217	Shprh	"NM_172937,NM_001077707"	exon	0.002035	0.00468892	0.0136534	0.00885781	0.00309215	0.00838279	f	0.658785	m	0.625058	f	0.642306
chr10	11000231	11002021	CGI1297	165	0.870114	0.693711	1590	10.3774	Fbxo30	"NM_027968,NM_001168297"	exon	0.00737774	0.0136996	0.00447421	0.00752013	0.00369806	0.00164856	f	0.657808	f	0.996977	m	0.809624
chr10	11062803	11063944	CGI1298	103	0.917123	0.691817	941	10.9458	Epm2a	"NM_010146"	exon	0.0141501	0.0115775	0.00724264	0.0107634	0.011649	0.00922394	m	0.658939	f	0.973841	m	1
chr10	11211672	11212087	CGI1299	22	0.742516	0.744186	215	10.2326			intergenic	0.627802	0.630578	0.429241	0.441306	0.590367	0.563118	f	1	f	1	m	0.919337
chr10	12587212	12587627	CGI1300	11	0.546847	0.623256	215	5.11628			intergenic	0.00512821	0	0.00888889	0	0.015052	0.00892857	m	0.794615	m	0.78159	m	0.678945
chr10	12587796	12589641	CGI1301	124	0.733886	0.643769	1645	7.53799			intergenic	0.00757919	0.00590055	0.00457956	0.0109996	0.00739132	0.00744888	m	0.954567	f	0.90048	f	0.861193
chr10	12642111	12643183	CGI1302	61	0.808666	0.58945	872	6.99541	B230208H11Rik	"NR_038028,NR_038027"	exon	0.00623321	0.00676678	0.00584793	0.00952686	0.00308608	0.00816761	f	1	f	0.919163	f	0.8362
chr10	12660753	12661860	CGI1303	70	0.856443	0.600882	907	7.71775	Stx11	"NM_029075,NM_001163591,NM_001163590"	exon	0.0137948	0.0296748	0.00628314	0.00701134	0.0035895	0.00277278	f	0.488124	f	0.908959	m	0.875533
chr10	12683642	12684756	CGI1304	70	0.722424	0.652079	914	7.65864	Stx11	"NM_029075,NM_001163591,NM_001163590"	exon	0.0079354	0.00925685	0.0129918	0.0028169	0.00284016	0.00924001	f	0.889699	m	0.468112	f	0.623068
chr10	12715305	12715769	CGI1305	12	0.656356	0.55303	264	4.54545			intergenic	0.195707	0.235521	0.00568182	0.00534759	0.0357301	0.00581315	f	0.817049	m	1	m	0.268324
chr10	12727973	12729043	CGI1306	73	0.938801	0.598851	870	8.3908	Sf3b5	"NM_175102"	exon	0.00793038	0.00301891	0.00672515	0.00876123	0.00375018	0.00643605	m	0.545199	f	0.630133	f	0.746257
chr10	12780439	12781247	CGI1307	43	0.712302	0.631579	608	7.07237			intergenic	0.00920746	0.00914531	0.011516	0.00401875	0.00541214	0.00510204	m	0.891222	m	0.913005	m	0.835563
chr10	12810051	12811257	CGI1308	78	0.784347	0.629225	1006	7.75348	Plagl1	"NM_009538"	exon	0.303404	0.344976	0.0180239	0.00495315	0.0154853	0.00290043	f	0.481947	m	0.151547	m	0.0553425
chr10	12846908	12847428	CGI1309	16	0.577084	0.590625	320	5	Plagl1	"NM_009538"	exon	0.180211	0.19155	0.0235979	0.00404858	0.0307799	0.00292398	f	0.905975	m	0.597819	m	0.099544
chr10	12912426	12913238	CGI1310	44	0.710165	0.638889	612	7.18954	Ltv1	"NM_181470"	exon	0.00591356	0.0126753	0.00167224	0.00732496	0.00554896	0.00439174	f	0.791807	f	0.673417	m	0.717705
chr10	13043533	13044405	CGI1311	65	0.810334	0.691964	672	9.67262	Phactr2	"NM_001195066,NM_001195096,NM_001195065,NM_001033257"	exon	0.0103095	0.00828854	0.00137741	0.00274353	0.0066887	0.00471045	m	1	f	0.78159	m	0.674994
chr10	13139964	13140437	CGI1312	14	0.80185	0.527473	273	5.12821	Phactr2	"NM_001195065"	intron	0.511781	0.323986	0.0292088	0.0522559	0.0497896	0.0694444	m	0.0983889	f	0.92241	f	0.42167
chr10	13193178	13194679	CGI1313	92	0.681273	0.645657	1301	7.07148	Phactr2	"NM_001195065"	exon	0.0121192	0.00116959	0.00347862	0.00837976	0.00555556	0.00263158	m	0.119933	f	0.78032	m	0.480598
chr10	13220728	13221425	CGI1314	30	0.626208	0.62173	497	6.03622	Fuca2	"NM_025799"	exon	0.00499109	0	0.00213675	0.00444444	0.00387931	0.00185185	m	0.658785	f	1	m	0.797797
chr10	13272557	13273391	CGI1315	48	0.842456	0.600946	634	7.57098	Adat2,Pex3	"NM_025748","NM_001164195,NM_019961"	exon	0.00774199	0.0151765	0.00541916	0.00574371	0.00285948	0.00663423	f	0.68795	f	0.894742	f	1
chr10	13459704	13460079	CGI1316	8	0.483035	0.617143	175	4.57143	Aig1	"NM_025446"	intron	0.172619	0.173978	0.00757576	0.0151515	0.311192	0.00769231	f	1	f	0.896334	m	0.00196849
chr10	13587942	13589131	CGI1317	79	0.76389	0.647118	989	7.98787	Aig1	"NM_025446"	exon	0.0143458	0.0194742	0.0083189	0.00334514	0.00561995	0.00930919	f	0.949349	m	0.75347	f	0.752097
chr10	13684249	13688112	CGI1318	286	0.75034	0.645919	3663	7.80781	Hivep2	"NM_010437"	exon	0.0124262	0.00762745	0.00980209	0.00908334	0.00699645	0.00522053	m	0.809961	m	0.895631	m	0.555108
chr10	13702461	13703079	CGI1319	27	0.600672	0.657895	418	6.45933	Hivep2	"NM_010437"	intron	0.0219584	0.0084127	0.0117216	0.00680272	0.00961657	0.00735931	m	0.68997	m	1	m	0.715505
chr10	14264441	14265610	CGI1320	89	0.831969	0.665635	969	9.18473	Gpr126	"NM_001002268"	exon	0.00824522	0.00611735	0.00445007	0.00393258	0.00902683	0.00373869	m	0.806248	m	0.875676	m	0.441831
chr10	14424844	14425598	CGI1321	45	0.830565	0.629964	554	8.12274	1700016L04Rik,Vta1	"NR_045824","NM_025418"	exon	0.00255102	0.0105052	0.00528043	0.01518	0.0036859	0.00412286	f	0.57167	f	0.612527	f	1
chr10	14479796	14480502	CGI1322	27	0.659078	0.571146	506	5.33597	Nmbr	"NM_008703"	exon	0.0113661	0.00839161	0	0.00397727	0.0057598	0	m	0.838148	f	0.6724	m	0.290337
chr10	17353751	17354182	CGI1323	10	0.633892	0.52381	231	4.329			intergenic	0.15555	0.365101	0.0245526	0	0.00833333	0	f	0.0126842	m	0.386699	m	0.642954
chr10	17441729	17444699	CGI1324	192	0.725013	0.618773	2770	6.93141	Cited2	"NM_010828"	exon	0.00949377	0.00500088	0.0105072	0.00632964	0.0087827	0.00360779	m	0.54973	m	1	m	0.455511
chr10	17666796	17668495	CGI1325	173	0.968826	0.691795	1499	11.541	Heca	"NM_001033432"	exon	0.0137843	0.0115927	0.0089912	0.0104268	0.00925012	0.00888304	m	0.757948	f	0.781801	m	0.956516
chr10	17742014	17743317	CGI1326	61	0.614509	0.608341	1103	5.53037	3110003A17Rik	"NM_028440"	exon	0.00575615	0.0110535	0.0134407	0.00539475	0.0114959	0.0111784	f	0.721874	m	0.78159	m	0.970219
chr10	17774704	17776380	CGI1327	156	0.939062	0.671409	1476	10.5691	Reps1	"NM_009048,NM_001111065"	exon	0.00816704	0.0123527	0.00633312	0.0072527	0.00588796	0.00070922	f	0.83879	f	0.936879	m	0.0860469
chr10	17933440	17934128	CGI1328	26	0.722061	0.545082	488	5.32787	Ccdc28a	"NM_144820"	exon	0.235247	0.255588	0.00673401	0.00667211	0.0233737	0.003367	f	0.854207	m	0.902613	m	0.188385
chr10	17954481	17955463	CGI1329	39	0.631048	0.56266	782	4.98721	Ccdc28a	"NM_144820"	exon	0.00465608	0.00923521	0.0136142	0.00233918	0	0.00464883	f	0.91343	m	0.606438	f	0.354356
chr10	18037874	18039638	CGI1330	158	0.823937	0.700767	1564	10.1023			intergenic	0.0053905	0.00902024	0.00827294	0.00278029	0.0047583	0.00261194	f	0.68997	m	0.392465	m	0.642306
chr10	18150630	18151139	CGI1331	16	0.582576	0.598706	309	5.17799	Nhsl1	"NM_173390"	intron	0.00328947	0.0130326	0.00584795	0	0.0550566	0	f	0.898371	m	0.78159	m	0.00850513
chr10	18182808	18183206	CGI1332	10	0.717912	0.545455	198	5.05051	Nhsl1	"NM_173390"	intron	0.0989621	0.110436	0.0387252	0	0.0254745	0.0128205	f	0.949999	m	0.500399	m	1
chr10	18246083	18246798	CGI1333	22	0.487421	0.596117	515	4.27184	Nhsl1	"NM_173390,NM_001163592"	exon	0.231025	0.147882	0.00602176	0.0228481	0.0589405	0.00773185	m	0.397543	f	0.6724	m	0.0504925
chr10	18251016	18251864	CGI1334	31	0.518626	0.608025	648	4.78395	Nhsl1	"NM_173390,NM_001163592"	exon	0.0407461	0.15545	0.00112233	0.002331	0.00692774	0.00208333	f	0.0015356	f	1	m	0.642306
chr10	18265438	18266039	CGI1335	21	0.508803	0.643392	401	5.23691	Hebp2	"NM_019487"	exon	0.021656	0.00512821	0.00666667	0.0117108	0.00344828	0.00891846	m	0.727301	f	0.67366	f	0.504815
chr10	18463165	18463924	CGI1336	42	0.674237	0.670841	559	7.51342	D10Bwg1379e	"NM_001033258"	exon	0.00608103	0.0104993	0.00911269	0.0014881	0.00647458	0.00747378	f	1	m	0.605131	f	1
chr10	18564219	18565453	CGI1337	70	0.686854	0.628627	1034	6.76983	Perp	"NM_022032"	exon	0.00975721	0.0115397	0.00679001	0.0113844	0.00291096	0.00696912	f	1	f	0.6724	f	0.731991
chr10	18734478	18735590	CGI1338	68	0.790397	0.615132	912	7.45614	Tnfaip3	"NM_009397"	exon	0.00910906	0.0183956	0.00482804	0.00411353	0.00803672	0.00747784	f	0.893004	m	0.936657	m	0.831173
chr10	18981645	18982049	CGI1339	12	0.750934	0.563725	204	5.88235			intergenic	0.30691	0.328559	0.0137255	0.0261797	0.0137363	0.026738	f	0.890004	f	0.6724	f	0.850385
chr10	19072658	19073236	CGI1340	15	0.516634	0.568783	378	3.96825			intergenic	0.0204762	0.00526316	0.00727273	0.00854828	0	0	m	0.791807	f	0.925809	-	NA
chr10	19076385	19077616	CGI1341	66	0.641985	0.633366	1031	6.40155	Olig3	"NM_053008"	exon	0.00559701	0.00589226	0.00831129	0.00496032	0.00411419	0.00657242	f	0.976662	m	0.6724	f	0.979839
chr10	19311363	19312316	CGI1342	52	0.684977	0.640106	753	6.90571	Ifngr1	"NM_010511"	exon	0.00779897	0.00592295	0.00462466	0.0081499	0.000615764	0.00995671	m	0.937266	f	0.880787	f	0.640654
chr10	19432211	19432708	CGI1343	25	0.69627	0.69697	297	8.41751	Il20ra	"NM_172786"	exon	0.00929487	0.0103704	0.0055	0	0.00566449	0.00555556	f	1	m	0.6724	m	0.881046
chr10	19568661	19571882	CGI1344	200	0.651473	0.638861	3021	6.62032	Slc35d3	"NM_029529"	exon	0.00521856	0.0066598	0.00910563	0.0111089	0.00630429	0.00678317	f	0.941447	f	0.976405	f	0.74828
chr10	19626734	19627677	CGI1345	62	0.957809	0.590848	743	8.34455	Pex7	"NM_008822,NM_001161825"	exon	0.0118886	0.0123083	0.0122106	0.0101453	0.00905213	0.00208333	f	0.784638	m	1	m	0.25758
chr10	19653209	19655233	CGI1346	194	0.907756	0.688596	1824	10.636	Map3k5	"NM_008580"	exon	0.0066278	0.00622144	0.00283129	0.0090359	0.00215589	0.00603261	m	0.835356	f	0.725013	f	0.625253
chr10	19868002	19869738	CGI1347	181	0.999792	0.6875	1536	11.7839	Mtap7	"NM_001198635,NM_008635"	exon	0.00334901	0.0100839	0.00642383	0.0107418	0.00552377	0.00875138	f	0.639394	f	0.672562	f	0.664783
chr10	19890581	19890950	CGI1348	7	0.563467	0.573964	169	4.14201	Mtap7	"NM_001198635,NM_008635"	intron	0.0812092	0.100789	0.0125	0.0153846	0.252943	0	f	0.879643	f	0.921932	m	0.0153374
chr10	20031534	20033233	CGI1349	144	0.962001	0.632422	1499	9.6064	Bclaf1	"NM_153787,NM_001025393,NM_001025392"	exon	0.007943	0.00561791	0.00583161	0.0065166	0.00283597	0.00681992	m	1	f	0.906722	f	0.875964
chr10	20067076	20068095	CGI1350	57	0.914822	0.553114	819	6.95971	Fam54a	"NM_027930"	exon	0.0100228	0.00246305	0.00586363	0.00247364	0.00174872	0.0113276	m	0.488128	m	0.826463	f	0.520205
chr10	20119711	20120527	CGI1351	36	0.670573	0.592532	616	5.84416	Pde7b	"NM_013875"	exon	0.14072	0.114451	0.0114847	0.0143227	0.00563665	0.0038808	m	0.621925	f	0.860555	m	0.854154
chr10	20150962	20151330	CGI1352	10	0.777754	0.559524	168	5.95238	Pde7b	"NM_013875"	intron	0.166572	0.146329	0.0106509	0.00750916	0.0678926	0.010989	m	0.952398	m	1	m	0.173698
chr10	20671751	20672982	CGI1353	93	0.903219	0.633366	1031	9.02037	Ahi1	"NM_026203"	exon	0.0146615	0.0225422	0.00983916	0.0130527	0.0079824	0.00775076	f	0.670859	f	0.85834	m	0.644608
chr10	20673967	20674488	CGI1354	26	1.07197	0.563863	321	8.09969	Ahi1	"NM_026203"	intron	0.163986	0.116524	0.00534759	0.00240385	0.00409395	0.0190058	m	0.9512	m	1	f	0.864186
chr10	20713803	20714159	CGI1355	9	0.532225	0.666667	156	5.76923	Ahi1	"NM_026203"	intron	0.127606	0.259822	0.0558748	0.0162281	0.0146193	0.0150376	f	0.666144	m	0.48155	f	0.642306
chr10	20864670	20865112	CGI1356	12	0.521655	0.623967	242	4.95868	Myb	"NM_001198914,NM_010848"	exon	0.00833333	0	0.0122549	0.00833333	0.00998217	0.00350877	m	0.794615	m	0.902922	m	0.780923
chr10	20878526	20881737	CGI1357	203	0.742387	0.604782	3011	6.74195	Myb	"NM_001198914,NM_010848"	exon	0.00995709	0.00546414	0.00910203	0.00749196	0.00625749	0.00511834	m	0.254586	m	0.806649	m	0.530431
chr10	21015515	21016583	CGI1358	84	0.993956	0.624424	868	9.67742	Hbs1l	"NM_001145209,NM_019702,NM_001042593"	exon	0.0134847	0.00936063	0.00872844	0.0025	0.00426602	0.00688468	m	0.911846	m	0.6724	f	1
chr10	21101905	21102260	CGI1359	8	0.742888	0.529032	155	5.16129	Aldh8a1	"NM_178713"	exon	0.14645	0.237153	0.0330084	0.028851	0.0128205	0.00875421	f	0.168184	m	0.991702	m	1
chr10	21138974	21139448	CGI1360	13	0.657178	0.543796	274	4.74453			intergenic	0.120797	0.178571	0.0540816	0.00285714	0.053037	0.00549451	f	0.857076	m	0.671471	m	0.116993
chr10	21190546	21190966	CGI1361	12	0.69172	0.568182	220	5.45455			intergenic	0.243818	0.184337	0.00651738	0.0251422	0.0427648	0.0104167	m	0.817049	f	0.6724	m	0.295494
chr10	21312755	21313393	CGI1362	25	0.646238	0.60274	438	5.70776	1700020N01Rik	"NR_027968"	exon	0.252612	0.174645	0.0170192	0.0103241	0.0128816	0.00499109	m	0.182002	m	0.78159	m	0.571589
chr10	21601911	21602499	CGI1363	26	0.732691	0.60567	388	6.70103	Sgk1	"NM_001161845"	exon	0.00672269	0.00561594	0.00719697	0	0.00208333	0.00591997	m	1	m	0.58402	f	0.642306
chr10	21712566	21713232	CGI1364	26	0.624142	0.598712	466	5.5794	Sgk1	"NM_001161849,NM_001161848,NM_001161847,NM_001161845"	intron	0.00215517	0.00229885	0.00344828	0.0020284	0.012005	0.00407088	f	1	m	1	m	0.705755
chr10	21713330	21714837	CGI1365	100	0.826619	0.609028	1307	7.65111	Sgk1	"NM_001161849,NM_001161848,NM_001161847,NM_001161845,NM_001161850,NM_011361"	exon	0.0133307	0.0155692	0.0107796	0.00644538	0.0186535	0.00536929	f	1	m	1	m	0.100032
chr10	21778044	21778857	CGI1366	37	0.620034	0.634584	613	6.03589			intergenic	0.0122449	0.00753968	0.00310124	0.00805585	0.00763639	0.00174216	m	0.915409	f	1	m	0.390286
chr10	21860493	21860961	CGI1367	13	0.487801	0.649254	268	4.85075	E030030I06Rik	"NM_001254744"	intron	0	0.012605	0.00534759	0	0.0243123	0.00420168	f	0.6843	m	0.78159	m	0.628333
chr10	21862037	21862889	CGI1368	7	0.207811	0.455521	652	1.07362	E030030I06Rik	"NM_001254744"	intron	0.26051	0.161293	0.0302028	0.0252634	0.350063	0.0185708	m	0.511634	m	0.915338	m	0.0686232
chr10	21868000	21870283	CGI1369	137	0.703733	0.611618	2083	6.57705	E030030I06Rik	"NM_001254745,NM_001254744"	exon	0.00658456	0.00404964	0.00473958	0.00870417	0.00664244	0.00588235	m	1	f	0.904065	m	0.642306
chr10	21870405	21870855	CGI1370	22	0.944593	0.612	250	8.8			intergenic	0.00449145	0.00696621	0.00574713	0.0031348	0	0.00324675	f	1	m	1	f	0.642306
chr10	21870903	21871782	CGI1371	48	0.65796	0.656848	679	7.06922			intergenic	0.00788889	0.00306297	0.00625455	0.0167935	0.00312188	0	m	0.800345	f	0.822135	m	0.61684
chr10	21873899	21874493	CGI1372	47	1.03254	0.682741	394	11.9289			intergenic	0.0113889	0.00985714	0.00258398	0.00644841	0.00531915	0.00952381	m	0.982519	f	0.904947	f	0.864186
chr10	21878105	21878557	CGI1373	21	0.713549	0.694444	252	8.33333	Raet1a	"NM_009016"	exon	0.00833333	0.00673401	0.00925926	0	0	0.00252525	m	1	m	0.687816	f	0.65596
chr10	21878893	21879355	CGI1374	18	0.749299	0.60687	262	6.87023	Raet1a	"NM_009016"	intron	0.00129032	0.0107143	0	0	0.00649351	0.013	f	0.841416	-	NA	f	0.843783
chr10	21993015	21993378	CGI1375	17	0.818106	0.730061	163	10.4294	H60b,Raet1a,Raet1b,Raet1c	"NM_001177775","NM_009016","NM_009017","NM_009018"	exon	0.0163962	0	0.00793651	0.0123457	0	0.0100575	m	0.55207	f	1	f	0.480598
chr10	21993703	21994557	CGI1376	39	0.669595	0.600917	654	5.9633	H60b,Raet1a,Raet1b,Raet1c	"NM_001177775","NM_009016","NM_009017","NM_009018"	intron	0.00564152	0.00531915	0.00241546	0	0	0.00978261	m	0.900829	m	0.782949	f	0.491324
chr10	22364607	22365545	CGI1377	44	0.720274	0.577236	738	5.96206	Slc2a12	"NM_178934"	exon	0.0569095	0.0365414	0.00991779	0.0028271	0.00942287	0.0260535	m	0.298528	m	0.526411	f	0.996855
chr10	22399130	22399585	CGI1378	13	0.669628	0.552941	255	5.09804	Slc2a12	"NM_178934"	intron	0.375412	0.332001	0	0	0.0206036	0.00865801	m	0.911846	-	NA	m	0.644281
chr10	22450080	22452155	CGI1379	155	0.841626	0.629867	1875	8.26667	Tbpl1	"NM_011603"	exon	0.00673021	0.00702311	0.00918862	0.00574686	0.00566861	0.00945558	f	0.890865	m	0.915172	f	0.856196
chr10	22535859	22536482	CGI1380	25	0.779416	0.55792	423	5.91017			intergenic	0.00295858	0.00411523	0	0.019983	0.00405983	0	f	1	f	0.606799	m	0.480598
chr10	22538882	22539857	CGI1381	49	0.670311	0.615484	775	6.32258	Tcf21	"NM_011545"	exon	0	0.006469	0.00879404	0.00590319	0	0.00612245	f	0.658785	m	0.860312	f	0.475897
chr10	22673951	22674319	CGI1382	11	0.951903	0.559524	168	6.54762			intergenic	0.1651	0.163266	0.0190447	0.0047619	0.00929487	0	m	0.950912	m	0.6724	m	0.480598
chr10	23068090	23068687	CGI1383	25	0.756199	0.581864	397	6.29723	Eya4	"NM_010167"	intron	0.00462963	0.00740741	0	0	0	0.0108696	f	1	-	NA	f	0.446611
chr10	23068871	23070761	CGI1384	121	0.724359	0.628994	1690	7.15976	Eya4	"NM_010167"	exon	0.00336885	0.00464763	0.00742074	0.0074819	0.00762063	0.00268199	f	0.919537	f	0.919107	m	0.342171
chr10	23506321	23507776	CGI1385	78	0.836447	0.545817	1255	6.21514	Rps12	"NM_011295"	exon	0.00530303	0.00702528	0.00327381	0.00314905	0.00365749	0.00711806	f	1	m	1	f	0.909339
chr10	23516493	23517367	CGI1386	36	0.715044	0.547478	674	5.34125	1110021L09Rik	"NM_183116"	exon	0.00917538	0	0.00390869	0.00683761	0.00415341	0.00304878	m	0.433154	f	1	m	0.642306
chr10	23614657	23615137	CGI1387	13	0.591395	0.564286	280	4.64286	Vnn1	"NM_011704"	exon	0.0438283	0.0330688	0.00617284	0.00326797	0.014881	0	m	0.768986	m	1	m	0.480598
chr10	23660478	23660925	CGI1388	13	0.943533	0.477733	247	5.26316	Taar2	"NM_001007266"	exon	0.29236	0.290658	0.0284208	0.00226757	0.00623697	0.0021645	m	0.938027	m	0.379631	m	0.642306
chr10	23868881	23869686	CGI1389	45	0.662329	0.671074	605	7.43802	Stx7	"NM_016797"	exon	0.0123919	0.00950761	0.00417112	0.00552399	0.0015873	0.00170068	m	0.892079	f	1	f	0.806753
chr10	23943111	23944004	CGI1390	56	0.69784	0.68254	693	8.08081	Moxd1	"NM_021509"	exon	0.00464744	0.00434518	0.00790331	0.0104997	0.00589947	0.00389881	m	0.923455	f	0.895631	m	0.746467
chr10	24315068	24316446	CGI1391	73	0.641856	0.628183	1178	6.19694	Ctgf	"NM_010217"	exon	0.0198902	0.0279146	0.00984673	0.00667753	0.00422932	0.00617765	f	1	m	0.831005	f	0.707613
chr10	24345028	24345393	CGI1392	8	0.902207	0.472727	165	4.84848			intergenic	0.118163	0.0451295	0.0290226	0.0179622	0.0270739	0	m	0.794615	m	0.78159	m	0.0571671
chr10	24431211	24432418	CGI1393	88	0.858238	0.640516	1007	8.73883	Enpp1	"NM_008813"	exon	0.0109285	0.00598512	0.00124325	0.00490667	0.0139759	0.00356292	m	0.564944	f	0.803781	m	0.061703
chr10	24589411	24590261	CGI1394	43	0.703379	0.613846	650	6.61538	Med23	"NM_027347,NM_001166416"	exon	0.0144748	0.00936339	0.0115471	0.0124733	0.0051787	0.00766978	m	0.899404	f	0.936657	f	1
chr10	24806328	24806867	CGI1395	15	0.467894	0.616519	339	4.42478			intergenic	0.598807	0.689314	0.0163743	0.107702	0.0223285	0.0585358	f	0.678232	f	0.149262	f	0.480598
chr10	24919668	24920200	CGI1396	21	0.620503	0.641566	332	6.3253	Akap7	"NM_018747"	intron	0.00277778	0	0.00520833	0.0107323	0.00166667	0.00277778	m	0.794615	f	0.78159	f	1
chr10	24994695	24995089	CGI1397	5	0.367657	0.530928	194	2.57732	Akap7	"NM_018747"	intron	0.187545	0.0886724	0	0.010101	0.0356125	0.00854701	m	1	f	0.791816	m	0.760507
chr10	25016349	25017276	CGI1398	81	0.948101	0.691884	727	11.1417	Akap7	"NM_018747"	intron	0.0050293	0.0150643	0.0119876	0.0031746	0	0.00174216	f	0.658785	m	0.616176	f	0.642306
chr10	25034095	25034471	CGI1399	10	0.796247	0.545455	176	5.68182			intergenic	0.0260204	0.00649351	0	0.0223665	0.0159429	0.00420168	m	0.794615	f	0.6724	m	0.636482
chr10	25079127	25080538	CGI1400	133	0.899251	0.701899	1211	10.9827	Epb4.1l2	"NM_001199265"	exon	0.0065276	0.00601741	0.00793119	0.0071256	0.00928694	0.00443223	m	1	m	0.837631	m	0.601658
chr10	25713641	25714266	CGI1401	19	0.581678	0.555294	425	4.47059	Tmem200a	"NM_029881"	exon	0.423907	0.300769	0.0409542	0.0295443	0.004329	0.00585399	m	0.332013	m	0.862317	f	0.822841
chr10	25797570	25799044	CGI1402	99	0.745562	0.645997	1274	7.7708	Gm9767,Tmem200a	"NR_028030","NM_029881"	exon	0.0143413	0.0057174	0.00442741	0.00934204	0.00700709	0.00493734	m	0.634447	f	0.78159	m	0.634947
chr10	26093189	26096247	CGI1403	281	0.990374	0.636459	2858	9.83205	L3mbtl3	"NM_172787"	exon	0.00597249	0.00639143	0.00853029	0.00919877	0.00588344	0.00569382	f	1	f	0.82226	m	0.48683
chr10	26415070	26415718	CGI1404	21	0.545662	0.587054	448	4.6875			intergenic	0.00727273	0.0158586	0.0115729	0.005	0.00315152	0.00235294	f	0.585394	m	0.78159	m	0.819629
chr10	27336363	27336750	CGI1405	13	0.626685	0.668449	187	6.95187	Lama2	"NM_008481"	exon	0.0114379	0.00309598	0	0	0.00694444	0.0147059	m	0.888775	-	NA	f	1
chr10	27793918	27795482	CGI1406	107	0.809851	0.6239	1364	7.84457	Ptprk	"NM_008983"	exon	0.0144547	0.00262123	0.0046878	0.00599809	0.00690542	0.00114679	m	0.176247	f	0.928377	m	0.306829
chr10	27795537	27796445	CGI1407	28	0.55874	0.532486	708	3.9548	Ptprk	"NM_008983"	intron	0.0128788	0.00189394	0	0	0	0.00185185	m	0.893004	-	NA	f	0.642306
chr10	28863246	28863656	CGI1408	15	0.800878	0.609524	210	7.14286			intergenic	0.00808543	0	0.00404858	0.0133373	0.0166482	0	m	0.658785	f	0.78159	m	0.354356
chr10	28863796	28864182	CGI1409	8	0.503718	0.586022	186	4.30108	6330407J23Rik	"NM_026138"	exon	0.00416667	0.00752508	0.0141146	0.0125893	0.0053056	0.00446429	f	0.898485	m	1	m	0.831694
chr10	28866266	28867618	CGI1410	88	0.690363	0.666667	1152	7.63889	6330407J23Rik	"NM_026138"	exon	0.0152239	0.00674985	0.0110899	0.00890523	0.00597736	0.00882353	m	0.810729	m	1	f	0.82781
chr10	28867809	28868391	CGI1411	21	0.704234	0.581152	382	5.49738	6330407J23Rik	"NM_026138"	exon	0	0	0.00511509	0.0187299	0.00197628	0	-	NA	f	0.783436	m	0.642306
chr10	28916202	28917438	CGI1412	76	0.789384	0.610039	1036	7.33591	6330407J23Rik	"NM_026138"	exon	0.419687	0.412341	0.0245722	0.0460276	0.0109989	0.0186868	m	1	f	0.553394	f	0.478813
chr10	29032828	29033600	CGI1413	49	0.806118	0.659091	572	8.56643	Echdc1	"NM_001110195,NM_025855"	exon	0.00173611	0.00881834	0.00102881	0.00593542	0.00367738	0.0093032	f	0.911577	f	0.78159	f	0.910212
chr10	29081097	29082381	CGI1414	112	0.872363	0.690037	1084	10.3321	Rnf146	"NM_026518,NM_001110196,NM_001110198,NM_001110197"	exon	0.00859001	0.00640252	0.00642786	0.00841055	0.00810359	0.00659497	m	0.758293	f	0.915172	m	0.710314
chr10	29253235	29253639	CGI1415	8	0.480105	0.573529	204	3.92157	Rspo3	"NM_028351"	intron	0.00641026	0.00868056	0.00390625	0.00641026	0	0	f	0.944554	f	1	-	NA
chr10	29254182	29254679	CGI1416	14	0.522813	0.602694	297	4.7138	Rspo3	"NM_028351"	intron	0.00396825	0.0156555	0.00505051	0	0.0176367	0	f	0.794615	m	0.78159	m	0.480598
chr10	29255128	29256045	CGI1417	51	0.747918	0.638773	717	7.11297	Rspo3	"NM_028351"	exon	0.00206612	0.0197765	0.0116701	0.0116661	0.00844179	0.00277778	f	0.523568	m	1	m	0.521086
chr10	29919866	29920657	CGI1418	48	0.821464	0.629442	591	8.12183	Cenpw	"NM_001109747"	exon	0.0135995	0.00441176	0.015405	0.00869784	0.00348297	0.00108932	m	0.773821	m	0.78159	m	0.642306
chr10	30319853	30320865	CGI1419	53	0.710994	0.610837	812	6.52709	Trmt11	"NM_028604"	exon	0.0162138	0.0122901	0.00879858	0.00488506	0.0125326	0.00666056	m	0.938957	m	0.776718	m	0.870312
chr10	30337773	30338600	CGI1420	44	0.773899	0.602871	627	7.01754	Hint3	"NM_025798"	exon	0.00629209	0.00878363	0.00266554	0.00247599	0	0.0067791	f	0.875182	m	1	f	0.480598
chr10	30522251	30523645	CGI1421	101	0.761949	0.666667	1194	8.45896	Ncoa7	"NM_172495"	exon	0.00393773	0.0109961	0.00789362	0.00387718	0.00149301	0.00118203	f	0.794615	m	0.717993	m	0.643618
chr10	30561885	30563381	CGI1422	103	0.818031	0.625772	1296	7.94753	Hey2	"NM_013904"	exon	0.00806849	0.00736557	0.00365495	0.00528083	0.0044588	0.00616133	m	1	f	0.947721	f	0.790334
chr10	30563652	30564435	CGI1423	22	0.513265	0.543739	583	3.77358			intergenic	0.00549853	0.00464744	0.00322581	0.00370667	0.00196078	0.00519481	m	1	f	0.90048	f	0.784282
chr10	31032907	31033926	CGI1424	42	0.616542	0.590965	819	5.12821	Hddc2	"NM_027168"	exon	0.0125921	0.00507519	0.00140056	0.0100751	0.0164713	0.0027027	m	0.907725	f	0.590851	m	0.322979
chr10	31164901	31166084	CGI1425	65	0.688839	0.622584	983	6.61241	Tpd52l1	"NM_009413"	exon	0.0102562	0.00772947	0.00872229	0.00909737	0.00588235	0.00621178	m	0.88456	f	0.958604	f	0.643414
chr10	31328006	31329943	CGI1426	175	0.796396	0.711572	1737	10.0748	Rnf217	"NM_001146349"	exon	0.00868357	0.00589199	0.00894324	0.00760369	0.00302663	0.00497185	m	0.782208	m	1	f	0.642306
chr10	32609396	32610645	CGI1427	86	0.766509	0.655863	1049	8.19828	Nkain2	"NM_001025286,NM_001013411"	exon	0.0025974	0.00127714	0.0105038	0.0100867	0.00181936	0.00858742	m	0.900974	m	0.92104	f	0.447665
chr10	33344056	33344589	CGI1428	24	0.709387	0.63964	333	7.20721	Clvs2	"NM_175448"	exon	0	0	0.0239169	0.010669	0.00747126	0.00839965	-	NA	m	0.814713	f	1
chr10	33670541	33671239	CGI1429	35	0.716957	0.628514	498	7.02811	Zufsp	"NM_028287"	exon	0.0134343	0.00253933	0.0017094	0.0126682	0.00611056	0.0025641	m	0.338662	f	0.604475	m	0.642306
chr10	33738713	33740011	CGI1430	96	0.86175	0.638434	1098	8.74317	Rwdd1	"NM_025614"	exon	0.00168252	0.00610797	0.00596432	0.00472054	0.0147704	0.00491071	f	0.415761	m	0.897061	m	0.0570782
chr10	33753628	33754165	CGI1431	15	0.595495	0.548961	337	4.45104			intergenic	0.0116541	0.0185185	0	0.00454545	0	0.0037594	f	0.959107	f	0.78159	f	0.642306
chr10	33847030	33847900	CGI1432	43	0.673429	0.61791	670	6.41791	Fam26f	"NM_175449"	exon	0.0292831	0.0233261	0.00961775	0.00445767	0.00851852	0.00545455	m	0.884828	m	1	m	0.841732
chr10	33926262	33927453	CGI1433	81	0.687193	0.690212	991	8.17356	Dse	"NM_172508"	exon	0.0115183	0.00842142	0.00334923	0.00597885	0.00555225	0.00119048	m	0.900035	f	0.855142	m	0.368464
chr10	34001600	34002833	CGI1434	81	0.823913	0.624395	1033	7.84124	Tspyl1	"NM_009433"	exon	0.00657153	0.00980654	0.00438786	0.00351159	0.00161079	0.00511135	f	0.886979	m	0.860138	f	0.82177
chr10	34017033	34018056	CGI1435	45	0.652267	0.584447	823	5.4678	Tspyl4	"NM_030203"	exon	0.00973913	0.0119826	0.0112111	0.0140556	0.00904018	0	f	0.822706	f	1	m	0.350578
chr10	34137898	34138677	CGI1436	50	0.830567	0.647668	579	8.63558	Nt5dc1	"NM_176968"	exon	0.00616371	0.00276134	0.00797667	0.00901321	0.00970348	0.00120048	m	1	f	0.892663	m	0.380054
chr10	36226241	36227668	CGI1437	88	0.691177	0.644662	1227	7.17196	Hs3st5	"NM_001253356,NM_001253355,NM_001081208"	exon	0.00895243	0.00353572	0.0100128	0.0123463	0.00569084	0.00439276	m	0.867106	f	0.962269	m	0.649278
chr10	36693672	36695314	CGI1438	130	0.806721	0.669209	1442	9.01526	Hdac2	"NM_008229"	exon	0.016255	0.00708792	0.00790629	0.0094415	0.0106725	0.00824343	m	0.446936	f	1	m	0.533554
chr10	36855573	36857748	CGI1439	193	0.910456	0.655696	1975	9.77215	Marcks	"NM_008538"	exon	0.0132852	0.0105688	0.00781809	0.0135835	0.00627998	0.00577985	m	0.799101	f	0.78159	m	0.713111
chr10	36858069	36858953	CGI1440	46	0.890014	0.554094	684	6.72515	Marcks	"NM_008538"	exon	0.00741297	0.00147929	0.00853549	0.00943563	0.00120048	0.00450026	m	0.574907	f	1	f	0.642306
chr10	36859978	36860458	CGI1441	9	0.707422	0.428571	280	3.21429			intergenic	0.00513285	0.00483092	0.00685112	0.00674326	0.00217391	0.00483092	m	0.905517	m	1	f	1
chr10	36860328	36861097	CGI1442	37	0.676831	0.622144	569	6.50264			intergenic	0.0124123	0	0.0149123	0.00502028	0.00459321	0.002849	m	0.252577	m	1	m	0.642306
chr10	38685145	38686171	CGI1443	31	0.447511	0.579903	826	3.75303	Lama4	"NM_010681"	exon	0.00687806	0.00580365	0.00213675	0.00163399	0.00102881	0.00208333	m	0.957631	m	1	f	1
chr10	38750148	38750506	CGI1444	12	0.942726	0.56962	158	7.59494	Lama4	"NM_010681"	exon	0.318846	0.328603	0.0808081	0	0.00763889	0	f	0.957986	m	0.386699	m	0.480598
chr10	38853477	38854263	CGI1445	38	0.704818	0.607509	586	6.48464	1700025K23Rik,Tube1	"NM_183254","NM_028006"	exon	0.00757576	0.00585399	0.00919741	0	0.00619901	0	m	1	m	0.419615	m	0.354356
chr10	38890903	38891419	CGI1446	17	0.658004	0.572785	316	5.37975			intergenic	0	0.00227273	0.0191277	0	0.0026738	0.00506614	f	0.794615	m	0.49563	f	0.814202
chr10	39089039	39090566	CGI1447	120	0.786598	0.681989	1327	9.04295	Fyn	"NM_001122893,NM_008054,NM_001122892"	exon	0.0121623	0.0110783	0.0143036	0.0055324	0.00546239	0.00817914	m	0.940457	m	0.777975	f	0.885376
chr10	39450761	39453218	CGI1448	242	0.924045	0.681436	2257	10.7222	E130307A14Rik,Rev3l	"NR_038037","NM_011264"	exon	0.00770453	0.00655228	0.0119177	0.00982698	0.00231293	0.001295	m	1	m	0.895849	m	0.899301
chr10	39618425	39619337	CGI1449	51	0.709579	0.636236	712	7.16292	AA474331	"NR_033628"	exon	0.0106943	0.0147321	0.0103995	0.0312937	0.00717455	0.0143369	f	0.777952	f	0.821276	f	0.722143
chr10	39646144	39647152	CGI1450	49	0.632032	0.623762	808	6.06436	2010001E11Rik	"NM_001163503"	exon	0.0189155	0.0220351	0.0144289	0.00716324	0.00589346	0	f	0.937266	m	0.871796	m	0.20744
chr10	39679393	39680309	CGI1451	40	0.641182	0.590782	716	5.58659	BC021785,G630090E17Rik	"NM_001113388","NM_001173500"	exon	0.00567766	0.00655675	0.00621196	0.00210084	0.00311111	0.00116959	f	0.957631	m	0.754106	m	0.806753
chr10	39744441	39745383	CGI1452	46	0.616143	0.636119	742	6.19946	AI317395	"NM_144821"	exon	0.0110915	0.00975106	0.00793244	0.00677667	0.00575397	0.00245098	m	0.826916	m	0.940495	m	0.497613
chr10	39861192	39862460	CGI1453	94	0.80015	0.664794	1068	8.8015	Slc16a10	"NM_028247,NM_001114332"	exon	0.0170884	0.0154473	0.00951962	0.00828265	0.012595	0.00276052	m	0.905517	m	0.96931	m	0.0871555
chr10	39966331	39967179	CGI1454	55	1.03861	0.572531	648	8.48765	Rpf2	"NM_023323,NM_001042556"	exon	0.0133098	0.0114017	0.01271	0.00112994	0.00161959	0.00183522	m	0.888775	m	0.6724	f	1
chr10	39977094	39977856	CGI1455	36	0.794359	0.576512	562	6.40569	Gtf3c6	"NM_026113"	exon	0.00430339	0	0.00649727	0.0182706	0.0084126	0	m	0.658785	f	0.78159	m	0.2609
chr10	40020377	40021683	CGI1456	111	0.873849	0.685353	1106	10.0362	Amd1,Amd2	"NM_009665","NM_007444"	exon	0.00612767	0.00429631	0.00402136	0.00884058	0.00469358	0.00248694	m	0.85135	f	0.895631	m	0.578289
chr10	40021866	40022788	CGI1457	48	0.847764	0.567867	722	6.6482	Amd1,Amd2	"NM_009665","NM_007444"	exon	0.0103592	0.00688928	0.00956842	0.00762322	0.00875801	0.00194932	m	0.95045	m	0.848134	m	0.490223
chr10	40068464	40070151	CGI1458	139	0.901937	0.64963	1487	9.34768	Cdk19	"NM_198164,NM_001168304"	exon	0.00837752	0.00787546	0.00596065	0.00944916	0.00573192	0.00625	m	1	f	0.78159	f	0.777917
chr10	40145171	40145526	CGI1459	8	0.550287	0.63871	155	5.16129	Cdk19	"NM_198164,NM_001168304"	intron	0.0134033	0.0128205	0	0.00549451	0.00699301	0	m	0.916567	f	0.78159	m	0.678959
chr10	40256643	40257295	CGI1460	17	0.474845	0.573009	452	3.76106			intergenic	0.184872	0.242291	0.0309438	0.0145677	0.00877193	0.0106326	f	0.758295	m	0.746926	f	1
chr10	40289981	40290495	CGI1461	17	0.565058	0.630573	314	5.41401	Slc22a16	"NM_027572"	exon	0.410897	0.265448	0.0159548	0.00780798	0.00438596	0.0104167	m	0.373214	m	0.925973	f	1
chr10	40402678	40403667	CGI1462	54	0.624032	0.662864	789	6.84411	9030224M15Rik	"NM_177793"	exon	0.0102386	0.00481956	0.00872122	0.00987007	0.000993049	0.00601551	m	0.912201	f	1	f	0.483844
chr10	40530175	40530568	CGI1463	12	0.937223	0.518135	193	6.21762	9030224M15Rik	"NM_177793"	exon	0.626113	0.457326	0.0223214	0.0256944	0.0417399	0.0164583	m	0.369052	f	0.915172	m	0.441399
chr10	40602445	40604636	CGI1464	174	0.904623	0.621798	1991	8.73933	Cdc40,Wasf1	"NM_027879","NM_031877"	exon	0.00882479	0.00727139	0.00617654	0.00396517	0.00385118	0.00789633	m	0.939788	m	0.851071	f	0.983581
chr10	40790278	40791836	CGI1465	80	0.674735	0.591311	1358	5.89102	Gpr6	"NM_199058"	exon	0.0200577	0.00960348	0.00471534	0.00356947	0.00617711	0.00333356	m	0.455414	m	0.78159	m	0.519143
chr10	40791755	40792335	CGI1466	24	0.624936	0.636842	380	6.31579			intergenic	0	0.00833333	0.0188671	0.0131161	0.00285714	0.00606061	f	0.658785	m	0.928377	f	0.784044
chr10	40871272	40871664	CGI1467	10	0.674843	0.557292	192	5.20833			intergenic	0.262162	0.157204	0.0108796	0.0200617	0.0109942	0.00505051	m	0.657745	f	0.9479	m	0.642306
chr10	41022448	41023239	CGI1468	38	0.59141	0.661591	591	6.42978	Fig4	"NM_133999"	exon	0.00592105	0.00511696	0.00522317	0.00733168	0.00309598	0.00190476	m	1	f	0.928671	m	0.822672
chr10	41169974	41170800	CGI1469	55	0.921765	0.618211	626	8.78594	Zbtb24	"NM_153398"	exon	0.0142119	0.0143906	0.00734042	0.00543768	0.00657077	0.00475589	f	1	m	0.929919	m	0.767293
chr10	41195631	41196598	CGI1470	39	0.513669	0.629726	767	5.08475	Mical1	"NM_001164433,NM_138315"	exon	0.00877595	0.0031746	0.0137537	0.00353218	0.00368481	0.0026455	m	0.810729	m	0.591503	m	0.81263
chr10	41197089	41197454	CGI1471	5	0.443867	0.539394	165	3.0303	Mical1	"NM_001164433,NM_138315"	intron	0.02	0	0	0.00526316	0	0.0285714	m	0.800909	f	0.787741	f	0.647263
chr10	41209318	41210757	CGI1472	78	0.719301	0.592413	1239	6.2954	Ppil6,Smpd2	"NM_028430","NM_009213"	exon	0.0109251	0.00967965	0.00990428	0.00974969	0.00737116	0.00674603	m	0.934171	m	0.902613	m	0.660058
chr10	41238266	41240107	CGI1473	151	0.925827	0.630713	1641	9.20171	Cd164	"NM_016898"	exon	0.0049385	0.00490482	0.00371358	0.00538564	0.00814769	0.00753022	m	0.831773	f	1	m	0.535941
chr10	41404262	41404687	CGI1474	14	0.766488	0.595556	225	6.22222			intergenic	0.00624253	0.00566893	0.00597572	0.0107284	0.00226757	0	m	0.939788	f	1	m	0.642306
chr10	41529176	41530993	CGI1475	105	0.77947	0.578231	1617	6.49351	Cep57l1,Sesn1	"NM_026643,NM_029132,NM_001243075,NM_001243074","NM_001162908"	exon	0.00675962	0.00753627	0.00928987	0.00883914	0.00661755	0.00468074	f	0.901493	m	0.926455	m	0.605778
chr10	41606787	41607772	CGI1476	68	0.776681	0.66879	785	8.66242	Sesn1	"NM_001162908,NM_001013370"	exon	0.00801954	0.00966056	0.00645153	0.00257937	0.00331136	0.00512119	f	0.944793	m	0.78159	f	0.905738
chr10	41737586	41738533	CGI1477	51	0.688742	0.630522	747	6.82731	Armc2	"NM_001034858"	exon	0.0051403	0.00295159	0.0244054	0.000790514	0.00235554	0.00465116	m	0.905106	m	0.263022	f	0.889215
chr10	41750823	41751376	CGI1478	15	0.474959	0.611898	353	4.24929			intergenic	0.0643452	0.0404677	0.0191912	0.00555556	0.0314714	0.00777778	m	0.737829	m	0.78159	m	0.419359
chr10	41994106	41998649	CGI1479	374	0.811291	0.652084	4343	8.61156	Foxo3	"NM_019740"	exon	0.011078	0.00777379	0.0066296	0.00708213	0.00904157	0.00402687	m	0.794615	f	1	m	0.347147
chr10	42197776	42198638	CGI1480	46	0.722224	0.620846	662	6.94864	Lace1	"NM_145743"	exon	0.00666667	0.00557692	0.00578836	0.00467532	0	0.004	m	0.844539	m	0.88541	f	0.642306
chr10	42221327	42223005	CGI1481	126	0.900366	0.615697	1478	8.52503	Snx3	"NM_017472"	exon	0.0175542	0.00828995	0.00479763	0.00325398	0.00578002	0.00411167	m	0.719519	m	0.8981	m	0.479383
chr10	42292344	42293179	CGI1482	35	0.611003	0.60315	635	5.51181	Nr2e1	"NM_152229"	exon	0.00454496	0.0100927	0.00470945	0.0066958	0.00503472	0	f	0.838044	f	1	m	0.362069
chr10	42299145	42300481	CGI1483	65	0.585586	0.626761	1136	5.72183	Nr2e1	"NM_152229"	intron	0.00628882	0.0196721	0.00705649	0.00193237	0.0115709	0.00568182	f	0.961506	m	0.6724	m	0.695667
chr10	42301673	42304857	CGI1484	192	0.721494	0.59752	2984	6.43432	Nr2e1	"NM_152229"	exon	0.00546242	0.00307569	0.00936015	0.00809139	0.0072693	0.00298974	m	0.658785	m	1	m	0.127098
chr10	42310960	42312436	CGI1485	87	0.734233	0.615987	1276	6.81818			intergenic	0.00817988	0.00732872	0.00524539	0.00537518	0.00489663	0.00286576	m	0.978217	f	0.952492	m	0.736774
chr10	42333795	42334357	CGI1486	29	0.71341	0.671271	362	8.01105			intergenic	0.0195412	0	0.0105556	0.00213675	0.00894393	0.0146441	m	0.263599	m	0.78159	f	1
chr10	42351413	42352159	CGI1487	25	0.510739	0.600733	546	4.57875			intergenic	0.00592105	0.00833333	0	0.00741627	0.00175439	0	f	1	f	0.6724	m	0.646141
chr10	42352008	42352359	CGI1488	12	0.888928	0.615894	151	7.94702			intergenic	0.0136243	0.012037	0.00411523	0.0227013	0.002849	0.00974026	m	0.931024	f	0.78159	f	0.721368
chr10	42352748	42353281	CGI1489	19	0.534315	0.654655	333	5.70571			intergenic	0.00624303	0	0	0.00568182	0.00505051	0	m	0.658785	f	0.78159	m	0.642508
chr10	42353507	42353986	CGI1490	11	0.705137	0.487455	279	3.94265			intergenic	0.148352	0.0104167	0.00446429	0.00833333	0.015	0.0206349	m	0.182874	f	1	f	0.813977
chr10	42355491	42356169	CGI1491	42	0.730743	0.694561	478	8.78661			intergenic	0.0135417	0.00160256	0.0123874	0	0.0047619	0.0111111	m	0.839397	m	0.6724	f	0.863154
chr10	42356441	42357154	CGI1492	21	0.619635	0.51462	513	4.09357			intergenic	0	0.00459957	0.0100373	0.00297619	0	0	f	0.658785	m	0.78159	-	NA
chr10	42398334	42399320	CGI1493	60	0.710932	0.656489	786	7.63359	Ostm1	"NM_172416"	exon	0.00876262	0.00890687	0.00676129	0.00679382	0.0010989	0.00290043	f	0.85813	f	0.895516	f	0.642306
chr10	42480882	42482393	CGI1494	138	0.920075	0.681922	1311	10.5263	Sec63	"NM_153055"	exon	0.00960735	0.00739499	0.00949652	0.00554997	0.0120163	0	m	0.895438	m	0.82226	m	0.00469438
chr10	42583807	42584363	CGI1495	16	0.594819	0.550562	356	4.49438	Scml4	"NM_172938"	intron	0.0358524	0.0852331	0.018746	0.00793651	0.00977366	0	f	0.847526	m	0.78159	m	0.33943
chr10	42650011	42650526	CGI1496	18	0.617194	0.609524	315	5.71429	Scml4	"NM_172938"	exon	0.204516	0.191569	0.00995671	0	0.00964615	0.00621118	m	0.886119	m	0.58402	m	0.505537
chr10	42740548	42742576	CGI1497	159	0.787276	0.672867	1828	8.69803	Sobp	"NM_175407"	exon	0.0137837	0.010731	0.0108545	0.00739001	0.00782819	0.00283447	m	0.79275	m	0.895631	m	0.199752
chr10	42892778	42895570	CGI1498	206	0.746703	0.652778	2592	7.94753	9030612E09Rik,Sobp	"NM_172419","NM_175407"	exon	0.00577265	0.00579604	0.00781864	0.0122882	0.00552958	0.00576734	f	0.8592	f	0.696	f	0.651885
chr10	42940717	42942018	CGI1499	74	0.704507	0.619437	1101	6.72116	Pdss2	"NM_027772,NM_001168289"	exon	0.0021097	0.0039009	0.0104914	0.00825933	0.0068883	0.00608259	f	0.675791	m	0.884502	m	0.84067
chr10	43198061	43200048	CGI1500	236	0.968465	0.739228	1787	13.2065	Bend3	"NM_199028"	exon	0.008033	0.00613883	0.011962	0.00638573	0.00459511	0.00533662	m	0.985203	m	0.751877	f	0.480598
chr10	43230936	43231705	CGI1501	36	0.673761	0.615114	569	6.32689	Bend3	"NM_199028"	exon	0.252099	0.236036	0.00546018	0.00727147	0.00204082	0.00454545	m	0.971302	f	0.894057	f	0.752302
chr10	43260037	43261140	CGI1502	63	0.687163	0.637874	903	6.97674	1700021F05Rik	"NM_026411"	exon	0.00949346	0.00583028	0.00760492	0.00690104	0.00438483	0.00384615	m	0.794615	m	0.6724	m	0.642306
chr10	43298019	43300045	CGI1503	144	0.759227	0.645126	1826	7.88609	Cd24a	"NM_009846"	exon	0.00861598	0.0111691	0.0063475	0.00355719	0.00614221	0.00917325	f	1	m	0.702761	f	0.867838
chr10	43300504	43300936	CGI1504	10	0.596835	0.538793	232	4.31034	Cd24a	"NM_009846"	intron	0.0114719	0.00416667	0	0	0.00778388	0.00520833	m	0.794615	-	NA	m	0.831694
chr10	43443224	43443676	CGI1505	11	0.536853	0.575397	252	4.36508			intergenic	0.00326797	0	0.00735294	0.00840336	0.0102124	0	m	0.794615	f	0.906921	m	0.480598
chr10	43620998	43621838	CGI1506	53	0.879858	0.614062	640	8.28125	Qrsl1,Rtn4ip1	"NM_001081054","NM_130892"	exon	0.00719748	0.00461857	0.00321637	0.00632172	0.00219298	0.00209644	m	1	f	0.981572	m	0.830748
chr10	43723084	43724627	CGI1507	120	0.811627	0.664929	1343	8.93522	Aim1	"NM_172393"	exon	0.00432726	0.00237149	0.00581813	0.00923311	0.00628777	0.00830312	m	0.798412	f	0.781554	f	0.589063
chr10	43725383	43726025	CGI1508	25	0.545731	0.644796	442	5.65611			intergenic	0.00793651	0	0.0047619	0.00215517	0.00460317	0.00716412	m	0.661286	m	1	f	0.82781
chr10	43868163	43869152	CGI1509	49	0.584603	0.652725	789	6.21039			intergenic	0.0209619	0.00969628	0.00850134	0.0194825	0.010165	0.0070922	m	0.791934	f	1	m	0.777674
chr10	43987677	43988802	CGI1510	68	0.852025	0.59027	925	7.35135	Atg5	"NM_053069"	exon	0.00393836	0.00582429	0.00921547	0.00274788	0.00546472	0.00140845	f	0.926756	m	0.78159	m	0.642306
chr10	44176882	44177406	CGI1511	18	0.655101	0.583333	324	5.55556	Prdm1	"NM_007548"	intron	0	0.00555556	0.00280112	0.0168783	0.00363636	0.00396825	f	0.658785	f	0.78159	f	0.838434
chr10	44178130	44179016	CGI1512	50	0.846394	0.591837	686	7.28863	Prdm1	"NM_007548"	exon	0.00627706	0.00689099	0.00295159	0.00810856	0.00177489	0.003996	f	1	f	0.914713	f	1
chr10	44246718	44247342	CGI1513	22	0.633472	0.573113	424	5.18868			intergenic	0.00722915	0.015076	0.0115319	0.0151251	0.00928346	0.00440917	f	0.820636	f	1	m	0.668607
chr10	44248963	44249833	CGI1514	41	0.732222	0.579104	670	6.1194			intergenic	0.00516796	0.00469025	0.011464	0.00668605	0.00839793	0	m	0.919537	m	0.78159	m	0.354356
chr10	44786291	44787892	CGI1515	115	0.825386	0.630978	1401	8.20842	Prep	"NM_011156"	exon	0.0107072	0.00611111	0.00188492	0.00667702	0.00255848	0.0105669	m	0.838148	f	0.818529	f	0.383333
chr10	45008876	45009887	CGI1516	71	0.795223	0.664612	811	8.75462	Popdc3	"NM_024286"	exon	0.00994991	0.00755942	0.00469667	0.00632168	0.00260063	0.00198413	m	1	f	0.934756	m	0.642306
chr10	45054883	45056166	CGI1517	119	1.06275	0.643583	1083	10.988	Bves	"NM_024285"	exon	0.0106	0.00956007	0.00588978	0.00527553	0.00465461	0.00805322	m	0.838044	m	1	f	0.995184
chr10	45205249	45206963	CGI1518	206	1.08822	0.711361	1514	13.6063			intergenic	0.0079263	0.00468242	0.00920063	0.0117053	0.00947062	0.00361361	m	0.519162	f	0.894057	m	0.145998
chr10	45297349	45298766	CGI1519	107	0.925322	0.636812	1217	8.79211	Hace1	"NM_172473"	exon	0.00500883	0.00987331	0.00129274	0.00793258	0.00452899	0.00340292	f	0.835263	f	0.78159	m	0.720285
chr10	45594978	45595358	CGI1520	12	0.79157	0.583333	180	6.66667			intergenic	0.409222	0.291859	0.0738436	0	0.0138889	0.00326797	m	0.666686	m	0.0624387	m	1
chr10	49502717	49503372	CGI1521	28	0.831254	0.545055	455	6.15385	Grik2	"NM_010349,NM_001111268"	exon	0.00588235	0.00198413	0.0171586	0.0057423	0.00326797	0	m	1	m	0.807683	m	0.642306
chr10	49507942	49509135	CGI1522	54	0.623763	0.591138	993	5.43807	Grik2	"NM_010349,NM_001111268"	exon	0.0067623	0.00825097	0.0145062	0.00809705	0.00884087	0.00497558	f	0.9467	m	0.921601	m	0.772845
chr10	50312046	50313161	CGI1523	78	0.915391	0.615301	915	8.52459	Ascc3	"NM_198007"	exon	0.0106667	0.00823945	0.00903614	0.0128951	0.00606087	0.00453297	m	0.889903	f	0.6724	m	0.779171
chr10	50613888	50615345	CGI1524	98	0.789493	0.630867	1257	7.79634			intergenic	0.0121374	0.002589	0.00639054	0.00857362	0.00398338	0.0026936	m	0.291677	f	0.864654	m	0.642306
chr10	50620377	50621315	CGI1525	40	0.645472	0.579946	738	5.42005	Sim1	"NM_011376"	intron	0.00395997	0.0156559	0.00697674	0.00947105	0.00145349	0.00390307	f	1	f	0.877407	f	0.797721
chr10	50622628	50623572	CGI1526	35	0.624762	0.551075	744	4.7043	Sim1	"NM_011376"	intron	0.00772219	0.00160256	0.00197239	0	0.00383222	0.00147059	m	0.658785	m	0.78159	m	0.78661
chr10	50624109	50624806	CGI1527	28	0.721705	0.559356	497	5.6338	Sim1	"NM_011376"	exon	0.00178253	0.0030303	0.002331	0.00252525	0	0.00710454	f	1	f	1	f	0.354356
chr10	50630149	50630694	CGI1528	16	0.582496	0.565217	345	4.63768	Sim1	"NM_011376"	exon	0.0162338	0.0164502	0	0.01	0.00679825	0.00277778	f	0.874449	f	0.78159	m	0.806753
chr10	51309988	51310411	CGI1529	16	0.712256	0.636771	223	7.17489	Fam162b	"NM_029894"	exon	0.0127083	0.0129371	0.00416667	0.00555556	0.00277778	0.00690476	f	0.874449	f	0.904065	f	0.78661
chr10	51397288	51397984	CGI1530	33	0.609886	0.66129	496	6.65323	Rfx6	"NM_001159389"	exon	0.00438596	0.00219298	0.0164862	0.00701754	0.00671745	0.0116026	m	0.898371	m	0.762118	f	0.823908
chr10	51741833	51742998	CGI1531	67	0.763088	0.611399	965	6.94301	Vgll2	"NM_153786"	exon	0.0033579	0.00874717	0.00687599	0.00731982	0.0034886	0.00734406	f	0.78801	f	0.938321	f	0.991704
chr10	51747017	51748035	CGI1532	68	0.698815	0.704156	818	8.31296	Vgll2	"NM_153786"	exon	0.0117595	0.00891419	0.00756854	0.0107087	0.00480099	0.00813205	m	0.957756	f	0.929423	f	0.928501
chr10	51953050	51954264	CGI1533	93	0.773382	0.69428	1014	9.1716	Dcbld1	"NM_025705"	exon	0.0125843	0.00822692	0.0108701	0.0128336	0.00305373	0.00296703	m	0.863713	f	0.960068	m	0.807637
chr10	52039110	52039953	CGI1534	26	0.48618	0.580093	643	4.04355	Dcbld1	"NM_025705"	exon	0.257505	0.258226	0.0162849	0.0280733	0	0.0103424	f	0.921681	f	0.687816	f	0.258572
chr10	52101044	52102437	CGI1535	90	0.763211	0.630344	1193	7.54401	Gopc	"NM_053187,NM_001199272"	exon	0.0122459	0.00612614	0.00507947	0.00593407	0.00695293	0.00495326	m	0.795906	f	0.882723	m	0.841405
chr10	52136836	52138304	CGI1536	112	0.869615	0.63959	1268	8.83281	Nus1	"NM_030250"	exon	0.0030945	0.00831788	0.00989606	0.00855252	0.00667298	0.000882613	f	0.443592	m	0.893081	m	0.257281
chr10	52265352	52265864	CGI1537	24	0.782508	0.628205	312	7.69231	Zfa	"NR_037920"	exon	0.448156	0.309071	0.0302819	0.0155869	0.0152798	0.0031348	m	0.335357	m	0.62899	m	0.373353
chr10	52313678	52314135	CGI1538	11	0.575668	0.55642	257	4.28016			intergenic	0.297819	0.352393	0.0129468	0.00880952	0.0132962	0.00595238	f	0.791934	m	0.902922	m	0.642306
chr10	52409951	52411565	CGI1539	99	0.63981	0.664074	1414	7.00141	Slc35f1	"NM_178675"	exon	0.00614237	0.00551234	0.00140749	0.00659316	0.00356815	0.00713046	m	0.794615	f	0.6724	f	0.710094
chr10	52424320	52424893	CGI1540	19	0.570218	0.608579	373	5.09383	Slc35f1	"NM_178675"	intron	0.00396825	0.00575397	0.00520833	0.00462963	0.00565611	0.00682261	f	0.905106	m	1	f	1
chr10	53018837	53019243	CGI1541	12	0.86252	0.529126	206	5.82524	Gm9766	"NM_001204983"	intron	0.254111	0.32681	0.0100251	0.010989	0.01875	0.0128788	f	0.835774	f	1	m	0.844402
chr10	53098818	53100050	CGI1542	90	0.75266	0.681202	1032	8.72093	Gm9766	"NM_001204983"	exon	0.0143696	0.00776122	0.010982	0.00890462	0.00703969	0.00358423	m	0.695749	m	0.997353	m	0.162554
chr10	53316099	53317904	CGI1543	170	0.950323	0.667913	1605	10.5919	Asf1a,Mcm9	"NM_025541","NM_027830"	exon	0.0151678	0.00728659	0.00770821	0.0140219	0.0115069	0.00333026	m	0.721755	f	0.793792	m	0.0463616
chr10	53348981	53350227	CGI1544	105	0.988047	0.644359	1046	10.0382	Mcm9	"NM_027830"	exon	0.00637966	0.0104677	0.00383117	0.00514477	0.00488765	0.00568018	f	0.945208	f	0.894057	f	0.853966
chr10	53470118	53471568	CGI1545	106	0.771612	0.668	1250	8.48	Fam184a	"NM_001081428"	exon	0.0175698	0.0232831	0.0152622	0.00453803	0.00871563	0.00619256	f	1	m	0.433366	m	0.501239
chr10	53793843	53796258	CGI1546	168	0.741882	0.639729	2215	7.58465	Gm16998,Man1a	"NR_038016","NM_008548"	exon	0.00381785	0.00776066	0.00206204	0.00875067	0.00690978	0.00630103	f	0.841173	f	0.605131	m	0.961408
chr10	55834627	55835868	CGI1547	76	0.687324	0.652257	1041	7.30067	D630037F22Rik,Msl3l2	"NM_001033385","NM_001163833"	exon	0.00619885	0.00649351	0.00964352	0.00495781	0.0075634	0.00620856	f	0.942095	m	0.721038	m	0.785264
chr10	55948215	55948982	CGI1548	43	0.830581	0.604938	567	7.58377	D630037F22Rik	"NM_001033385"	exon	0.0112837	0.00830652	0.00101317	0.00526024	0.00808247	0.00642044	m	0.875668	f	0.776718	m	0.687053
chr10	56098316	56099126	CGI1549	36	0.678975	0.590164	610	5.90164	Gja1	"NM_010288"	intron	0.00768415	0.0079761	0.00723085	0.00348432	0.0060307	0.0103641	f	0.952439	m	0.684158	f	0.80556
chr10	56107963	56108575	CGI1550	21	0.683133	0.558252	412	5.09709	Gja1	"NM_010288"	exon	0.338207	0.328347	0	0.00676073	0.0244533	0.0126263	m	0.969209	f	0.6724	m	0.295381
chr10	56224256	56224779	CGI1551	17	0.728001	0.541796	323	5.26316			intergenic	0.311209	0.355625	0.0263393	0.00902778	0.0100891	0	f	0.861082	m	0.717993	m	0.170321
chr10	57205676	57206996	CGI1552	118	0.961379	0.6625	1120	10.5357	4930467K11Rik,Hsf2	"NR_045353","NM_008297"	exon	0.00154083	0.00939969	0.00464083	0.00793497	0.00459822	0.00721652	f	0.313711	f	0.766062	f	0.898917
chr10	57251730	57252617	CGI1553	62	0.935851	0.621543	687	9.02475	Serinc1	"NM_019760"	exon	0.00385387	0.00802951	0.0144444	0.0025641	0.00541047	0.00213675	f	0.92614	m	0.519146	m	0.678003
chr10	57351641	57352385	CGI1554	30	0.561086	0.630515	544	5.51471	Pkib	"NM_008863,NM_001039051"	exon	0.0131845	0.0171167	0.0177945	0.0178294	0.0127429	0.00292398	f	0.961	f	0.932	m	0.384618
chr10	57514222	57514946	CGI1555	33	0.617055	0.645038	524	6.29771	Smpdl3a	"NM_020561"	exon	0.010086	0.00163399	0.0033701	0.00555556	0.00899242	0.0246753	m	0.658785	f	1	f	0.814202
chr10	57687046	57687544	CGI1556	17	0.597023	0.620805	298	5.7047			intergenic	0.479009	0.448423	0.0496842	0.122596	0.0333592	0.11579	m	0.875182	f	0.0998199	f	0.00177784
chr10	57687643	57688279	CGI1557	12	0.338324	0.584862	436	2.75229			intergenic	0.388123	0.365226	0.0459231	0.0886361	0.0323533	0.0708669	m	0.873197	f	0.6724	f	0.551278
chr10	57694540	57695051	CGI1558	13	0.444839	0.614148	311	4.18006	Dux	"NM_001081954"	exon	0.522646	0.479232	0.0666649	0.11496	0.0407224	0.0956499	m	0.794615	f	0.299603	f	0.0800608
chr10	57699390	57699768	CGI1559	4	0.326058	0.544944	178	2.24719	Gm4981	"NM_001034869"	exon	0.21862	0.308665	0.0344281	0.0436741	0.0991739	0.0213445	f	0.770469	f	1	m	0.480141
chr10	57717896	57718754	CGI1560	58	0.884463	0.632219	658	8.81459	Gcc2	"NM_027375"	exon	0.00149031	0.0108739	0.00329481	0.00380973	0.00616019	0.00324197	f	0.461663	f	0.935524	m	0.634953
chr10	57785747	57786921	CGI1561	87	0.889525	0.634497	974	8.93224	Lims1	"NM_026148"	exon	0.00357415	0.00288292	0.00459572	0.0075389	0.00482769	0.00343681	m	1	f	0.895631	m	0.716738
chr10	57834264	57834634	CGI1562	8	0.651451	0.558824	170	4.70588	Lims1	"NM_201242,NM_026148"	exon	0.0641826	0.0109559	0.0191388	0	0.0186307	0	m	0.33898	m	0.6724	m	0.354356
chr10	57909102	57910395	CGI1563	116	1.0467	0.637694	1093	10.613	Ranbp2	"NM_011240"	exon	0.00761361	0.00617924	0.0040339	0.0059658	0.00313548	0.00303551	m	0.794615	f	1	m	1
chr10	57960459	57961171	CGI1564	40	0.829362	0.619141	512	7.8125	Ccdc138	"NM_001162956"	exon	0.000905797	0.00144928	0	0.00663363	0.00470318	0.00552105	f	1	f	0.500399	f	1
chr10	58138155	58138734	CGI1565	20	0.55998	0.614776	379	5.27704	Edar	"NM_010100"	exon	0.00320513	0.0510608	0.0135825	0.00644841	0.00505515	0	f	0.234949	m	0.8981	m	0.480598
chr10	58274809	58277290	CGI1566	182	0.763604	0.646646	2281	7.97896	Sh3rf3	"NM_172788"	exon	0.010705	0.00673055	0.00707119	0.00624222	0.00509261	0.00564933	m	0.826139	m	0.894742	f	0.786
chr10	58683825	58686248	CGI1567	173	0.739538	0.650922	2223	7.78228	Sept10,Sowahc	"NM_001024911,NM_001024910","NM_172939"	exon	0.0116791	0.011265	0.00855419	0.01113	0.00564394	0.00446429	m	0.895042	f	0.764419	m	0.846703
chr10	58742915	58743589	CGI1568	16	0.431624	0.561181	474	3.37553			intergenic	0.150463	0.187864	0.0183333	0.00658333	0.0378568	0.00454545	f	0.794615	m	0.999265	m	0.0261088
chr10	58785562	58786939	CGI1569	95	0.761293	0.651657	1177	8.07137	P4ha1	"NM_011030"	exon	0.00620851	0.00762024	0.00688144	0.0082138	0.00781408	0.00521922	f	0.976158	f	0.934636	m	0.826463
chr10	58898501	58898968	CGI1570	16	0.845271	0.546816	267	5.99251	Oit3	"NM_010959"	exon	0.177542	0.171974	0.00292398	0.0206668	0.0150106	0	m	1	f	0.6724	m	0.257251
chr10	58966426	58966863	CGI1571	10	0.641175	0.514768	237	4.21941	Ccdc109a	"NM_001033259"	intron	0.241779	0.108964	0.00543478	0.0261387	0.00255754	0.0147392	m	0.369052	f	0.6724	f	0.749983
chr10	59002155	59002561	CGI1572	13	0.575014	0.669903	206	6.31068	Ccdc109a	"NM_001033259"	intron	0.00833333	0	0.0127273	0.0031746	0.0171123	0	m	0.794615	m	0.89173	m	0.354356
chr10	59052627	59053040	CGI1573	11	0.656823	0.56338	213	5.16432	Ccdc109a	"NM_001033259"	intron	0.102915	0.121989	0.00510204	0.00446429	0.384352	0	f	0.912265	m	1	m	0.000300105
chr10	59078427	59079788	CGI1574	97	0.75236	0.667528	1161	8.35487	Ccdc109a	"NM_001033259"	exon	0.0150368	0.002997	0.00348937	0.013442	0.00511931	0.0149044	m	0.0623077	f	0.668432	f	0.786846
chr10	59164912	59165789	CGI1575	43	0.683405	0.615953	677	6.35155	Micu1	"NM_144822"	exon	0.00601079	0.00261438	0.00495024	0.010274	0.00875782	0	m	0.818282	f	0.922966	m	0.186898
chr10	59341844	59343248	CGI1576	94	0.871617	0.598837	1204	7.80731	Dnajb12	"NM_019965"	exon	0.00668265	0.00722564	0.00472742	0.00636135	0.00807848	0.00664363	f	0.902216	f	1	m	0.808737
chr10	59362267	59362690	CGI1577	11	0.394816	0.70852	223	4.93274			intergenic	0.00404858	0.00591716	0	0.0141026	0.0396009	0.00854701	f	1	f	0.6724	m	0.354356
chr10	59374191	59374685	CGI1578	15	0.518095	0.646259	294	5.10204			intergenic	0.0225702	0.00297619	0.00646412	0.0136054	0.00793651	0.0138889	m	0.658785	f	0.904065	f	0.814534
chr10	59383576	59384216	CGI1579	20	0.567461	0.581818	440	4.54545			intergenic	0.00870209	0.0158378	0.00285714	0	0.00615385	0	f	0.994818	m	0.78159	m	0.484006
chr10	59405017	59405533	CGI1580	17	0.84415	0.53481	316	5.37975			intergenic	0.036803	0.0774411	0.0113282	0.0214085	0.0288282	0	f	0.944726	f	0.883395	m	0.384786
chr10	59413340	59415627	CGI1581	132	0.639804	0.629133	2087	6.32487	Ddit4	"NM_029083"	exon	0.00720822	0.00620253	0.00250096	0.0041196	0.00617217	0.00631248	m	1	f	0.9604	f	0.861853
chr10	59432718	59433195	CGI1582	18	0.781641	0.588448	277	6.49819			intergenic	0.0075188	0	0	0.0110276	0.00292398	0.0037594	m	0.794615	f	0.500399	f	1
chr10	59465266	59466405	CGI1583	68	0.760085	0.617678	939	7.24175	Anapc16,Ascc1	"NM_025514","NM_026937,NM_001199187"	exon	0.0120764	0.00671612	0.0101203	0.00452564	0.00834809	0.00868286	m	0.802521	m	0.776718	f	1
chr10	59568456	59570726	CGI1584	128	0.617565	0.633816	2070	6.18357	Spock2	"NM_052994"	exon	0.0101296	0.007304	0.0115396	0.00663072	0.00609615	0.00976601	m	0.900657	m	0.852375	f	0.950197
chr10	59648401	59649721	CGI1585	71	0.68062	0.610714	1120	6.33929	Chst3	"NM_016803"	exon	0.0868982	0.0876517	0.0135847	0.00437107	0.0209237	0.00582602	f	0.878012	m	0.456541	m	0.0319815
chr10	59654368	59654960	CGI1586	19	0.600631	0.591837	392	4.84694	Chst3	"NM_016803"	intron	0.00239234	0.003663	0.0230311	0.00409091	0.0116322	0.00619835	f	1	m	0.589621	m	0.838248
chr10	59680896	59682555	CGI1587	98	0.651667	0.643592	1459	6.71693	Chst3	"NM_016803"	exon	0.00678226	0.00305206	0.00343764	0.0102399	0.00374608	0.00618557	m	0.794615	f	0.729517	f	0.887375
chr10	59720031	59720534	CGI1588	13	0.545712	0.570957	303	4.29043			intergenic	0.0652244	0.133128	0.0305126	0	0.0453034	0.00793269	f	0.456144	m	0.206927	m	0.221904
chr10	59740048	59741090	CGI1589	60	0.731772	0.624703	842	7.12589	Psap	"NM_001146123,NM_001146121,NM_011179,NM_001146122,NM_001146120"	exon	0.00418527	0.0101563	0.00923271	0.00587607	0.00370593	0.00574888	f	1	m	0.6724	f	0.8551
chr10	59773561	59773961	CGI1590	13	0.707764	0.615	200	6.5	Cdh23	"NM_001252635,NR_045556,NM_023370"	exon	0.124974	0.156334	0.0220278	0.01221	0.394968	0	f	0.794615	m	0.618309	m	7.86116e-06
chr10	59809166	59810131	CGI1591	39	0.532372	0.622222	765	5.09804	4632428N05Rik,Cdh23	"NM_028732,NM_001159572","NM_001252635,NR_045556,NM_023370"	exon	0.0200516	0.00587302	0.0150877	0.00508351	0.00850088	0	m	0.758293	m	0.837294	m	0.262103
chr10	60029089	60029704	CGI1592	16	0.479334	0.571084	415	3.85542	Cdh23	"NM_001252635,NR_045556,NM_023370"	intron	0.0468478	0.0831816	0	0.0164181	0.0730506	0	f	0.831647	f	0.500399	m	0.0403962
chr10	60148368	60150774	CGI1593	174	0.750865	0.648685	2206	7.88758	Cdh23	"NM_001252635,NR_045556,NM_023370"	exon	0.0144254	0.0105415	0.0089376	0.00446985	0.00730029	0.00926764	m	0.66251	m	0.78159	f	0.872868
chr10	60154165	60154646	CGI1594	13	0.622842	0.580071	281	4.62633	Cdh23	"NM_001252635,NR_045556,NM_023370"	intron	0.225074	0.148579	0.00346021	0.0133053	0.00861557	0	m	0.808813	f	0.893081	m	0.490223
chr10	60215132	60215796	CGI1595	31	0.605675	0.670259	464	6.68103	Slc29a3	"NM_023596"	exon	0.016934	0.0157828	0.0109819	0.0116162	0.00942761	0	m	0.939716	f	0.920466	m	0.480598
chr10	60242698	60243226	CGI1596	20	0.680321	0.60061	328	6.09756	Unc5b	"NM_029770"	exon	0.0505225	0.0759538	0.00781028	0.0127446	0.0268952	0.00595238	f	0.830674	f	0.915172	m	0.269592
chr10	60270547	60271082	CGI1597	17	0.539687	0.614925	335	5.07463	Unc5b	"NM_029770"	intron	0.106966	0.105608	0.0332182	0.0132895	0.556522	0.00347222	m	1	m	0.6724	m	8.26726e-06
chr10	60289038	60290087	CGI1598	37	0.487983	0.605418	849	4.35807	Unc5b	"NM_029770"	intron	0.0193339	0.0255631	0.00423977	0.00164474	0.0117387	0.00657895	f	1	m	0.92241	m	0.665185
chr10	60293050	60294734	CGI1599	147	0.937207	0.653639	1484	9.90566	Unc5b	"NM_029770"	exon	0.00387587	0.00681569	0.00904227	0.0034567	0.00465297	0.00463902	f	0.800909	m	0.6724	m	1
chr10	60551885	60552531	CGI1600	27	0.534171	0.674888	446	6.05381	Pcbd1	"NM_025273"	exon	0.00959596	0.0112812	0.00396825	0.0284014	0.00654762	0.00266667	f	0.942314	f	0.672562	m	0.822672
chr10	60608792	60610908	CGI1601	149	0.660081	0.7119	1916	7.77662	Sgpl1	"NM_009163"	exon	0.0110183	0.00284851	0.00922087	0.014032	0.00776313	0.00244486	m	0.189906	f	0.78159	m	0.480598
chr10	60638520	60638980	CGI1602	16	0.662026	0.611538	260	6.15385	Tbata	"NM_023064,NM_001017441,NM_001017433,NM_001017419,NM_001017409,NM_001017407"	exon	0.0417646	0.0195466	0.005245	0.0127268	0	0	m	0.757046	f	0.899909	-	NA
chr10	60708420	60709013	CGI1603	24	0.672503	0.605598	393	6.10687	Adamts14	"NM_001081127"	exon	0.204934	0.0896888	0.00240385	0.0308381	0.00271392	0.00784929	m	0.331555	f	0.455082	f	1
chr10	60735536	60736898	CGI1604	84	0.674772	0.654905	1162	7.22892	Adamts14	"NM_001081127"	exon	0.00750536	0.0086625	0.00847541	0.00834262	0.00850469	0.0139118	f	0.877171	m	0.843781	f	0.809056
chr10	60845490	60846671	CGI1605	72	0.678177	0.662589	981	7.33945	Pald1	"NM_013753"	exon	0.00225225	0.00593776	0.0048871	0.00507601	0.00247748	0.0125161	f	0.896407	f	0.942676	f	0.557989
chr10	60880856	60882256	CGI1606	78	0.714195	0.604167	1200	6.5	Nodal	"NM_013611"	exon	0.0040978	0.0042264	0.00629113	0.00345053	0.00131182	0.00075188	f	0.956619	m	0.894057	m	0.829566
chr10	60914607	60915941	CGI1607	103	0.85788	0.654321	1134	9.08289	Eif4ebp2	"NM_010124"	exon	0.00637402	0.00537466	0.00877949	0.00684561	0.00553385	0.00723382	m	0.943326	m	0.842599	f	0.477047
chr10	60937975	60939604	CGI1608	96	0.704304	0.617915	1429	6.71798	Lrrc20	"NM_153542"	exon	0.00807545	0.0091896	0.0150946	0.0097685	0.00366861	0.00376112	f	0.991109	m	0.805397	f	0.872884
chr10	61057571	61058391	CGI1609	42	0.633306	0.66129	620	6.77419	Npffr1	"NM_001177511"	exon	0.0139358	0.0278281	0.00991015	0.0137929	0.00952381	0.00187617	f	0.91343	f	1	m	0.642306
chr10	61076568	61077177	CGI1610	21	0.617208	0.599022	409	5.13447	Npffr1	"NM_001177511"	exon	0.325102	0.292139	0.00668724	0.00993612	0.0411438	0.00925926	m	0.794615	f	1	m	0.098612
chr10	61087871	61089209	CGI1611	84	0.7544	0.627417	1138	7.38137	Npffr1	"NM_001177511"	exon	0.0102225	0.019519	0.00866493	0.00876088	0.00555687	0.000980392	f	0.670859	f	0.925645	m	0.303604
chr10	61110985	61112191	CGI1612	88	0.83026	0.650099	1006	8.74751	Ppa1	"NM_026438"	exon	0.00304128	0.00439199	0.0028133	0.00427019	0.00494962	0.00625377	f	0.925769	f	1	f	0.917931
chr10	61142637	61143736	CGI1613	83	0.84554	0.664071	899	9.23248	Sar1a	"NM_009120"	exon	0.00815317	0.00535714	0.00813704	0.0116716	0.00643343	0.000603865	m	0.508848	f	0.78159	m	0.115483
chr10	61157775	61159966	CGI1614	174	0.826399	0.650929	1991	8.73933	Tysnd1	"NM_027912"	exon	0.00793246	0.0124408	0.00580113	0.00323321	0.00658706	0.00456051	f	0.919537	m	0.797403	m	0.882391
chr10	61177757	61178435	CGI1615	37	0.759864	0.658996	478	7.74059	Aifm2	"NM_178058,NM_001039194"	exon	0.00707911	0.00797721	0.0042735	0.00879121	0	0.00839965	f	0.850735	f	0.895631	f	0.388301
chr10	61215756	61216377	CGI1616	27	0.738532	0.591449	421	6.4133	H2afy2	"NM_207000"	exon	0.327081	0.303995	0.154416	0.0150206	0.00320513	0.0197436	m	0.910899	m	0.0125667	f	0.640496
chr10	61245374	61247290	CGI1617	139	0.780524	0.644522	1716	8.10023	H2afy2	"NM_207000"	exon	0.00949845	0.014278	0.00713294	0.00324393	0.00670299	0.00486111	f	1	m	0.78159	m	0.795734
chr10	61440307	61442467	CGI1618	129	0.692349	0.616837	1960	6.58163	Col13a1	"NM_007731"	exon	0.00998272	0.00725237	0.00894979	0.00670667	0.00559274	0.00121239	m	0.955687	m	0.829111	m	0.293843
chr10	61573098	61574109	CGI1619	60	0.672771	0.668311	811	7.39827	2010107G23Rik	"NM_027251"	exon	0.00146628	0.0075131	0.00984285	0	0.00230415	0.0100463	f	0.572742	m	0.422036	f	0.480598
chr10	61590534	61590885	CGI1620	13	1.00821	0.589404	151	8.60927			intergenic	0.159562	0.154923	0.0370741	0.0216066	0.0171875	0.0105947	m	0.944793	m	0.78159	m	0.979485
chr10	61591246	61591914	CGI1621	27	0.626388	0.608974	468	5.76923			intergenic	0.0190806	0.00761905	0.00420168	0.0154302	0.00571429	0.0102941	m	1	f	0.676702	f	0.889881
chr10	61595412	61596969	CGI1622	76	0.586996	0.618276	1357	5.60059	Neurog3	"NM_009719"	exon	0.00731364	0.00688264	0.00660451	0.00219027	0.00427993	0.00633185	m	0.979316	m	0.841097	f	1
chr10	61693282	61694503	CGI1623	76	0.759577	0.628795	1021	7.44368	Tspan15	"NM_197996"	exon	0.00874796	0.00405983	0.00590539	0.00525393	0.00184026	0.0046262	m	0.65964	m	1	f	0.671452
chr10	61790329	61790800	CGI1624	12	0.605013	0.546125	271	4.42804	Hk1	"NM_001146100,NM_010438"	intron	0.10614	0.0787588	0.0132021	0.00277778	0.373973	0.00420168	m	0.723181	m	0.6724	m	1.49801e-05
chr10	61802172	61803594	CGI1625	73	0.588373	0.638298	1222	5.97381	2210417K05Rik,Hk1	"NR_038038","NM_001146100,NM_010438"	exon	0.00546474	0.0117628	0.00532846	0.00921438	0.0185217	0.00842015	f	0.873352	f	0.78159	m	0.408649
chr10	61864294	61864779	CGI1626	16	0.620735	0.607018	285	5.61404	Hkdc1	"NM_145419"	exon	0.12024	0.143634	0.00655485	0	0.0912687	0.00292398	f	0.945147	m	0.6724	m	0.00015642
chr10	61867800	61868457	CGI1627	22	0.572113	0.584245	457	4.814	Hkdc1	"NM_145419"	exon	0.165679	0.0745406	0.0107553	0.0108589	0.0138053	0.029732	m	0.471461	f	1	f	0.811568
chr10	61911861	61913234	CGI1628	82	0.866765	0.568627	1173	6.99062	4930507D05Rik,Supv3l1	"NR_027926","NM_181423"	exon	0.00685567	0.00927728	0.004494	0.00392416	0.0111103	0.00586438	f	0.950659	m	0.940495	m	0.272826
chr10	61948793	61950145	CGI1629	97	0.804011	0.651042	1152	8.42014	Vps26a	"NM_133672,NM_001113355"	exon	0.0116055	0.00957699	0.00669444	0.00357143	0.00357906	0.006891	m	0.905106	m	0.940495	f	0.419584
chr10	62040453	62041484	CGI1630	78	0.890231	0.651023	831	9.38628	2510003E04Rik	"NM_028197"	exon	0.00878724	0.0128671	0.00574656	0.000762195	0.00503155	0.00424655	f	0.900035	m	0.532374	m	0.898677
chr10	62064566	62065731	CGI1631	70	0.812722	0.597927	965	7.25389	Ddx21	"NM_019553"	exon	0.0110891	0.0152909	0.00494953	0.00624528	0.00781559	0.00379212	f	0.85135	f	0.826813	m	0.642306
chr10	62113219	62114761	CGI1632	119	0.854399	0.646051	1342	8.86736	Ddx50	"NM_053183"	exon	0.0101788	0.00432828	0.0066104	0.00803696	0.00364737	0.00548413	m	0.545199	f	0.914689	f	0.886751
chr10	62127726	62128156	CGI1633	14	0.789759	0.556522	230	6.08696	Stox1	"NM_001033260"	exon	0.0852312	0.0340195	0.0290319	0.00206612	0.0421373	0.015353	m	0.0206679	m	0.393882	m	0.642306
chr10	62188184	62189426	CGI1634	91	0.799874	0.661228	1042	8.73321	Stox1	"NM_001033260"	exon	0.00249419	0.0131115	0.00631048	0.00257732	0.00831511	0.00446571	f	0.467246	m	0.617394	m	0.539793
chr10	62254239	62255473	CGI1635	109	0.927085	0.676015	1034	10.5416	Ccar1	"NM_026201"	exon	0.00948027	0.012025	0.0065526	0.00639145	0.00295464	0.00719462	f	0.89584	m	0.859771	f	1
chr10	62275428	62275851	CGI1636	14	0.781671	0.569507	223	6.27803	Tet1	"NM_027384,NM_001253857"	exon	0.209246	0.174202	0	0	0.0818892	0	m	0.808947	-	NA	m	0.00317371
chr10	62328164	62328746	CGI1637	18	0.575511	0.575916	382	4.71204	Tet1	"NM_027384,NM_001253857"	intron	0.00667735	0.0187184	0.0235507	0.00551994	0.0172798	0.00757576	f	0.719645	m	0.894742	m	0.642954
chr10	62348736	62350406	CGI1638	88	0.679646	0.598639	1470	5.98639			intergenic	0.00826802	0.00657765	0.00710207	0.005473	0.00322244	0.00273084	m	0.85567	m	0.94282	m	0.695365
chr10	62382640	62384074	CGI1639	88	0.785919	0.602917	1234	7.13128	Slc25a16	"NM_175194"	exon	0.00420042	0.00407034	0.00892478	0.00747922	0.00780732	0.0057307	m	1	m	0.827566	m	0.713508
chr10	62409379	62410332	CGI1640	69	0.926391	0.634794	753	9.16335	Dna2	"NM_177372"	exon	0.00960169	0.00506475	0.00328947	0.00347744	0.00310829	0.00201207	m	0.658785	f	0.828273	m	0.529365
chr10	62442623	62443762	CGI1641	80	0.764928	0.669862	939	8.5197	Rufy2	"NM_027425"	exon	0.0106312	0.00660272	0.0131815	0.00666503	0.00472009	0.00146199	m	1	m	0.50639	m	0.468564
chr10	62453471	62453838	CGI1642	6	0.528321	0.532934	167	3.59281	Rufy2	"NM_027425"	exon	0.210931	0.213246	0	0.0285056	0	0	f	1	f	0.297876	-	NA
chr10	62485406	62487292	CGI1643	146	0.84889	0.643535	1686	8.65955	Hnrnph3,Pbld2	"NM_001079824","NM_026085"	exon	0.00397065	0.00823491	0.0054662	0.0120935	0.0020857	0.00411706	f	0.806185	f	0.61741	f	0.844402
chr10	62562346	62563741	CGI1644	82	0.761329	0.600837	1195	6.86192	Atoh7	"NM_016864"	exon	0.0150109	0.010512	0.00815053	0.00273765	0.00678955	0.00805504	m	1	m	0.78159	f	0.657884
chr10	62593544	62594014	CGI1645	15	0.829773	0.518519	270	5.55556	Mypn	"NM_182992"	exon	0.340727	0.255506	0.00478469	0.0433165	0.00309598	0	m	0.70965	f	0.401495	m	0.642306
chr10	62655096	62656052	CGI1646	33	0.549928	0.564815	756	4.36508	Mypn	"NM_182992"	exon	0.124738	0.14796	0.0438935	0.002079	0.0109527	0.00877501	f	0.814698	m	0.0998199	m	0.615605
chr10	62706285	62707426	CGI1647	78	0.740567	0.669501	941	8.28905	Herc4	"NM_030114,NM_026101"	exon	0.0111034	0.00887161	0.00806147	0.00293945	0.000822368	0.00759259	m	0.646358	m	0.6724	f	0.642306
chr10	62800804	62802723	CGI1648	202	0.99748	0.691681	1719	11.751	Sirt1	"NM_001159589,NM_019812"	exon	0.0070858	0.00301098	0.00405947	0.00802093	0.00903253	0.00774548	m	0.658785	f	0.755372	m	0.642306
chr10	62844139	62844703	CGI1649	17	0.633685	0.543956	364	4.67033			intergenic	0.00571895	0.0187121	0.0172159	0.00555556	0.00992063	0	f	0.895042	m	0.690245	m	0.354356
chr10	62844980	62845717	CGI1650	26	0.734744	0.523277	537	4.84171	Dnajc12	"NM_001253685"	exon	0.00492611	0.00598659	0.00383142	0.0132881	0.0058096	0	f	0.903753	f	0.681068	m	0.480598
chr10	62849139	62849739	CGI1651	22	0.713759	0.5575	400	5.5	Dnajc12	"NM_001253685,NM_013888"	exon	0.00245098	0.00543478	0	0.00241546	0.011631	0.00189036	f	1	f	0.78159	m	0.627578
chr10	62875546	62875908	CGI1652	7	0.545954	0.574074	162	4.32099			intergenic	0.280435	0.370976	0.0155778	0.121781	0.00217865	0.00882353	f	0.68997	f	0.0917591	f	0.783316
chr10	62884306	62884659	CGI1653	16	1.08647	0.627451	153	10.4575			intergenic	0.522934	0.20124	0.00555556	0.00857143	0.00717949	0.0025	m	0.0189579	f	0.904065	m	0.78661
chr10	62892107	62893147	CGI1654	87	1.042	0.632143	840	10.3571	Ctnna3	"NM_177612"	exon	0.00488591	0.0088616	0.00608962	0.00693163	0.00219093	0.00378788	f	0.92614	f	0.805206	f	1
chr10	63046251	63046747	CGI1655	19	0.922069	0.533784	296	6.41892	Ctnna3	"NM_001164376,NM_177612"	intron	0.125605	0.136738	0.00529827	0.0196364	0.0286779	0.0161981	f	0.878291	f	0.999016	m	0.381568
chr10	63047728	63048240	CGI1656	14	0.736231	0.50641	312	4.48718	Ctnna3	"NM_001164376,NM_177612"	intron	0.334997	0.258898	0.0171694	0.0357278	0.0686181	0.0163043	m	0.658785	f	0.843781	m	0.030902
chr10	63349437	63349857	CGI1657	11	0.687126	0.540909	220	5	Ctnna3	"NM_001164376,NM_177612,NM_001164519"	intron	0.169563	0.149327	0.00396825	0.033354	0.0193223	0.00310559	m	0.937644	f	0.534011	m	0.429973
chr10	63550494	63551178	CGI1658	23	0.562477	0.582645	484	4.75207	Ctnna3,Lrrtm3	"NM_001164376,NM_177612,NM_001164519","NM_178678"	exon	0.00920635	0.0026455	0	0.003367	0	0	m	0.905106	f	0.6724	-	NA
chr10	66235523	66235940	CGI1659	11	0.822659	0.497696	217	5.06912			intergenic	0.404126	0.213672	0.00779487	0	0.0182073	0.0318182	m	0.220804	m	0.6724	f	0.87467
chr10	66376007	66376410	CGI1660	11	0.846813	0.507389	203	5.41872			intergenic	0.141859	0.150057	0	0.0234729	0.0114152	0.0126923	f	1	f	0.58402	f	0.770585
chr10	66465411	66465804	CGI1661	14	0.618414	0.689119	193	7.25389			intergenic	0.0124861	0.00362319	0.0108297	0.00207039	0.00334448	0.00543478	m	0.891012	m	0.894742	f	1
chr10	66558694	66560396	CGI1662	173	0.948508	0.697736	1502	11.518	Reep3	"NM_178606,NM_001204915"	exon	0.00578971	0.00938527	0.00768269	0.00465118	0.00611241	0.00994086	f	0.895875	m	0.777094	f	0.494611
chr10	66589102	66590533	CGI1663	156	1.09689	0.683997	1231	12.6726	Jmjd1c	"NM_207221"	exon	0.00854672	0.00848659	0.00517337	0.00438354	0.00597249	0.00506029	m	0.852129	m	0.945826	m	0.649325
chr10	66648360	66648761	CGI1664	8	0.662855	0.492537	201	3.9801	Jmjd1c	"NM_207221,NM_001242396"	exon	0	0	0.00568182	0.00520833	0.0759876	0.003125	-	NA	m	1	m	0.0114012
chr10	66667919	66668290	CGI1665	10	0.69638	0.602339	171	5.84795	Jmjd1c	"NM_001242396,NM_207221"	intron	0.162491	0.291476	0.0199095	0	0.380631	0.00187617	f	0.283146	m	0.6724	m	0.000290345
chr10	66747249	66748651	CGI1666	97	0.793304	0.638935	1202	8.06988	Nrbf2	"NM_001036293"	exon	0.015704	0.010393	0.00742142	0.0015929	0.00417815	0.00796388	m	0.768986	m	0.6724	f	0.858326
chr10	66921377	66921856	CGI1667	14	0.687728	0.541219	279	5.01792			intergenic	0.0500777	0.0639975	0.00588235	0.0437271	0.00854701	0	f	0.76256	f	0.618419	m	0.642508
chr10	66997665	66999924	CGI1668	138	0.682103	0.629917	2059	6.70228			intergenic	0.00810043	0.009028	0.00398671	0.00830725	0.002099	0.00517797	f	0.87056	f	0.6724	f	0.586154
chr10	67000114	67000777	CGI1669	37	0.865676	0.609071	463	7.99136	Egr2	"NM_010118"	exon	0.011358	0.00492424	0.00631808	0.00847042	0.00407407	0.00178891	m	0.916426	f	0.78159	m	0.807793
chr10	67000818	67002067	CGI1670	67	0.665305	0.627264	1049	6.38704	Egr2	"NM_010118"	exon	0.00733305	0.00796457	0.0072574	0.00448047	0.00339766	0.00367965	f	0.974478	m	0.925809	f	0.72465
chr10	67010436	67012552	CGI1671	181	0.876074	0.65762	1916	9.44676	Ado	"NM_001005419"	exon	0.0101788	0.00738001	0.00686309	0.00291194	0.00294829	0.00128321	m	0.985856	m	0.67366	m	0.481409
chr10	67298994	67299371	CGI1672	14	1.36179	0.514124	177	7.9096			intergenic	0.333206	0.222872	0.0467189	0	0.0612875	0	m	0.459386	m	0.0998199	m	0.103249
chr10	67371860	67372652	CGI1673	31	0.65135	0.567568	592	5.23649	Zfp365	"NM_178679"	exon	0.123346	0.199814	0.00762348	0.0040755	0.00775183	0.00540541	f	0.324065	m	0.922209	m	0.391002
chr10	67374541	67375689	CGI1674	66	0.652601	0.657173	948	6.96203	Zfp365	"NM_178679"	exon	0.0176004	0.00337358	0.00510559	0.0116133	0.00336553	0.00555556	m	0.556211	f	0.78159	f	0.866692
chr10	67383296	67384111	CGI1675	35	0.819369	0.530081	615	5.69106			intergenic	0.312428	0.181325	0.0392157	0.0139194	0.00274725	0.00168067	m	0.0313718	m	0.515668	m	0.983235
chr10	67442138	67442991	CGI1676	52	0.746774	0.655436	653	7.96325	Rtkn2	"NM_001081346"	exon	0.0166315	0.00503309	0.0106314	0.0094226	0.00223214	0.00245098	m	0.658785	m	1	f	1
chr10	67478435	67478897	CGI1677	10	0.507436	0.549618	262	3.81679	Rtkn2	"NM_001081346"	intron	0.305689	0.168309	0	0.0257547	0.0422759	0.00686275	m	0.223098	f	0.617394	m	0.115282
chr10	67560095	67560703	CGI1678	23	0.817436	0.541667	408	5.63725	Arid5b	"NM_023598"	exon	0.186953	0.287921	0.0245989	0.0138736	0.0320669	0.00383772	f	0.0364025	m	0.6724	m	0.0182005
chr10	67599091	67599541	CGI1679	13	0.659202	0.564	250	5.2	Arid5b	"NM_023598"	intron	0	0	0	0.0209076	0.00226244	0	-	NA	f	0.58402	m	0.642306
chr10	67739134	67740248	CGI1680	55	0.680961	0.595186	914	6.01751	Arid5b	"NM_023598"	intron	0.0125192	0.00844156	0.0101455	0.00427726	0.00457125	0	m	0.966746	m	0.926347	m	0.480598
chr10	67745748	67746171	CGI1681	13	0.634712	0.609865	223	5.8296			intergenic	0.00416667	0	0.0155844	0.00929487	0	0.00666667	m	0.794615	m	0.904065	f	0.642306
chr10	67910761	67911228	CGI1682	15	0.960128	0.494382	267	5.61798	1700040L02Rik	"NM_028491"	intron	0.155755	0.224308	0.0113445	0.0100512	0	0.0197874	f	0.634447	m	1	f	0.354356
chr10	68004406	68004882	CGI1683	14	0.654192	0.557971	276	5.07246	1700040L02Rik	"NM_028491"	exon	0.0344797	0.0301627	0.0037037	0.00617284	0.0063962	0.00604575	m	0.931033	f	1	m	1
chr10	68186349	68187361	CGI1684	35	0.501304	0.594828	812	4.31034	Tmem26	"NM_177794"	exon	0.00526608	0.00702614	0.00813008	0.00763498	0.00731474	0.00406504	f	0.919537	m	1	m	0.642306
chr10	68540646	68541102	CGI1685	10	0.521306	0.558594	256	3.90625			intergenic	0.18589	0.131268	0.0530058	0	0.00591716	0	m	0.794615	m	0.281548	m	0.642508
chr10	68675190	68676727	CGI1686	107	0.699497	0.678384	1337	8.00299	Rhobtb1	"NM_001252636,NM_001081347,NM_001252637,NM_001252638"	exon	0.00960231	0.0029822	0.0119886	0.00687345	0.00211393	0.00457875	m	0.546878	m	0.685134	f	0.98076
chr10	68728759	68729169	CGI1687	11	0.753589	0.528571	210	5.2381	Rhobtb1	"NM_001252637,NM_001081347,NM_001252638,NM_001252636"	exon	0.28838	0.2506	0.0380947	0.00980392	0.0215409	0	m	0.876319	m	0.438221	m	0.167373
chr10	68732593	68733361	CGI1688	31	0.648113	0.580986	568	5.45775	Rhobtb1	"NM_001252637,NM_001081347,NM_001252638,NM_001252636"	exon	0.174681	0.180466	0.0192826	0.00525031	0.00160256	0.0111688	f	0.959107	m	0.74054	f	0.583776
chr10	68774647	68775163	CGI1689	17	0.762458	0.53481	316	5.37975			intergenic	0.311011	0.230308	0.0268135	0.00511509	0.0154654	0.00606187	m	0.71671	m	0.436858	m	0.583943
chr10	68814691	68815300	CGI1690	20	0.609035	0.572127	409	4.88998	Cdk1	"NM_007659"	intron	0.0188207	0.00320513	0.0106838	0	0.0096532	0	m	0.561311	m	0.6724	m	0.257847
chr10	68815288	68816079	CGI1691	36	0.714451	0.58714	591	6.09137	Cdk1	"NM_007659"	exon	0.0127391	0.00508594	0.0124278	0.0122182	0.00251503	0	m	1	m	1	m	0.480598
chr10	68861042	68862767	CGI1692	109	0.712996	0.633443	1525	7.14754			intergenic	0.00994322	0.00871753	0.00875717	0.00565539	0.00698834	0.00260417	m	0.906488	m	0.839546	m	0.561173
chr10	69284804	69285324	CGI1693	19	0.762382	0.5625	320	5.9375	Ank3	"NM_170688,NM_170689,NM_170729,NM_146005,NM_170690,NM_170728,NM_170730"	exon	0.215605	0.193645	0.00564713	0.00777778	0.0298995	0	m	0.915861	f	1	m	0.108278
chr10	69467512	69468012	CGI1694	15	0.69806	0.536667	300	5	Ank3	"NM_009670,NM_170688,NM_170687,NM_170689,NM_170729,NM_146005,NM_170690,NM_170728,NM_170730"	exon	0.224768	0.223436	0.0119292	0.0224994	0.121348	0.00292398	m	0.92614	f	0.796334	m	0.000666884
chr10	69522628	69523048	CGI1695	11	0.885628	0.481818	220	5			intergenic	0.13983	0.138851	0.0209062	0.00569332	0.0131011	0.00694444	m	0.911163	m	0.78159	m	0.642954
chr10	69559127	69561124	CGI1696	174	0.794977	0.701169	1797	9.6828	Ccdc6	"NM_001111121"	exon	0.00615846	0.00637884	0.00825897	0.00488473	0.00440974	0.0108225	f	0.871695	m	0.894742	f	0.724656
chr10	69707233	69708776	CGI1697	80	0.599512	0.630678	1343	5.95681	Slc16a9	"NM_025807"	exon	0.0209328	0.0071769	0.00569538	0.00370034	0.00422583	0.00945166	m	0.504652	m	1	f	0.923224
chr10	69902881	69903920	CGI1698	47	0.62506	0.599523	839	5.60191	Fam13c	"NM_001143777,NM_024244,NM_001143776"	exon	0.00710466	0.00918803	0.00472756	0.00567182	0.00609524	0.00347222	f	1	f	1	m	0.517267
chr10	69983070	69983848	CGI1699	30	0.619121	0.579585	578	5.19031	Fam13c	"NM_024244,NM_001143777,NM_001143776"	exon	0.00402813	0.0157411	0.00487034	0.00416667	0	0	f	0.815298	m	1	-	NA
chr10	70061119	70063232	CGI1700	202	0.905393	0.685311	1913	10.5593	Phyhipl	"NM_178621"	exon	0.00607162	0.00224673	0.00441767	0.007048	0.0111794	0.00678008	m	0.321368	f	0.927131	m	0.0831703
chr10	70293401	70293880	CGI1701	15	0.691708	0.562724	279	5.37634			intergenic	0.32748	0.172706	0	0.00736532	0.028717	0	m	0.280211	f	0.6724	m	0.153229
chr10	70621609	70623021	CGI1702	132	0.890603	0.70132	1212	10.8911	Bicc1	"NM_031397"	exon	0.00500552	0.0109707	0.0180427	0.00842875	0.00550574	0.00214192	f	0.835307	m	0.532374	m	0.687132
chr10	70680482	70680853	CGI1703	9	0.614307	0.590643	171	5.26316			intergenic	0.168844	0.219282	0.0078125	0.0104852	0.00390625	0	f	0.878304	f	0.908008	m	0.662271
chr10	70700136	70701334	CGI1704	75	0.721217	0.649299	998	7.51503	Tfam	"NM_009360"	exon	0.00576589	0.00566031	0.00560845	0.00799561	0.00634921	0.00787265	m	0.952357	f	0.90048	f	0.96933
chr10	70713285	70713708	CGI1705	13	0.770386	0.578475	223	5.8296			intergenic	0.182662	0.174089	0.00960735	0.0444966	0.0167879	0.0211683	m	0.965712	f	0.309632	f	0.811341
chr10	70747238	70748695	CGI1706	93	0.806011	0.614161	1257	7.39857	Ube2d1	"NM_145420"	exon	0.0152718	0.00654576	0.00698189	0.00699186	0.0019385	0.00480249	m	0.709695	f	0.78159	f	0.814367
chr10	70762885	70763254	CGI1707	10	0.85216	0.544379	169	5.91716			intergenic	0.163934	0.169279	0.0173204	0.060925	0.0753921	0	f	0.878358	f	0.618309	m	0.098612
chr10	70807039	70808271	CGI1708	77	0.785963	0.617248	1032	7.46124	Cisd1	"NM_134007"	exon	0.00471715	0.00823196	0.00813373	0.00757576	0.00374221	0.00857444	f	0.889191	m	0.963267	f	0.642306
chr10	70810022	70811557	CGI1709	106	0.731522	0.659176	1335	7.94007	Ipmk	"NM_027184"	exon	0.005718	0.00938291	0.00660683	0.00946156	0.00133085	0.00704209	f	0.678499	f	0.827074	f	0.480598
chr10	70844068	70844679	CGI1710	28	0.949158	0.537713	411	6.81265	Ipmk	"NM_027184"	exon	0.219658	0.235802	0.0262949	0.0145975	0.017773	0.00373303	f	0.841909	m	0.736107	m	0.106096
chr10	72117297	72118044	CGI1711	37	0.837335	0.570384	547	6.76417	Zwint	"NM_025635"	exon	0.00633516	0.0109018	0	0.00880474	0.00337731	0.0114341	f	1	f	0.500399	f	0.829111
chr10	72561509	72563224	CGI1712	123	0.787184	0.642904	1515	8.11881			intergenic	0.00844085	0.0029014	0.00537634	0.00988837	0.00925281	0.00774616	m	0.796432	f	0.798624	m	0.93729
chr10	74108166	74108853	CGI1713	22	0.588276	0.556468	487	4.51745	Pcdh15	"NM_001142746,NM_001142760"	exon	0.127316	0.287068	0.0187143	0.0144676	0.0268096	0.0118768	f	0.0189579	m	1	m	0.255841
chr10	74388027	74388702	CGI1714	24	0.642523	0.562105	475	5.05263			intergenic	0.0307812	0.0451341	0.00274725	0.00536243	0.0222222	0.0042735	f	0.876897	f	0.895631	m	0.480598
chr10	74429217	74431031	CGI1715	124	0.759969	0.644362	1614	7.68278	Gnaz,Rtdr1	"NM_010311","NM_001163535,NM_001163534,NM_001163533,NM_027730"	exon	0.00837504	0.000960384	0.0108352	0.0105354	0.00270637	0.00530161	m	0.195891	m	0.899909	f	0.909339
chr10	74499522	74500291	CGI1716	36	0.640451	0.629174	569	6.32689	Rab36	"NM_029781"	exon	0.0205019	0.00146199	0.00797266	0.00420582	0.00162602	0.00406504	m	0.302713	m	0.831178	f	1
chr10	74522667	74525225	CGI1717	225	0.859232	0.666667	2358	9.54198	Bcr	"NM_001081412"	exon	0.00680267	0.0126478	0.00571491	0.010381	0.00965144	0.00378553	f	0.760633	f	1	m	0.136489
chr10	74674387	74675549	CGI1718	81	0.749994	0.671518	962	8.41996	Specc1l	"NM_153406,NM_001145826"	exon	0.00946478	0.009654	0.00973558	0.00429097	0.00231481	0.0148291	f	1	m	1	f	0.55836
chr10	74779310	74780782	CGI1719	97	0.708977	0.665094	1272	7.62579	Adora2a	"NM_009630"	exon	0.00977615	0.00905033	0.00795985	0.00672201	0.000811688	0.00411523	m	0.950252	m	0.833599	f	1
chr10	74788764	74789163	CGI1720	12	0.734862	0.58794	199	6.03015	Adora2a	"NM_009630"	exon	0.188302	0.187613	0.0262729	0.0113095	0.0499652	0	m	0.934836	m	0.612056	m	0.0183675
chr10	74795957	74796530	CGI1721	17	0.497344	0.616622	373	4.55764	Adora2a	"NM_009630"	exon	0.173013	0.184847	0.0136102	0.0120773	0.0298827	0	f	1	m	1	m	0.066408
chr10	74906892	74907305	CGI1722	14	0.861681	0.553991	213	6.57277			intergenic	0.237907	0.167746	0.0588688	0.0133929	0.0760783	0.00544508	m	0.719645	m	0.455348	m	0.0363016
chr10	74979541	74981332	CGI1723	96	0.651836	0.612822	1591	6.03394	1110038D17Rik,Snrpd3	"NM_175133","NM_026095"	exon	0.00607324	0.0077658	0.00402411	0.00324904	0.0054857	0.00620578	f	0.961348	m	0.934285	f	0.977218
chr10	75021944	75023600	CGI1724	88	0.619479	0.625687	1456	6.04396	AI646023	"NM_198860"	exon	0.00494953	0.0104455	0.00307332	0.00452434	0.0103373	0.000632511	f	0.587032	f	0.927067	m	0.28735
chr10	75052301	75052887	CGI1725	16	0.472855	0.601036	386	4.14508	Ggt5	"NM_011820"	exon	0.231483	0.130939	0.0194444	0.00866597	0.231145	0.020643	m	0.433006	m	0.938227	m	0.000104817
chr10	75066460	75066842	CGI1726	9	0.693203	0.576923	182	4.94505	Ggt5	"NM_011820"	exon	0.305075	0.342116	0.00701754	0.0176052	0.0235371	0.00526316	f	0.856063	f	0.80634	m	0.480598
chr10	75129715	75131180	CGI1727	89	0.659252	0.654545	1265	7.03557	Cabin1	"NM_172549"	intron	0.0100848	0.00723347	0.00448193	0.00455496	0.0121339	0.00402237	m	0.903753	f	1	m	0.25144
chr10	75226441	75227562	CGI1728	68	0.876549	0.58089	921	7.38328	Cabin1	"NM_172549"	exon	0.00692046	0.00367893	0.00796169	0.00485892	0.0160943	0.00803695	m	0.613632	m	0.720033	m	0.783316
chr10	75235351	75236224	CGI1729	38	0.655979	0.592868	673	5.64636	Ddt	"NM_010027"	exon	0.0107698	0.00861291	0.00613276	0.00963905	0.00938109	0.0013587	m	0.927041	f	0.6724	m	0.462986
chr10	75243441	75244083	CGI1730	20	0.524294	0.588235	442	4.52489	Gstt3	"NM_133994"	exon	0.00324675	0.00503247	0.0120261	0.00238095	0.00870181	0	f	0.900838	m	0.672562	m	0.258572
chr10	75296778	75297528	CGI1731	28	0.656764	0.56	550	5.09091	Gstt2	"NM_010361"	exon	0.00604287	0.00494247	0.0109034	0.00224467	0.0059064	0.00632799	m	0.841587	m	0.534011	f	1
chr10	75299775	75300496	CGI1732	27	0.634839	0.571977	521	5.18234			intergenic	0	0.00492611	0	0.00689655	0.0140974	0	f	0.794615	f	0.78159	m	0.354356
chr10	75322177	75323316	CGI1733	60	0.652627	0.626198	939	6.38978	Mif	"NM_010798"	exon	0.0260977	0.00677966	0.00328947	0.00166667	0.00941358	0	m	0.26239	m	0.894742	m	0.386448
chr10	75355712	75356922	CGI1734	67	0.676255	0.627723	1010	6.63366	Derl3	"NM_024440"	exon	0.013705	0.014248	0.022936	0.0130647	0.00237293	0.00670852	f	0.893486	m	0.676472	f	0.829026
chr10	75383519	75384968	CGI1735	99	0.833738	0.617294	1249	7.92634	Smarcb1	"NM_001161853,NM_011418"	exon	0.0062557	0.0101926	0.00972555	0.000739645	0.00279139	0.00255532	f	0.934055	m	0.107445	m	0.860717
chr10	75394738	75395722	CGI1736	47	0.585664	0.640306	784	5.9949	Mmp11	"NM_008606"	exon	0.00998616	0.00752224	0.00410354	0.00408163	0.00212766	0	m	0.875153	m	1	m	0.684425
chr10	75398292	75399285	CGI1737	50	0.610686	0.643127	793	6.30517	Chchd10	"NM_175329"	exon	0.0047619	0.00674836	0.00706845	0.0131223	0.00896921	0.00615454	f	0.658785	f	0.880787	m	0.658545
chr10	75413226	75414174	CGI1738	35	0.504407	0.610963	748	4.67914			intergenic	0.00755149	0.0106782	0.00550189	0.0112637	0.00833333	0.0128412	f	0.884581	f	0.927599	f	0.642306
chr10	75417039	75417586	CGI1739	19	0.613363	0.599424	347	5.4755	Gm5134	"NM_198635"	exon	0.0341559	0.0342796	0.0218615	0.0034965	0	0.0138799	f	0.93428	m	0.6724	f	0.354356
chr10	75495028	75495903	CGI1740	57	0.720468	0.685926	675	8.44444	Zfp280b	"NM_177475"	exon	0.00335283	0.0111751	0.00595674	0.00484569	0.00755947	0.00234192	f	0.676611	m	0.78159	m	0.398013
chr10	75666309	75666811	CGI1741	12	0.466338	0.602649	302	3.97351			intergenic	0.0507273	0.0318695	0.00602176	0.0166289	0.00856264	0.00680272	m	0.912471	f	0.895631	m	0.650959
chr10	75700090	75701100	CGI1742	47	0.682795	0.590123	810	5.80247	Prmt2	"NM_001077638,NM_133182"	exon	0.0138718	0	0.00894444	0.0099893	0.00559109	0.00246914	m	0.13096	f	0.890774	m	0.558051
chr10	75807127	75808546	CGI1743	111	0.809929	0.671042	1219	9.10582	Dip2a	"NM_001081419"	exon	0.0104776	0.00681695	0.00556466	0.0103906	0.00776473	0.0143652	m	0.913689	f	0.953855	f	0.98028
chr10	75817466	75817928	CGI1744	14	0.590357	0.603053	262	5.34351	Pcnt	"NM_008787"	exon	0.148062	0.171046	0.00902778	0.00213675	0.321783	0.00462963	f	0.901461	m	0.893719	m	1.13808e-05
chr10	75904870	75906209	CGI1745	85	0.837251	0.603161	1139	7.46269	Pcnt	"NM_008787"	exon	0.00365452	0.00504935	0.00897567	0.00539569	0.00445357	0.00601626	f	0.885184	m	0.895631	f	0.882163
chr10	75931208	75931994	CGI1746	48	0.869901	0.619454	586	8.19113	Mcm3ap,Ybey	"NM_019434","NM_172550"	exon	0.00220459	0.00943705	0.0132402	0.00406108	0.00499797	0.00489672	f	0.708178	m	0.815328	m	0.62258
chr10	75993725	75994865	CGI1747	65	0.66346	0.646809	940	6.91489	Lss	"NM_146006"	exon	0.00557348	0.00408497	0.00380291	0.00361281	0.00210284	0.00562061	m	1	m	0.929423	f	1
chr10	76032245	76032999	CGI1748	27	0.577347	0.584838	554	4.87365	1700027D21Rik	"NM_029661"	exon	0.165216	0.156876	0.027386	0.0233739	0.0061828	0.0111116	m	1	m	0.947721	f	0.642306
chr10	76058827	76059650	CGI1749	42	0.707294	0.617978	623	6.74157	Col6a2	"NM_146007"	exon	0.289735	0.228387	0.0315092	0.0188789	0.0515947	0.00555556	m	0.446936	m	0.440017	m	0.000887624
chr10	76085911	76086435	CGI1750	25	0.68112	0.709877	324	7.71605	Col6a2	"NM_146007"	exon	0.00869963	0.00617284	0.00931831	0.00434783	0.0144781	0.00226244	m	0.905517	m	0.828273	m	0.642306
chr10	76185987	76186471	CGI1751	16	0.645169	0.59507	284	5.6338	Col6a1	"NM_009933"	exon	0.180734	0.258545	0.0379648	0.0113757	0.0156822	0	f	0.55207	m	0.42587	m	0.25649
chr10	76423905	76425379	CGI1752	90	0.649903	0.660911	1274	7.06436	Pcbp3	"NM_021568"	exon	0.00538721	0.0139718	0.00602279	0.0149174	0.0116107	0	f	0.712511	f	0.388004	m	0.085188
chr10	76495111	76496671	CGI1753	81	0.675215	0.602206	1360	5.95588	Slc19a1	"NM_001199271,NM_031196"	exon	0.00528552	0.00592215	0.00507008	0.00635668	0.0066053	0.00453763	f	1	f	0.935908	m	0.642306
chr10	76628083	76629553	CGI1754	78	0.624334	0.627559	1270	6.14173	Col18a1	"NM_009929"	exon	0.00622316	0.0219484	0.00567213	0.00370885	0.00176156	0.00147059	f	0.141949	m	0.78159	m	0.807391
chr10	76721369	76722794	CGI1755	103	0.826254	0.638367	1225	8.40816	Gm10941,Pofut2	"NR_026944","NM_030262"	exon	0.00831094	0.00562489	0.00609307	0.00681199	0.00513302	0.00123016	m	0.839173	f	0.86425	m	0.36253
chr10	76879424	76881634	CGI1756	166	0.759472	0.664179	2010	8.25871	Adarb1,Gm17769	"NR_004429,NR_021486,NM_130895,NM_001024837","NR_027377"	exon	0.0143092	0.00854761	0.00716311	0.0096697	0.0058827	0.00896971	m	0.569926	f	0.78159	f	0.893413
chr10	76977815	76979094	CGI1757	80	0.810644	0.60519	1079	7.41427	1810008A18Rik	"NM_133998"	exon	0.00595207	0.00934862	0.00832582	0.00950321	0.00677742	0.000892857	f	0.89279	f	0.798279	m	0.273458
chr10	76985051	76985521	CGI1758	11	0.451673	0.603704	270	4.07407			intergenic	0.0078125	0.00520833	0.0173993	0.00833333	0.00714286	0	m	1	m	0.895631	m	0.480598
chr10	77043967	77045102	CGI1759	68	0.770558	0.614973	935	7.27273	Pttg1ip	"NM_145925"	exon	0.00945109	0.00434455	0.0105532	0.0149061	0.0050592	0.00316673	m	0.740957	f	0.830009	m	1
chr10	77068175	77069917	CGI1760	125	0.805432	0.636187	1542	8.10636	Sumo3	"NM_019929"	exon	0.0228553	0.0117221	0.00718235	0.00842206	0.0127753	0.00659319	m	0.357933	f	0.915811	m	0.781488
chr10	77084540	77085757	CGI1761	101	0.975967	0.640118	1017	9.93117	Ube2g2	"NM_019803"	exon	0.0122374	0.00732014	0.0104318	0.00632496	0.00760581	0.00590202	m	0.70239	m	0.895631	m	0.886064
chr10	77126509	77127540	CGI1762	48	0.650382	0.596871	831	5.77617			intergenic	0.0852528	0.0613386	0.00149313	0.0101703	0.0361535	0.00217865	m	0.884367	f	0.72289	m	0.0015314
chr10	77140048	77140978	CGI1763	43	0.622671	0.616438	730	5.89041			intergenic	0.0122889	0.0111573	0.00309829	0.0037037	0.00138889	0.00185185	m	0.955548	f	0.8981	f	1
chr10	77327314	77327760	CGI1764	13	0.54195	0.626016	246	5.28455			intergenic	0.0442177	0.0665882	0.00549451	0	0.0237528	0	f	0.903753	m	0.78159	m	0.25271
chr10	77364562	77366268	CGI1765	87	0.58988	0.636786	1506	5.77689	Lrrc3	"NM_145152"	exon	0.0106741	0.0105163	0.0140692	0.00648561	0.0111846	0.00858955	m	1	m	0.805549	m	0.667115
chr10	77432299	77432981	CGI1766	27	0.626221	0.609959	482	5.60166	Trpm2	"NM_138301"	exon	0.00909091	0.00687831	0.0117311	0.00324162	0.00134409	0	m	0.94096	m	0.68664	m	0.642306
chr10	77440678	77441809	CGI1767	66	0.714991	0.630505	931	7.08915	1810043G02Rik	"NM_026431"	exon	0.00864428	0.0110963	0.00404202	0.00904957	0.00273752	0.0036807	f	1	f	0.78159	f	0.859938
chr10	77471642	77472858	CGI1768	67	0.657738	0.636811	1016	6.59449	Pfkl	"NM_008826"	exon	0.0137152	0.0115782	0.00783874	0.00287555	0.00732928	0.00573671	m	0.915721	m	0.6724	m	0.594083
chr10	77481452	77481980	CGI1769	19	0.75314	0.557927	328	5.79268			intergenic	0.132397	0.0701393	0.030716	0.0216816	0.0459584	0.0242553	m	0.545199	m	0.85747	m	0.644608
chr10	77497023	77497654	CGI1770	30	0.649628	0.656613	431	6.96056	Aire	"NM_001271549,NM_001271550,NM_001271551,NM_001271552,NM_001271553,NM_001271554,NM_001271555,NM_001271556,NM_001271557,NM_001271558,NM_001271559,NM_009646,NR_073358"	exon	0.131109	0.134747	0.012606	0.0270311	0.0178721	0.00644353	f	0.911846	f	0.690245	m	0.487789
chr10	77505954	77506648	CGI1771	30	0.661443	0.607287	494	6.07287	Aire,Dnmt3l	"NM_001271549,NM_001271550,NM_001271551,NM_001271552,NM_001271553,NM_001271554,NM_001271555,NM_001271556,NM_001271557,NM_001271558,NM_001271559,NM_009646,NR_073358","NM_001081695"	exon	0.0227391	0.025765	0.00970472	0	0.0114764	0	f	0.946333	m	0.500399	m	0.480598
chr10	77531740	77532972	CGI1772	70	0.670904	0.636628	1032	6.78295	Icosl	"NM_015790"	exon	0.0106811	0.00947059	0.00662939	0.00648148	0.00921362	0.00884431	m	0.851962	m	0.969768	m	1
chr10	77627468	77627880	CGI1773	10	0.498257	0.622642	212	4.71698	D10Jhu81e	"NM_138601"	exon	0.223202	0.0821759	0.0101852	0.0466104	0.452218	0	m	0.391749	f	0.38075	m	0.00044028
chr10	77631934	77633088	CGI1774	59	0.666167	0.610063	954	6.18449	D10Jhu81e	"NM_138601"	exon	0.0152801	0.0126332	0.00610022	0.00859909	0.0026455	0.00176367	m	1	f	0.867935	m	1
chr10	77647508	77648285	CGI1775	43	0.874651	0.589255	577	7.45234	Pwp2	"NM_029546"	exon	0.0112436	0.0147514	0.0148053	0.00208333	0	0.00869565	f	0.97198	m	0.526411	f	0.642306
chr10	77706528	77708184	CGI1776	114	0.78559	0.631868	1456	7.82967	Trappc10	"NM_001081055"	exon	0.00193566	0.00737149	0.0138448	0.00430536	0.00337358	0.00445578	f	0.794615	m	0.463574	f	0.963757
chr10	77814284	77815918	CGI1777	133	0.790536	0.690377	1434	9.27476	Agpat3	"NM_053014"	exon	0.00701947	0.00703664	0.00917049	0.00436901	0.0053011	0.0110304	f	0.951724	m	0.78159	f	0.996307
chr10	77835739	77836149	CGI1778	10	0.76451	0.504762	210	4.7619			intergenic	0.0999947	0.14927	0.00992647	0.0206356	0.171502	0	f	0.76256	f	0.804349	m	0.000300105
chr10	77854680	77855163	CGI1779	15	0.700206	0.551237	283	5.30035			intergenic	0.0178571	0.00326797	0	0.00694444	0.00588235	0	m	0.888775	f	0.6724	m	0.642306
chr10	77874964	77876244	CGI1780	75	0.789513	0.593519	1080	6.94444	Rrp1	"NM_010925"	exon	0.0207512	0.00594673	0.00144349	0.00472196	0.00283581	0.00913249	m	0.756247	f	0.757679	f	0.627615
chr10	77888110	77888884	CGI1781	36	0.592565	0.651568	574	6.27178	Cstb	"NM_007793"	exon	0.0157985	0.00747107	0.0128225	0.00155039	0.00406977	0.00266106	m	0.454489	m	0.446108	m	1
chr10	77927025	77928239	CGI1782	68	0.678857	0.631164	1014	6.70611	Pdxk	"NM_172134"	exon	0.00789292	0.00864546	0.00552264	0.00637015	0.00538761	0.00640432	f	0.903753	f	0.936219	f	0.888572
chr10	77944334	77945331	CGI1783	43	0.587841	0.609787	797	5.39523			intergenic	0.00993464	0.00574371	0.00419577	0.00519763	0.00494134	0.0025	m	0.861237	f	1	m	0.480598
chr10	77950213	77950830	CGI1784	22	0.536651	0.628297	417	5.27578			intergenic	0.00845309	0.00966021	0	0.0110577	0.00570583	0	f	1	f	0.6724	m	0.480598
chr10	78036829	78038037	CGI1785	60	0.730842	0.582341	1008	5.95238	Ilvbl	"NM_173751"	exon	0.00276575	0.0119515	0.00396825	0.0108194	0.00550498	0.00146628	f	0.545199	f	0.78159	m	0.391845
chr10	78054135	78054979	CGI1786	46	0.678375	0.65528	644	7.14286	Syde1	"NM_027875"	exon	0.0219941	0	0.00488215	0	0.0284704	0	m	0.372989	m	0.632915	m	0.058825
chr10	78209600	78210187	CGI1787	21	0.671949	0.586563	387	5.42636	Ccdc105	"NM_027630"	exon	0.016226	0.015625	0.00297619	0.00595238	0	0	m	0.734007	f	1	-	NA
chr10	78214921	78216008	CGI1788	68	0.750756	0.640361	887	7.66629	Ccdc105	"NM_027630"	exon	0.00743349	0.0086133	0.00335345	0.00299192	0.0061197	0.00696248	f	1	m	1	f	0.891769
chr10	78242563	78243651	CGI1789	64	0.667301	0.657658	888	7.20721	Slc1a6	"NM_009200"	exon	0.0106294	0.0133506	0.00201776	0.0114638	0.00316047	0.00434783	f	0.87056	f	0.83006	f	0.852576
chr10	78250376	78250880	CGI1790	18	0.614926	0.621711	304	5.92105	Slc1a6	"NM_009200"	exon	0.0292327	0.00396825	0.00547175	0.00207039	0.00630851	0.00750361	m	0.341599	m	0.895631	f	1
chr10	78559970	78560577	CGI1791	28	0.708338	0.624079	407	6.87961	2610008E11Rik	"NM_001004362"	exon	0.0542514	0	0.00880125	0.00514953	0.00623886	0.0138783	m	0.0757699	m	0.923412	f	0.673362
chr10	78995762	78996876	CGI1792	57	0.580016	0.657549	914	6.23632	Ppap2c	"NM_015817"	exon	0.00454076	0.00320261	0.0142219	0.0127427	0.00943974	0.0167692	m	1	m	0.957857	f	0.627505
chr10	79016918	79018581	CGI1793	116	0.727563	0.661654	1463	7.92891	Mier2	"NM_027422"	exon	0.00835514	0.00503641	0.00445305	0.00777585	0.00237358	0.000841751	m	0.831647	f	0.895631	m	0.791586
chr10	79074837	79075927	CGI1794	50	0.520749	0.657303	890	5.61798	C2cd4c	"NM_198614,NM_001168624"	exon	0.0192722	0.0295021	0.000826446	0.00477728	0.0126095	0.0020202	f	0.545199	f	0.597819	m	0.223945
chr10	79076101	79077246	CGI1795	61	0.596636	0.660317	945	6.45503	C2cd4c	"NM_198614,NM_001168624"	exon	0.00881931	0.00448064	0.00493386	0.00243506	0.0083089	0	m	0.685795	m	0.779928	m	0.184705
chr10	79099601	79101269	CGI1796	123	0.783824	0.655313	1468	8.37875	Shc2	"NM_001024539"	exon	0.00570079	0.00957377	0.0121515	0.0077918	0.00388538	0.001982	f	0.822957	m	0.529892	m	0.68524
chr10	79101549	79101993	CGI1797	14	0.55395	0.647541	244	5.7377			intergenic	0	0.00705467	0.00505051	0.017284	0.0228582	0.0151727	f	0.658785	f	0.893719	m	0.716067
chr10	79131632	79133237	CGI1798	96	0.763491	0.600712	1405	6.83274	Gm16517	"NM_148934"	exon	0.0059696	0.0089448	0.0049238	0.00578043	0.00359986	0.00452295	f	0.794615	f	1	f	0.878615
chr10	79138023	79138717	CGI1799	39	0.718248	0.665992	494	7.89474	Gm16517	"NM_148934"	exon	0.0620762	0.0620203	0.0136176	0.00959302	0.00904558	0.00775194	m	0.951314	m	0.529328	m	0.259649
chr10	79143918	79145701	CGI1800	139	0.807393	0.660139	1583	8.7808	Cdc34	"NM_177613"	exon	0.0051878	0.00825953	0.0102815	0.00616891	0.00278242	0.00434783	f	0.9122	m	0.791816	f	0.597526
chr10	79166661	79168137	CGI1801	75	0.668465	0.608934	1276	5.87774	Bsg	"NM_009768,NM_001077184"	exon	0.00718633	0.00460846	0.0101793	0.00668227	0.00273632	0.0103537	m	0.847526	m	0.78159	f	0.582437
chr10	79171416	79171878	CGI1802	15	0.574746	0.633588	262	5.72519	Bsg	"NM_009768,NM_001077184"	exon	0.12075	0.136792	0.0313891	0.00189394	0.305174	0	f	0.789675	m	0.122569	m	1.6384e-06
chr10	79178828	79181238	CGI1803	198	0.79956	0.671946	2210	8.95928	Hcn2	"NM_008226"	exon	0.00884778	0.0118374	0.012579	0.00855599	0.00985036	0.00270871	f	0.876319	m	0.78159	m	0.566502
chr10	79191541	79191904	CGI1804	13	0.870948	0.607362	163	7.97546	Hcn2	"NM_008226"	exon	0.0911093	0.0849165	0.0103099	0.00986842	0.0526942	0	m	0.905913	m	0.861809	m	0.0333527
chr10	79197351	79199661	CGI1805	154	0.691872	0.650711	2110	7.29858	Hcn2,Polrmt	"NM_008226","NM_172551"	exon	0.0599346	0.0704364	0.0196769	0.0113023	0.0156546	0.00604671	f	0.94919	m	0.38981	m	0.358966
chr10	79200636	79201039	CGI1806	11	0.5644	0.625616	203	5.41872	Polrmt	"NM_172551"	exon	0.201736	0.191918	0.0177887	0	0.0200847	0.00787879	m	0.894333	m	0.218239	m	0.389053
chr10	79208938	79209610	CGI1807	33	0.819804	0.584746	472	6.99153	Polrmt	"NM_172551"	exon	0.0119288	0.01555	0.00185185	0.00132275	0.00698045	0.00277778	f	1	m	1	m	0.480598
chr10	79217606	79218352	CGI1808	35	0.616747	0.64652	546	6.41026	Fgf22	"NM_023304"	exon	0.00138889	0.00551146	0.00604575	0.00185185	0.00610501	0.00277778	f	0.893004	m	0.78159	m	0.806753
chr10	79228680	79230721	CGI1809	151	0.799146	0.644215	1841	8.20206	Rnf126	"NR_027505,NM_144528"	exon	0.00814149	0.00646587	0.00596558	0.00487415	0.0134624	0.00990982	m	0.995941	m	0.920466	m	0.949647
chr10	79239464	79240444	CGI1810	43	0.561777	0.626923	780	5.51282	Fstl3	"NM_031380"	exon	0.0108026	0.0166537	0.012448	0.00416667	0.0078125	0.00258398	f	0.939716	m	0.696214	m	0.954119
chr10	79242436	79244250	CGI1811	88	0.587331	0.620818	1614	5.45229	Fstl3,Prss57	"NM_031380","NM_001042710"	exon	0.0152831	0.00706523	0.0105472	0.00576475	0.0116547	0.00070028	m	0.545714	m	0.6724	m	0.205948
chr10	79246985	79247526	CGI1812	18	0.61499	0.589443	341	5.27859	Prss57	"NM_001042710"	exon	0.0478832	0.0509639	0.0191277	0.00763126	0.0102381	0	f	0.939058	m	0.807305	m	0.257281
chr10	79255698	79257028	CGI1813	80	0.675931	0.648673	1130	7.07965	Palm	"NM_023128,NM_001161747"	exon	0.013249	0.0066351	0.0122081	0.00789826	0.00973214	0.0040625	m	0.642002	m	0.737104	m	0.480598
chr10	79266374	79266973	CGI1814	24	0.588852	0.641604	399	6.01504	Palm	"NM_023128,NM_001161747"	intron	0.0476871	0.0484782	0.0121353	0	0.013244	0.00492611	f	0.895042	m	0.500399	m	0.490223
chr10	79316549	79318628	CGI1815	160	0.903928	0.615753	1879	8.51517	E130317F20Rik,Ptbp1	"NR_029447","NM_008956,NM_001077363"	exon	0.00871597	0.00508057	0.00705821	0.00805927	0.00679701	0.00192044	m	0.894333	f	0.902643	m	0.354356
chr10	79328543	79329022	CGI1816	12	0.449204	0.620072	279	4.30108	BC005764	"NM_001170935,NR_033210,NM_181681"	exon	0.0686544	0.0704384	0.0126794	0.00239234	0.089124	0.00526316	f	0.820447	m	0.78159	m	0.00192552
chr10	79336539	79337837	CGI1817	80	0.695989	0.647541	1098	7.28597	BC005764	"NM_001170935,NR_033210,NM_181681"	exon	0.0126893	0.00931647	0.00343689	0.007843	0.00690789	0.00280646	m	1	f	0.58402	m	0.713221
chr10	79344541	79345184	CGI1818	26	0.584095	0.641084	443	5.86907	Prtn3	"NM_011178"	exon	0.0438046	0.0143189	0	0.00324675	0.0116758	0.00255102	m	0.416164	f	0.78159	m	0.792182
chr10	79371068	79371848	CGI1819	42	0.860349	0.627586	580	7.24138	Med16	"NM_198107,NM_001163276"	exon	0.0131175	0.00457977	0.00181159	0.0150319	0.00350168	0.0138605	m	0.815298	f	0.446108	f	0.494367
chr10	79379299	79380103	CGI1820	41	0.599895	0.678808	604	6.78808	C030046I01Rik,Kiss1r	"NM_177994","NM_053244"	exon	0.00198413	0.00487005	0.00782744	0.00974361	0.0137657	0.00384615	f	0.678686	f	0.895631	m	0.642306
chr10	79381066	79381794	CGI1821	28	0.546066	0.625	528	5.30303	Kiss1r	"NM_053244"	exon	0.0250814	0.00646412	0.00121212	0.0137749	0.0527287	0.00836217	m	0.547896	f	0.595596	m	0.0893548
chr10	79383024	79384896	CGI1822	104	0.625308	0.630981	1672	6.2201	Kiss1r	"NM_053244"	exon	0.0122719	0.018295	0.0109376	0.00596864	0.00841843	0.00447036	f	0.747532	m	0.78159	m	0.634051
chr10	79387999	79388440	CGI1823	16	0.803667	0.576763	241	6.639			intergenic	0.00596491	0.0115385	0.00986622	0.00442308	0.0075	0	f	1	m	1	m	0.480598
chr10	79388920	79391153	CGI1824	144	0.743889	0.617314	2033	7.08313	Arid3a	"NM_007880"	exon	0.00468539	0.00929281	0.00648774	0.00281726	0.00512302	0.00631591	f	0.680908	m	0.58402	f	0.944084
chr10	79399595	79400431	CGI1825	31	0.44782	0.660377	636	4.87421	Arid3a	"NM_007880"	intron	0.152378	0.130696	0.0414014	0	0.383995	0.00190476	m	0.660237	m	0.0272733	m	8.14907e-11
chr10	79420897	79421395	CGI1826	14	0.539996	0.610738	298	4.69799			intergenic	0.00630252	0.0030303	0	0	0.0721732	0	m	0.898846	-	NA	m	0.0271919
chr10	79422475	79423645	CGI1827	69	0.794741	0.602062	970	7.1134	Wdr18	"NM_175450"	exon	0.00817657	0.00590793	0.00359043	0.00255172	0.00446264	0.0112391	m	0.769172	m	0.858189	f	0.955577
chr10	79433292	79434568	CGI1828	63	0.590276	0.6329	1076	5.85502	Grin3b	"NM_130455"	exon	0.00749766	0.00910218	0.00819597	0	0.00333333	0.00360963	f	1	m	0.58402	f	0.95617
chr10	79438223	79440608	CGI1829	145	0.626603	0.651716	2185	6.63616	Grin3b,ORF61	"NM_130455","NM_001003949"	exon	0.0668322	0.114249	0.0198133	0.0110235	0.020145	0.00893052	f	0.187741	m	0.456541	m	0.127262
chr10	79446259	79448099	CGI1830	119	0.813212	0.60122	1640	7.2561	ORF61	"NM_001003949"	exon	0.00654278	0.00592287	0.0131473	0.00632075	0.00714541	0.00330132	m	0.898371	m	0.726775	m	0.334709
chr10	79448345	79448741	CGI1831	9	0.716382	0.510204	196	4.59184			intergenic	0.00892857	0.00347222	0.0189904	0	0	0.0137821	m	1	m	0.500399	f	0.480598
chr10	79451005	79452174	CGI1832	75	0.738047	0.648091	969	7.73994	Cnn2	"NM_007725"	exon	0.0162975	0.00553392	0.0030464	0.00466569	0.00839946	0.00118064	m	0.5174	f	1	m	0.163984
chr10	79453539	79454179	CGI1833	19	0.461376	0.613636	440	4.31818	Cnn2	"NM_007725"	exon	0.0864766	0.154343	0.00776398	0.0106415	0.010766	0.0030303	f	0.628922	f	0.929919	m	0.510794
chr10	79459029	79459608	CGI1834	21	0.604916	0.614776	379	5.5409			intergenic	0.0015528	0.00822368	0.00807823	0.0116758	0.00246914	0	f	0.892086	f	0.922966	m	0.642306
chr10	79459868	79460736	CGI1835	31	0.555307	0.580838	668	4.64072	Abca7	"NM_013850"	exon	0.00716374	0	0.0118108	0.00394737	0.0076952	0.0040404	m	0.433006	m	0.797403	m	0.846909
chr10	79465268	79465855	CGI1836	21	0.632613	0.586563	387	5.42636	Abca7	"NM_013850"	exon	0.00907148	0.03387	0.0109647	0.0138149	0.0423409	0.00285714	f	0.224676	f	1	m	0.0172243
chr10	79476436	79477541	CGI1837	43	0.522969	0.60884	905	4.75138	Abca7	"NM_013850"	exon	0.0120903	0.0203398	0.00978823	0.00613105	0.0226276	0.007945	f	0.92614	m	0.78159	m	0.212669
chr10	79488737	79489265	CGI1838	15	0.541123	0.582317	328	4.57317	Hmha1	"NM_027521,NM_001142701"	exon	0.130357	0.200508	0.00164474	0.0128655	0.0144725	0.0116959	f	0.674391	f	0.78159	m	0.811657
chr10	79501930	79502916	CGI1839	59	0.837537	0.600509	786	7.50636	Polr2e	"NM_025554"	exon	0.0073226	0.00633679	0.00870556	0.00717213	0.00235393	0.00956639	m	0.951283	m	0.78159	f	0.582437
chr10	79515895	79517716	CGI1840	126	0.789273	0.628007	1621	7.77298	Gpx4	"NM_008162,NM_001037741"	exon	0.00837424	0.00942464	0.00702363	0.00301418	0.00518118	0.00424322	f	0.958321	m	0.38981	m	0.594955
chr10	79537730	79538313	CGI1841	20	0.508748	0.644909	383	5.22193	Sbno2	"NM_183426"	intron	0.00900324	0.0283466	0.0104894	0.00761317	0.218347	0.00617284	f	0.902406	m	1	m	1.49979e-06
chr10	79564830	79565802	CGI1842	63	0.742568	0.664508	772	8.16062	Sbno2	"NM_183426"	exon	0.00589744	0.00730581	0.0109005	0.00184462	0	0.00512583	f	0.900694	m	0.58402	f	0.266772
chr10	79577397	79580318	CGI1843	221	0.89281	0.603455	2721	8.12201	Stk11	"NM_011492"	exon	0.00824505	0.00679964	0.0056626	0.00498717	0.0090906	0.0046706	m	0.962328	m	0.82226	m	0.377873
chr10	79593868	79595075	CGI1844	80	0.753758	0.650447	1007	7.94439	Dos	"NR_036582,NM_001195268"	exon	0.0312493	0.0292818	0.00781281	0.0035718	0.0127164	0.00501277	m	1	m	0.6724	m	0.278676
chr10	79599013	79599571	CGI1845	32	0.750856	0.703911	358	8.93855	Dos	"NR_036582,NM_001195268"	exon	0.0455185	0.0240345	0.00520833	0	0.00909091	0.00322581	m	0.9479	m	0.6724	m	0.921519
chr10	79599618	79600350	CGI1846	26	0.477041	0.640977	532	4.88722	Dos	"NR_036582,NM_001195268"	exon	0.00336617	0.0181731	0.0066092	0.00823375	0.00720165	0.00446429	f	0.678951	f	0.922966	m	0.808389
chr10	79600919	79602653	CGI1847	114	0.727398	0.639505	1534	7.43155	Dos	"NR_036582"	exon	0.00926563	0.00715488	0.00499933	0.0050176	0.004978	0.00386343	m	0.795576	f	0.822135	m	0.848363
chr10	79603884	79604540	CGI1848	30	0.725938	0.60307	456	6.57895			intergenic	0.00606061	0.00504202	0.0153252	0.00896359	0.00784314	0.00787037	m	0.92614	m	0.858145	f	1
chr10	79604807	79605543	CGI1849	43	0.877321	0.61194	536	8.02239	Atp5d	"NM_025313"	exon	0.0131752	0.00594487	0.00305135	0.0103011	0	0.00629209	m	0.91392	f	0.6724	f	0.354356
chr10	79610583	79614335	CGI1850	268	0.680519	0.666104	3552	7.54505	Midn	"NM_021565"	exon	0.00891317	0.00746926	0.00434585	0.00476725	0.012671	0.00475524	m	0.794615	f	0.734518	m	0.0697229
chr10	79622260	79623245	CGI1851	53	0.69517	0.624204	785	6.75159			intergenic	0.0111337	0.0114087	0.00137363	0	0.00550735	0.00913621	f	0.949696	m	0.78159	f	0.986779
chr10	79623764	79624267	CGI1852	17	0.473525	0.689769	303	5.61056			intergenic	0.00877193	0.00697168	0.0124831	0.00309598	0.0149082	0.00854701	m	1	m	0.78159	m	0.771563
chr10	79627134	79628172	CGI1853	53	0.638051	0.630072	838	6.32458			intergenic	0.0134965	0.00536886	0	0.00536732	0.0112906	0	m	0.791934	f	0.544649	m	0.182469
chr10	79630096	79631394	CGI1854	99	0.943471	0.621129	1098	9.01639	Cirbp	"NM_007705"	exon	0.00709798	0.0047995	0.0106702	0.00211611	0.00556687	0.00746714	m	0.798412	m	0.58402	f	0.692671
chr10	79635474	79636291	CGI1855	35	0.694785	0.572123	617	5.67261	1600002K03Rik	"NM_027207"	exon	0.00921069	0.00636956	0.00514444	0.00560777	0.015391	0.00833333	m	0.997855	f	0.943459	m	0.69573
chr10	79641490	79643473	CGI1856	119	0.641397	0.645541	1783	6.67414	Efna2	"NM_007909"	exon	0.0186913	0.0128809	0.0117972	0.00853478	0.0097405	0.00679678	m	0.855925	m	1	m	0.480598
chr10	79649288	79649887	CGI1857	27	0.665029	0.641604	399	6.76692	Efna2	"NM_007909"	exon	0.0185793	0.0306144	0	0.00424208	0.0246458	0.00555556	f	0.919537	f	0.6724	m	0.180038
chr10	79652694	79654148	CGI1858	90	0.688766	0.645933	1254	7.17703	Efna2	"NM_007909"	exon	0.00736743	0.0088759	0.00601307	0.00785736	0.00652937	0.00970696	f	1	f	0.80877	f	0.964749
chr10	79671499	79671986	CGI1859	22	0.837219	0.606272	287	7.66551			intergenic	0.0101118	0.023656	0.00845242	0.00410526	0.00901961	0.02	f	0.867749	m	0.908008	f	1
chr10	79688841	79689962	CGI1860	85	0.77026	0.697068	921	9.2291	Mum1	"NM_023431"	exon	0.00559736	0.00588552	0.00623275	0.0037238	0.00834852	0.00596546	f	0.94603	m	0.885463	m	0.680214
chr10	79711599	79712590	CGI1861	58	0.974254	0.549937	791	7.33249	Ndufs7	"NM_029272"	exon	0.00569743	0.00809113	0.00276442	0.00423689	0.0031901	0.00104167	f	1	f	0.829875	m	0.496377
chr10	79723095	79724382	CGI1862	56	0.550319	0.620975	1087	5.15179	Gamt	"NM_010255"	exon	0.0151145	0.0105356	0.00351342	0.00669332	0.00692984	0.0020202	m	0.895042	f	0.927131	m	0.566204
chr10	79727165	79728214	CGI1863	97	0.996328	0.681979	849	11.4252	Dazap1	"NM_001122605,NM_001122604,NM_133188"	exon	0.00983515	0.00957038	0.0033996	0.00699364	0.0035709	0.0036239	m	1	f	0.885402	f	1
chr10	79754765	79755873	CGI1864	70	0.843576	0.605727	908	7.70925	Rps15	"NM_009091"	exon	0.00942145	0.00688381	0.0130051	0.00493421	0.00947311	0.00655424	m	0.854672	m	0.500399	m	1
chr10	79758538	79759152	CGI1865	19	0.46079	0.63285	414	4.58937			intergenic	0.00939951	0.00662393	0.00454545	0	0.0125	0.0138889	m	0.919537	m	0.78159	f	0.687702
chr10	79761571	79762248	CGI1866	33	0.619101	0.67086	477	6.91824			intergenic	0.0045695	0.00482253	0.00173611	0.00815697	0	0.00694444	f	0.930839	f	0.78159	f	0.480598
chr10	79767321	79768041	CGI1867	31	0.658931	0.615385	520	5.96154	Apc2	"NM_011789"	exon	0.00770914	0.0139425	0.00743845	0.00393798	0	0	f	0.950252	m	0.832148	-	NA
chr10	79774481	79776198	CGI1868	85	0.544045	0.642057	1517	5.60316	Apc2	"NM_011789"	exon	0.0813301	0.082304	0.0276061	0.0148444	0.0273731	0.0069171	f	1	m	0.556659	m	0.0261212
chr10	79777633	79778573	CGI1869	50	0.660464	0.645946	740	6.75676	Apc2	"NM_011789"	exon	0.0480075	0.0441049	0.0188885	0	0.0201588	0.00694444	m	1	m	0.0548237	m	0.293466
chr10	79782763	79783666	CGI1870	53	0.855625	0.598862	703	7.53912	2310011J03Rik	"NM_025521"	exon	0.00625224	0.00481859	0.00354199	0.0103181	0.00198413	0.00884844	m	0.932492	f	0.817892	f	0.380957
chr10	79785425	79786868	CGI1871	76	0.571125	0.660499	1243	6.11424	Pcsk4	"NM_008793"	exon	0.0167811	0.00841226	0.00589479	0.00886606	0.00485589	0.00260417	m	0.794615	f	1	m	0.711605
chr10	79792257	79793559	CGI1872	67	0.640701	0.61706	1102	6.07985	Reep6	"NM_139292,NM_001204931"	exon	0.0116856	0.00534188	0.0131803	0.00617284	0.0010929	0	m	0.871167	m	0.895631	m	0.642306
chr10	79803836	79805993	CGI1873	120	0.607151	0.641799	1957	6.13183	Adamtsl5	"NM_001113548,NM_025629"	exon	0.0140672	0.0154959	0.00929796	0.00363732	0.00631721	0.00160713	f	0.802521	m	0.723479	m	0.176503
chr10	79810690	79812264	CGI1874	82	0.573853	0.652111	1374	5.96798	Adamtsl5	"NM_025629,NM_001113548"	exon	0.018133	0.0171057	0.00752493	0.00698826	0.00802237	0.00922565	m	0.78513	m	0.962413	f	0.82781
chr10	79818518	79820095	CGI1875	101	0.712408	0.641975	1377	7.33479	Plk5	"NM_183152"	exon	0.00939367	0.00810445	0.00671773	0.00652882	0.00511391	0.00525599	m	0.955548	m	0.904947	f	0.822148
chr10	79820450	79821290	CGI1876	34	0.558321	0.61875	640	5.3125	Plk5	"NM_183152"	exon	0.0139213	0.0188669	0	0.0149409	0.0042328	0.0030303	f	0.782208	f	0.333667	m	0.744332
chr10	79848910	79851342	CGI1877	204	0.780636	0.685932	2232	9.13978	Mex3d	"NM_198615"	exon	0.00554075	0.0112367	0.00677366	0.00552971	0.00329869	0.00717595	f	0.861664	m	0.982357	f	0.590382
chr10	79861266	79863078	CGI1878	156	0.902543	0.66005	1612	9.67742	Mbd3	"NM_013595"	exon	0.00523346	0.00717293	0.00969746	0.0120651	0.00565039	0.00278653	f	0.863713	f	0.90048	m	0.646894
chr10	79868884	79869872	CGI1879	41	0.662673	0.560914	788	5.20305	Uqcr11	"NM_025650"	exon	0.00816861	0.0101067	0.0107875	0.00387397	0.00277778	0.00193798	f	1	m	0.803722	m	0.818045
chr10	79875227	79876183	CGI1880	43	0.578881	0.634921	756	5.68783	Tcf3	"NM_001164147,NM_001164151,NM_001164152,NM_001164150,NM_001164148,NM_011548,NM_001164149,NM_001164153"	exon	0.189009	0.161813	0.00923733	0.0126196	0.067473	0.00116144	m	0.803575	f	0.893719	m	0.000221582
chr10	79895457	79897098	CGI1881	123	0.876142	0.625954	1441	8.53574	Tcf3	"NM_001164147,NM_001164151,NM_001164152,NM_001164150,NM_001164148,NM_011548,NM_001164149,NM_001164153"	exon	0.00600442	0.00860914	0.00740191	0.00994223	0.00230392	0.0184949	f	0.796155	f	0.928671	f	0.132734
chr10	79908922	79909569	CGI1882	24	0.740602	0.53915	447	5.36913			intergenic	0.0270637	0.00823045	0.00866047	0.00531632	0.00740741	0	m	0.643284	m	0.828175	m	0.642306
chr10	79934318	79935059	CGI1883	28	0.481688	0.656192	541	5.1756			intergenic	0.00860424	0.00208333	0	0.0151654	0	0.0063101	m	0.658785	f	0.58402	f	0.480598
chr10	79937513	79938807	CGI1884	75	0.653529	0.648995	1094	6.85558			intergenic	0.0190239	0.0176306	0.00711731	0.00960852	0.0108092	0.0081124	m	0.942095	f	0.895631	m	1
chr10	79952785	79954563	CGI1885	86	0.587098	0.609632	1578	5.44994			intergenic	0.00475873	0.00180109	0.00829575	0.00455538	0.00358692	0.00162338	m	0.787686	m	0.78159	m	0.423322
chr10	79957159	79959641	CGI1886	202	0.753355	0.685802	2282	8.85188	Onecut3	"NM_139226"	exon	0.0141991	0.0103834	0.00675431	0.00873305	0.00727436	0.00131579	m	0.794615	f	0.928828	m	0.324937
chr10	79965533	79965952	CGI1887	14	0.556974	0.680365	219	6.39269	Onecut3	"NM_139226"	intron	0.0137054	0.0120851	0.014245	0.01	0.00913328	0.003125	m	0.975488	m	0.902922	m	0.513593
chr10	79966174	79966643	CGI1888	19	0.854442	0.576208	269	7.0632	Onecut3	"NM_139226"	intron	0.00509259	0.00462963	0.00297619	0.0281626	0.0135281	0.0104167	m	0.905106	f	0.58402	m	0.844402
chr10	79976535	79977045	CGI1889	20	0.642569	0.63871	310	6.45161	Onecut3	"NM_139226"	exon	0.0143116	0.0401494	0	0.00289855	0.0798598	0.0113636	f	0.670859	f	0.78159	m	0.0416338
chr10	79989286	79989733	CGI1890	13	0.512568	0.643725	247	5.26316	Atp8b3	"NM_026094"	exon	0.234394	0.278535	0.0136842	0.0425645	0.035725	0.00444444	f	0.91343	f	0.58402	m	0.257705
chr10	79997966	79998391	CGI1891	15	0.805433	0.577778	225	6.66667	Atp8b3	"NM_026094"	exon	0.0333333	0.0216374	0.00478469	0.00854409	0.0327767	0	m	0.925429	f	0.90048	m	0.170364
chr10	79998882	79999401	CGI1892	8	0.310494	0.570533	319	2.50784	Atp8b3	"NM_026094"	exon	0.101029	0.0414631	0.0223214	0	0.0232955	0.00520833	m	0.727316	m	0.393882	m	0.782526
chr10	80001578	80002213	CGI1893	27	0.620497	0.662069	435	6.2069	Atp8b3	"NM_026094"	exon	0.00430108	0.00690131	0.0106036	0.00979991	0.00460829	0.00358423	f	0.794615	m	0.96208	m	1
chr10	80023377	80024791	CGI1894	92	0.831301	0.604613	1214	7.57825	Rexo1	"NM_025852"	exon	0.0114888	0.00566352	0.00875287	0.00634291	0.00893909	0.00865569	m	0.543461	m	0.915645	m	0.725961
chr10	80033782	80034304	CGI1895	14	0.471046	0.608696	322	4.34783	Klf16	"NM_078477"	intron	0	0	0.00940171	0	0.0172222	0	-	NA	m	0.6724	m	0.365558
chr10	80038553	80041537	CGI1896	242	0.802961	0.659124	2784	8.69253	Klf16	"NM_078477"	exon	0.00961436	0.00854853	0.010063	0.0085438	0.00259171	0.00189064	m	0.732121	m	1	m	1
chr10	80046537	80047115	CGI1897	20	0.599308	0.597884	378	5.29101	Fam108a	"NM_145421"	exon	0.185009	0.101281	0.0192727	0.0111656	0.0169935	0.00934829	m	0.373699	m	0.544649	m	0.86512
chr10	80049152	80050094	CGI1898	51	0.611179	0.671159	742	6.87332	Fam108a	"NM_145421"	exon	0.255835	0.324725	0.00365419	0.0218602	0.00321064	0.0134276	f	0.278793	f	0.239357	f	0.371011
chr10	80052375	80053547	CGI1899	74	0.72028	0.659465	972	7.61317	Fam108a	"NM_145421"	exon	0.00996253	0.00939878	0.000892857	0.00702315	0.00291923	0.00264837	m	0.909598	f	0.532027	m	0.879723
chr10	80065273	80066373	CGI1900	57	0.762653	0.576667	900	6.33333	Adat3,Scamp4	"NM_001100606","NM_019575"	exon	0.00726657	0.00872332	0.00965875	0.00184729	0.00348143	0.00295567	f	1	m	0.738319	m	1
chr10	80084517	80086525	CGI1901	158	0.885145	0.635509	1808	8.73894	Csnk1g2	"NM_134002"	exon	0.00924971	0.00322959	0.00993086	0.00367624	0.00969019	0.00672845	m	0.254542	m	0.16704	m	0.281849
chr10	80118286	80119920	CGI1902	89	0.690785	0.652022	1434	6.20642	Btbd2	"NM_145361"	exon	0.0134306	0.0150561	0.00993721	0.0072915	0.00609988	0.0102814	f	0.734007	m	0.6724	f	0.911523
chr10	80138091	80139993	CGI1903	141	0.772656	0.655112	1702	8.28437			intergenic	0.00624592	0.0145336	0.00459656	0.00652385	0.0030303	0.0114098	f	0.898371	f	0.928568	f	0.533554
chr10	80164222	80166027	CGI1904	104	0.669049	0.626168	1605	6.47975	Izumo4,Mob3a	"NM_027829","NM_172457"	exon	0.00202703	0.00502646	0.00463925	0.00728571	0.003228	0.00485909	f	0.689917	f	0.630778	f	0.966176
chr10	80204284	80205406	CGI1905	64	0.678825	0.639913	922	6.94143	Ap3d1	"NM_007460"	exon	0.00693816	0.00349037	0.00357659	0.00596788	0.00283178	0.00242424	m	0.791888	f	0.919107	m	0.690358
chr10	80217499	80219201	CGI1906	135	0.880527	0.641145	1502	8.98802	Dot1l	"NM_199322"	exon	0.00279269	0.00496032	0.00646559	0.00816058	0.0109549	0.00281836	f	0.895042	f	0.906199	m	0.0964032
chr10	80254417	80255564	CGI1907	55	0.530526	0.669483	947	5.80781	Dot1l	"NM_199322"	intron	0.0698167	0.0996239	0.00331909	0.00671797	0.0209532	0.00561002	f	0.646021	f	1	m	0.0733718
chr10	80260127	80262382	CGI1908	181	0.914384	0.620925	2055	8.80779	Plekhj1,Sf3a2	"NM_023900","NM_013651"	exon	0.00877385	0.00611031	0.00597729	0.00576261	0.00482047	0.00345126	m	0.883547	m	0.78159	m	0.826548
chr10	80269023	80270709	CGI1909	98	0.617441	0.656124	1486	6.59489	Amh	"NM_007445"	exon	0.0320932	0.0313562	0.00547231	0.00606861	0.00919568	0.00477035	m	0.855878	f	0.949825	m	0.354356
chr10	80270812	80272024	CGI1910	48	0.541784	0.593874	1012	4.74308	Jsrp1	"NM_028001"	exon	0.0155751	0.00835619	0.00598101	0.00546596	0.0061617	0.00940811	m	0.747532	m	0.895631	f	0.778149
chr10	80272804	80273425	CGI1911	23	0.518486	0.650831	421	5.46318	Jsrp1	"NM_028001"	exon	0.0389481	0.0192985	0.0106227	0.00911055	0.022955	0.00606061	m	0.878012	m	1	m	0.354356
chr10	80288841	80290535	CGI1912	109	0.901619	0.578983	1494	7.29585	Oaz1,Oaz1-ps	"NM_008753","NR_027656"	exon	0.00517376	0.00779915	0.0107144	0.00351733	0.00483259	0.00302619	f	0.930071	m	0.850103	m	0.918851
chr10	80296942	80299008	CGI1913	147	0.735099	0.656484	1866	7.87781	Lingo3	"NM_001013758"	exon	0.0695682	0.078859	0.0143749	0.0100854	0.0167055	0.00501358	f	0.697029	m	0.422514	m	0.0049682
chr10	80305961	80307322	CGI1914	79	0.61772	0.668389	1161	6.80448	Lingo3	"NM_001013758"	exon	0.0215512	0.0106776	0.0169765	0.00888986	0.00568673	0.0045082	m	0.758293	m	0.74637	m	0.852051
chr10	80317389	80318909	CGI1915	94	0.714104	0.640909	1320	7.12121	3110056O03Rik,Lsm7	"NM_175195","NM_025349"	exon	0.00942674	0.00571401	0.00865308	0.00421744	0.00510492	0.00860408	m	0.892063	m	0.6724	f	0.895394
chr10	80326836	80327533	CGI1916	21	0.449325	0.619718	497	4.22535	3110056O03Rik	"NM_175195"	exon	0.137884	0.102432	0.01213	0.0573667	0.293101	0.00308642	m	0.639686	f	0.665556	m	3.51234e-08
chr10	80350819	80351427	CGI1917	37	0.877993	0.644608	408	9.06863	Tmprss9	"NM_001081688"	exon	0.0420606	0.0404438	0.00474071	0.0112939	0.00389643	0.00245098	m	0.84096	f	0.817789	m	0.814564
chr10	80352799	80353275	CGI1918	16	0.529391	0.663043	276	5.7971	Tmprss9	"NM_001081688"	exon	0.0976177	0.0669459	0.011194	0.00752315	0.0447839	0	m	0.898371	m	0.844203	m	0.0383843
chr10	80359844	80360197	CGI1919	10	0.538485	0.712418	153	6.53595	Tmprss9	"NM_001081688"	exon	0.0507101	0.0916372	0.0121212	0	0.0149573	0	f	0.658785	m	0.6724	m	0.480598
chr10	80360374	80361111	CGI1920	37	0.650334	0.651769	537	6.89013	Tmprss9	"NM_001081688"	exon	0.0151973	0.00967938	0.0136667	0.00715995	0.00320513	0.00634921	m	0.877127	m	0.689422	f	0.811507
chr10	80362634	80364015	CGI1921	90	0.802832	0.622354	1181	7.62066	Timm13	"NM_013895"	exon	0.00730613	0.00586762	0.005302	0.00834165	0.00627717	0.00151976	m	0.918629	f	1	m	0.386448
chr10	80380173	80381425	CGI1922	73	0.757913	0.605513	1052	6.93916	Lmnb2	"NM_010722"	exon	0.00949416	0.0190948	0.013446	0.00532246	0.00610501	0.00534816	f	0.947866	m	0.776718	m	1
chr10	80391255	80394089	CGI1923	162	0.706739	0.590357	2634	6.15034	Gadd45b	"NM_008655"	exon	0.00376364	0.00774112	0.00583668	0.00761094	0.00563083	0.00561536	f	0.852883	f	0.804349	m	0.642508
chr10	80394460	80395332	CGI1924	44	0.727569	0.602679	672	6.54762	Gadd45b	"NM_008655"	exon	0.00347866	0.00291545	0.0105361	0.00475645	0.00505051	0.00380735	m	0.900657	m	0.694495	m	1
chr10	80396189	80396803	CGI1925	18	0.566384	0.555556	414	4.34783			intergenic	0.0104093	0.0192382	0.00534759	0	0.0131028	0	f	0.826916	m	0.78159	m	0.354356
chr10	80398439	80399004	CGI1926	19	0.607872	0.586301	365	5.20548			intergenic	0.016369	0.0142857	0.0155678	0.00740741	0	0	m	1	m	0.978137	-	NA
chr10	80398960	80399841	CGI1927	37	0.509439	0.654919	681	5.43319			intergenic	0.0125107	0.00745614	0.00696106	0.0112664	0.00239234	0	m	0.833877	f	0.78159	m	0.642306
chr10	80402292	80402945	CGI1928	30	0.748808	0.596026	453	6.62252			intergenic	0.0102855	0.00644995	0.00618581	0.00367647	0.0106688	0.00908661	m	0.919537	m	0.78159	m	0.696497
chr10	80415411	80415856	CGI1929	14	0.584135	0.632653	245	5.71429	Gng7	"NM_010319,NM_001038655"	exon	0.0449324	0.131262	0.00756303	0	0.0437448	0	f	0.611388	m	0.680442	m	0.0349948
chr10	80448000	80448893	CGI1930	39	0.551805	0.63925	693	5.62771	Gng7	"NM_010319,NM_001038655"	intron	0.00253968	0.00763753	0.00642479	0.00308025	0.00533911	0	f	0.795257	m	0.913288	m	0.354356
chr10	80460601	80461123	CGI1931	14	0.559382	0.559006	322	4.34783	Gng7	"NM_010319,NM_001038655"	exon	0.0728317	0.0450944	0.0115995	0.0104493	0.0306806	0	m	0.666624	m	0.927142	m	0.0352402
chr10	80462110	80462956	CGI1932	32	0.537488	0.609907	646	4.95356	Gng7	"NM_010319,NM_001038655"	intron	0.0788299	0.0765525	0.00975976	0.015504	0.0099729	0.00656371	m	1	f	0.6724	m	0.655663
chr10	80477441	80477960	CGI1933	21	0.600006	0.664577	319	6.58307	Gng7	"NM_010319"	exon	0.00485714	0.00654971	0.0128232	0.00173913	0.00461538	0.00808081	f	1	m	0.763129	f	1
chr10	80484338	80485472	CGI1934	53	0.617262	0.607066	934	5.67452	Diras1	"NM_145217"	exon	0.0533819	0.0456745	0.00113636	0	0.01173	0.000956938	m	0.820447	m	0.78159	m	0.275724
chr10	80487413	80488566	CGI1935	48	0.457089	0.668416	953	5.03673	Diras1	"NM_145217"	exon	0.0245415	0.0226879	0.00247669	0.0167024	0.030815	0.020202	m	0.874352	f	0.644324	m	0.69055
chr10	80499630	80500383	CGI1936	33	0.66548	0.611212	553	5.96745			intergenic	0.00505051	0.0181408	0.019442	0.00519481	0.0135143	0.0113492	f	0.545199	m	0.674225	m	0.697863
chr10	80522423	80523291	CGI1937	45	0.73427	0.606287	668	6.73653	Sgta	"NM_024499"	exon	0.0099359	0.00596065	0.00529101	0.00646787	0.00622106	0.00173611	m	0.794615	f	0.78159	m	0.642306
chr10	80532254	80533385	CGI1938	53	0.718008	0.56391	931	5.6928	Thop1	"NM_022653"	exon	0.00474717	0.0121598	0.0188574	0.0102656	0.0075431	0.00698499	f	0.794615	m	0.613383	m	0.867141
chr10	80542674	80543483	CGI1939	29	0.47048	0.63711	609	4.7619	Thop1	"NM_022653"	exon	0.166255	0.129365	0.0164458	0.00768565	0.227332	0	m	0.545199	m	0.511527	m	7.49189e-10
chr10	80568041	80569685	CGI1940	92	0.667169	0.629501	1444	6.37119	Map2k2	"NM_023138"	exon	0.00233083	0.00748531	0.00582741	0.0104798	0.00881995	0.00503247	f	0.784892	f	0.936631	m	0.805285
chr10	80591640	80592538	CGI1941	38	0.539134	0.636103	698	5.44413			intergenic	0.00598262	0.00872502	0.00496642	0.0101563	0.00822955	0.00337838	f	1	f	1	m	0.642306
chr10	80596858	80597331	CGI1942	15	0.530809	0.644689	273	5.49451			intergenic	0	0.00840336	0.00309598	0.013019	0.00904977	0.0277778	f	0.794615	f	0.78159	f	0.931248
chr10	80597796	80601616	CGI1943	284	0.717288	0.661878	3620	7.8453	Zbtb7a	"NM_010731"	exon	0.0120492	0.0113824	0.00809332	0.00772843	0.00891696	0.00319302	m	0.867512	m	1	m	0.414008
chr10	80610482	80611507	CGI1944	59	0.718103	0.632727	825	7.15152	Zbtb7a	"NM_010731"	exon	0.207168	0.206043	0.0115534	0.0139551	0.0291317	0	m	1	f	0.950658	m	0.00140658
chr10	80615993	80617470	CGI1945	90	0.663055	0.65231	1277	7.04777	Pias4	"NM_021501"	exon	0.165303	0.154755	0.0182312	0.0184097	0.0267881	0.000988142	m	0.895667	f	0.950678	m	0.000305551
chr10	80629656	80630888	CGI1946	66	0.656821	0.625969	1032	6.39535	Pias4	"NM_021501"	exon	0.0168382	0.00932718	0.00272567	0.00509358	0.0134255	0.00507503	m	0.794615	f	0.82226	m	0.491582
chr10	80631524	80632028	CGI1947	16	0.642789	0.582237	304	5.26316			intergenic	0.00478469	0.0223611	0.010989	0.0162637	0.00294118	0	f	0.791607	f	0.84057	m	0.743389
chr10	80635806	80636321	CGI1948	21	0.921676	0.546032	315	6.66667			intergenic	0.0193723	0.0119907	0.00705467	0	0.0115766	0.0015361	m	0.982899	m	0.6724	m	0.469417
chr10	80637350	80637970	CGI1949	21	0.668966	0.547619	420	5			intergenic	0.0182073	0.00818262	0	0.00357143	0.0145511	0.00446429	m	0.826673	f	0.78159	m	0.305882
chr10	80639010	80641021	CGI1950	112	0.705152	0.59249	1811	6.18443	Eef2	"NM_007907"	exon	0.0253221	0.0185014	0.0065755	0.0125669	0.0466707	0.00997111	m	0.994264	f	0.78159	m	0.00585537
chr10	80645192	80646200	CGI1951	51	0.77859	0.57302	808	6.31188	Dapk3,Eef2	"NM_001190474,NM_001190473","NM_007907"	exon	0.0147392	0.0228696	0.0133766	0.0120213	0.00975757	0	f	0.719645	m	0.695624	m	0.165503
chr10	80652518	80653531	CGI1952	51	0.681005	0.607626	813	6.27306	Dapk3	"NM_001190474,NM_001190473,NM_007828"	exon	0.147067	0.160636	0.0197379	0.0201192	0.0197704	0.00983471	f	0.795906	f	0.938321	m	0.28621
chr10	80654503	80656278	CGI1953	119	0.752473	0.63619	1575	7.55556	Dapk3	"NM_001190474,NM_001190473,NM_007828"	exon	0.0316587	0.0256355	0.0057987	0.0119993	0.00314949	0.00491007	m	0.734007	f	0.724654	f	0.833471
chr10	80657188	80657551	CGI1954	14	0.931853	0.613497	163	8.58896	2310050B05Rik	"NR_015477"	exon	0	0.0166667	0.0150433	0.0103759	0.014881	0.0111317	f	0.658785	m	1	m	1
chr10	80693020	80693577	CGI1955	17	0.548886	0.591036	357	4.7619	Atcay	"NM_178662"	exon	0.00978261	0.00618073	0.0081892	0.00395257	0.00324675	0.00983437	m	1	m	0.78159	f	0.804643
chr10	80695469	80696473	CGI1956	54	0.657323	0.661692	804	6.71642	Zfr2	"NM_001034895"	exon	0.07266	0.00495684	0.0167989	0.0108548	0.0133333	0.00548885	m	0.000190781	m	1	m	1
chr10	80702274	80703078	CGI1957	35	0.546679	0.653974	604	5.7947	Zfr2	"NM_001034895"	exon	0.00850315	0.0354898	0.00534341	0.00937467	0.0180622	0.00745257	f	0.543461	f	0.838919	m	0.492513
chr10	80707207	80707616	CGI1958	13	0.672429	0.61244	209	6.2201	Zfr2	"NM_001034895"	exon	0.0248994	0.0117647	0.00833333	0.00416667	0.153758	0.0178571	m	0.761986	m	1	m	0.00192102
chr10	80715612	80716211	CGI1959	21	0.541799	0.626566	399	5.26316			intergenic	0.0247446	0.0154567	0.0041521	0.00320513	0.00934066	0	m	0.893621	m	0.902613	m	0.354356
chr10	80719800	80721057	CGI1960	65	0.576166	0.653737	1057	6.14948	Matk	"NM_010768"	exon	0.00695971	0.0113063	0.0147554	0.0086963	0.00435686	0.00798611	f	0.88644	m	0.78159	f	1
chr10	80729080	80729914	CGI1961	44	0.902224	0.55836	634	6.94006	Mrpl54	"NM_025317"	exon	0.0093777	0.0036075	0.0017094	0.00393162	0.00522876	0.00647131	m	0.758293	f	0.895631	f	0.642306
chr10	80730694	80731269	CGI1962	23	0.72484	0.586667	375	6.13333	Apba3	"NM_018758"	exon	0.0045406	0.0118149	0.00404858	0.00512821	0.00854701	0.00549451	f	0.798333	f	1	m	0.818777
chr10	80739758	80740255	CGI1963	23	0.671442	0.686869	297	7.74411	Tjp3	"NM_013769"	exon	0.125751	0.0447996	0.0213358	0.0452124	0.0239583	0	m	0.30422	f	0.699075	m	0.25758
chr10	80741778	80742194	CGI1964	18	0.767102	0.662037	216	8.33333	Tjp3	"NM_013769"	exon	0.0962765	0.089097	0.00760668	0.00857843	0.00997151	0.0134199	m	0.794615	f	1	f	0.899301
chr10	80748091	80749178	CGI1965	65	0.744199	0.627959	887	7.32807	Tjp3	"NM_013769"	intron	0.0115532	0.0123404	0.00578492	0.0117605	0.00590767	0.00250391	f	0.806008	f	0.932	m	0.675757
chr10	80755183	80756714	CGI1966	102	0.770362	0.631104	1331	7.66341	Pip5k1c	"NM_001146687,NM_008844"	exon	0.0117905	0.0131154	0.00733332	0.0101619	0.0103053	0.00440075	f	0.806008	f	0.823504	m	0.446051
chr10	80765571	80766016	CGI1967	7	0.329323	0.595918	245	2.85714	Pip5k1c	"NM_001146687,NM_008844"	intron	0.282206	0.0767982	0.0314693	0.00833333	0.415118	0.00520833	m	0.192369	m	0.78159	m	0.000579747
chr10	80782342	80784610	CGI1968	142	0.809421	0.587041	2068	6.86654	Cactin,Pip5k1c	"NM_027381","NM_001146687,NM_008844"	exon	0.00793478	0.0143761	0.00952902	0.00349285	0.00492432	0.00510241	f	0.677627	m	0.51155	f	0.671314
chr10	80794903	80796118	CGI1969	77	0.711913	0.653202	1015	7.58621	Tbxa2r	"NM_009325"	exon	0.0414934	0.0633956	0.00639232	0.0046848	0.0240774	0.00340695	f	0.442278	m	0.895631	m	0.0398472
chr10	80800387	80801242	CGI1970	46	0.662832	0.651908	655	7.0229	Gipc3	"NM_148951"	exon	0.0512324	0.0453978	0.00888911	0.0161333	0.0068658	0.0112468	m	0.900035	f	0.891702	f	0.818182
chr10	80805514	80806552	CGI1971	73	0.745153	0.686158	838	8.71122	Gipc3	"NM_148951"	exon	0.00927441	0.00649389	0.0126274	0.0106627	0.0108846	0.00442656	m	1	m	1	m	0.379268
chr10	80808805	80810303	CGI1972	73	0.579227	0.627119	1298	5.62404	Hmg20b	"NM_010440,NM_001163165,NM_001163166"	exon	0.00915713	0.0195323	0.00264215	0.0033968	0.00105485	0.00456871	f	0.740629	f	0.925809	f	0.635021
chr10	80812458	80813850	CGI1973	84	0.751108	0.620805	1192	7.04698	Hmg20b	"NM_010440,NM_001163165,NM_001163166"	exon	0.0128002	0.00745729	0.00991667	0.00724549	0.00915033	0.0033086	m	0.794615	m	0.709219	m	0.485174
chr10	80819737	80821300	CGI1974	95	0.750015	0.611152	1363	6.96992	Mfsd12	"NM_028657"	exon	0.00564208	0.0118725	0.00829829	0.00366063	0.00923209	0.00980091	f	1	m	0.783989	f	0.723716
chr10	80826476	80828289	CGI1975	85	0.538422	0.626162	1613	5.26968	4930404N11Rik,Mfsd12	"NM_001014836","NM_028657"	exon	0.0158878	0.0172967	0.00919594	0.00470583	0.00784632	0.00703939	f	1	m	0.805549	m	0.84315
chr10	80840433	80842011	CGI1976	104	0.740801	0.638607	1378	7.54717	Fzr1	"NM_019757"	exon	0.00674453	0.0105537	0.00672637	0.00895529	0.00247849	0.00412625	f	0.849571	f	0.78159	f	0.864774
chr10	80846729	80847962	CGI1977	63	0.754702	0.569216	1033	6.09874	Dohh	"NM_133964"	exon	0.00586573	0.00479676	0.00860928	0.000603865	0.00365079	0.00546354	m	0.950659	m	0.450328	f	1
chr10	80862805	80863547	CGI1978	29	0.503712	0.658672	542	5.35055	Nfic	"NM_026756,NM_008688"	exon	0.046894	0.0866461	0.0112288	0.0133117	0.0348876	0	f	0.794615	f	0.728822	m	0.027472
chr10	80870029	80870661	CGI1979	24	0.687305	0.569444	432	5.55556	Nfic	"NM_026756,NM_008688"	exon	0.0474941	0.016721	0.017037	0	0.0613784	0.00418301	m	0.296859	m	0.58402	m	0.000287244
chr10	80882820	80883644	CGI1980	43	0.701607	0.637821	624	6.89103	Nfic	"NM_026756,NM_008688"	exon	0.136602	0.10067	0.00986106	0.0180027	0.00828214	0	m	0.68174	f	0.500399	m	0.186694
chr10	80888834	80890587	CGI1981	81	0.526604	0.631681	1553	5.21571	Nfic	"NM_026756,NM_008688"	exon	0.00189394	0.00383142	0.00856292	0	0.00611377	0.00722384	f	1	m	0.591325	f	0.95645
chr10	80892108	80894607	CGI1982	198	0.757233	0.674641	2299	8.61244			intergenic	0.00562932	0.0104278	0.0105174	0.0078703	0.00730594	0.00413383	f	0.795906	m	0.798918	m	0.866338
chr10	80895211	80896162	CGI1983	33	0.527552	0.577896	751	4.39414			intergenic	0.0382719	0.0443629	0.023284	0.00757576	0.0109329	0.00828598	f	0.940457	m	0.257173	m	0.886949
chr10	80896255	80897074	CGI1984	25	0.439593	0.612278	619	4.03877			intergenic	0.079257	0.117757	0.00982853	0.0231225	0.0154622	0.00213675	f	0.805027	f	0.805206	m	0.485013
chr10	80914988	80916221	CGI1985	51	0.532732	0.610842	1033	4.93708			intergenic	0.0334346	0.0121518	0.00974138	0.0137211	0.0121691	0.00132275	m	0.46175	f	1	m	0.221604
chr10	80918092	80918602	CGI1986	14	0.427874	0.651613	310	4.51613			intergenic	0.116212	0.0879712	0	0.00228833	0.00955566	0	m	0.823602	f	0.78159	m	0.480598
chr10	80922095	80922554	CGI1987	18	1.09143	0.505792	259	6.94981	Celf5	"NM_176954"	exon	0.0544327	0.1229	0	0.0173611	0.024504	0	f	0.432517	f	0.6724	m	0.318147
chr10	80923132	80923534	CGI1988	11	0.692635	0.564356	202	5.44554	Celf5	"NM_176954"	exon	0.080327	0.0452082	0.019536	0.0122549	0.0172549	0	m	0.930216	m	0.83379	m	0.491488
chr10	80926782	80927630	CGI1989	41	0.590001	0.677469	648	6.32716	Celf5	"NM_176954"	exon	0.00787318	0.00589198	0.00547311	0.00244961	0.00725338	0.0138317	m	0.835263	m	0.914501	f	0.95917
chr10	80933208	80933720	CGI1990	21	0.619633	0.685897	312	6.73077	Celf5	"NM_176954"	exon	0.063675	0.0604408	0.024326	0	0	0.00378788	m	1	m	0.58402	f	0.642306
chr10	80935814	80936257	CGI1991	14	0.542231	0.679012	243	5.76132	Celf5	"NM_176954"	intron	0	0	0	0	0.00228833	0	-	NA	-	NA	m	0.679125
chr10	80944441	80945946	CGI1992	73	0.564986	0.651341	1305	5.59387	Celf5	"NM_176954"	exon	0.0153726	0.0169843	0.0128771	0.00859302	0.00983092	0.00882353	f	0.986019	m	0.742983	m	0.459042
chr10	80958145	80959502	CGI1993	79	0.711812	0.627485	1157	6.828	Ncln	"NM_134009"	exon	0.0147163	0.00687751	0.00957867	0.00488382	0.00641295	0.00849828	m	0.794615	m	0.6724	f	1
chr10	80961165	80962471	CGI1994	53	0.482175	0.631103	1106	4.79204	S1pr4	"NM_010102"	exon	0.153193	0.1888	0.0225249	0.014116	0.0329246	0.0151597	f	0.609527	m	0.915861	m	0.348489
chr10	80965338	80966301	CGI1995	46	0.632634	0.618611	763	6.02883	Gna15	"NM_010304"	exon	0.050713	0.0160861	0.0126609	0.0027592	0.0101809	0.00378151	m	0.680525	m	0.433153	m	0.324567
chr10	80974970	80975412	CGI1996	13	0.65595	0.586777	242	5.3719	Gna15	"NM_010304"	exon	0.0915123	0.110276	0.00810185	0	0.0116612	0	f	0.806185	m	0.6724	m	0.346286
chr10	80989420	80989984	CGI1997	14	0.455278	0.587912	364	3.84615			intergenic	0.0886806	0.0985891	0.0037037	0.00744048	0.0394621	0.0101852	f	1	f	0.895631	m	0.432874
chr10	81006586	81008606	CGI1998	157	0.826407	0.646703	1820	8.62637	Gna11	"NM_010301"	exon	0.00721823	0.00447349	0.0162203	0.00503343	0.00994557	0.00504522	m	0.91555	m	0.393882	m	0.550897
chr10	81021677	81023440	CGI1999	93	0.549664	0.677543	1563	5.9501	Aes	"NM_010347"	exon	0.0146504	0.01398	0.00740468	0.00350877	0.00164204	0.00121212	m	1	m	0.6724	m	1
[truncated: 21,024 more rows]
