# Supplementary material for: High-resolution DNA methylome analysis of primordial germ cells identifies gender-specific reprogramming in mice
Source: HighWire-hosted journal article supplement (doi:10.1101/gr.148023.112), 2013-02-14
Supplement: TableS5.xlsx [file TableS5.xlsx]

## Sheet: E13.5mPGC
Supplementary Table 6. List of CGIs resistant to demethylation in PGCs
List of demethylation-resistant CGIs in E13.5mPGC
Chromosome	Start	End	ID	Symbol	Category	CGI methylation level in E13.5mPGC
chrX	166434713	166436290	CGI23074		intergenic	0.626041
chrX	166426425	166427613	CGI23067	Mid1	exon	0.619677
chrX	166427775	166428554	CGI23068	Mid1	exon	0.59346
chrX	166431797	166432490	CGI23071		intergenic	0.586937
chrX	166423615	166424116	CGI23065	Mid1	exon	0.567006
chr12	3523401	3523774	CGI4359		intergenic	0.564341
chrX	166424453	166425902	CGI23066	Mid1	exon	0.553105
chrX	166422724	166423307	CGI23064	Mid1	exon	0.535199
chr4	121755994	121756935	CGI14734		intergenic	0.528806
chr13	120276466	120278109	CGI6144	3110070M22Rik,Gm7120	exon	0.520665
chrX	166429333	166429719	CGI23069		intergenic	0.505071
chr13	120283691	120284379	CGI6145	Gm7120	exon	0.471111
chr6	33220596	33221206	CGI17279	Exoc4	intron	0.467541
chr8	3754296	3754658	CGI20035		intergenic	0.463581
chr9	88961375	88961748	CGI22121		intergenic	0.461135
chrX	166433733	166434397	CGI23073		intergenic	0.451473
chr10	11211672	11212087	CGI1299		intergenic	0.429241
chrX	166419640	166420140	CGI23063	Mid1	exon	0.423244
chr10	89597756	89598276	CGI2096	Anks1b	intron	0.392509
chr2	27351221	27351631	CGI11371		intergenic	0.387977
chr16	18976567	18976963	CGI8064		intergenic	0.381647
chrX	166436823	166437707	CGI23075		intergenic	0.377793
chr13	60307186	60307603	CGI5751	Gm5084	exon	0.367599
chr12	20235897	20236599	CGI4466		intergenic	0.351223
chr4	146593505	146593903	CGI15277	Gm13152	intron	0.341928
chr12	20238560	20240297	CGI4467		intergenic	0.336738
chr7	89919635	89920654	CGI19370	Eftud1	intron	0.330378
chrY	2881037	2881693	CGI23105		intergenic	0.3252
chrX	166431112	166431470	CGI23070		intergenic	0.321115
chrX	166416375	166416828	CGI23061	G530011O06Rik,Mid1	exon	0.320919
chr6	85845296	85845649	CGI17651		intergenic	0.320341
chr17	22057854	22058344	CGI8664		intergenic	0.314874
chr11	3091921	3094773	CGI2469	Sfi1	exon	0.312272
chr3	8785673	8786160	CGI12965		intergenic	0.302519
chr5	103794332	103794707	CGI16134		intergenic	0.301224
chrX	76102103	76102463	CGI22813		intergenic	0.301052
chr12	100883024	100883754	CGI4980		intergenic	0.289293
chrX	166443103	166443557	CGI23076		intergenic	0.287774
chrX	57736459	57736883	CGI22742		intergenic	0.282955
chr4	149263306	149263660	CGI15338		intergenic	0.278846
chr1	60977906	60978287	CGI306		intergenic	0.264633
chr17	5949196	5949845	CGI8566	Synj2	intron	0.261905
chr2	93017799	93018250	CGI11941		intergenic	0.261905
chr5	130491917	130492501	CGI16691	Asl	exon	0.255028
chr4	102166752	102167192	CGI14507	Pde4b	intron	0.254316
chr13	105450501	105451157	CGI6060	Cwc27	intron	0.243978
chr7	7230339	7231364	CGI18306	Vmn2r29	exon	0.241
chr11	3005304	3005705	CGI2430		intergenic	0.239991
chrX	166416905	166417450	CGI23062	Mid1	intron	0.236633
chrY	2872671	2873233	CGI23103		intergenic	0.220957
chr12	107332991	107333395	CGI5058		intergenic	0.201667
chr17	20707665	20708151	CGI8649		intergenic	0.201648
chr1	87488774	87489548	CGI490	Sp110	intron	0.197237
chr2	164223641	164224162	CGI12654	Matn4	intron	0.193367
chr19	57193779	57194235	CGI11096	Ablim1	intron	0.193277
chr18	3638776	3639243	CGI9664		intergenic	0.193182
chr1	87487723	87488597	CGI489	Sp110	exon	0.190454
chr2	181652064	181652699	CGI12942		intergenic	0.19001
chr2	98502288	98503239	CGI11966		intergenic	0.18916
chr3	49186411	49186837	CGI13127		intergenic	0.18907
chr7	146021126	146021675	CGI19865		intergenic	0.18638
chr2	133963234	133963659	CGI12318		intergenic	0.183071
chr8	108502749	108503570	CGI20961	Dpep3	exon	0.180882
chr3	28590177	28590543	CGI13027		intergenic	0.180722
chr2	98506296	98507592	CGI11968		intergenic	0.180613
chrX	5135169	5135525	CGI22559		intergenic	0.176722
chr19	38598756	38599700	CGI10807	Plce1	exon	0.17503
chr5	119890569	119890987	CGI16449		intergenic	0.169643
chr5	27068491	27068951	CGI15634		intergenic	0.167942
chr11	6606477	6606925	CGI2568		intergenic	0.167017
chrY	2898092	2898665	CGI23113		intergenic	0.167013
chr7	30679139	30679894	CGI18768	Zfp27	exon	0.166205
chr9	4259934	4260993	CGI21333		intergenic	0.166203
chr6	30687664	30688606	CGI17261	Mest	exon	0.164563
chr17	72428356	72428839	CGI9484	Alk	intron	0.164447
chr8	77331349	77331768	CGI20597		intergenic	0.163048
chr12	114442420	114442800	CGI5208		intergenic	0.161944
chr9	115060510	115060875	CGI22440	Osbpl10	intron	0.159492
chr18	37128383	37129585	CGI9886	Pcdha1,Pcdha2,Pcdha3,Pcdha4,Pcdha4-g,Pcdha5,Pcdha6	exon	0.159029
chr9	3029287	3029810	CGI21325		intergenic	0.158796
chrY	2887637	2888575	CGI23110		intergenic	0.157893
chr9	3002010	3002415	CGI21318		intergenic	0.155152
chr9	3004403	3004940	CGI21319		intergenic	0.155151
chr12	3109767	3110227	CGI4352		intergenic	0.154573
chr10	61215756	61216377	CGI1616	H2afy2	exon	0.154416
chr5	91319773	91320636	CGI16043	Cxcl1	exon	0.154033
chr11	3049495	3051686	CGI2444	Sfi1	intron	0.153295
chr6	124502793	124503185	CGI17961		intergenic	0.151264
chr9	35112695	35113181	CGI21556		intergenic	0.150929
chr11	3073167	3073909	CGI2458	Sfi1	intron	0.147008
chr5	137227954	137228462	CGI16799	Emid2	intron	0.145709
chr3	72851491	72851907	CGI13264		intergenic	0.144558
chr11	3001631	3002186	CGI2429		intergenic	0.144324
chr9	97265901	97266804	CGI22175	Trim42	exon	0.144251
chr2	128952852	128953229	CGI12246		intergenic	0.142857
chr8	4777913	4778305	CGI20058	Shcbp1	intron	0.141497
chr14	31229965	31230369	CGI6271	Cacna1d	intron	0.141241
chr11	3088632	3089528	CGI2468	Sfi1	exon	0.139566
chr14	72768675	72769076	CGI6717		intergenic	0.137093
chr9	3031787	3032160	CGI21326		intergenic	0.135515
chr14	52055685	52056210	CGI6423		intergenic	0.133764
chr9	3018666	3019591	CGI21321		intergenic	0.133572
chr5	128221653	128222040	CGI16656		intergenic	0.133501
chr5	38868416	38868874	CGI15816	Slc2a9	exon	0.133454
chr9	3037908	3038330	CGI21329		intergenic	0.133411
chr4	79649716	79651061	CGI14394		intergenic	0.132308
chr9	3035624	3036689	CGI21328		intergenic	0.132034
chr9	2999926	3001202	CGI21317		intergenic	0.131375
chr2	27352837	27353539	CGI11373		intergenic	0.131031
chr12	54936792	54937439	CGI4603	Npas3	intron	0.129198
chr7	24890526	24891118	CGI18525	Zfp180	exon	0.127289
chr7	17040258	17040736	CGI18378	Tmem160	exon	0.126937
chr7	46538235	46538705	CGI18908		intergenic	0.125586
chr4	121770787	121771399	CGI14735		intergenic	0.1254
chr5	149649191	149649549	CGI17081		intergenic	0.125284
chr18	37561930	37562856	CGI9908	Pcdha4-g,Pcdhb9	exon	0.124243
chr12	9943283	9943692	CGI4409		intergenic	0.124074
chr2	27351778	27352501	CGI11372		intergenic	0.12363
chr14	105195614	105196000	CGI6826	D130009I18Rik	intron	0.121892
chr3	88156782	88157162	CGI13372	Smg5	exon	0.121712
chr4	86702396	86702849	CGI14426	Slc24a2	intron	0.121605
chr11	3027042	3027702	CGI2432	Pisd-ps1,Pisd-ps3	exon	0.121488
chr17	26568582	26569444	CGI8808	Neurl1b	exon	0.119592
chr7	142927312	142927834	CGI19850		intergenic	0.119468
chr12	101737657	101738073	CGI4988	Ttc7b	intron	0.119462
chr10	93628143	93628533	CGI2123	Nr2c1	exon	0.119345
chr2	164222782	164223367	CGI12653	Matn4	exon	0.1186
chrX	92018994	92019673	CGI22836		intergenic	0.118431
chr14	52002368	52003333	CGI6421		intergenic	0.117369
chr14	72785265	72785779	CGI6718		intergenic	0.114927
chr5	135908297	135909050	CGI16755	Hip1	exon	0.114236
chr11	3029434	3030179	CGI2434	Pisd-ps1,Pisd-ps3	exon	0.113847
chr18	63651558	63652104	CGI10131		intergenic	0.113684
chr1	191073698	191074335	CGI1194	Kcnk2	intron	0.113438
chr9	3026225	3027280	CGI21324		intergenic	0.113334
chr17	58707116	58707540	CGI9406		intergenic	0.112955
chr9	120742925	120743384	CGI22508		intergenic	0.112945
chr9	3025220	3026008	CGI21323		intergenic	0.11145
chr13	100462838	100463303	CGI6026		intergenic	0.111383
chr11	101328467	101328841	CGI3873		intergenic	0.111111
chr2	84498902	84499676	CGI11859	Gm13718	exon	0.110015
chr4	85987856	85988339	CGI14415	Adamtsl1	exon	0.109931
chr2	98503698	98504350	CGI11967		intergenic	0.109176
chr18	37152162	37152646	CGI9888	Pcdha1,Pcdha2,Pcdha3,Pcdha4,Pcdha4-g,Pcdha5,Pcdha6,Pcdha7,Pcdha8	exon	0.108965
chr18	37516297	37516736	CGI9907	Pcdha4-g,Pcdhb8	exon	0.108555
chr9	69352798	69353196	CGI21991		intergenic	0.108327
chr15	100726889	100727359	CGI7756	Scn8a	intron	0.107467
chr7	25370026	25370389	CGI18547	Zfp575	exon	0.105678
chr17	5886904	5887261	CGI8563	Snx9	exon	0.105238
chr18	37090968	37092303	CGI9880	Pcdha1	exon	0.104438
chr11	33649379	33649845	CGI2720	Kcnip1	intron	0.103157
chr7	146021737	146022364	CGI19866		intergenic	0.102785
chr3	20214712	20215214	CGI13010	Agtr1b	exon	0.102751
chrX	121269063	121269432	CGI22927		intergenic	0.102564
chr1	182219564	182219985	CGI1105		intergenic	0.102109
chr7	46791816	46792351	CGI18913	Zfp619	exon	0.101495
chr5	31502610	31503039	CGI15705	Zfp513	exon	0.101493
chr15	39961787	39962259	CGI7064		intergenic	0.100855
chr9	3032251	3032811	CGI21327		intergenic	0.100746
chr3	138389710	138390194	CGI13878	4930425O10Rik	exon	0.100366
chr2	14661079	14661570	CGI11220	Cacnb2	intron	0.1

## Sheet: E13.5fPGC
List of demethylation-resistant CGIs in E13.5fPGC
Chromosome	Start	End	ID	Symbol	Category	CGI methylation level in E13.5fPGC
chrX	76102103	76102463	CGI22813		intergenic	0.605916
chrX	166426425	166427613	CGI23067	Mid1	exon	0.595933
chr12	3523401	3523774	CGI4359		intergenic	0.576993
chr10	89597756	89598276	CGI2096	Anks1b	intron	0.5478
chr4	121755994	121756935	CGI14734		intergenic	0.542491
chr8	3754296	3754658	CGI20035		intergenic	0.536536
chr13	120276466	120278109	CGI6144	3110070M22Rik,Gm7120	exon	0.532924
chrX	166423615	166424116	CGI23065	Mid1	exon	0.529753
chr13	120283691	120284379	CGI6145	Gm7120	exon	0.520182
chrX	166427775	166428554	CGI23068	Mid1	exon	0.505818
chr12	10456540	10456893	CGI4413		intergenic	0.5
chrX	166431797	166432490	CGI23071		intergenic	0.496297
chr6	33220596	33221206	CGI17279	Exoc4	intron	0.485359
chrX	166424453	166425902	CGI23066	Mid1	exon	0.477048
chrX	166422724	166423307	CGI23064	Mid1	exon	0.472886
chr2	27351221	27351631	CGI11371		intergenic	0.457292
chr12	20235897	20236599	CGI4466		intergenic	0.453339
chr10	11211672	11212087	CGI1299		intergenic	0.441306
chrX	166434713	166436290	CGI23074		intergenic	0.435611
chr12	20238560	20240297	CGI4467		intergenic	0.425442
chr15	100726889	100727359	CGI7756	Scn8a	intron	0.403427
chr17	22057854	22058344	CGI8664		intergenic	0.386041
chr11	3005304	3005705	CGI2430		intergenic	0.380681
chr3	49186411	49186837	CGI13127		intergenic	0.369547
chr12	100883024	100883754	CGI4980		intergenic	0.360032
chrX	166419640	166420140	CGI23063	Mid1	exon	0.352856
chrX	5135169	5135525	CGI22559		intergenic	0.350252
chr5	103794332	103794707	CGI16134		intergenic	0.349459
chr9	88961375	88961748	CGI22121		intergenic	0.344616
chrX	166429333	166429719	CGI23069		intergenic	0.343927
chrX	166433733	166434397	CGI23073		intergenic	0.343457
chr11	3091921	3094773	CGI2469	Sfi1	exon	0.341154
chr4	102166752	102167192	CGI14507	Pde4b	intron	0.328571
chr3	8785673	8786160	CGI12965		intergenic	0.324967
chr16	18976567	18976963	CGI8064		intergenic	0.307808
chr4	146593505	146593903	CGI15277	Gm13152	intron	0.289571
chr2	164223641	164224162	CGI12654	Matn4	intron	0.287337
chr6	85845296	85845649	CGI17651		intergenic	0.284084
chr13	60307186	60307603	CGI5751	Gm5084	exon	0.282593
chr19	38598756	38599700	CGI10807	Plce1	exon	0.281435
chr17	5949196	5949845	CGI8566	Synj2	intron	0.27369
chrX	166416375	166416828	CGI23061	G530011O06Rik,Mid1	exon	0.272409
chr15	29316585	29316995	CGI6991		intergenic	0.265262
chr9	3029287	3029810	CGI21325		intergenic	0.264973
chr2	27352837	27353539	CGI11373		intergenic	0.258716
chr1	60977906	60978287	CGI306		intergenic	0.254553
chr6	124502793	124503185	CGI17961		intergenic	0.251423
chr13	105450501	105451157	CGI6060	Cwc27	intron	0.25073
chr7	30679139	30679894	CGI18768	Zfp27	exon	0.249804
chr4	121770787	121771399	CGI14735		intergenic	0.244898
chr2	164222782	164223367	CGI12653	Matn4	exon	0.243806
chrX	166431112	166431470	CGI23070		intergenic	0.242269
chrX	166436823	166437707	CGI23075		intergenic	0.236585
chr9	4259934	4260993	CGI21333		intergenic	0.232563
chr12	107332991	107333395	CGI5058		intergenic	0.228671
chr7	7230339	7231364	CGI18306	Vmn2r29	exon	0.227866
chr6	149311085	149311509	CGI18195		intergenic	0.221007
chrX	166416905	166417450	CGI23062	Mid1	intron	0.219924
chr7	89919635	89920654	CGI19370	Eftud1	intron	0.218759
chr8	15389086	15389605	CGI20131		intergenic	0.217262
chr8	108502749	108503570	CGI20961	Dpep3	exon	0.210402
chr9	97265901	97266804	CGI22175	Trim42	exon	0.209974
chr15	100726141	100726592	CGI7755	Scn8a	intron	0.209383
chr4	23446187	23446706	CGI14086		intergenic	0.206765
chr18	37128383	37129585	CGI9886	Pcdha1,Pcdha2,Pcdha3,Pcdha4,Pcdha4-g,Pcdha5,Pcdha6	exon	0.205843
chr1	139322315	139322704	CGI822		intergenic	0.203968
chr9	115060510	115060875	CGI22440	Osbpl10	intron	0.2
chr6	4696691	4698891	CGI17126	Peg10,Sgce	exon	0.192976
chrX	166443103	166443557	CGI23076		intergenic	0.192763
chr5	130491917	130492501	CGI16691	Asl	exon	0.186221
chr18	3638776	3639243	CGI9664		intergenic	0.18447
chr2	98506296	98507592	CGI11968		intergenic	0.183978
chr1	87488774	87489548	CGI490	Sp110	intron	0.183365
chrX	92018994	92019673	CGI22836		intergenic	0.182812
chr3	58470240	58470660	CGI13204		intergenic	0.180341
chr1	29793848	29794280	CGI97		intergenic	0.178809
chr2	98502288	98503239	CGI11966		intergenic	0.176164
chr7	17357173	17357618	CGI18387		intergenic	0.174607
chrX	35474163	35475178	CGI22676	Rhox13	exon	0.174514
chrX	25179695	25180087	CGI22657		intergenic	0.174401
chr8	77331349	77331768	CGI20597		intergenic	0.173149
chr13	100462838	100463303	CGI6026		intergenic	0.171807
chr5	119890569	119890987	CGI16449		intergenic	0.164311
chr1	87487723	87488597	CGI489	Sp110	exon	0.161984
chr8	28406371	28406805	CGI20221	Gm9731	exon	0.16176
chr9	3002010	3002415	CGI21318		intergenic	0.158763
chr7	146021737	146022364	CGI19866		intergenic	0.157485
chr14	52054278	52055400	CGI6422		intergenic	0.157359
chr14	25177464	25177837	CGI6235		intergenic	0.15702
chr14	52055685	52056210	CGI6423		intergenic	0.15576
chr9	3015968	3016455	CGI21320		intergenic	0.153818
chr7	24890526	24891118	CGI18525	Zfp180	exon	0.152584
chr11	3088632	3089528	CGI2468	Sfi1	exon	0.151349
chr17	3878779	3879230	CGI8550		intergenic	0.151077
chr2	27351778	27352501	CGI11372		intergenic	0.150693
chr17	20707665	20708151	CGI8649		intergenic	0.150066
chr18	37561930	37562856	CGI9908	Pcdha4-g,Pcdhb9	exon	0.149305
chr11	6606477	6606925	CGI2568		intergenic	0.147642
chr11	3049495	3051686	CGI2444	Sfi1	intron	0.1475
chr4	146561517	146562050	CGI15276	Gm13152	intron	0.146231
chr9	35112695	35113181	CGI21556		intergenic	0.146034
chr7	106615976	106616335	CGI19465	Klhl35	intron	0.145833
chr10	121336280	121337000	CGI2298	Srgap1	intron	0.145759
chr7	46538235	46538705	CGI18908		intergenic	0.144648
chr11	3029434	3030179	CGI2434	Pisd-ps1,Pisd-ps3	exon	0.144359
chr7	67300279	67301048	CGI19177		intergenic	0.14401
chr12	114442420	114442800	CGI5208		intergenic	0.142522
chr9	3004403	3004940	CGI21319		intergenic	0.142477
chr5	31502610	31503039	CGI15705	Zfp513	exon	0.141612
chr2	181652064	181652699	CGI12942		intergenic	0.141293
chr1	85268775	85269175	CGI487		intergenic	0.137139
chr18	37134531	37136025	CGI9887	Pcdha1,Pcdha2,Pcdha3,Pcdha4,Pcdha4-g,Pcdha5,Pcdha6,Pcdha7	exon	0.137098
chr1	154122048	154122474	CGI854		intergenic	0.135055
chrX	17090554	17090932	CGI22639		intergenic	0.134551
chr9	3031787	3032160	CGI21326		intergenic	0.132798
chr7	6681989	6683417	CGI18301	Peg3	exon	0.130923
chr7	146021126	146021675	CGI19865		intergenic	0.130227
chr15	96730263	96730637	CGI7609		intergenic	0.13016
chr2	98503698	98504350	CGI11967		intergenic	0.130046
chr10	86371301	86372044	CGI2071	Stab2	intron	0.129935
chr9	114488926	114489435	CGI22426		intergenic	0.12971
chr11	3027042	3027702	CGI2432	Pisd-ps1,Pisd-ps3	exon	0.129622
chrX	154006767	154007179	CGI23017	Mbtps2,Yy2	exon	0.129011
chr9	3018666	3019591	CGI21321		intergenic	0.127723
chr2	172805168	172805777	CGI12835	Spo11	exon	0.127719
chr12	3109767	3110227	CGI4352		intergenic	0.127326
chr11	43276643	43277204	CGI2747		intergenic	0.127312
chr9	3037908	3038330	CGI21329		intergenic	0.127036
chr11	3001631	3002186	CGI2429		intergenic	0.125716
chr18	37090968	37092303	CGI9880	Pcdha1	exon	0.125642
chrX	5659980	5660650	CGI22561	AU022751	exon	0.124843
chr6	30687664	30688606	CGI17261	Mest	exon	0.124781
chr13	115686625	115687295	CGI6124	Itga2	intron	0.122817
chr3	29894934	29895497	CGI13031	Mecom	intron	0.122727
chr10	57687046	57687544	CGI1556		intergenic	0.122596
chr5	22058271	22058767	CGI15575		intergenic	0.122209
chr7	25370026	25370389	CGI18547	Zfp575	exon	0.122125
chr9	3035624	3036689	CGI21328		intergenic	0.121839
chr10	62875546	62875908	CGI1652		intergenic	0.121781
chr18	37516297	37516736	CGI9907	Pcdha4-g,Pcdhb8	exon	0.120777
chr9	2999926	3001202	CGI21317		intergenic	0.120511
chr13	101980120	101980501	CGI6044		intergenic	0.119805
chr9	3025220	3026008	CGI21323		intergenic	0.119715
chrX	5659115	5659919	CGI22560	AU022751	exon	0.119315
chr13	8931115	8931698	CGI5261		intergenic	0.118458
chr8	122714976	122715445	CGI21135		intergenic	0.117286
chr5	10634821	10635214	CGI15546		intergenic	0.117132
chr2	167106067	167106535	CGI12736		intergenic	0.116093
chr14	52002368	52003333	CGI6421		intergenic	0.115532
chr10	57694540	57695051	CGI1558	Dux	exon	0.11496
chr13	85266204	85267221	CGI5915		intergenic	0.114021
chr2	93017799	93018250	CGI11941		intergenic	0.111111
chr3	97115340	97115749	CGI13587		intergenic	0.111111
chr16	43609284	43610395	CGI8276	Zbtb20	exon	0.110805
chr18	13131236	13133240	CGI9727	Impact	exon	0.109453
chrX	51059809	51060397	CGI22722	1700013H16Rik	intron	0.108912
chr13	36704761	36705206	CGI5447		intergenic	0.108879
chr5	129083595	129084042	CGI16661		intergenic	0.108799
chr11	109149480	109150505	CGI4050	Rgs9	intron	0.108754
chr4	144177929	144178560	CGI15263		intergenic	0.108307
chr11	3073167	3073909	CGI2458	Sfi1	intron	0.107934
chr10	24806328	24806867	CGI1395		intergenic	0.107702
chr13	53600013	53600612	CGI5625		intergenic	0.106182
chr14	44825628	44825982	CGI6355		intergenic	0.10587
chr4	150517981	150519380	CGI15369	Camta1	exon	0.105762
chr17	7964027	7964514	CGI8579	Fndc1	exon	0.10571
chr12	117231609	117232007	CGI5212		intergenic	0.105252
chr9	22753157	22753543	CGI21491		intergenic	0.105118
chr6	145564144	145564816	CGI18160	Tuba3b	exon	0.105108
chr9	3026225	3027280	CGI21324		intergenic	0.104956
chr14	46380587	46381038	CGI6366		intergenic	0.104882
chr2	72367823	72368200	CGI11758		intergenic	0.103353
chr13	38645788	38646194	CGI5469		intergenic	0.103333
chr14	106505200	106506160	CGI6833	Trim52	exon	0.101399
chr16	36709410	36709910	CGI8241	Ildr1	exon	0.100606
chr5	109980276	109981017	CGI16212		intergenic	0.10012
