# Supplementary material for: High-resolution DNA methylome analysis of primordial germ cells identifies gender-specific reprogramming in mice
Source: HighWire-hosted journal article supplement (doi:10.1101/gr.148023.112), 2013-02-14
Supplement: TableS6.xlsx [file TableS6.xlsx]

## Sheet: E10.5_mgPMR
Supplementary Table 6. List of gender-specific PMRs in developing mouse PGCs.
List of mgPMRs at E10.5
Chromosome	ID	Start	End	Symbol	CGI methylation level		U-test
					10.5mPGC	10.5fPGC	P-value
chr4	CGI14344	59047690	59049028	Gng10	0.0941645	0.0252225	2.016e-06
chr6	CGI17361	47974378	47975698	Zfp777	0.450359	0.308212	4.10092e-06
chr10	CGI1956	80695469	80696473	Zfr2	0.07266	0.00495684	0.000190781
chrX	CGI23071	166431797	166432490		0.683191	0.493656	0.000206369
chr9	CGI22426	114488926	114489435		0.530275	0.239909	0.000265472
chr4	CGI14861	128444091	128444973	A3galt2	0.250429	0.12597	0.000332681
chr18	CGI9968	38357356	38357857	Pcdh1	0.348271	0.187099	0.000964364
chr7	CGI19644	127647780	127648336	Abca16	0.131254	0.0384206	0.00110139
chr17	CGI9617	87524575	87525138	Socs5	0.320013	0.109389	0.00137645
chr5	CGI15904	66417254	66418609	Rbm47	0.339009	0.226189	0.00137645
chrX	CGI23074	166434713	166436290		0.601583	0.538216	0.0015356
chrX	CGI22887	100677316	100677686	Tsix,Xist	0.668438	0.318237	0.00201658
chr13	CGI6126	115756597	115756955	Itga1	0.146039	0.0177527	0.00246943
chr4	CGI15338	149263306	149263660		0.473993	0.0351981	0.00312543
chrX	CGI22723	51078799	51079253	Zfp36l3	0.600518	0.296465	0.00312543
chr9	CGI21482	21992322	21993147	Zfp872	0.158458	0.0556869	0.0039257
chr4	CGI14036	11327122	11327550		0.287833	0.0416667	0.00420884
chr2	CGI12406	150325996	150326762		0.126757	0.0438123	0.00425171
chr19	CGI10881	44055152	44055612	Cpn1	0.24983	0.0841046	0.00425446
chr14	CGI6282	31943524	31945096		0.0174739	0.00093412	0.00505257
chr12	CGI4432	13443755	13444177	Nbas	0.546267	0.323053	0.0059619
chr2	CGI11880	87366058	87366480		0.122856	0.0135468	0.00734521
chr11	CGI3894	101845405	101846603	Dusp3	0.0119589	0	0.00806116
chr12	CGI4685	70188487	70189056		0.168621	0.0432315	0.00921338
chr4	CGI14294	52451656	52452630	2700081L22Rik,Smc2	0.0453588	0.00653732	0.00921338
chr5	CGI16448	119823910	119824340		0.317958	0.134283	0.00921338
chr11	CGI2579	9050283	9050777		0.522339	0.226614	0.0103091
chr6	CGI17356	47854400	47855657	Zfp282	0.0370264	0.00807373	0.0107864
chr15	CGI7087	52309680	52310043		0.501922	0.263795	0.0110542
chr9	CGI22129	89848670	89849082	Rasgrf1	0.2533	0.107143	0.0116113
chr10	CGI2213	115834643	115835077		0.154793	0.0215686	0.0116475
chr17	CGI9408	63172189	63172619	Efna5	0.360672	0.101926	0.0118048
chrX	CGI23073	166433733	166434397		0.603204	0.428259	0.0118048
chr3	CGI13060	32547494	32547917		0.298126	0.0822591	0.011983
chr1	CGI1073	178655035	178655520		0.420797	0.176048	0.012101
chr11	CGI3393	81386852	81387253	1700071K01Rik,Accn1	0.720389	0.35637	0.0122417
chr12	CGI4790	78243974	78244350		0.387957	0.117731	0.0132241
chr1	CGI338	66862726	66864912	Kansl1l	0.0122457	0.00107585	0.0140896
chr1	CGI727	134256973	134257722	Tmcc2	0.282548	0.170326	0.0148995
chr13	CGI5261	8931115	8931698		0.539374	0.177196	0.0148995
chrX	CGI23067	166426425	166427613	Mid1	0.712002	0.63451	0.0148995
chr5	CGI15566	21181043	21182006	Napepld	0.254933	0.142428	0.0152562
chr11	CGI2826	50677847	50678312	Grm6	0.291318	0.116291	0.0164322
chr2	CGI12619	162724997	162725439		0.481614	0.197996	0.0167787
chr9	CGI22267	106364717	106365077	Pcbp4	0.254379	0.0446047	0.0167787
chr10	CGI1653	62884306	62884659		0.522934	0.20124	0.0189579
chr5	CGI16002	77431654	77432188		0.370624	0.16074	0.0191376
chr4	CGI15439	153708638	153709527	Prdm16	0.127781	0.0552953	0.0204672
chr10	CGI1633	62127726	62128156	Stox1	0.0852312	0.0340195	0.0206679
chr2	CGI12455	152459984	152460669	Rem1	0.160359	0.0840595	0.0214902
chr16	CGI8315	52198273	52198909	Cblb	0.341259	0.204682	0.022365
chr19	CGI10766	34548626	34549716	Ch25h	0.030289	0.00404224	0.0229498
chr13	CGI6011	99406570	99407363	Tmem174	0.228488	0.0789542	0.0232684
chr11	CGI3592	95372164	95372694	Nxph3	0.201873	0.0719621	0.024044
chr11	CGI3798	99279131	99279697	Krt12	0.162667	0.0570482	0.0240749
chr12	CGI5077	109479022	109479547	Ccdc85c	0.231885	0.0685046	0.0242486
chrX	CGI22722	51059809	51060397	1700013H16Rik	0.863492	0.663135	0.0242486
chr9	CGI22444	115863969	115864472	Gadl1	0.332326	0.148037	0.0244404
chr5	CGI16341	115373342	115373718	Oasl1	0.180911	0.081027	0.024443
chr17	CGI8903	29046123	29046859	4930539E08Rik	0.0287386	0	0.0246776
chr7	CGI18348	16557189	16558188	Gltscr1	0.152336	0.0622754	0.0249879
chr4	CGI15222	140937972	140938899	Fam131c	0.0734414	0.0183463	0.0253099
chr17	CGI8608	10582210	10582827		0.370362	0.135179	0.0263939
chr7	CGI18880	36959835	36960321		0.230159	0.026704	0.0263939
chr16	CGI8473	92605677	92606580	Runx1	0.0442555	0.00703297	0.0264302
chr10	CGI2233	117031013	117031474		0.292043	0.112919	0.02722
chr16	CGI8354	64240729	64241106		0.515789	0.0277778	0.02722
chr13	CGI5639	54604518	54606036	4732471D19Rik	0.0118296	0.0013029	0.0278194
chr9	CGI22298	107500881	107501716	Sema3b	0.112873	0.043121	0.0294433
chr13	CGI5880	76521163	76522943	Mctp1	0.0142038	0.0012605	0.0302249
chr7	CGI19794	135830870	135832249	Inpp5f	0.391006	0.303647	0.0302249
chr2	CGI12541	155890688	155892117	Spag4	0.0228751	0.00448029	0.0304873
chr2	CGI11158	4524336	4525461	Frmd4a	0.161674	0.0559409	0.0307136
chr10	CGI1675	67383296	67384111		0.312428	0.181325	0.0313718
chr1	CGI212	43089015	43090056	Gpr45	0.26985	0.180523	0.0319948
chr2	CGI12812	170613853	170614253	Dok5	0.616779	0.352583	0.0319948
chr5	CGI17073	149114913	149115303	Mtus2	0.284053	0.103527	0.0330803
chr19	CGI11049	52638331	52638953		0.714052	0.0395257	0.034272
chr5	CGI16014	77891638	77892062		0.397399	0.129145	0.0351696
chr16	CGI8285	44299561	44300017	Sidt1	0.191892	0.0389159	0.0360925
chr11	CGI4082	113689566	113689964	Sdk2	0.0920179	0.0178558	0.0388058
chr6	CGI17255	30351422	30352534	Klhdc10	0.0185417	0.00299224	0.0388058
chr17	CGI8563	5886904	5887261	Snx9	0.585891	0.113615	0.0399911
chr4	CGI14917	129713997	129714583		0.0826126	0.00881834	0.0409225
chr2	CGI11994	104311354	104311707	Hipk3	0.3204	0.119013	0.0413989
chr13	CGI5423	32867940	32868417	Mylk4	0.315189	0.106832	0.0419088
chr11	CGI4060	109496520	109497051		0.206851	0.0932631	0.042148
chr19	CGI10824	41162902	41163365	Tll2	0.0504987	0.00604575	0.0423708
chr2	CGI11846	79536089	79536465		0.296627	0.0928451	0.0423708
chrX	CGI23068	166427775	166428554	Mid1	0.650823	0.576231	0.0423708
chr17	CGI9036	34348679	34349105	Tap2	0.0650117	0.00347222	0.0440337
chr5	CGI16459	120132491	120133175	Tbx3	0.0451595	0	0.0448993
chr12	CGI4720	72237099	72237878	2700049A03Rik,Timm9	0.029745	0.00690476	0.0458896
chrX	CGI23066	166424453	166425902	Mid1	0.637036	0.558067	0.0459078
chr6	CGI17467	54893112	54893487	Nod1	0.151614	0.0296895	0.04662
chr5	CGI16233	111057122	111057575		0.138373	0.0410852	0.0490425
chr6	CGI17349	47600593	47601718		0.0201679	0.00135685	0.0490425

## Sheet: E10.5_fgPMR
List of fgPMRs at E10.5
Chromosome	ID	Start	End	Symbol	CGI methylation level		U-test
					10.5mPGC	10.5fPGC	P-value
chr17	CGI9159	39979832	39985876	Rn45s	0.102302	0.13377	0
chrX	CGI22568	7150261	7151954	4930524L23Rik,Ppp1r3f	0.00572917	0.0755569	0
chrX	CGI22581	7418131	7420257	Otud5	0.00722791	0.0518028	0
chrX	CGI22635	13062926	13064268	Nyx	0.0969476	0.23336	0
chrX	CGI22636	13422617	13424367	Cask	0.00425745	0.0716013	0
chrX	CGI22642	19636457	19638474	Chst7	0.00652958	0.0995135	0
chrX	CGI22660	33868254	33869798	Lonrf3	0.00223214	0.0898647	0
chrX	CGI22662	34137766	34138876	Pgrmc1	0.00378788	0.107507	0
chrX	CGI22675	34730811	34732197	Ndufa1,Rnf113a1	0.00501618	0.0597476	0
chrX	CGI22712	48557775	48559534	Mbnl3	0.00555556	0.0814528	0
chrX	CGI22713	49032965	49034845	Hs6st2	0.0109026	0.0646426	0
chrX	CGI22744	58144877	58148028	Sox3	0.0109019	0.0577381	0
chrX	CGI22757	68808684	68810606	Hmgb3	0.00452493	0.0515374	0
chrX	CGI22829	91367463	91369150	Zfx	0.00231272	0.0438161	0
chrX	CGI22848	96132064	96133933	Yipf6	0.00196875	0.0631904	0
chrX	CGI22850	96330929	96332683	Efnb1	0.00301142	0.119082	0
chrX	CGI22854	97014940	97017264	Tmem28	0.0125458	0.0659012	0
chrX	CGI22882	100128881	100129939	Gm5126	0.00183824	0.145736	0
chrX	CGI22895	101394843	101396965	C77370	0.0030042	0.120436	0
chrX	CGI22909	103414515	103415487	Taf9b	0.00425532	0.110987	0
chrX	CGI22934	130220526	130223721	Pcdh19	0.00612365	0.0601358	0
chrX	CGI22959	133652678	133655046	Esx1	0.00717751	0.0655677	0
chrX	CGI22972	137132710	137135292	Tsc22d3	0.00829082	0.0540504	0
chrX	CGI22975	138158492	138159784	Irs4	0.000999001	0.0710524	0
chrX	CGI23034	158345903	158347424	Nhs	0.00535475	0.0930765	0
chrX	CGI22678	35542583	35543707	Zbtb33	0.00759286	0.0725474	8.16e-07
chrX	CGI22717	50264926	50265934	Phf6	0.00384921	0.112443	8.16e-07
chrX	CGI22920	109713935	109715705	Zfp711	0.00409091	0.0495556	8.16e-07
chrX	CGI22566	6951978	6953575	Gm14379,Usp27x	0.0114394	0.0737773	1.428e-06
chrX	CGI22714	49517340	49518842	Gpc4	0.00902778	0.0689507	1.428e-06
chrX	CGI23023	155851974	155853743	Mtap7d2	0.00611888	0.0390909	1.428e-06
chrX	CGI23055	165111091	165112547	Msl3	0.00125	0.0488832	1.428e-06
chrX	CGI23026	156425851	156426963	Map3k15	0.0130159	0.0952889	2.016e-06
chrX	CGI22689	45386861	45388113	Apln	0.00314153	0.0721284	3.08757e-06
chrX	CGI22698	45805966	45807947	Elf4	0.0106667	0.0449913	3.08757e-06
chrX	CGI23033	158154566	158155974	Rai2	0.00484568	0.0655416	3.08757e-06
chrX	CGI23042	160346292	160347760	Ap1s2	0.0068525	0.0369008	4.10092e-06
chrX	CGI22976	138740031	138740707	Kcne1l	0.0065331	0.134995	4.5696e-06
chrX	CGI23020	154480157	154481995	Cnksr2	0	0.035311	5.57268e-06
chrX	CGI23037	159197755	159199463	Rbbp7	0.0037714	0.0438644	6.528e-06
chrX	CGI22644	20002185	20003697		0.00676207	0.0502304	1.54091e-05
chrX	CGI22758	68916899	68918195	Gpr50	0.00458937	0.0661376	1.66167e-05
chrX	CGI22979	139400242	139401847	Ammecr1	0.0037234	0.0605902	1.87861e-05
chrX	CGI22918	109007906	109009314		0.00178571	0.0374483	2.68216e-05
chrX	CGI22817	83021569	83022693	Gyk	0	0.0946216	3.0626e-05
chrX	CGI22565	6895595	6896730	Clcn5	0.0025641	0.0397853	3.6652e-05
chrX	CGI22592	7722264	7723080	2900002K06Rik,Rbm3	0	0.0708175	3.9168e-05
chrX	CGI22967	136405257	136406430	Morc4	0.00827408	0.074899	4.15834e-05
chrX	CGI22739	56819935	56821556		0.0116261	0.0527477	4.3904e-05
chrX	CGI22790	71491042	71492033	Flna	0.00265523	0.0472642	4.78929e-05
chrX	CGI22741	57656347	57658282	Atp11c	0.00715962	0.0355136	4.91448e-05
chrX	CGI22905	103123532	103124899	Atrx	0.00422705	0.0635002	6.43129e-05
chrX	CGI23018	154036029	154036968	Mbtps2	0.00555556	0.048593	6.60515e-05
chrX	CGI22665	34335512	34336871	Slc25a5	0.00300728	0.0511597	6.8952e-05
chr3	CGI12980	10087685	10088424	Gm9833	0.0293132	0.19834	8.69827e-05
chrX	CGI22843	93151824	93152546	Las1l	0.0109091	0.112299	0.000130785
chrX	CGI22598	8776764	8778172	Lancl3	0.00839855	0.0458694	0.000132054
chrX	CGI22605	10295009	10295925	Mid1ip1	0.00186567	0.0485638	0.000197392
chrX	CGI23048	162676648	162677541	Gpm6b	0.0106367	0.0859654	0.000284886
chr2	CGI12783	168760430	168761216	Zfp64	0.125296	0.255232	0.000332681
chrX	CGI22969	136596505	136597382	Nup62cl	0.0120851	0.0933403	0.000347835
chr7	CGI18345	16542709	16543386	Ehd2	0.0759252	0.246991	0.00034944
chrX	CGI22715	49966449	49967712	A630012P03Rik,Gpc3	0.00811688	0.0765371	0.00043047
chrX	CGI23010	149932285	149933956	Ubqln2	0.0124451	0.05012	0.000633216
chrX	CGI22949	132420335	132420964	Bhlhb9	0.0146998	0.10617	0.000646824
chrX	CGI22971	136991024	136991923	Prps1	0.0188889	0.0880643	0.000688613
chrX	CGI22818	83436925	83438199	Nr0b1	0.00855856	0.0378584	0.0006917
chrX	CGI23021	155693168	155694570	Rps6ka3	0.0021097	0.0383928	0.000805855
chrX	CGI22705	46823577	46824181	Arhgap36	0	0.0729299	0.000828621
chrX	CGI22893	101016482	101017441	Slc16a2	0.00185185	0.0991244	0.000841768
chrX	CGI22954	133275935	133276884	Morf4l2	0	0.0735017	0.00123495
chrX	CGI22663	34184672	34185589	Akap17b	0	0.0512233	0.00130805
chrX	CGI22861	97972244	97972925	Dlg3	0	0.0766144	0.00149751
chrX	CGI22875	99044566	99045845	Nhsl2	0.00748588	0.0412069	0.00153408
chr10	CGI1334	18251016	18251864	Nhsl1	0.0407461	0.15545	0.0015356
chr7	CGI19981	150644654	150647677	Cdkn1c	0.0694501	0.116835	0.00154158
chrX	CGI22932	126284013	126285136	Diap2	0.00526316	0.0349155	0.00167465
chrX	CGI23053	163819579	163820741	Prps2	0.00948596	0.060331	0.00185865
chrX	CGI22792	71499735	71500714	Emd	0.0125205	0.057765	0.00197001
chrX	CGI23025	156064503	156066032	Sh3kbp1	0	0.0309814	0.00199355
chrX	CGI22671	34588290	34589985	Sowahd	0.0104189	0.0512983	0.00202229
chrX	CGI22849	96237839	96238573	Stard8	0.00747863	0.0720378	0.00202229
chr5	CGI16704	131557316	131557836	Wbscr17	0.0544294	0.203566	0.00225386
chrX	CGI22989	147481143	147482693	Fgd1	0.011219	0.0423337	0.00225386
chrX	CGI22589	7650895	7652073	Suv39h1	0.00580694	0.0415544	0.0022636
chrX	CGI22810	74755923	74757460	Tbl1x	0	0.0296015	0.002448
chr7	CGI19286	86040459	86041379	Aen	0.00517254	0.0406813	0.00253613
chrX	CGI22902	102347310	102347661		0.00324675	0.115022	0.00296345
chrX	CGI22603	10227576	10227952		0.11769	0.301592	0.0029792
chr16	CGI7960	11144054	11144624	Zc3h7a	0.0690104	0.108979	0.00306119
chrX	CGI22765	70473379	70474724	F8a	0.0256	0.0560809	0.00312543
chrX	CGI22940	131075609	131076608	Timm8a1	0.00213675	0.0507736	0.00318164
chrX	CGI23029	156939758	156940914	Phka2	0.00252525	0.0280914	0.00351182
chr14	CGI6593	63174069	63175320	Fam124a	0.00153941	0.0253686	0.00377306
chrX	CGI22710	48194274	48195277	2610018G03Rik	0.00682753	0.0840912	0.00397267
chrX	CGI22841	92639645	92640459	Fam123b	0	0.0652552	0.0040392
chr6	CGI17855	113698243	113699035	Atp2b2	0.0097561	0.045252	0.00420884
chrX	CGI22582	7455055	7456102	Pim2	0.00402414	0.0401007	0.00431573
chrX	CGI22772	70882443	70883005		0.0107527	0.0600579	0.00445342
chr16	CGI8456	91561707	91562212	Ifngr2	0.0975108	0.24007	0.00455056
chrX	CGI22990	147530523	147531296	Tsr2	0.0228175	0.079584	0.00455056
chrX	CGI22964	135975515	135975880		0.177778	0.395238	0.0045696
chrX	CGI22957	133572433	133573081	Mcart6	0.0161458	0.121148	0.00505257
chrX	CGI22777	70961320	70962057	Abcd1,Bcap31	0.018254	0.0490674	0.00510395
chrX	CGI22915	108009578	108010437	Pou3f4	0	0.0376536	0.00559319
chr8	CGI20863	97600011	97600421	Ccdc135	0.0515606	0.237242	0.00574827
chrX	CGI22732	54306217	54307407	Htatsf1	0.0217982	0.0733343	0.00581095
chrX	CGI22824	91076864	91077877	Pdk3	0.00698294	0.0501809	0.0060928
chrX	CGI22760	69207387	69208572	Prrg3	0.00530303	0.0598204	0.00637986
chrX	CGI23016	153929079	153930379	Sms	0.0101999	0.0490473	0.00641837
chrX	CGI22666	34347691	34348294		0.00292398	0.0699519	0.00643898
chr18	CGI9936	37881409	37882496	Pcdha4-g,Pcdhga1,Pcdhga2,Pcdhga3,Pcdhga4,Pcdhga5,Pcdhga6,Pcdhga7,Pcdhgb1,Pcdhgb2,Pcdhgb4	0.0496025	0.131122	0.006528
chrX	CGI22970	136811844	136813354		0.0122334	0.0422268	0.00734521
chrX	CGI22834	91786508	91787783	Maged1	0.00431034	0.0452381	0.0077448
chrX	CGI22796	71558066	71559015	Fam50a	0.0151961	0.0626647	0.00796369
chrX	CGI22801	71673963	71674723	G6pdx,Ikbkg	0.00641026	0.0818474	0.00796369
chr7	CGI18927	50005245	50005617		0.0212121	0.139666	0.0079887
chrX	CGI22578	7327503	7328259		0	0.0441494	0.0079887
chrX	CGI22707	46846732	46847612	Arhgap36	0.00387597	0.0617981	0.0079887
chrX	CGI22736	55284082	55285541	Zic3	0.0153262	0.044598	0.00824445
chrX	CGI22759	69061627	69062602	Vma21	0.0126984	0.0582902	0.00828831
chrX	CGI22901	102315463	102317321	Magee1	0.00220459	0.0213561	0.00828831
chr6	CGI17716	90182614	90182970		0.127459	0.290873	0.00836206
chrX	CGI22864	98449401	98450629	Foxo4	0.00462963	0.0375668	0.00836206
chr15	CGI6958	12304743	12305433	Pdzd2	0.0513675	0.142986	0.00859888
chr9	CGI22465	118984797	118985598	Plcd1	0.0840516	0.196834	0.00870984
chr8	CGI21010	111479797	111481077	Zfhx3	0.111739	0.229437	0.00916966
chrX	CGI22682	35988011	35988739	C1galt1c1	0.019086	0.11647	0.00921338
chrX	CGI23006	149441457	149442338	Usp51	0.00226757	0.0527337	0.00975831
chr1	CGI1065	176766797	176767449	Grem2	0.363486	0.523181	0.00976898
chr4	CGI14842	126910640	126911338	Dlgap3	0.0578723	0.136744	0.0098767
chrX	CGI22899	102052024	102052760	Magee2	0.0176871	0.0759513	0.0098767
chrX	CGI22674	34666836	34667551	Nkap	0.0040404	0.0470938	0.00988176
chrX	CGI22788	71268540	71269808	Irak1,Mir5132,Mir718	0.0135344	0.0422544	0.00988176
chrX	CGI22664	34283564	34283919	Slc25a43	0	0.0408484	0.0100363
chrX	CGI22703	45976662	45977196	Slc25a14	0.00670498	0.0744561	0.0100363
chrX	CGI22743	57800173	57801831	Gm715	0.00987267	0.0433344	0.0100363
chr7	CGI18327	13556000	13557041	Zfp324	0.129391	0.231313	0.0102119
chr15	CGI7292	78374558	78374947	Sstr3	0.0229324	0.150103	0.0103091
chr17	CGI8834	27256067	27256459	Itpr3	0.0934833	0.264215	0.0103965
chrX	CGI22630	12513896	12514482		0.0047123	0.0462148	0.0103965
chrX	CGI22904	102959471	102960753	Fgf16	0.00555861	0.0314437	0.0103965
chr19	CGI11024	47314793	47315232	Neurl1a	0.0477801	0.165629	0.0104887
chrX	CGI22894	101175892	101176841	Rlim	0.00111111	0.0379133	0.0104887
chr12	CGI4618	56521086	56521933		0.141209	0.247117	0.0110903
chr8	CGI20141	20019723	20020548	2610005L07Rik,6820431F20Rik	0.00889582	0.0461377	0.0110903
chrX	CGI22650	20497357	20498449	Syn1	0.0122286	0.0430207	0.0110903
chrX	CGI22993	147954765	147956100	Phf8	0.0137057	0.0509812	0.0110903
chrX	CGI22995	148237363	148238653	Huwe1	0.0190476	0.0565936	0.0110903
chr9	CGI21671	44523198	44524293	Phldb1	0.0798322	0.151702	0.011156
chr17	CGI9364	56649713	56652189	Znrf4	0.0273369	0.0527446	0.0113225
chrX	CGI22558	5044911	5045962	Mycs	0.0111263	0.0486219	0.0114114
chrX	CGI22880	99445479	99447826	Cited1	0.0100187	0.0234025	0.0114114
chr7	CGI19334	87531558	87532424	Fes	0.0092063	0.0610923	0.0118761
chrX	CGI22941	131119841	131120687	Rpl36a	0.0118236	0.0783916	0.0122733
chrX	CGI23036	159081041	159082017	Reps2	0	0.0300576	0.0123998
chrX	CGI23007	149471667	149472322	9530051G07Rik,Mageh1	0	0.0424669	0.012525
chr10	CGI1323	17353751	17354182		0.15555	0.365101	0.0126842
chrX	CGI22812	75828875	75829278	Prrg1	0.008	0.0801192	0.0127246
chr12	CGI5033	105831533	105832121		0.0943674	0.238397	0.0130941
chrX	CGI23027	156575644	156576642	Pdha1	0.0123698	0.0426023	0.0130941
chr7	CGI18357	16730018	16731052	Slc8a2	0.0817995	0.165846	0.0133184
chr12	CGI4722	72418902	72419999	Dact1	0.186137	0.277598	0.0134232
chrX	CGI23050	162916969	162917783	Rab9	0.00462963	0.0580417	0.0137884
chr8	CGI20923	107816996	107817780	Exoc3l	0.041346	0.102495	0.0139803
chr18	CGI9884	37113397	37114776	Pcdha1,Pcdha2,Pcdha3,Pcdha4,Pcdha4-g	0.0866888	0.158282	0.0140896
chrX	CGI22896	101608621	101609420	Abcb7	0	0.0269619	0.0146004
chr3	CGI12951	5860525	5860930		0.0733061	0.0976774	0.0148995
chr7	CGI18834	31888157	31888773	Hpn	0.042874	0.151251	0.0148995
chr8	CGI20883	98349130	98349506		0	0.0797111	0.0148995
chrX	CGI22586	7499030	7499975	Pcsk1n	0.00911458	0.0361818	0.0148995
chrX	CGI23051	162948023	162948921	Tceanc	0.0074124	0.058666	0.0148995
chrX	CGI22851	96411717	96412784		0.0045066	0.0344701	0.0149259
chrX	CGI22965	136144798	136145939	Rnf128	0.00599817	0.0362859	0.0151434
chr11	CGI3933	102526325	102527900	Gm1564	0.088882	0.145519	0.015225
chr7	CGI18941	50930311	50931282	Ctu1	0.113853	0.206911	0.015225
chr6	CGI18070	134198210	134198953	Etv6	0.198862	0.370078	0.0152562
chrX	CGI22787	71211699	71213313		0.0140333	0.0375874	0.0152562
chr2	CGI11915	91767957	91769020	Chrm4	0.0447639	0.105606	0.0157248
chrX	CGI22917	108576093	108577345	Rps6ka6	0.00529101	0.0453641	0.0159421
chrX	CGI22649	20425607	20426086	Araf	0	0.0560916	0.0162907
chrX	CGI22776	70918008	70919816	Slc6a8	0.00438957	0.0397501	0.0167787
chrX	CGI22961	135448531	135449487	Nrk	0.00314465	0.052961	0.0179377
chrX	CGI22856	97170718	97171531	Eda	0.0181013	0.0943328	0.0186675
chrX	CGI22980	139828321	139828768	Chrdl1	0	0.0494414	0.0188645
chr10	CGI1713	74108166	74108853	Pcdh15	0.127316	0.287068	0.0189579
chrX	CGI22811	75040521	75041728	Prkx	0.00246548	0.0399927	0.0190727
chrX	CGI22734	54756441	54757221	Gpr101	0.0189189	0.0898688	0.0200285
chrX	CGI22687	42142237	42143564	Dcaf12l1	0.0316523	0.0820114	0.0204664
chr18	CGI9698	10051908	10052693		0.0901663	0.197359	0.0204672
chr1	CGI576	93302332	93302868	1700020N18Rik	0.00954545	0.0797912	0.0206679
chrX	CGI22704	46048033	46048686	Rbmx2	0	0.0457918	0.0207718
chrX	CGI22779	71031863	71032966	Idh3g,Ssr4	0.00464345	0.038901	0.0214902
chrX	CGI22789	71329942	71331305	Mecp2	0.00246305	0.0355653	0.0214902
chr11	CGI2947	58795400	58795767	Trim11	0.00555556	0.121291	0.0215517
chr13	CGI6097	113441941	113442916	Ddx4	0.159225	0.260536	0.0229678
chr9	CGI22123	89496232	89496842	AF529169	0.13973	0.253227	0.0230682
chrX	CGI22563	5976687	5978147	Shroom4	0.0134146	0.037128	0.023294
chrX	CGI22973	137198985	137200452		0.00466853	0.0367682	0.0235371
chr19	CGI10572	8845239	8846039	Nxf1,Tmem223	0.0113957	0.0661754	0.0238775
chrX	CGI22958	133583734	133584699	Fam199x	0.0026455	0.0265525	0.024044
chrX	CGI23057	165233866	165234840	Arhgap6	0.00922865	0.0455555	0.024044
chrX	CGI22711	48370960	48372354	Rap2c	0.01522	0.0515308	0.0242486
chrX	CGI22881	99839032	99839810	Phka1	0	0.0355969	0.0242486
chrX	CGI22755	68617607	68618582	Mtmr1	0.0164539	0.0671861	0.0242607
chrX	CGI22735	55283329	55284066	Zic3	0.00854037	0.0379527	0.0244291
chrX	CGI22863	98417418	98418230	Snx12	0.00970696	0.0441695	0.0249879
chr3	CGI13177	54589839	54590425	Smad9	0.136467	0.31421	0.0253099
chrX	CGI22659	33651740	33652664	Il13ra1	0.0101695	0.0440693	0.0253099
chrX	CGI23059	165757629	165758962	Hccs	0.0109924	0.0333527	0.0254688
chr15	CGI7479	85367529	85368366	Wnt7b	0.151715	0.273227	0.0255596
chrX	CGI22599	8849441	8850624	Xk	0.00462963	0.0311538	0.0255664
chr14	CGI6468	55250806	55251549	Cdh24	0.0936679	0.195969	0.0257975
chrX	CGI22816	82818898	82820002	Tab3	0.0108835	0.046672	0.0259027
chr15	CGI7882	103085382	103086029	Nfe2	0.0038961	0.0347398	0.0259659
chr14	CGI6536	57655005	57655917	Gja3	0.094684	0.176574	0.0264988
chr1	CGI1150	184678694	184679255	4922505E12Rik	0.160872	0.274399	0.0268686
chrX	CGI22857	97171566	97172036	Eda	0	0.0667277	0.0268686
chr16	CGI8387	85079971	85080641	App	0.17289	0.303909	0.0268725
chr17	CGI8954	31928451	31929077		0.138371	0.288924	0.0268725
chr1	CGI616	98160734	98161213		0.0458333	0.528889	0.0270261
chr2	CGI12444	152165366	152165739	Trib3	0.131781	0.276278	0.02722
chrX	CGI22823	90877216	90877835	Pola1	0.0237225	0.046863	0.0305389
chrX	CGI22753	68302823	68303662	Mamld1	0.0017094	0.0782313	0.0320634
chr3	CGI13228	65197122	65197496		0.139689	0.390777	0.0333944
chrX	CGI22884	100517081	100517612	Cdx4	0	0.0448632	0.034272
chrX	CGI22974	138156046	138156734	Irs4	0.00966184	0.0325868	0.0344068
chr4	CGI15166	138901592	138902255		0.0183724	0.0631905	0.0351696
chr7	CGI18625	27949543	27949941	Egln2	0.0412227	0.165017	0.0351696
chrX	CGI22684	39501838	39503871	Stag2	0.00802237	0.0262102	0.0352776
chr10	CGI1678	67560095	67560703	Arid5b	0.186953	0.287921	0.0364025
chrX	CGI22738	56386927	56388115	Fgf13	0.00680272	0.0291453	0.0378926
chrX	CGI22819	90531706	90532062	Arx	0	0.0750319	0.0378926
chrX	CGI22951	132673802	132674338	Bex4	0.00892857	0.254984	0.0380485
chrX	CGI22658	33428442	33429622	Dock11	0.0117284	0.0302657	0.0380582
chr11	CGI3052	64815191	64815615	Arhgap44,Elac2	0.0543426	0.237396	0.0384005
chrX	CGI22683	39264123	39265343	Thoc2	0.00765766	0.0347846	0.0384019
chrX	CGI23024	155970281	155971687	A830080D01Rik	0.0181673	0.0479429	0.0398269
chrX	CGI22860	97962895	97963952	Dlg3	0.0037594	0.0491691	0.0399164
chrX	CGI22982	143397105	143397869	Htr2c	0.0020202	0.0403502	0.0406666
chrX	CGI22981	140752231	140753818	Alg13	0.00245098	0.0283886	0.0408302
chr5	CGI16190	108259004	108259506	Evi5,Ube2d2b	0.169767	0.352332	0.0411474
chr2	CGI11285	24534284	24535162	Cacna1b	0.0461837	0.088013	0.0418486
chrX	CGI23038	159266427	159267714	Txlng	0.0021322	0.0295519	0.0418486
chr13	CGI5670	55521383	55522980	F12	0.0220743	0.0511649	0.0422757
chr5	CGI17045	148019222	148019997		0.0829573	0.200083	0.0423708
chr14	CGI6817	104083475	104084020	Slain1	0.26639	0.447703	0.0425283
chrX	CGI22669	34442321	34443668	Nkrf	0.0092803	0.0552516	0.0425283
chrX	CGI23014	152057101	152058814	Ptchd1	0.00490956	0.0212077	0.0425283
chrX	CGI22567	6999677	7000106	2010204K13Rik	0	0.0949179	0.0428618
chrX	CGI22654	20937818	20938317	Gm5124	0	0.0602515	0.0428618
chrX	CGI22632	12647941	12650313	Usp9x	0.00604288	0.0190364	0.0432575
chr5	CGI16476	120332890	120333576	Tbx5	0.160961	0.317882	0.0440337
chrX	CGI22799	71618308	71618728	Slc10a3	0.00899101	0.0552804	0.0440337
chrX	CGI22701	45872304	45873028	Rab33a	0	0.0334256	0.0448772
chr13	CGI5558	48182040	48182488		0.116798	0.272212	0.0453228
chrX	CGI22670	34529265	34529862	Sept6	0	0.053503	0.0453228
chrX	CGI22656	23269749	23270718	Wdr44	0.0026455	0.0280081	0.0454284
chr5	CGI16723	135034273	135034861	Syna	0.145945	0.268575	0.0454747
chr1	CGI504	88284036	88284696	Nmur1	0.127042	0.261949	0.0455272
chr9	CGI22336	108295089	108295620	1700102P08Rik	0.0602136	0.155951	0.0456183
chrX	CGI22724	51277689	51278264		0.0123114	0.0866746	0.0459078
chr11	CGI2669	29030473	29031174	Pnpt1	0.00158983	0.0399136	0.04662
chr11	CGI3848	101001480	101002065		0.0319497	0.127892	0.04662
chr18	CGI10124	62113115	62113468	Sh3tc2	0.137695	0.346285	0.04662
chr9	CGI21782	55089881	55090240	Nrg4	0.0208333	0.102799	0.04662
chr7	CGI19227	74573729	74574222		0.154189	0.367757	0.0472676
chrX	CGI22962	135744304	135744933	Mum1l1	0.00714286	0.0451617	0.0474773
chr11	CGI4168	116007690	116008084	Fbf1	0.0164835	0.116142	0.0482758
chrX	CGI22591	7709263	7709811	Wdr13	0.003663	0.0675885	0.0490425
chrX	CGI22997	148450679	148451761	Ribc1,Smc1a	0.00630037	0.029542	0.0490425
chrX	CGI22604	10294220	10294888	Mid1ip1	0	0.0330767	0.0494173

## Sheet: E13.5_mgPMR
List of mgPMRs at E13.5
Chromosome	ID	Start	End	Symbol	CGI methylation level		U-test
					13.5mPGC	13.5fPGC	P-value
chrX	CGI23074	166434713	166436290		0.626041	0.435611	0
chr13	CGI5776	64271003	64271573	Habp4	0.0967098	0.00848839	4.25708e-05
chr2	CGI11158	4524336	4525461	Frmd4a	0.0460576	0.00640394	0.000227331
chr12	CGI4603	54936792	54937439	Npas3	0.129198	0.00480769	0.00028275
chr2	CGI11520	32470443	32470828	St6galnac6	0.0615023	0.00294118	0.00207821
chr9	CGI22324	108008334	108009250	Bsn	0.0414612	0.00740076	0.00207821
chr15	CGI7523	88897826	88899338	Panx2	0.0273833	0.00465195	0.00207821
chr5	CGI16067	93370405	93372329	Shroom3	0.0366392	0.0134225	0.00529308
chr9	CGI22248	105721289	105722097	Col6a6	0.0680122	0.00240385	0.00539649
chr8	CGI21291	128458676	128459226	BC021891	0.0545114	0.00547667	0.0065598
chr7	CGI18464	19878343	19878852	Rtn2	0.0675302	0	0.0065946
chr10	CGI2270	120125371	120125953		0.0646242	0	0.0065946
chr13	CGI6011	99406570	99407363	Tmem174	0.0714686	0.00230415	0.00806241
chr9	CGI21600	40580372	40581088	Clmp	0.0883404	0.0017301	0.00806241
chr11	CGI3029	62478116	62478726	Mmgt2	0.0383963	0.00545986	0.0085956
chr9	CGI22233	103132367	103132868	Trf	0.0956956	0.0034965	0.0085956
chr5	CGI16749	135825350	135826272	Fkbp6	0.046467	0.0108628	0.0088291
chr4	CGI14861	128444091	128444973	A3galt2	0.0662026	0.00613673	0.0110358
chr12	CGI4572	41570659	41571242	Dock4	0.060172	0	0.0122714
chr8	CGI21309	129511903	129512327		0.0754649	0.0106769	0.0122714
chr14	CGI6718	72785265	72785779		0.114927	0.00192308	0.0122714
chr5	CGI15634	27068491	27068951		0.167942	0	0.0122714
chr3	CGI13863	136565747	136566224	Ppp3ca	0.051081	0	0.0122714
chr7	CGI18357	16730018	16731052	Slc8a2	0.0424746	0.00333949	0.0125667
chr5	CGI16792	136750390	136751493	Cux1	0.0443477	0.0163527	0.0125667
chr10	CGI1616	61215756	61216377	H2afy2	0.154416	0.0150206	0.0125667
chr3	CGI13441	89564501	89565408	Chrnb2	0.0441234	0.00731536	0.0128344
chr4	CGI15338	149263306	149263660		0.278846	0.0164835	0.0129463
chr7	CGI18974	51794057	51794961	Pold1	0.0315987	0.00122399	0.0151743
chr9	CGI21694	45575967	45576963	Cep164	0.0407412	0.00286944	0.0154185
chr6	CGI17792	100732874	100733414	Gxylt2	0.0545293	0.00289855	0.016791
chr3	CGI13027	28590177	28590543		0.180722	0.0042735	0.0169231
chr2	CGI11320	25296687	25297084	Abca2	0.0539836	0.00554017	0.0169231
chr11	CGI3764	98460043	98461045	Gm12	0.0312672	0.0014881	0.021333
chr11	CGI3137	69418093	69419630	Atp1b2	0.018352	0.00294882	0.021333
chr2	CGI11599	37646362	37646815	Crb2	0.0618525	0.0031746	0.021333
chr2	CGI12037	109563524	109564277	Bdnf	0.0584025	0.00614662	0.0223938
chr14	CGI6468	55250806	55251549	Cdh24	0.0392182	0.00735244	0.0225829
chr2	CGI12774	168396160	168397198	Nfatc2	0.0312899	0.00881519	0.0228754
chr15	CGI6958	12304743	12305433	Pdzd2	0.0288127	0	0.0264013
chrX	CGI22742	57736459	57736883		0.282955	0.0504149	0.0268114
chr8	CGI21029	112553780	112554584	Chst4	0.0529831	0.0142941	0.0268162
chr10	CGI1825	79399595	79400431	Arid3a	0.0414014	0	0.0272733
chr4	CGI15025	133628610	133629292	Aim1l	0.0518963	0.00683761	0.0274307
chr3	CGI13253	68524740	68525124		0.0931434	0.00714286	0.0329694
chr9	CGI22393	110736806	110737673	Prss45	0.0405901	0.00137741	0.033843
chr7	CGI18913	46791816	46792351	Zfp619	0.101495	0.0100313	0.033843
chr11	CGI2826	50677847	50678312	Grm6	0.0587578	0	0.033843
chr6	CGI17915	119868881	119869252	Rad52	0.0806856	0.00786565	0.033843
chr17	CGI9272	47952583	47953128	Mdfi	0.0491061	0.00483092	0.0376236
chr5	CGI16839	138027962	138028408	Tfr2	0.0911372	0.00377493	0.0390478
chr5	CGI16231	110909581	110910971		0.0270693	0.00623707	0.039598
chr8	CGI20289	44381064	44381474	Zfp42	0.0618421	0.002	0.039598
chr17	CGI9294	48684868	48685575		0.0706889	0	0.039598
chr7	CGI19503	108521480	108521891	Arap1	0.0548951	0.00496241	0.039598
chr11	CGI3308	77284452	77285688	Ankrd13b	0.0355371	0.00819811	0.039598
chr1	CGI232	46145483	46146354	Dnahc7b	0.0815668	0.00568182	0.0406917
chr5	CGI16755	135908297	135909050	Hip1	0.114236	0.00862143	0.0406917
chr15	CGI7213	75939297	75939711	Eppk1	0.045576	0	0.0406917
chr8	CGI20884	98372058	98372641	Slc38a7	0.0385423	0.00202429	0.0406917
chr15	CGI7195	75715699	75717008		0.0430087	0.00951859	0.0409065
chr9	CGI21991	69352798	69353196		0.108327	0.00606061	0.0409065
chr1	CGI1246	196445559	196447274	Plxna2	0.0101662	0.000763942	0.0421533
chr8	CGI20666	86525029	86525896	1700067K01Rik	0.0391005	0.00996839	0.042978
chr19	CGI10374	3903982	3904487	Tcirg1	0.0228857	0	0.04429
chr6	CGI17162	12505089	12505692	Thsd7a	0.0461524	0	0.0496994
chr13	CGI5818	70146463	70146828	1700084F23Rik	0.0668364	0	0.0496994
chr9	CGI22299	107502161	107502591	Sema3b	0.0419103	0	0.0496994
chr7	CGI18893	38432993	38433405	Zfp536	0.0639435	0	0.0496994

## Sheet: E13.5_fgPMR
List of fgPMRs at E13.5
Chromosome	ID	Start	End	Symbol	CGI methylation level		U-test
					13.5mPGC	13.5fPGC	P-value
chr18	CGI9727	13131236	13133240	Impact	0.0258705	0.109453	0
chrX	CGI22676	35474163	35475178	Rhox13	0.0455671	0.174514	4.25256e-05
chr2	CGI12856	174120598	174122146	Gnas,Nespas	0.00938088	0.0650951	4.25708e-05
chr12	CGI4462	19709471	19710538		0.0129762	0.0852568	0.000514605
chr19	CGI10361	3205442	3206099		0.00624339	0.0941488	0.000532827
chr6	CGI17126	4696691	4698891	Peg10,Sgce	0.092451	0.192976	0.00096135
chr4	CGI15275	146315748	146316885		0.0232653	0.0792969	0.00207821
chr11	CGI2586	11925322	11927142	Grb10	0.0243874	0.0625571	0.00207821
chr15	CGI7756	100726889	100727359	Scn8a	0.107467	0.403427	0.00207821
chr15	CGI7155	72639707	72641342	Peg13,Trappc9	0.00225471	0.0198278	0.00231522
chr3	CGI13628	102739137	102740273	Sycp1	0.0158934	0.0505289	0.00445257
chr4	CGI15276	146561517	146562050	Gm13152	0.0518398	0.146231	0.00445257
chr14	CGI6422	52054278	52055400		0.0549568	0.157359	0.00605599
chr4	CGI14735	121770787	121771399		0.1254	0.244898	0.0065598
chrX	CGI22560	5659115	5659919	AU022751	0.037113	0.119315	0.00897731
chr13	CGI5437	35008373	35009080	1700026J04Rik	0.00675676	0.040394	0.0122714
chr11	CGI2642	22871787	22873304	Commd1,Zrsr1	0.0205392	0.0601431	0.0122714
chrX	CGI22687	42142237	42143564	Dcaf12l1	0.00162338	0.0329745	0.0125238
chr4	CGI15117	136326687	136327674	Ephb2	0.0127705	0.0567074	0.0125667
chrX	CGI22970	136811844	136813354		0.00136054	0.0231034	0.0160602
chr7	CGI19465	106615976	106616335	Klhl35	0.0078125	0.145833	0.0163662
chrX	CGI22873	98892079	98893889		0.00494505	0.0411007	0.0183428
chr17	CGI8568	6106252	6107655	Tulp4	0.0033664	0.0224527	0.0223938
chr15	CGI6991	29316585	29316995		0.0208333	0.265262	0.024882
chr9	CGI21482	21992322	21993147	Zfp872	0.00634921	0.0421954	0.0258363
chr6	CGI17716	90182614	90182970		0.00333333	0.0592838	0.0264013
chr7	CGI18301	6681989	6683417	Peg3	0.0718045	0.130923	0.0264013
chr8	CGI20021	3482449	3482859	1700019B03Rik	0	0.0484224	0.031291
chr2	CGI11428	30026571	30028090	Endog	0.00272645	0.0272667	0.033843
chr13	CGI6044	101980120	101980501		0.00568182	0.119805	0.039598
chr4	CGI14686	118118619	118119321	Mpl	0	0.0220253	0.039598
chr1	CGI1209	192505884	192506405		0	0.0380563	0.0406917
chr8	CGI20131	15389086	15389605		0.00309598	0.217262	0.0406917
chr18	CGI9776	25636808	25637256	Celf4	0	0.0382973	0.0423717
chr6	CGI17676	87531137	87531986	Prokr1	0.003256	0.0388326	0.0437548
chrX	CGI22813	76102103	76102463		0.301052	0.605916	0.0466062

## Sheet: E16.5_mgPMR
List of mgPMRs at E16.5
Chromosome	ID	Start	End	Symbol	CGI methylation level		U-test
					16.5mPGC	16.5fPGC	P-value
chr17	CGI8840	27571546	27572568	Grm4	0.374052	0.00870003	0
chr4	CGI15232	141034147	141035156	Spen	0.163068	0.00909381	0
chr11	CGI4241	118752327	118753120	Rbfox3	0.212417	0.0102316	5.19363e-11
chr9	CGI22325	108012683	108013922	Bsn	0.15958	0.0030303	5.85832e-11
chr10	CGI1825	79399595	79400431	Arid3a	0.383995	0.00190476	8.14907e-11
chr12	CGI5070	109153337	109155895	Bcl11b	0.0362496	0.0036499	4.37765e-10
chr10	CGI1939	80542674	80543483	Thop1	0.227332	0	7.49189e-10
chr4	CGI15440	153812404	153813142	Prdm16	0.450701	0.00479403	1.03397e-09
chr5	CGI16388	116357010	116357874	Cit	0.325063	0.0204204	2.59118e-09
chr7	CGI19832	139950974	139951780	Fam53b	0.44307	0	5.91977e-09
chr15	CGI6987	27785786	27786556	Trio	0.449945	0.0015873	1.29747e-08
chr4	CGI15402	151653113	151653603	Gpr153	0.316226	0.00223214	1.71243e-08
chr5	CGI16623	125315565	125316263	Ccdc92	0.396039	0.0102217	1.78647e-08
chr5	CGI16627	125538155	125539122	Ncor2	0.187597	0.00813008	1.8326e-08
chr10	CGI2367	127003525	127004068	Lrp1	0.342131	0	2.35178e-08
chr10	CGI1916	80326836	80327533	3110056O03Rik	0.293101	0.00308642	3.51234e-08
chr8	CGI21231	125275588	125276636		0.189048	0.0113005	3.64267e-08
chr8	CGI20239	34943709	34944317	Rbpms	0.411393	0.0034965	4.91198e-08
chr5	CGI17038	147835778	147836315	Lnx2	0.408017	0.0034965	5.57667e-08
chr19	CGI10705	25484479	25484865	Kank1	0.237701	0.0109007	5.57667e-08
chr4	CGI15231	141033273	141033901	Spen	0.230015	0.00366541	5.57667e-08
chr9	CGI21452	21574103	21574683	Kank2	0.472157	0.00570583	5.57667e-08
chr5	CGI16629	125586275	125586926	Ncor2	0.588318	0	6.47586e-08
chr5	CGI17014	145606020	145606616	Trrap	0.457668	0.00702076	6.47586e-08
chr12	CGI5137	112562477	112563171	Cdc42bpb	0.560655	0.0106838	6.47586e-08
chr5	CGI16407	117690694	117691436	Taok3	0.14588	0	6.53428e-08
chr5	CGI16423	118511143	118511741	Tesc	0.278791	0.0049794	6.79845e-08
chr8	CGI21205	124276686	124277900	Jph3	0.0633462	0.0027417	9.59427e-08
chr2	CGI11464	30938133	30938730	Fnbp1	0.30857	0.00307692	1.26038e-07
chr8	CGI21129	122465355	122465930	Usp10	0.490325	0.00679739	1.26999e-07
chr5	CGI16904	140230789	140231395	Ints1	0.41196	0	1.3718e-07
chr15	CGI7730	99922325	99923078	Dip2b	0.327384	0	1.45492e-07
chr12	CGI5180	113974515	113974932	AW555464	0.477436	0	1.45832e-07
chr12	CGI5191	114151339	114151928	Jag2	0.339697	0.00733333	1.64246e-07
chr17	CGI8864	28179168	28179657	Anks1	0.469921	0	2.07988e-07
chr13	CGI5979	96731085	96731734	Sv2c	0.167984	0	2.46725e-07
chr1	CGI1200	191610449	191611007	Ptpn14	0.287728	0	3.09403e-07
chr4	CGI15461	154531974	154532510	Ski	0.3615	0.010582	3.15984e-07
chr17	CGI8961	32277971	32278584	Notch3	0.0871238	0.00333333	3.88165e-07
chr11	CGI2440	3041952	3046574	Sfi1	0.158251	0.0483515	3.88165e-07
chr9	CGI21834	57679071	57679776	Arid3b	0.269894	0.00310559	5.35761e-07
chr6	CGI17706	88786101	88786648	Abtb1	0.221295	0.00320513	6.31876e-07
chr17	CGI8861	28122961	28123498	Anks1	0.534049	0.0012987	6.85348e-07
chr19	CGI10963	45582031	45582555	Btrc	0.337883	0.00378788	6.85348e-07
chr2	CGI12458	152529439	152530034	H13	0.456584	0.00395257	8.49283e-07
chr8	CGI21228	125162479	125163053	Cbfa2t3	0.675953	0.00284091	8.49283e-07
chr12	CGI4513	29385367	29385946	Ttc15	0.336068	0.00568182	8.49283e-07
chr11	CGI2436	3031850	3038018	Pisd-ps1,Pisd-ps3,Sfi1	0.210725	0.086453	8.49283e-07
chr7	CGI19457	106036244	106036898	Uvrag	0.169919	0.00238095	9.48045e-07
chr12	CGI5166	113415984	113416367	Kif26a	0.228183	0.00378788	9.48716e-07
chr8	CGI21267	126908137	126908600	Pgbd5	0.326791	0.00947444	9.48716e-07
chr11	CGI4172	116083033	116084564	Evpl	0.0325067	0.00156986	9.48716e-07
chr4	CGI14867	128586235	128586933	Trim62	0.1036	0	9.94516e-07
chr7	CGI19234	75102827	75103406	Igf1r	0.341069	0.00908521	1.21745e-06
chr5	CGI16379	115970260	115970687	Pxn	0.347055	0	1.21745e-06
chr4	CGI14860	128425064	128425578	Phc2	0.528623	0	1.21745e-06
chr8	CGI21222	125011917	125012511	Fam38a	0.44493	0	1.21745e-06
chr2	CGI12715	165670989	165671500	Zmynd8	0.527227	0.00280112	1.25178e-06
chr10	CGI1841	79537730	79538313	Sbno2	0.218347	0.00617284	1.49979e-06
chr11	CGI3368	79466364	79467006	Rab11fip4	0.430326	0.0047619	1.53748e-06
chr17	CGI9237	46798624	46799262	Cul7	0.598758	0.00238095	1.53748e-06
chr1	CGI71	20924569	20925771	Paqr8	0.0288325	0	1.53748e-06
chr11	CGI4280	119871082	119871520	Aatk	0.377744	0.00396825	1.53748e-06
chr15	CGI7378	80706622	80707153	Tnrc6b	0.244236	0	1.6384e-06
chr10	CGI1802	79171416	79171878	Bsg	0.305174	0	1.6384e-06
chr7	CGI19995	151469966	151471099	Shank2	0.121661	0.00619435	1.70555e-06
chr1	CGI1213	192772842	192773315	Vash2	0.325086	0.0031746	1.70555e-06
chr6	CGI17707	88789157	88789729	Abtb1	0.273463	0.0135582	2.15443e-06
chr8	CGI21154	123096392	123096900	Gse1	0.379883	0.0186335	2.16185e-06
chr2	CGI12689	164932081	164932657		0.299287	0	2.2532e-06
chr11	CGI3070	67508471	67509447	Rcvrn	0.0502347	0.0026738	2.27988e-06
chr12	CGI5167	113433284	113433952		0.271971	0	2.31172e-06
chr1	CGI382	74441120	74441680	Ctdsp1	0.396937	0.00502646	2.43808e-06
chr8	CGI21046	113481386	113481943	St3gal2	0.190833	0.00869565	2.44429e-06
chr17	CGI9355	56433607	56434071	Arrdc5	0.350014	0.00714286	2.77528e-06
chr7	CGI19629	126127342	126128169	Gprc5b	0.0944331	0.00183824	2.77528e-06
chr3	CGI13857	135270934	135271552	Nfkb1	0.374181	0.00384615	2.89331e-06
chr13	CGI5992	98016224	98016727	Enc1	0.415422	0.00416667	2.89331e-06
chr15	CGI7333	79263427	79263921	Csnk1e	0.350436	0.00277778	2.89331e-06
chr8	CGI21155	123101686	123102085	Gse1	0.462214	0.0025	2.89331e-06
chr8	CGI21141	122833134	122833634		0.465684	0.00294118	2.89331e-06
chr8	CGI20978	109241777	109242386	Tmco7	0.380279	0.00294118	2.89331e-06
chr6	CGI17757	93665831	93666298	Magi1	0.372454	0.00703463	2.93676e-06
chr6	CGI17602	83320345	83320910	Tet3	0.428092	0	3.07937e-06
chr9	CGI22476	119426443	119426905	Scn5a	0.314678	0.015942	3.3179e-06
chr7	CGI19462	106497166	106497848	Serpinh1	0.0784272	0.00277778	3.33082e-06
chr4	CGI15317	148455526	148456019	Pex14	0.370441	0.0113095	3.56151e-06
chr19	CGI11009	46693351	46693853	D19Wsu162e	0.349548	0	3.59553e-06
chr4	CGI14204	43996454	43998053	Ccin	0.0415106	0.00557035	3.65256e-06
chr5	CGI16631	125620525	125621047	Ncor2	0.439878	0	4.14504e-06
chr7	CGI19951	148798485	148798954	Ap2a2,Gm16982	0.484859	0.00595238	4.14504e-06
chr9	CGI22375	110232038	110232575		0.205003	0	4.14504e-06
chr2	CGI11320	25296687	25297084	Abca2	0.483314	0	4.14504e-06
chr2	CGI12154	121125225	121125692	Mtap1a	0.268724	0.0117938	4.14504e-06
chr1	CGI165	37743860	37744483	2010300C02Rik	0.170886	0.00979455	4.14504e-06
chr15	CGI7426	82768549	82768948		0.371622	0	4.14504e-06
chr11	CGI3261	75255177	75255582	Wdr81	0.344693	0	4.14504e-06
chr5	CGI16351	115575103	115575610	Unc119b	0.256682	0	4.14504e-06
chr5	CGI16408	117700784	117701165	Taok3	0.316198	0.0154762	4.14504e-06
chr8	CGI21218	124963200	124963714	Mvd	0.488375	0.0171429	4.14504e-06
chr5	CGI15566	21181043	21182006	Napepld	0.0439242	0	4.75676e-06
chr14	CGI6212	21576658	21577180	Camk2g	0.426376	0.0037037	4.75676e-06
chr15	CGI7336	79323967	79324493	Kcnj4	0.263691	0.00592055	4.80817e-06
chr11	CGI2614	19897991	19898520	Spred2	0.45193	0.00454545	4.80817e-06
chr8	CGI20340	49313592	49314728	Tenm3	0.0457455	0.00202429	4.80817e-06
chr15	CGI7480	85389241	85389600	Wnt7b	0.283395	0.0137772	4.80817e-06
chr11	CGI4082	113689566	113689964	Sdk2	0.364304	0	5.0049e-06
chr6	CGI17733	91183035	91183632	Fbln2	0.522186	0.00164474	5.10725e-06
chr12	CGI5094	110197508	110198119	Wdr25	0.337408	0.015873	5.10725e-06
chr11	CGI4147	115653065	115653535	2310067B10Rik	0.500517	0.00438596	5.10725e-06
chr5	CGI16319	114878564	114879041		0.394596	0.00877193	5.10725e-06
chr11	CGI4137	115349937	115350382	Armc7	0.391303	0.00584795	5.10725e-06
chr8	CGI20817	94396502	94396896		0.256819	0.0119048	5.10725e-06
chr12	CGI5172	113903614	113904142	Akt1	0.487165	0.00657895	5.10725e-06
chr15	CGI7615	97075544	97076122	Amigo2	0.098373	0.0036151	5.3375e-06
chr7	CGI19238	75463398	75463900	Fam169b	0.233978	0.00964286	5.3375e-06
chr11	CGI3285	76076417	76076976	Nxn	0.253497	0	5.44065e-06
chr11	CGI4056	109316167	109316723	Slc16a6	0.112037	0.00164204	5.57849e-06
chr15	CGI7213	75939297	75939711	Eppk1	0.306718	0.0114583	5.60596e-06
chr4	CGI14830	126426966	126427974	Ncdn	0.116412	0.00644093	5.90124e-06
chr2	CGI11485	31678177	31678641	Fibcd1	0.164744	0.00516667	6.24509e-06
chr12	CGI4520	30687350	30687775	Pxdn	0.230997	0.005	7.00413e-06
chr11	CGI3776	98707125	98707694	Rapgefl1	0.187019	0	7.00413e-06
chr11	CGI3638	96150590	96151036	Hoxb7	0.154934	0	7.52222e-06
chr2	CGI12741	167308770	167309308	Spata2	0.286346	0.0148601	7.6712e-06
chr11	CGI2899	55075819	55076410	Fat2	0.314931	0	7.86116e-06
chr10	CGI1590	59773561	59773961	Cdh23	0.394968	0	7.86116e-06
chr2	CGI11319	25288476	25288991	Abca2	0.455024	0	7.86116e-06
chr4	CGI15322	148594564	148595014	Kif1b	0.435683	0	7.86116e-06
chr10	CGI1597	60270547	60271082	Unc5b	0.556522	0.00347222	8.26726e-06
chr12	CGI5165	113399668	113400143	Kif26a	0.209104	0.00974359	8.63453e-06
chr7	CGI18878	36621716	36622402	E130304I02Rik	0.105622	0.00571429	9.0128e-06
chr8	CGI21191	124004365	124004868		0.236827	0.00543478	9.27031e-06
chr2	CGI12833	172759496	172760025	Bmp7	0.26833	0	9.62731e-06
chr15	CGI7550	89289222	89289806	Mapk8ip2	0.164705	0	9.62731e-06
chr17	CGI9387	57161941	57162311	Khsrp	0.196227	0.00657895	9.62731e-06
chr8	CGI20334	48932604	48933039	Wwc2	0.395111	0.0042735	9.73441e-06
chr4	CGI14666	117317502	117317900	Eri3	0.328956	0.00625	9.73441e-06
chr15	CGI7700	99064228	99064626	Kcnh3	0.379479	0.0042735	9.73441e-06
chr12	CGI5034	105844195	105844680		0.336101	0.00326797	9.73441e-06
chr1	CGI322	64125225	64125736	Klf7	0.189171	0.00454545	9.73441e-06
chr6	CGI18045	127961795	127962286	Tspan9	0.422625	0.00555556	9.73441e-06
chr2	CGI11517	32452424	32452901	St6galnac4	0.364032	0.00396825	9.73441e-06
chr15	CGI7410	82001427	82001874	Srebf2	0.571482	0.00462963	9.73441e-06
chr4	CGI15169	138985824	138986303	Ubr4	0.534486	0.0182749	9.73441e-06
chr2	CGI11463	30916708	30917303	Fnbp1	0.341454	0.0042735	9.73441e-06
chr19	CGI11019	47207251	47207731	Calhm2	0.190347	0	1.04028e-05
chr18	CGI10240	75662352	75662893	Ctif	0.238523	0	1.10625e-05
chr11	CGI4261	119076518	119077093	Tbc1d16	0.259657	0.0042735	1.13671e-05
chr10	CGI1744	75817466	75817928	Pcnt	0.321783	0.00462963	1.13808e-05
chr15	CGI7372	80189189	80189608	Cacna1i	0.341694	0.0132216	1.16225e-05
chr5	CGI16246	111863099	111863564	Mn1	0.255	0	1.16628e-05
chr11	CGI4169	116010153	116010615	Fbf1	0.307336	0.00793651	1.22236e-05
chr17	CGI8600	9060356	9061024	Pde10a	0.173403	0.00434783	1.22952e-05
chr5	CGI16500	121017236	121017691	Tpcn1	0.458911	0.00952381	1.22952e-05
chr5	CGI16785	136616066	136616628	Alkbh4	0.320044	0.0117965	1.2932e-05
chr4	CGI15192	140137244	140137774	Arhgef10l	0.290581	0.0166463	1.2932e-05
chr1	CGI1183	189172192	189172639	Gpatch2	0.327127	0.0116883	1.2932e-05
chr4	CGI14861	128444091	128444973	A3galt2	0.0402177	0	1.3845e-05
chr4	CGI14010	8792807	8793779	Chd7	0.0606961	0.0010352	1.39168e-05
chr5	CGI16315	114759472	114759914		0.133889	0	1.39168e-05
chr4	CGI14664	117181293	117181747		0.117866	0	1.39168e-05
chr15	CGI7224	76122546	76123063	Spatc1	0.181086	0	1.39168e-05
chr7	CGI19854	144445024	144445447	Ebf3	0.461363	0.0147707	1.43954e-05
chr5	CGI16599	124529878	124530279	Abcb9	0.530681	0	1.43954e-05
chr4	CGI14542	107161951	107162428	Glis1	0.280461	0	1.43954e-05
chr4	CGI14307	53872770	53873131	Tmem38b	0.355888	0	1.43954e-05
chr2	CGI11177	6273762	6274206	Usp6nl	0.352118	0	1.43954e-05
chr5	CGI16628	125543418	125543802	Ncor2	0.298216	0	1.43954e-05
chr2	CGI12629	163114634	163114995	Tox2	0.201827	0	1.43954e-05
chr7	CGI18356	16725679	16726660	Slc8a2	0.038265	0.00111982	1.43954e-05
chr8	CGI20777	90265928	90266366	Zfp423	0.287882	0.0171485	1.43954e-05
chr1	CGI592	94968114	94968540	Kif1a	0.238888	0	1.43954e-05
chr4	CGI14678	117845502	117845900	Kdm4a	0.370677	0.0240829	1.46894e-05
chr10	CGI1624	61790329	61790800	Hk1	0.373973	0.00420168	1.49801e-05
chr15	CGI7216	76020446	76020913	Plec	0.56644	0	1.60769e-05
chr12	CGI5077	109479022	109479547	Ccdc85c	0.440432	0.00956938	1.60769e-05
chr15	CGI7027	36143962	36144731	Spag1	0.266604	0	1.6475e-05
chr12	CGI5106	110766361	110766887		0.086272	0	1.71099e-05
chr8	CGI21198	124172238	124172706	Zcchc14	0.435943	0.00840336	1.74983e-05
chr14	CGI6641	66767608	66768332	Chrna2	0.0507047	0	1.77633e-05
chr1	CGI342	69423409	69425027		0.0372229	0.003881	1.77884e-05
chr18	CGI10109	61664974	61665479	Arhgef37	0.354713	0.00309598	1.8757e-05
chr8	CGI20293	46107195	46107660	Fat1	0.25713	0	2.04306e-05
chr11	CGI3857	101047740	101048139	Cntnap1	0.274053	0	2.04306e-05
chr2	CGI12740	167296765	167297215	Slc9a8	0.356593	0.0254614	2.06737e-05
chr2	CGI11937	92793538	92793966	Syt13	0.26915	0.0117284	2.08076e-05
chr2	CGI11897	90959133	90959778	Mybpc3	0.257805	0.016047	2.08076e-05
chr17	CGI8673	23712843	23713978	Zfp13	0.0422848	0.0016129	2.27608e-05
chr4	CGI15416	151932376	151932760	Nphp4	0.503801	0.00766189	2.41014e-05
chr5	CGI16279	113566573	113568173	2900026A02Rik	0.0519463	0.00171233	2.41014e-05
chr17	CGI8967	32334283	32334673	Brd4	0.36383	0.00653595	2.41014e-05
chr1	CGI145	36598543	36599077	Ankrd39	0.324344	0.00882353	2.41014e-05
chr2	CGI12705	165221016	165221924	Ocstamp	0.0383482	0	2.43167e-05
chr11	CGI2979	60013225	60013777	Srebf1	0.176519	0.00694444	2.44189e-05
chr3	CGI13700	108209646	108210384	Celsr2	0.0465681	0	2.60664e-05
chr12	CGI5096	110271073	110273113	Begain	0.0281844	0.00668624	2.63789e-05
chr15	CGI7299	78629434	78629907	Card10	0.18785	0	2.71259e-05
chr17	CGI8955	31946808	31947329		0.166989	0	2.71457e-05
chr11	CGI3089	68801679	68802249	Pfas	0.155696	0	2.71457e-05
chr11	CGI3703	97313016	97313461	Arhgap23	0.286274	0	2.71457e-05
chr15	CGI7433	82864982	82865537		0.240838	0.00931174	2.71457e-05
chr16	CGI8418	90044129	90044656		0.390725	0.00263158	2.73374e-05
chr14	CGI6334	35378864	35379220	Ldb3	0.153207	0	2.86104e-05
chr12	CGI5138	112598972	112599495	Cdc42bpb	0.381451	0.0147059	2.86104e-05
chr2	CGI12699	165136922	165137384	Elmo2	0.512744	0.0140484	2.86104e-05
chr5	CGI16245	111861000	111861525	Mn1	0.353329	0.00555556	2.86104e-05
chr8	CGI21151	123072239	123072686	Gse1	0.35134	0	2.8762e-05
chr4	CGI15442	153880895	153881294	Prdm16	0.39351	0	2.8762e-05
chr5	CGI16630	125609269	125609726	Ncor2	0.52312	0	2.88368e-05
chr6	CGI17931	121037657	121038227	Mical3	0.193608	0.00721925	2.90868e-05
chr17	CGI9342	56267599	56268022	Sema6b	0.345949	0.00904977	2.90868e-05
chr1	CGI980	169562239	169562949	Rxrg	0.0789149	0.00952381	2.97708e-05
chr11	CGI4318	120490611	120491189	Mafg	0.0607602	0	2.98397e-05
chr15	CGI7215	76016302	76016679	Plec	0.43694	0	3.16856e-05
chr8	CGI21311	129819832	129820291	Pard3	0.444941	0.0102496	3.16856e-05
chr2	CGI12879	179300416	179300896	Cdh4	0.279194	0.00653595	3.17451e-05
chr4	CGI14206	44042542	44042979	Clta	0.36862	0.0137402	3.2458e-05
chr1	CGI732	134415196	134415579	Cntn2	0.278478	0.00505051	3.2458e-05
chr9	CGI22436	114813797	114814249	Gpd1l	0.378147	0.0169777	3.29086e-05
chr19	CGI10824	41162902	41163365	Tll2	0.118842	0.00723623	3.60118e-05
chr12	CGI5078	109503937	109504331	Ccdc85c	0.450397	0.00215517	3.77166e-05
chr8	CGI21200	124184599	124184995		0.346084	0.00390625	3.79742e-05
chr5	CGI16317	114824759	114825325	Kctd10	0.533213	0.00297619	3.79742e-05
chr15	CGI6967	25293805	25294929	Basp1	0.0264558	0.00483631	3.81013e-05
chr11	CGI3802	99846390	99846945	Gm11570	0.150515	0.00340136	3.96717e-05
chr9	CGI21724	50306903	50307349	1600029D21Rik,2310014F07Rik	0.346204	0	4.03658e-05
chr15	CGI7791	101813409	101813999		0.110654	0	4.20088e-05
chr5	CGI17011	145316941	145317416	Nptx2	0.182756	0.0174866	4.39231e-05
chr5	CGI16882	139899022	139899503	3110082I17Rik,Gpr30	0.652316	0.015625	4.478e-05
chr9	CGI21827	57488207	57488628	Csk	0.322949	0.00892857	4.52518e-05
chr11	CGI3935	102600516	102601109		0.150528	0.0075	4.52518e-05
chr12	CGI4930	88301171	88301615	2310044G17Rik	0.547307	0.00927198	4.80434e-05
chr7	CGI19688	133392114	133392487		0.298456	0.00737847	4.80434e-05
chr4	CGI14009	8678777	8679535	Chd7	0.0965299	0.00333333	4.84948e-05
chr7	CGI18760	30181985	30182402	Sipa1l3	0.603924	0	4.87578e-05
chr7	CGI20008	152118414	152118792	Ccnd1	0.290995	0.00854701	5.12258e-05
chr8	CGI21043	113407581	113408091	Fuk	0.179218	0.00876467	5.19335e-05
chr15	CGI7295	78502483	78503254	Elfn2	0.0576631	0	5.27267e-05
chr7	CGI18403	17492133	17493059	Ptgir	0.056385	0.00163666	5.69182e-05
chr2	CGI12737	167124751	167125222	B4galt5	0.449776	0	5.90494e-05
chr4	CGI14302	53488083	53488470	Slc44a1	0.391509	0	5.90494e-05
chr17	CGI9608	86817769	86818198	Prkce	0.313336	0	5.90494e-05
chr8	CGI21140	122830956	122831382		0.503602	0	5.90494e-05
chr12	CGI5085	109610387	109610800		0.359667	0	5.90494e-05
chr13	CGI5693	56205685	56206049	H2afy	0.576956	0	5.90494e-05
chr7	CGI19695	133616140	133616500	Sh2b1	0.342607	0	5.90494e-05
chr7	CGI19690	133435089	133436347	Sbk1	0.0427746	0.00898438	5.90494e-05
chr7	CGI19802	137404342	137404717	Fgfr2	0.406797	0	5.90494e-05
chr12	CGI5047	107004729	107005249	Ak7	0.0890677	0.00181159	5.90494e-05
chr10	CGI1284	7933726	7934176	Ust	0.219327	0	5.90494e-05
chr13	CGI5789	65359279	65361559		0.0298467	0.00194496	5.90494e-05
chr2	CGI11671	59637576	59638025	Tanc1	0.452307	0.00920635	5.9168e-05
chr2	CGI11486	31681007	31681420	Fibcd1	0.349146	0.00793269	5.96586e-05
chr7	CGI19981	150644654	150647677	Cdkn1c	0.0156239	0.00249756	5.96586e-05
chr5	CGI15519	5508038	5508477	Cldn12	0.131069	0.00438596	5.98586e-05
chr11	CGI4229	118063540	118064272	Cyth1	0.315022	0.0220779	6.05073e-05
chr8	CGI20178	26178534	26178992	Plekha2	0.256679	0.0123249	6.14586e-05
chr9	CGI22477	119428216	119428654	Scn5a	0.113666	0	6.24028e-05
chr8	CGI21312	130126730	130127295	Pard3	0.370137	0.0115196	6.45917e-05
chr14	CGI6648	67442893	67443324	Dpysl2	0.431019	0.0190476	6.55174e-05
chr2	CGI12742	167309557	167309998	Spata2	0.166075	0.00392157	6.66848e-05
chr13	CGI5643	54700062	54700755	Cltb	0.301119	0.0234289	6.87515e-05
chr8	CGI20607	79709649	79710235	Nr3c2	0.0452412	0	7.20366e-05
chr5	CGI16706	131915229	131916600	Auts2	0.0483761	0.00448802	7.24301e-05
chr15	CGI6988	27853315	27853777	Trio	0.381209	0.00740741	7.57391e-05
chr11	CGI4259	119070040	119070697	Tbc1d16	0.203857	0.0180769	7.57391e-05
chr12	CGI5199	114285039	114285420	Pacs2	0.513321	0.0121212	7.57391e-05
chr11	CGI3961	103125663	103126174	Map3k14	0.4215	0.00606061	7.57391e-05
chr15	CGI7273	77594659	77595168	Myh9	0.563406	0.00392157	7.57391e-05
chr17	CGI8951	31842226	31842705		0.349402	0.014881	7.57391e-05
chr5	CGI16389	116444134	116444550	Cit	0.432776	0.00444444	7.57391e-05
chr11	CGI2448	3056324	3059083	Sfi1	0.172581	0.0510595	7.57391e-05
chr5	CGI17003	144945608	144945983	Lmtk2	0.362462	0.00740741	7.57391e-05
chr5	CGI16548	122774996	122775386		0.463748	0.00740741	7.57391e-05
chr18	CGI10237	75584115	75584552		0.383929	0.0200014	7.85469e-05
chr11	CGI3388	80416563	80416971	Myo1d	0.30604	0	7.98008e-05
chr8	CGI20863	97600011	97600421	Ccdc135	0.270001	0	7.98008e-05
chr2	CGI11577	35575722	35576149	Dab2ip	0.373595	0	8.05267e-05
chr1	CGI563	92118714	92119066		0.436267	0	8.05267e-05
chr4	CGI15226	140975293	140975693		0.231581	0	8.05267e-05
chr7	CGI19965	149766117	149766601		0.228185	0.00347222	8.10226e-05
chr14	CGI6855	119057166	119057617	Abcc4	0.383482	0.018779	8.12378e-05
chr2	CGI11377	27356581	27357694		0.210093	0.0309905	8.12378e-05
chr4	CGI15387	151470699	151471159	Plekhg5	0.224438	0.00549451	8.4495e-05
chr4	CGI14673	117584534	117585037	Ipo13	0.227384	0.013917	8.4495e-05
chr1	CGI147	36609432	36609993	Sema4c	0.258025	0.00976377	8.57278e-05
chr7	CGI18889	38163099	38163486		0.301154	0.00555556	8.83314e-05
chr19	CGI10415	4867682	4868129	Actn3	0.131071	0.003125	8.83314e-05
chr11	CGI4044	107884338	107884876	Prkca	0.129868	0.00490196	8.83314e-05
chr7	CGI18711	29347430	29347846	Pak4	0.277526	0.00740741	8.83314e-05
chr18	CGI10217	74435451	74435829	Mbd1	0.261761	0.00740741	8.8492e-05
chr8	CGI20107	12947728	12948205	Mcf2l	0.428771	0.00606061	8.8492e-05
chr9	CGI22287	107386672	107387109	Cacna2d2	0.313174	0.0121185	9.16055e-05
chr13	CGI6093	112767928	112768419		0.0701681	0.00181818	9.16055e-05
chr9	CGI22516	121355621	121356044	Trak1	0.396961	0.00808824	9.17427e-05
chr8	CGI20792	91188821	91189385	Nod2	0.148476	0.00227273	9.17427e-05
chr16	CGI8462	91869736	91870189	Itsn1	0.581274	0	9.40656e-05
chr11	CGI3931	102486417	102486932		0.302086	0.00333333	9.40656e-05
chr4	CGI15336	149189285	149189929		0.117869	0.00357143	9.49097e-05
chr2	CGI12539	155817387	155817924	Cep250	0.423198	0.00510204	9.53277e-05
chr8	CGI20499	73298438	73298807	Pik3r2	0.133197	0	0.000104049
chr9	CGI22327	108039858	108040278	Bsn	0.250051	0	0.000104817
chr10	CGI1725	75052301	75052887	Ggt5	0.231145	0.020643	0.000104817
chr11	CGI3819	100432448	100432826	Ttc25	0.123789	0	0.000105197
chr16	CGI8102	21976073	21976609	Liph	0.13794	0.00845865	0.000105574
chr4	CGI14991	132766333	132766935	Gpr3	0.0998611	0.00670078	0.000112307
chr10	CGI2285	120898451	120898923	Rassf3	0.312095	0	0.000114362
chr12	CGI5051	107113404	107113792		0.261914	0.00347222	0.000114362
chr11	CGI2949	58858220	58858694	Obscn	0.540416	0	0.000114362
chr13	CGI6117	115198923	115199449		0.0984186	0	0.000114362
chr15	CGI7154	72498823	72499288	Trappc9	0.392449	0	0.000114362
chr15	CGI7346	79537318	79537676	Gtpbp1	0.587746	0	0.000114362
chr12	CGI4835	83072268	83072670	Pcnx	0.474575	0	0.000114362
chr11	CGI4239	118554242	118554755	Rbfox3	0.294387	0.00446429	0.000114362
chr11	CGI2870	53352560	53353021	Sept8	0.360658	0	0.000114362
chr9	CGI21849	58384908	58385335	Cd276	0.245568	0.00568182	0.000114362
chr1	CGI383	74441931	74442344	Ctdsp1	0.197055	0	0.000114362
chr18	CGI10306	80886665	80887100	Nfatc1	0.60966	0	0.000114362
chr12	CGI5181	113975951	113976432	AW555464	0.425655	0	0.000114696
chr16	CGI8402	87726043	87726551	Bach1	0.14503	0.0030303	0.000125854
chr5	CGI16626	125508782	125509169	Ncor2	0.510518	0.0462963	0.000127501
chr15	CGI7570	92101512	92101963	Cntn1	0.0823137	0	0.000128466
chr2	CGI12113	119119167	119120480	Vps18	0.0614734	0.00750256	0.000129425
chr8	CGI21153	123078539	123078932	Gse1	0.468486	0.0177778	0.000129709
chr15	CGI7578	93096703	93097156	Gxylt1	0.361471	0.0151058	0.000129992
chr12	CGI4836	83173633	83174124		0.155716	0.00328947	0.000131603
chr17	CGI8831	27165226	27165703	Bak1,Ggnbp1	0.128163	0	0.000131878
chr12	CGI4968	99915594	99915970	Ptpn21	0.297475	0.00480769	0.000132152
chr4	CGI15058	134581542	134582057		0.208171	0.0131868	0.000139265
chr11	CGI3517	88162214	88162577	Msi2	0.155341	0	0.000139265
chr17	CGI9624	87750899	87751327	Ttc7	0.340002	0.0278075	0.00014541
chr12	CGI4909	87499647	87500117	Ift43	0.415622	0.00396825	0.000146866
chr4	CGI15130	137109436	137109841	Hspg2	0.268209	0.0215686	0.000146866
chr7	CGI18608	26418082	26418503	Bckdha	0.62626	0.00446429	0.000146866
chr16	CGI8414	89925130	89925531	Tiam1	0.310256	0.00892857	0.000146866
chr7	CGI18563	25697549	25697908	Arhgef1	0.245232	0.0047619	0.000146866
chr8	CGI21226	125117912	125118408	Galns	0.611799	0.0047619	0.000146866
chr11	CGI3729	97828082	97828500	Plxdc1	0.389049	0.00549451	0.000146866
chr4	CGI15441	153838535	153838918	Prdm16	0.41768	0.00357143	0.000146866
chr7	CGI19118	53517994	53518351	Otog	0.403162	0.00549451	0.000146866
chr7	CGI18960	51648658	51649021	Syt3	0.321413	0.0166993	0.000146866
chr11	CGI3387	80297531	80297967	Myo1d	0.446206	0.00549451	0.000146866
chr4	CGI15333	149101164	149101516	Tmem201	0.500001	0.00714286	0.000146866
chr19	CGI11032	47601064	47601436	Obfc1	0.460204	0.0102041	0.000146866
chr8	CGI21134	122684611	122685064	6430548M08Rik	0.648612	0.00549451	0.000146866
chr11	CGI4168	116007690	116008084	Fbf1	0.391677	0.00892857	0.000146866
chr8	CGI20114	13670074	13670514	Rasa3	0.249837	0	0.000152717
chr14	CGI6571	61375122	61375500	Spata13	0.461403	0.0247296	0.000155415
chr6	CGI18090	135187407	135187844	Gsg1	0.232706	0	0.000155608
chr10	CGI1626	61864294	61864779	Hkdc1	0.0912687	0.00292398	0.00015642
chr7	CGI19018	52343660	52344266	Rcn3	0.0611095	0.00222222	0.000157229
chr11	CGI3999	105025853	105028106		0.0202983	0.00272367	0.000158033
chr4	CGI15443	153978105	153978543	Prdm16	0.136949	0	0.000160063
chr6	CGI17740	91526911	91527300		0.325447	0.00714286	0.000168223
chr5	CGI16597	124447606	124448251	Hip1r	0.145647	0.0103122	0.000168378
chr18	CGI10149	65243077	65244038	Nedd4l	0.0658592	0.00904393	0.000171585
chr4	CGI14689	118244070	118244447	Wdr65	0.284143	0.00595238	0.000178429
chr17	CGI9449	69526004	69526634	Epb4.1l3	0.0746305	0	0.000178555
chr1	CGI664	121918596	121918951	Sctr	0.185282	0.00520833	0.000178931
chr5	CGI16955	143523178	143523560	Tnrc18	0.436044	0.00510204	0.000178931
chr4	CGI14105	32951009	32951658	Ankrd6	0.0750251	0.00146628	0.000178931
chr15	CGI7532	88990527	88991625	Plxnb2	0.0480603	0.00138889	0.00018326
chr5	CGI16709	132295168	132295603	Auts2	0.498157	0.00570981	0.000183971
chr19	CGI10915	44835972	44836462	Pax2	0.169907	0.00309598	0.000184679
chr18	CGI9982	39550704	39551261		0.103781	0.00436863	0.000184786
chr5	CGI16870	139370328	139370840		0.262181	0	0.000185593
chr2	CGI12876	178240804	178241235		0.220493	0	0.000185593
chr1	CGI1201	191622836	191623219	Ptpn14	0.453647	0.00549451	0.000191019
chr5	CGI16657	128748939	128749754	Tmem132d	0.0617092	0.00245098	0.000191699
chr4	CGI15111	135998620	135999172	Htr1d	0.0637164	0.00565115	0.000195905
chr11	CGI3307	77282560	77283195	Coro6	0.0539669	0	0.000197742
chr18	CGI10248	76305160	76306323	Zbtb7c	0.0601208	0.00726311	0.000197813
chr5	CGI16269	112956042	112956412	Sez6l	0.242789	0.00803571	0.000201971
chr7	CGI19768	134942464	134942895	Setd1a	0.129528	0	0.000205575
chr14	CGI6474	55432748	55433289		0.0501987	0.00252525	0.000205575
chr7	CGI19855	144458251	144458651	Ebf3	0.179388	0	0.000207364
chr11	CGI3712	97425073	97425480	Srcin1	0.423041	0.0194444	0.000211454
chr2	CGI12843	173239336	173239706		0.428998	0.0183983	0.0002161
chr12	CGI4905	87304800	87305250	Ttll5	0.585545	0.0236678	0.000217848
chr9	CGI21777	54863241	54863884	Chrna3	0.0593603	0	0.000221307
chr19	CGI10511	6388013	6388443	Pygm	0.354833	0	0.000221582
chr7	CGI19516	109149505	109149908	Numa1	0.235523	0	0.000221582
chr11	CGI3078	68344823	68345183	Pik3r6	0.312334	0	0.000221582
chr2	CGI12455	152459984	152460669	Rem1	0.0467806	0	0.000221582
chr4	CGI15179	139385980	139386343	Pax7	0.348809	0	0.000221582
chr4	CGI15137	137282618	137283141	Rap1gap	0.129048	0.00280112	0.000221582
chr5	CGI16945	142917722	142918222	Foxk1	0.320159	0	0.000221582
chr11	CGI3909	102085947	102086512	Hdac5	0.142927	0.009375	0.000221582
chr2	CGI11178	6399328	6399680		0.233969	0	0.000221582
chr5	CGI15806	38266509	38266931		0.327098	0	0.000221582
chr15	CGI7107	57754462	57754825	Wdr67	0.433004	0	0.000221582
chr17	CGI9194	45697171	45697581	Nfkbie	0.217004	0	0.000221582
chr10	CGI1880	79875227	79876183	Tcf3	0.067473	0.00116144	0.000221582
chr4	CGI14185	43419193	43419680	Rusc2	0.0758863	0	0.000221582
chr19	CGI10815	40469791	40470154	Sorbs1	0.303356	0	0.000221582
chr13	CGI6088	111189100	111189627	Plk2	0.0590697	0	0.000221582
chr17	CGI8834	27256067	27256459	Itpr3	0.519719	0	0.000221582
chr5	CGI16942	142648322	142648695	Sdk1	0.421206	0.0102564	0.000221582
chr5	CGI16562	123338432	123338865	Kdm2b	0.172761	0.0157496	0.000221582
chr11	CGI4086	114029536	114029888		0.37907	0	0.000221582
chr1	CGI549	91540603	91540976	Agap1	0.560731	0	0.000221582
chr15	CGI7731	99938839	99939221	Dip2b	0.36342	0	0.000221582
chr6	CGI17550	72690605	72690960	Tcf7l1	0.28444	0	0.000221582
chr18	CGI10039	50190742	50191175	Tnfaip8	0.433915	0	0.000221582
chr8	CGI20090	11912856	11913259		0.34089	0	0.000221582
chr8	CGI20848	97098052	97098454		0.45844	0	0.000221582
chr7	CGI19123	53765165	53765547	Sergef	0.407666	0	0.000221582
chr2	CGI11382	27989154	27989624		0.521506	0	0.000221582
chr8	CGI20833	96474022	96474455	Gnao1	0.481297	0.00555556	0.000221582
chr1	CGI427	75381148	75382077	Speg	0.0545735	0.00328947	0.000226385
chr15	CGI7294	78402053	78402563	Rac2	0.369351	0.00549451	0.000227977
chr11	CGI3981	103934029	103934721		0.0520452	0	0.000246527
chr1	CGI747	135284536	135284979	Sox13	0.375943	0.015873	0.000249066
chr7	CGI19978	150614307	150614745		0.168184	0	0.000249066
chr2	CGI12756	167656595	167657066		0.35309	0	0.000253222
chr15	CGI7350	79633816	79635980	Npcd,Nptxr	0.0229677	0.00482253	0.000256833
chr16	CGI7952	10511044	10511487	Ciita	0.235199	0.0047619	0.00025938
chr2	CGI12721	166400941	166401343	Prex1	0.274078	0.00510204	0.000263483
chr16	CGI8448	91329168	91329650		0.129929	0.0131579	0.000279042
chr10	CGI1979	80870029	80870661	Nfic	0.0613784	0.00418301	0.000287244
chr8	CGI21131	122586701	122587136		0.393158	0.00769231	0.000290345
chr6	CGI18127	140439513	140439870	Plekha5	0.498996	0.00591716	0.000290345
chr7	CGI19811	138047009	138047439	Plekha1	0.495593	0.0042735	0.000290345
chr11	CGI3817	100417008	100417529	Ttc25	0.524182	0.00854701	0.000290345
chr5	CGI16962	143640286	143640705	Fbxl18	0.511006	0.00769231	0.000290345
chr5	CGI16333	115168496	115168855	Tchp	0.486812	0.00591716	0.000290345
chr5	CGI15789	37300812	37301279	Ppp2r2c	0.18764	0.00347222	0.000290345
chr12	CGI5175	113926619	113927006		0.270603	0.00854701	0.000290345
chr2	CGI11473	31344617	31345018	Ass1	0.409471	0.00854701	0.000290345
chr10	CGI1665	66667919	66668290	Jmjd1c	0.380631	0.00187617	0.000290345
chr9	CGI21878	61163423	61163875		0.565297	0.00452489	0.000290345
chr12	CGI5010	103808325	103808705	Itpk1	0.420511	0.00961538	0.000290345
chr12	CGI5195	114203945	114204302	Brf1	0.645434	0.00769231	0.000290345
chr7	CGI19842	140957416	140957783	Dhx32	0.469403	0.00404858	0.000290345
chr5	CGI16380	116003836	116004208	Pxn	0.16125	0.0247253	0.000294224
chr17	CGI9263	47660129	47660523	Ccnd3	0.238979	0.0142857	0.000295074
chr11	CGI3995	104498289	104498753	Itgb3	0.337379	0.0089717	0.000296922
chr14	CGI6435	52628231	52629437	Zfp219	0.0329277	0	0.000297263
chr17	CGI9560	84245856	84246256	Haao	0.095899	0	0.000300105
chr6	CGI17856	113806889	113807252	Atp2b2	0.26446	0.00952381	0.000300105
chr19	CGI10480	5800881	5801315	Malat1	0.0876502	0	0.000300105
chr8	CGI21259	126330830	126331323	Rab4a	0.109917	0	0.000300105
chr14	CGI6284	31989775	31990424	Nisch	0.057495	0.00490196	0.000300105
chr10	CGI1778	77835739	77836149		0.171502	0	0.000300105
chr14	CGI6390	48854745	48855130	Peli2	0.504597	0	0.000300105
chr16	CGI8497	94407011	94407373	Hlcs	0.365131	0	0.000300105
chr14	CGI6772	79667547	79667902		0.20333	0	0.000300105
chr9	CGI22407	111452988	111453481		0.0740682	0	0.000300105
chr8	CGI21186	123814501	123814859		0.274092	0	0.000300105
chr2	CGI11336	25895458	25895921		0.228851	0	0.000300105
chr5	CGI16931	141199892	141200299	Amz1	0.43174	0	0.000300105
chr19	CGI10410	4802468	4802947	Rbm14	0.189859	0	0.000300105
chr16	CGI8386	84875292	84875671		0.0904628	0.0042735	0.000300105
chr10	CGI1573	59052627	59053040	Ccdc109a	0.384352	0	0.000300105
chr13	CGI5995	98700682	98701212	Rgnef	0.0766543	0.008	0.000303315
chr10	CGI1945	80615993	80617470	Pias4	0.0267881	0.000988142	0.000305551
chr4	CGI15418	152041141	152041525		0.489026	0.0271609	0.000309516
chr11	CGI2445	3052005	3053973	Sfi1	0.283491	0.0744584	0.000309516
chr17	CGI9393	57220412	57221363	Tubb4a	0.0510352	0.00458916	0.000310113
chr17	CGI8863	28152161	28152625	Anks1	0.580053	0.00512821	0.000310113
chr11	CGI4282	119874492	119875149	Aatk	0.063005	0	0.000316114
chr11	CGI3029	62478116	62478726	Mmgt2	0.0437237	0	0.000330153
chr15	CGI7510	88430917	88431271	Zdhhc25	0.0979645	0.00454545	0.0003323
chr14	CGI6297	32842463	32842861	Galntl2	0.376979	0	0.000339161
chr11	CGI3052	64815191	64815615	Arhgap44,Elac2	0.474304	0.00961538	0.000343165
chr17	CGI8929	29978672	29980134	Mdga1	0.0237831	0.00173611	0.000343836
chr5	CGI15608	24043372	24043845	Asb10	0.178469	0.00555556	0.000343836
chr1	CGI538	90149369	90150276	Heatr7b1	0.262035	0.0346214	0.000343836
chr4	CGI14238	45768698	45769068		0.27107	0.00591716	0.000345211
chr16	CGI8454	91523143	91523507		0.373907	0.00549451	0.000345211
chr9	CGI22236	103610989	103611370	Tmem108	0.593386	0.0155325	0.000345368
chr4	CGI14769	124189007	124189484		0.133792	0.00653595	0.000345368
chr4	CGI14237	45753875	45754256		0.389424	0.0100733	0.000345368
chr5	CGI16242	111630444	111630884	Ttc28	0.525367	0.0140415	0.000345368
chr16	CGI8208	33576515	33577278	Slc12a8	0.0408333	0	0.000345368
chr9	CGI22306	107587566	107588027	Sema3f	0.240702	0.00694444	0.00034973
chr17	CGI8862	28145039	28145424	Anks1	0.470759	0	0.000351315
chr2	CGI11398	28799405	28799891		0.142942	0.0240209	0.000351976
chr19	CGI10646	15032169	15032601		0.0670577	0	0.000352377
chr2	CGI12444	152165366	152165739	Trib3	0.0906222	0	0.000352377
chr15	CGI7355	79748504	79749594	Cbx7	0.0538449	0	0.000353032
chr9	CGI22369	109954396	109954859	Mtap4	0.216914	0.00740741	0.000379773
chr17	CGI8799	26256912	26257573	Tmem8	0.0977764	0.00416667	0.000379916
chr14	CGI6468	55250806	55251549	Cdh24	0.0247937	0.0037062	0.000381868
chr6	CGI17915	119868881	119869252	Rad52	0.27167	0.0191327	0.000383812
chr11	CGI4297	120122699	120123063	Bahcc1	0.491033	0	0.000390705
chr4	CGI15183	139521310	139521863	Klhdc7a	0.0693402	0.00666667	0.00039633
chr5	CGI16294	114003916	114004314	Wscd2	0.180034	0.0104377	0.00039633
chr11	CGI2615	19920565	19921702	Spred2	0.0339578	0.00453068	0.000406293
chr5	CGI16403	117553577	117553950	Suds3	0.595841	0.0283883	0.00040951
chr8	CGI20457	72975325	72977076	Klhl26	0.0263986	0.00343284	0.000409592
chr5	CGI16241	111487365	111487767	Ttc28	0.208361	0.00490196	0.000409754
chr6	CGI17698	88192591	88193010		0.172004	0.00625	0.000409754
chr8	CGI20901	106959814	106960244	Dync1li2	0.256716	0.0111111	0.000410721
chr13	CGI5954	95371406	95371868		0.0554248	0	0.000414483
chr5	CGI15886	64564600	64565050	Tbc1d1	0.0540105	0	0.000414483
chr15	CGI7427	82782680	82783161		0.100551	0	0.000414483
chr8	CGI20018	3451650	3452298	Arhgef18	0.0504794	0.00227273	0.000421155
chr19	CGI10851	42483638	42484049	Crtac1	0.156653	0	0.000425165
chr8	CGI21152	123073267	123073790	Gse1	0.174789	0	0.000425264
chr15	CGI7454	83828443	83829025	Efcab6	0.230054	0	0.000425264
chr10	CGI1773	77627468	77627880	D10Jhu81e	0.452218	0	0.00044028
chr11	CGI4112	115084712	115085083	Tmem104	0.566904	0	0.00044028
chr8	CGI21260	126340635	126341016	Rab4a	0.329328	0	0.00044028
chr2	CGI11836	77427631	77428035	Zfp385b	0.304338	0	0.00044028
chr6	CGI17321	39294089	39294474	Slc37a3	0.319831	0	0.00044028
chr6	CGI17996	125098712	125099094	Iffo1	0.200811	0	0.00044028
chr5	CGI16918	140684588	140685108	Mad1l1	0.492653	0	0.00044028
chr4	CGI14803	125491563	125491970		0.429489	0	0.000442056
chr16	CGI8411	89897893	89898779	Tiam1	0.0508019	0.0055158	0.000442056
chr1	CGI1076	178923783	178924191	Sdccag8	0.465688	0	0.000442056
chr5	CGI15951	73323994	73324558	Slain2	0.0736845	0.00444444	0.000449783
chr7	CGI18705	29243584	29245116	Lrfn1	0.0322053	0.00738397	0.000461756
chr16	CGI8464	91984716	91985213		0.0440188	0	0.000472789
chr9	CGI22270	106383417	106383829	Rrp9	0.425988	0	0.000472789
chr7	CGI18520	20438907	20439328	Ceacam16,Gm19345	0.0598923	0	0.000476148
chr19	CGI10962	45550399	45550858	Btrc	0.123256	0	0.000479495
chr5	CGI15624	24587367	24587796	Prkag2	0.212735	0	0.00048524
chr7	CGI19210	72538618	72539191		0.28033	0	0.00048524
chr1	CGI727	134256973	134257722	Tmcc2	0.0540076	0.0119763	0.00048524
chr2	CGI12567	156885794	156886217	9830001H06Rik	0.327065	0.0276033	0.000488544
chr2	CGI12334	138105947	138106321	Btbd3	0.272943	0.0178571	0.000491837
chr13	CGI5277	12545396	12545889	Lgals8	0.2844	0.0308079	0.00053288
chr13	CGI5985	97518113	97518814		0.052435	0.00348432	0.000535083
chr19	CGI11079	55667975	55668340	Vti1a	0.257402	0.00277778	0.000535083
chr5	CGI16612	124903165	124903671	Setd8	0.491033	0.00641026	0.0005633
chr9	CGI22515	121352719	121353364	Trak1	0.0325015	0	0.000574753
chr11	CGI3552	94344666	94345081	Spata20	0.315818	0.00555556	0.000576786
chr5	CGI16312	114718251	114718614	Foxn4	0.597471	0.00555556	0.000576786
chr15	CGI7160	72970624	72971094	Eif2c2	0.513928	0.00520833	0.000579747
chr1	CGI807	138112243	138113087	5730559C18Rik	0.061255	0.00599013	0.000579747
chr5	CGI15916	67193359	67193746	Limch1	0.302578	0.00641026	0.000579747
chr13	CGI5583	49404367	49404862	Fgd3	0.425853	0.00347222	0.000579747
chr10	CGI1967	80765571	80766016	Pip5k1c	0.415118	0.00520833	0.000579747
chr7	CGI19113	53313660	53314015	Nomo1	0.494173	0.0104167	0.000580679
chr13	CGI5694	56214413	56214796	H2afy	0.280327	0.00416667	0.000580679
chr4	CGI15421	152813174	152813539	Ajap1	0.475982	0.00490196	0.000580679
chr17	CGI9622	87724916	87725344	Ttc7	0.353943	0	0.000583709
chr8	CGI20455	72942821	72943193	Crtc1	0.319863	0.0115955	0.000594877
chr14	CGI6177	15177756	15179678	Il3ra	0.0301979	0.00246305	0.000597871
chr13	CGI5515	43594145	43594588		0.182366	0	0.000600853
chr12	CGI4516	29964620	29965009		0.121616	0	0.000607559
chr11	CGI4041	107564960	107565316	Cacng1	0.186564	0	0.000607559
chr2	CGI12589	158000544	158001059		0.487833	0.0277778	0.000607559
chr15	CGI7044	37209032	37209645	Grhl2	0.0476132	0.00354809	0.000607559
chr19	CGI10619	10797603	10797976	Cd5	0.284292	0	0.000607559
chr9	CGI22230	103021471	103021964	Rab6b	0.48947	0	0.000610493
chr2	CGI12743	167310662	167311043	Spata2	0.284179	0	0.00061124
chr17	CGI9559	84211499	84211929	Mta3	0.170653	0	0.00061124
chr5	CGI16568	123479037	123479719	Orai1	0.0556238	0.0056296	0.00061124
chr2	CGI12581	157577527	157578028	Ctnnbl1	0.113878	0.00555556	0.000614147
chr17	CGI9213	46223125	46223551		0.165954	0.00510204	0.000617042
chr4	CGI15507	155628364	155629555		0.0645744	0.001221	0.000655693
chr18	CGI10178	67632379	67632887	Slmo1	0.0476831	0.005	0.000658506
chr11	CGI4221	117721752	117722463	Tmem235	0.0815029	0.00333333	0.000660148
chr5	CGI16067	93370405	93372329	Shroom3	0.0193867	0.00785689	0.000660148
chr10	CGI1694	69467512	69468012	Ank3	0.121348	0.00292398	0.000666884
chr1	CGI1192	190537963	190538329	Ush2a	0.139236	0.00454696	0.000681475
chr12	CGI4914	87720620	87721006	Esrrb	0.287353	0.0245421	0.000699947
chr12	CGI4849	85122729	85123108	Papln	0.127629	0	0.000713187
chr9	CGI21693	45480563	45481120	Dscaml1	0.0457367	0.00358423	0.000713187
chr3	CGI13144	51407795	51408209		0.24492	0.00462963	0.000719772
chr6	CGI18009	125417191	125417617	Cd9	0.466564	0.00641026	0.000727717
chr11	CGI3760	98362557	98362930	Ikzf3	0.356753	0.00347222	0.000727717
chr4	CGI15459	154467009	154467420	Morn1	0.522523	0.0138889	0.000727717
chr17	CGI9637	88532219	88532721		0.102982	0	0.000738117
chr5	CGI16953	143168191	143168591		0.144366	0.00595238	0.000744603
chr11	CGI4207	117188248	117188619	Sept9	0.397901	0	0.000747195
chr18	CGI10275	77741013	77741385	Rnf165	0.41033	0.0198413	0.000800021
chr8	CGI21295	128548790	128549149	Kcnk1	0.170215	0	0.000806368
chr17	CGI8554	5091398	5091797	Arid1b	0.238435	0	0.000807174
chr7	CGI18984	51871382	51871783	Myh14	0.110523	0	0.000807174
chr8	CGI20216	28270855	28271299	Rab11fip1	0.19692	0	0.000807174
chr11	CGI3509	87952681	87953068	Cuedc1	0.0907163	0	0.000807174
chr16	CGI8520	96373262	96373633	Wrb	0.302647	0	0.000807174
chr4	CGI15365	150462668	150463188	Camta1	0.281689	0.0492028	0.000821081
chr3	CGI13761	121437031	121437382	F3	0.0865476	0.00452489	0.00083113
chr12	CGI5028	105714066	105714685		0.113608	0.00285714	0.00084495
chr2	CGI11470	31280665	31281017		0.178874	0.0105965	0.000854924
chr10	CGI1749	76058827	76059650	Col6a2	0.0515947	0.00555556	0.000887624
chr17	CGI9366	56742854	56743352	Safb	0.0898259	0.00834879	0.000897493
chr18	CGI9955	37999443	37999824	Pcdha4-g,Pcdhga1,Pcdhga10,Pcdhga11,Pcdhga12,Pcdhga2,Pcdhga3,Pcdhga4,Pcdhga5,Pcdhga6,Pcdhga7,Pcdhga8,Pcdhga9,Pcdhgb1,Pcdhgb2,Pcdhgb4,Pcdhgb5,Pcdhgb6,Pcdhgb7,Pcdhgb8,Pcdhgc3,Pcdhgc4,Pcdhgc5	0.283879	0.0113122	0.000899768
chr5	CGI16716	134691944	134693620	Gtf2ird2	0.0362283	0.00680813	0.000902035
chr4	CGI14888	128970547	128971503	Sync	0.0233837	0	0.000906546
chr5	CGI16263	112799406	112799856	Hps4	0.433003	0.00769231	0.000912546
chr11	CGI3702	97311219	97311609	Arhgap23	0.446306	0	0.000938833
chr1	CGI587	94775739	94776096	Ankmy1	0.415476	0	0.000938833
chr12	CGI5017	104427928	104428366		0.234291	0	0.000938833
chr4	CGI15307	147968089	147968492	Srm	0.612545	0	0.000938833
chr7	CGI19447	105682836	105683202		0.319312	0.00909091	0.000938833
chr3	CGI13099	37504662	37505097		0.297079	0	0.000938833
chr9	CGI22271	106549326	106550643	Grm2	0.0381337	0.00700805	0.000938833
chr11	CGI2881	53821184	53821556	Slc22a4	0.531717	0	0.000938833
chr12	CGI4811	81262655	81263097		0.0369519	0	0.000938833
chr1	CGI105	33796136	33796509	Rab23	0.38609	0	0.000938833
chr5	CGI16068	93393765	93394116	Shroom3	0.394511	0	0.000938833
chr6	CGI18012	125554084	125554465	Vwf	0.160169	0.00650794	0.000938833
chr11	CGI3570	94859263	94859642	Ppp1r9b	0.418254	0.010101	0.000944653
chr3	CGI13334	87546415	87547087	Lrrc71	0.0550929	0.00444444	0.000954124
chr10	CGI2271	120248949	120249417	Msrb3	0.076954	0.0025	0.000974555
chr11	CGI3521	88739459	88739901		0.0876585	0	0.000991262
chr19	CGI10899	44665416	44665796		0.357988	0	0.000998992
chr6	CGI17625	84524187	84524720	Cyp26b1	0.109584	0.0113263	0.000998992
chr8	CGI20078	10978400	10978919		0.0732653	0.00699301	0.00100142
chr7	CGI19966	149840090	149840455	Igf2	0.126177	0	0.00100142
chr15	CGI7782	101383435	101383855	4732456N10Rik,Krt85	0.14637	0	0.00100142
chr16	CGI8274	42313596	42314121	Gap43	0.0402689	0	0.00102155
chr8	CGI21137	122788584	122789053		0.138506	0	0.00102352
chr12	CGI5055	107246524	107246906		0.21387	0.0153846	0.00102549
chr5	CGI16538	122398477	122398966	Cux2	0.0826403	0.0047619	0.00102746
chr7	CGI18571	25779099	25780036	Atp1a3	0.0285425	0	0.00102942
chr15	CGI7773	101061441	101062683	Grasp	0.0451742	0.00954416	0.00103496
chr3	CGI13098	37380241	37380597	Spata5	0.0271008	0	0.00104767
chr16	CGI8483	93653170	93653714		0.0541839	0	0.00105317
chr5	CGI16941	142572497	142572964	Sdk1	0.325802	0.0122354	0.00111587
chr4	CGI14515	103235644	103236109		0.131688	0	0.00112124
chr12	CGI4993	102182977	102183385	Ccdc88c	0.366805	0.0456439	0.00112303
chr17	CGI8556	5341760	5342848	Arid1b	0.0386917	0.00740294	0.00114618
chr17	CGI8551	4854006	4854436		0.0855165	0.00549451	0.0011728
chr6	CGI17875	115741983	115742772	Cand2	0.0803651	0.0104167	0.0011745
chr17	CGI9191	45683653	45684155	Tmem151b	0.0709032	0.00753205	0.0011762
chr15	CGI7789	101754496	101755182	Krt4	0.0318917	0	0.00117789
chr15	CGI7786	101647994	101648603	Krt2	0.0868912	0.00854701	0.00118311
chr9	CGI21683	44855086	44855513	Mpzl2	0.0686973	0.00208333	0.00120405
chr4	CGI15204	140577433	140577788	Crocc	0.429664	0.00826446	0.00121624
chr4	CGI15462	154588966	154589325	Ski	0.385637	0.00454545	0.00121785
chr4	CGI15118	136337858	136338261	Ephb2	0.726947	0.00757576	0.0012186
chr1	CGI1097	181521780	181522155	Cnst	0.557857	0.00568182	0.0012186
chr11	CGI3799	99291986	99292365	Krt20	0.361838	0.00568182	0.0012186
chr12	CGI5091	110064865	110065542	Slc25a29	0.0652356	0.012517	0.0012186
chr11	CGI2537	5533956	5534652	Ankrd36	0.0534491	0.00163399	0.0012186
chr1	CGI658	121538973	121539359	Epb4.1l5	0.316501	0.00534759	0.0012186
chr2	CGI12722	166450716	166451138	Prex1	0.499199	0.00649351	0.0012186
chr14	CGI6740	75727407	75727988	Zc3h13	0.0840359	0.00446429	0.00122366
chr3	CGI13724	115415038	115415569	S1pr1	0.0762607	0.00854701	0.00125639
chr6	CGI18165	146400936	146401411	Itpr2	0.139217	0.00420168	0.00125792
chr6	CGI17855	113698243	113699035	Atp2b2	0.0282498	0	0.0012629
chr17	CGI8729	24733666	24734026	Tsc2	0.476476	0	0.00128656
chr11	CGI2947	58795400	58795767	Trim11	0.268249	0	0.00128656
chr6	CGI17640	85173821	85174191	Sfxn5	0.232667	0	0.0012895
chr14	CGI6874	120729696	120730058	Mbnl2	0.104	0	0.0012895
chr13	CGI5973	96238431	96238985		0.0489379	0	0.00129097
chr8	CGI20312	47293696	47294072	Slc25a4	0.445617	0	0.00129388
chr19	CGI10944	45237578	45237929		0.181171	0.00230415	0.00129388
chr17	CGI9607	86657092	86658001	Prkce	0.0664596	0	0.00130215
chr5	CGI16517	121453797	121454214	Rph3a	0.180124	0	0.00132741
chr10	CGI2263	119740898	119741492		0.13008	0.00641026	0.00133221
chr4	CGI15103	135774562	135774931	Asap3	0.25922	0.00961538	0.00133498
chr8	CGI20692	87035452	87035881	Cacna1a	0.473893	0.0192308	0.00133498
chr11	CGI3908	102079707	102080198	Hdac5	0.136942	0.00462963	0.00136004
chr4	CGI14101	32568252	32568711	Bach2	0.160842	0.00277778	0.00136138
chr2	CGI12457	152512421	152513169	H13,Mcts2	0.0251697	0.00123457	0.00136946
chr16	CGI8277	43618391	43618949	Zbtb20	0.0531817	0.00843254	0.00137546
chr2	CGI12305	132199091	132199847	Prokr2	0.0698961	0.0128571	0.00137546
chr1	CGI539	90151338	90151726	Heatr7b1	0.184954	0.0358366	0.00138013
chr3	CGI13388	88447788	88448229	Arhgef2	0.0439477	0.0025641	0.00139277
chr8	CGI20148	23368750	23369232	Thsd1	0.0559479	0	0.00139277
chr14	CGI6890	122766414	122766784	Clybl,Gm5089	0.0723677	0	0.00139404
chr8	CGI20161	24144228	24144719	Ank1	0.086009	0	0.00140533
chr10	CGI1944	80610482	80611507	Zbtb7a	0.0291317	0	0.00140658
chr4	CGI14847	127003261	127004058	Gjb3	0.0671268	0.00912247	0.00141449
chr2	CGI11504	32203962	32204358	Dnm1	0.227659	0.0166976	0.00141905
chr11	CGI3973	103591794	103592611	Wnt9b	0.0488129	0.00448718	0.00143687
chr18	CGI10320	82723928	82724490	Mbp	0.0626539	0.00404858	0.00144139
chr7	CGI18597	26148106	26148467	Megf8	0.200952	0.00947982	0.00144589
chr13	CGI5976	96373741	96374852	F2r	0.0448327	0.00423387	0.00146359
chr2	CGI12551	156320621	156320981	Epb4.1l1	0.592383	0.020202	0.00146804
chr7	CGI18327	13556000	13557041	Zfp324	0.0371971	0.00392157	0.00146919
chr17	CGI8836	27262132	27262500	2900010M23Rik	0.401959	0.0147727	0.00147034
chr2	CGI12627	162930189	162930613		0.338023	0.00749923	0.00147476
chr7	CGI19503	108521480	108521891	Arap1	0.0672707	0	0.00150213
chr15	CGI7465	84545147	84545593	Gm20556	0.120987	0.0110294	0.00150322
chr17	CGI8768	25676562	25676953		0.156263	0.00735294	0.00152721
chr9	CGI21449	21443591	21443942	Smarca4	0.521131	0.030303	0.0015314
chr2	CGI12446	152186427	152186822	Gm14164	0.194599	0.00865801	0.0015314
chr10	CGI1762	77126509	77127540		0.0361535	0.00217865	0.0015314
chr5	CGI16298	114177257	114177623		0.231589	0.00649351	0.0015314
chr15	CGI7490	85508765	85509135		0.36066	0.0113636	0.00153568
chr11	CGI3267	75328596	75329346	Scarf1	0.0617566	0.00665266	0.00153671
chr6	CGI18106	136676636	136677033	Gucy2c	0.292915	0.00909091	0.00156364
chr7	CGI19294	86609398	86612187	Polg	0.008464	0	0.00156463
chr1	CGI1042	174248163	174248838	Igsf8	0.0489432	0.00378788	0.00156562
chr14	CGI6322	34767761	34768158	Rbp3	0.086544	0	0.00159884
chr15	CGI7291	78369703	78370785	Sstr3	0.0430692	0.00737956	0.00161265
chr7	CGI18788	31082273	31082632	Clip3	0.0803952	0	0.00168106
chr4	CGI14374	63678072	63679190	Tnc	0.0491178	0.00820751	0.0016915
chr4	CGI15059	134609491	134609927		0.572403	0.0181818	0.0016923
chr2	CGI12625	162873753	162874144		0.252729	0.018701	0.00169469
chr15	CGI7500	85965810	85966162	Gramd4	0.347621	0.023416	0.00169469
chr9	CGI22054	77317667	77318043	Lrrc1	0.457719	0.0265152	0.00169469
chr3	CGI13519	95539636	95539994	Ecm1	0.0922744	0.00625	0.0017401
chr7	CGI18272	4981048	4983913	Zfp865	0.015288	0.0038456	0.00174082
chr4	CGI14767	123913732	123914133		0.180405	0	0.00175425
chr15	CGI7582	93333526	93334337	Prickle1	0.0361747	0	0.00176448
chr6	CGI17386	49345205	49346036	Stk31	0.0537033	0.00512733	0.00178167
chr14	CGI6263	29331213	29331902	Wnt5a	0.0368541	0	0.0018013
chr8	CGI21279	127470127	127470598	Egln1	0.119983	0.00909091	0.0018114
chr4	CGI14881	128900607	128901812	C77080	0.0404708	0.00669822	0.00182777
chr10	CGI2397	127826213	127826568	Ankrd52	0.124896	0	0.00183466
chr1	CGI1209	192505884	192506405		0.104755	0.00793651	0.00188604
chr2	CGI11709	69218463	69218838	Dhrs9	0.356847	0.0194805	0.00188604
chr10	CGI1958	80707207	80707616	Zfr2	0.153758	0.0178571	0.00192102
chr4	CGI14983	132578039	132578438	Ahdc1	0.174272	0.00392157	0.00192148
chr6	CGI17793	100750520	100750888	Gxylt2	0.37303	0	0.00192506
chr10	CGI1816	79328543	79329022	BC005764	0.089124	0.00526316	0.00192552
chr17	CGI9623	87729374	87729969	Ttc7	0.132224	0.00714286	0.00193844
chr14	CGI6233	25009454	25009816	Dlg5	0.403142	0	0.00195443
chr7	CGI19833	139980441	139980820	Fam53b	0.60951	0	0.00195485
chr11	CGI4242	118768413	118771681	Rbfox3	0.0118331	0.00147783	0.00195957
chr19	CGI10407	4745695	4746055	Spnb3	0.572693	0	0.00195957
chr11	CGI4287	119983542	119983907	Slc38a10	0.521288	0	0.00195957
chr11	CGI4022	106175567	106175931	Cd79b	0.366342	0	0.00195957
chr8	CGI20933	107991688	107992631	Tppp3	0.0509165	0.00213675	0.00195998
chr17	CGI8760	25385173	25385608	Baiap3	0.463825	0	0.00196157
chr13	CGI6099	113534496	113534867		0.181557	0	0.00196157
chr5	CGI16678	130236150	130236523	Gbas	0.354916	0	0.00196157
chr15	CGI7363	79926822	79927201	Syngr1	0.40731	0	0.00196157
chr10	CGI1316	13459704	13460079	Aig1	0.311192	0.00769231	0.00196849
chr17	CGI8696	23943724	23944312	Srrm2	0.0385031	0.00333333	0.00196849
chr16	CGI8487	93769920	93770271	Dopey2	0.325552	0.0162393	0.00196887
chr7	CGI18357	16730018	16731052	Slc8a2	0.0314534	0	0.00198453
chr11	CGI3440	84574308	84574681		0.237074	0	0.00200318
chr7	CGI18200	3284860	3285240		0.0650174	0	0.00201266
chr2	CGI12488	153334938	153335303	8430427H17Rik	0.137443	0	0.0020133
chr3	CGI13899	144224510	144224913	Hs2st1	0.193814	0	0.0020133
chr1	CGI1055	174456777	174457247	Ccdc19	0.0517016	0	0.00201666
chr14	CGI6818	104101637	104102143	Slain1	0.0411398	0	0.00202303
chr6	CGI18078	134819595	134820378	Gpr19	0.0556115	0.0105669	0.00204479
chr5	CGI16378	115966087	115966609	Pxn	0.111365	0.0196488	0.00204479
chr11	CGI4084	113813047	113813414	Sdk2	0.242754	0.00641026	0.00206619
chr1	CGI1096	181475711	181477238	Cnst,Tfb2m	0.0139901	0.00344753	0.00211765
chr9	CGI21618	42132774	42133304		0.0747101	0.00446429	0.00219003
chr9	CGI21531	31373987	31374506		0.0530448	0.00507937	0.00220814
chr15	CGI7759	100766491	100767095	Scn8a	0.037683	0	0.0022112
chrX	CGI22580	7387292	7387654	Gripap1	0.096957	0	0.00224125
chr9	CGI22182	98756698	98757176	Gm6406	0.0501319	0.00654762	0.00224125
chr14	CGI6741	75925451	75926061	Siah3	0.059064	0	0.00224125
chr4	CGI15117	136326687	136327674	Ephb2	0.067078	0.0130132	0.00225618
chr10	CGI2005	81056786	81057283	Tle6	0.124612	0.0154968	0.00226511
chr15	CGI7709	99300577	99301341	Bcdin3d	0.0504081	0.00370813	0.00226806
chr2	CGI11997	104412949	104413341		0.0558014	0.00961538	0.00233038
chr5	CGI16262	112798975	112799347	Hps4	0.403337	0.0103981	0.00234782
chr11	CGI3494	87430220	87431609	Hsf5	0.0293451	0.00446281	0.00234782
chr5	CGI15904	66417254	66418609	Rbm47	0.0244685	0.00233269	0.00234782
chr1	CGI808	138121736	138122199	5730559C18Rik	0.0665399	0.00454545	0.0023536
chr6	CGI18149	143342812	143343389		0.0549385	0.00289855	0.00235923
chr4	CGI15332	149096569	149096933	Tmem201	0.464374	0.0311688	0.00235923
chr11	CGI4283	119884076	119884497	Aatk	0.44882	0.0489418	0.00236204
chr11	CGI3705	97361128	97362869	Arhgap23	0.0420306	0.00549108	0.00238246
chr10	CGI2095	89512458	89513037	Anks1b	0.0508724	0.00663206	0.00240283
chr17	CGI9579	85581261	85581645	Camkmt	0.117014	0	0.00242021
chr2	CGI11358	26517799	26518290		0.056261	0	0.00243439
chr5	CGI16055	92705822	92706310	Naaa	0.033816	0	0.00243439
chr8	CGI21270	127054057	127054456	Cog2	0.500615	0	0.00246334
chr15	CGI7597	95778491	95779297	Ano6	0.026321	0	0.00246599
chr2	CGI11353	26371870	26372300		0.158972	0.00826446	0.00246862
chr8	CGI21170	123595329	123595694	1110050K14Rik	0.421063	0.00526316	0.00250905
chr12	CGI5108	111213815	111214208		0.475482	0.02	0.00252324
chr11	CGI3804	100002238	100002624	Krt19	0.159658	0.00820136	0.00252869
chr11	CGI4281	119872914	119873813	Aatk	0.0514596	0	0.00254861
chr11	CGI3783	98809191	98809640	Rara	0.51194	0.0369075	0.00255112
chr18	CGI9848	36015125	36015610	Cxxc5	0.14019	0.00378788	0.00256518
chr11	CGI2811	50067459	50067876		0.172973	0.0121528	0.00256767
chr5	CGI16915	140432923	140433297	Elfn1	0.522756	0.0141612	0.00257591
chr18	CGI10020	46516134	46516767		0.0767984	0.0127912	0.00257837
chr12	CGI4919	87859643	87860147	Esrrb	0.143336	0.00478469	0.00258371
chr3	CGI13594	97555508	97555959	Pde4dip	0.0821332	0.016	0.00260338
chr3	CGI13601	97828256	97828616	Notch2	0.387439	0	0.00263733
chr7	CGI19765	134910875	134911477	Fbxl19	0.081126	0.00574713	0.00264257
chr5	CGI16497	120931298	120931724	Sds	0.150972	0	0.00264494
chr8	CGI21105	120225790	120226159	Hsd17b2	0.288969	0	0.00264915
chr1	CGI1244	195156149	195156564	Lamb3	0.278064	0	0.00264915
chr13	CGI5970	96105948	96106741	Zbed3	0.0288423	0	0.00264915
chr15	CGI6974	25827376	25827837	Fam134b	0.310228	0.00549451	0.00266572
chr6	CGI17977	124811027	124811554	Gpr162	0.0906776	0.0107143	0.0026794
chr12	CGI4921	88029847	88030390	Vash1	0.0611967	0.00287356	0.00273846
chr17	CGI8835	27258135	27258546	Itpr3	0.0695195	0	0.00277186
chr7	CGI19114	53354347	53354781	Kcnj11	0.0840214	0.00992063	0.00278752
chr7	CGI19531	112378384	112378801		0.0903208	0	0.00279532
chr5	CGI15903	66410309	66410801	Rbm47	0.0629261	0	0.00279746
chr12	CGI4572	41570659	41571242	Dock4	0.0490013	0	0.0027996
chr6	CGI17195	23152769	23153129		0.109848	0.00769231	0.00280736
chr6	CGI17270	31234907	31235542	2210408F21Rik	0.0446348	0.0025	0.0028179
chr9	CGI21877	60929434	60929790		0.169546	0.00438596	0.00282562
chr18	CGI9776	25636808	25637256	Celf4	0.0393754	0.00198413	0.00288096
chr4	CGI14230	45155418	45155798		0.221147	0.0140306	0.00290456
chr4	CGI15055	134499801	134500202		0.216639	0.0107937	0.00290456
chr7	CGI19823	138771743	138772136		0.0645739	0.00555556	0.00291968
chr6	CGI17756	93628314	93629118	Magi1	0.0223719	0.00178891	0.00291968
chr3	CGI13051	31061842	31062321	Cldn11	0.0562484	0.00925926	0.00302191
chr2	CGI12555	156508815	156509176	Dlgap4	0.500503	0.0142857	0.00304043
chr8	CGI21004	111262101	111262493	Zfhx3	0.527448	0.0171795	0.00305613
chr7	CGI19769	134945829	134946218	Hsd3b7	0.18517	0.00665266	0.00306624
chr15	CGI7545	89240286	89240913	Syce3	0.0552649	0.00297619	0.00308464
chr18	CGI9990	42361995	42362761	Lars	0.0508015	0.00460829	0.00310299
chr8	CGI20451	72853677	72855832	Gdf1,Lass1,Upf1	0.022309	0.00360501	0.00311577
chr11	CGI3942	102757943	102758552	Gfap	0.0450422	0.00175439	0.00313405
chr11	CGI4238	118464441	118465003	Rbfox3	0.0878694	0.00350877	0.00316331
chr10	CGI1636	62275428	62275851	Tet1	0.0818892	0	0.00317371
chr6	CGI18031	127034770	127035237	9630033F20Rik	0.0401713	0	0.00317371
chr12	CGI5065	107752495	107753040		0.0352654	0	0.00317371
chr11	CGI3519	88639229	88639666		0.0438081	0	0.00317534
chr16	CGI8184	32143233	32143754	Lrrc33	0.0672789	0	0.00317696
chr1	CGI212	43089015	43090056	Gpr45	0.0273296	0	0.00317857
chr1	CGI381	74440295	74440732	Ctdsp1	0.179798	0.00714286	0.00320364
chr17	CGI9306	50747598	50747996	Plcl2	0.0498738	0.00181159	0.00320364
chr18	CGI10314	81407648	81408020		0.322311	0.00529101	0.00322859
chr10	CGI2118	93308510	93309515	Usp44	0.0218824	0.0030303	0.00322859
chr9	CGI21884	61604688	61605078		0.091145	0.0107323	0.00331993
chr3	CGI13689	107937691	107938043	Gnai3	0.499255	0	0.0033268
chr2	CGI12815	171926041	171926425		0.0678672	0	0.00337033
chr12	CGI4722	72418902	72419999	Dact1	0.020871	0.00313541	0.00337033
chr3	CGI13511	95214911	95215283		0.0695321	0.013369	0.00337033
chr9	CGI21371	15297404	15298990		0.0199602	0.000706215	0.00337033
chr6	CGI17705	88726601	88726958	Mgll	0.224034	0	0.00337169
chr5	CGI16910	140369818	140370180		0.257609	0	0.00338115
chr9	CGI21663	44297718	44298430		0.0748903	0	0.00340675
chr2	CGI11399	28885347	28885761	1700101E01Rik	0.152982	0.0204082	0.0034296
chr11	CGI2749	43304266	43304916	C1qtnf2	0.0274264	0.00252525	0.00344023
chr17	CGI8563	5886904	5887261	Snx9	0.508476	0.0272727	0.00344954
chr4	CGI15377	151255844	151256368		0.0485825	0	0.00345616
chr6	CGI18024	126688147	126688844	Kcna6	0.0710344	0.0113445	0.00348659
chr16	CGI8312	50668588	50669112		0.0336003	0	0.00348659
chr2	CGI12127	119574918	119575734	Itpka	0.0368024	0	0.00348659
chr11	CGI3537	91437852	91438391	Kif2b	0.0545029	0.0115261	0.00348779
chr9	CGI22172	96895815	96896761	Spsb4	0.0176765	0	0.00349432
chr4	CGI15312	148248021	148248617	Casz1	0.0390129	0	0.00351414
chr8	CGI20327	48477674	48478034		0.105626	0.00980392	0.00353391
chr15	CGI7720	99502139	99502643	Accn2	0.154946	0.0117647	0.00354302
chr14	CGI6295	32498708	32499151		0.23521	0.0277778	0.00355475
chr3	CGI13829	130602955	130603686		0.0310355	0	0.00363795
chr11	CGI3984	104030976	104031706	Crhr1	0.0426911	0.0020202	0.00364162
chr18	CGI9901	37456009	37456774	Pcdha4-g,Pcdhb2	0.0255606	0	0.00364364
chr8	CGI20893	106623449	106624315		0.0425247	0	0.00364364
chr9	CGI21376	15726755	15727356	Fat3	0.0350334	0	0.00391609
chr11	CGI3558	94425725	94426933	Acsf2,Chad	0.0218999	0	0.00392467
chr3	CGI13162	53254500	53255054		0.387479	0.0134865	0.00396216
chr19	CGI10679	21867100	21867535	Tmem2	0.0422798	0.00333333	0.00407572
chr12	CGI4861	85495680	85496061	C130039O16Rik	0.334127	0	0.00411032
chr19	CGI10518	6420513	6420907	Nrxn2	0.194293	0	0.00416477
chr6	CGI17750	92325966	92326736	Prickle2	0.0501873	0	0.00416477
chr11	CGI2809	50048063	50048448	Mgat4b	0.0658358	0	0.00416477
chr4	CGI15414	151822312	151822681	Kcnab2	0.395389	0	0.00416477
chr10	CGI1254	3139009	3139373	Cnksr3	0.112091	0	0.00416477
chr7	CGI19340	87927011	87927379	Iqgap1	0.315021	0	0.00418414
chr2	CGI11376	27355199	27355846		0.252674	0	0.00418414
chr1	CGI753	135632708	135633082	Atp2b4	0.380442	0	0.00418414
chr15	CGI7217	76025855	76026246	Plec	0.142556	0.0182073	0.00424422
chr14	CGI6761	77574266	77574670	Enox1	0.170797	0.00324675	0.0042523
chr2	CGI12720	166334770	166335252		0.0630281	0	0.00425518
chr15	CGI6972	25710655	25711741	Myo10	0.0246244	0.00650161	0.00443655
chr17	CGI9226	46590970	46591655	Ttbk1	0.0383299	0	0.00443922
chr11	CGI2444	3049495	3051686	Sfi1	0.300675	0.170087	0.00456318
chr6	CGI17891	117821236	117821934	Zfp239	0.0348931	0.0042489	0.00468686
chr10	CGI1494	42480882	42482393	Sec63	0.0120163	0	0.00469438
chr3	CGI13191	55586440	55588145	Mab21l1,Nbea	0.0126463	0	0.00469931
chr13	CGI6097	113441941	113442916	Ddx4	0.0282063	0.0064252	0.00472221
chr8	CGI21232	125293050	125293526		0.117707	0.00520833	0.00475533
chr16	CGI8227	35659535	35660920	Sema5b	0.0156255	0.000718391	0.0048704
chr19	CGI11081	55804211	55804699		0.121214	0.00833333	0.00487254
chr17	CGI8677	23746392	23747984	Zscan10	0.0223074	0.00588316	0.00489259
chr7	CGI18556	25424948	25425417	Lypd3	0.107073	0	0.00489726
chr14	CGI6543	58160921	58161702	Il17d	0.0222541	0.00252525	0.00490447
chr8	CGI20559	74192034	74192544	Unc13a	0.0976897	0	0.00490912
chr14	CGI6470	55272226	55272589	4930579G18Rik,Acin1	0.0817087	0	0.00492649
chr13	CGI5463	38256612	38256980	Dsp	0.162274	0	0.00493364
chr15	CGI7575	92599888	92600692	Pdzrn4	0.0639092	0.00285714	0.00495348
chr10	CGI1913	80296942	80299008	Lingo3	0.0167055	0.00501358	0.0049682
chr9	CGI21702	46077961	46078671	Apoa5	0.0352548	0	0.00497275
chr9	CGI22267	106364717	106365077	Pcbp4	0.145928	0.0195416	0.00499755
chr15	CGI7617	97084035	97084617	Pced1b	0.0508229	0.00696286	0.00502423
chr17	CGI8647	17986763	17987708	Has1	0.0211256	0.0014881	0.00502423
chr2	CGI12817	172074558	172075580	Mc3r	0.0417654	0.0115288	0.00522218
chr4	CGI15036	133912884	133913797	Extl1	0.0212821	0	0.00522218
chr8	CGI21203	124233056	124233488		0.0614394	0.00555556	0.0052239
chr13	CGI6115	114660599	114661104	Arl15	0.0856275	0.00241546	0.00530106
chr11	CGI2438	3039124	3040346	Sfi1	0.284138	0.0375385	0.00531022
chr19	CGI10978	45917959	45918349	9130011E15Rik	0.654248	0.00444444	0.00531344
chr16	CGI8477	92801780	92802167	Runx1	0.209901	0.0277778	0.00531344
chr7	CGI18947	51193542	51194108	Klk15	0.025778	0	0.0053501
chr11	CGI2726	35521317	35521775	Slit3	0.0269006	0	0.00536167
chr16	CGI8412	89917732	89918108	Tiam1	0.114015	0.00967262	0.00536975
chr2	CGI12565	156865552	156866740	9830001H06Rik	0.0195753	0.00450549	0.00536975
chr8	CGI21142	122917784	122918181		0.466675	0.00793651	0.00537129
chr8	CGI20867	97673354	97673719		0.282143	0	0.00546245
chr2	CGI11511	32350950	32351312		0.0517058	0	0.00548378
chr5	CGI15954	73462580	73462942	Fryl	0.147466	0.00961538	0.0056566
chr9	CGI22127	89774382	89774897		0.141789	0.022314	0.00565897
chr10	CGI2391	127720261	127720843	Stat2	0.0473924	0	0.00565897
chr16	CGI8415	89959207	89959574	Tiam1	0.331158	0	0.00565897
chr1	CGI872	155881135	155881487		0.478202	0	0.00565897
chr13	CGI5509	43286985	43287354		0.212105	0	0.00567125
chr17	CGI8890	28670324	28670716	4930511I11Rik	0.100411	0	0.00567125
chr4	CGI15104	135794198	135794729	Asap3	0.0692251	0	0.00568723
chr8	CGI20423	72404526	72407504	Cilp2	0.0118774	0.00298589	0.00581995
chr10	CGI1950	80639010	80641021	Eef2	0.0466707	0.00997111	0.00585537
chr9	CGI22450	117811274	117811707		0.145918	0.0178571	0.00595208
chr19	CGI10523	6549466	6549821		0.381856	0.0401923	0.00597748
chr9	CGI22465	118984797	118985598	Plcd1	0.0417004	0.00555556	0.006042
chr3	CGI13539	95988813	95989541	Sv2a	0.057192	0.00533662	0.00605012
chr13	CGI5807	67964218	67964827	BC048507	0.0815765	0.00274725	0.00605578
chr11	CGI3618	96031990	96032462		0.0989691	0.00452489	0.00607607
chr10	CGI2296	121187316	121187836	BC048403	0.0408277	0	0.00626702
chr3	CGI13934	150178706	150179282		0.0360395	0	0.00632358
chr4	CGI15399	151544598	151545107		0.0373382	0.00307692	0.00634351
chr2	CGI12863	174282277	174283145	Tubb1	0.0513897	0.0103897	0.00634882
chr4	CGI15151	137950354	137952648	Fam43b	0.00874022	0.000527426	0.00636141
chr4	CGI15025	133628610	133629292	Aim1l	0.0403224	0.00183824	0.00647098
chr14	CGI6694	70866573	70867192	Phyhip	0.0583229	0.00363636	0.00660939
chr14	CGI6597	63644191	63644779		0.0468307	0.00363636	0.00660955
chr14	CGI6433	52616558	52617675	Arhgef40	0.0311538	0.00297619	0.00663147
chr9	CGI21633	43672043	43672525		0.0826259	0	0.0066799
chr13	CGI5946	94498010	94498449	Dmgdh	0.0636962	0.00480769	0.00699335
chr15	CGI6938	8992590	8992964	Ranbp3l	0.0662441	0.00568182	0.00699792
chr16	CGI8221	35153997	35157373	Adcy5	0.00900155	0.000672043	0.00700488
chr1	CGI918	162281875	162282354	Rabgap1l	0.0700724	0	0.00714353
chr3	CGI13259	69093706	69094112		0.0975048	0.00714286	0.00714353
chr7	CGI19140	56376282	56376669	Nav2	0.108364	0	0.0071623
chr4	CGI14140	40428297	40428870		0.0271274	0	0.00719015
chr15	CGI7695	98925152	98925805		0.0556224	0	0.00719015
chr7	CGI19492	108086609	108087876	P2ry6	0.0307626	0.0049416	0.00720642
chr7	CGI19085	52997683	52998223	Sult2b1	0.0743806	0.003125	0.00725368
chr12	CGI5107	110787822	110788295	Meg3	0.0579398	0.00568182	0.00725687
chr7	CGI19142	56505300	56505690	Nav2	0.154913	0	0.00725687
chr5	CGI16816	137613777	137614317		0.0563569	0.0042735	0.00725687
chr13	CGI5754	60862305	60862678	Dapk1	0.0917452	0.0104686	0.00733241
chr18	CGI10104	61225252	61225630	Pdgfrb	0.0929806	0.00755735	0.00735317
chr18	CGI10230	75438866	75439277	Dym	0.584244	0	0.00735729
chr7	CGI18507	20281770	20282527	Apoe	0.0339024	0.00680272	0.00741353
chr9	CGI21667	44390512	44390934		0.26561	0.0110399	0.00742941
chr11	CGI2723	34107476	34108135	Foxi1	0.0479368	0.004	0.0074358
chr5	CGI16101	100334967	100335823		0.0537063	0.00521978	0.00749886
chr7	CGI18534	25117988	25119154	1700008P20Rik	0.0268723	0.00124069	0.00763257
chr5	CGI16396	116894348	116894968	2410137F16Rik,Srrm4	0.0560405	0.00332633	0.00767172
chr9	CGI22323	108007455	108008117	Bsn	0.0739198	0.0159933	0.00773097
chr11	CGI3545	94075066	94075523	Tob1	0.0970522	0.0208333	0.00773097
chr17	CGI8767	25655049	25655607		0.11902	0.00701754	0.0077511
chr6	CGI17930	120908213	120909163	Mical3	0.0270303	0.00208333	0.00778997
chr1	CGI137	36325456	36326821	Neurl3	0.0166285	0.00243386	0.00779828
chr2	CGI11374	27353666	27354081		0.282464	0.0363636	0.00783936
chr4	CGI14987	132648316	132648874		0.0363732	0	0.00785929
chr9	CGI22298	107500881	107501716	Sema3b	0.0479961	0.00497232	0.00797125
chr17	CGI8902	29036152	29036985	4930539E08Rik	0.0544486	0.00988748	0.00797125
chr15	CGI7689	98870437	98870901		0.0542083	0	0.00797125
chr14	CGI6723	73637809	73638466	Lpar6,Rb1	0.0429346	0.0025641	0.00797125
chr19	CGI11054	53258775	53259149	Add3	0.391314	0.0312983	0.00815854
chr4	CGI15297	147539660	147541197	Fbxo2	0.0149566	0	0.00831056
chr18	CGI9701	10532647	10533131	Greb1l	0.0360415	0	0.00846924
chr10	CGI1331	18150630	18151139	Nhsl1	0.0550566	0	0.00850513
chr19	CGI10621	10873681	10874103	Cd6	0.0357219	0	0.00850513
chr12	CGI4379	4744806	4745394	4930417G10Rik	0.0343211	0	0.00850566
chr9	CGI21937	64970342	64970795	Igdcc4	0.0417797	0	0.00851774
chr8	CGI20927	107860206	107860972	Fhod1	0.0359698	0.00210084	0.00861069
chr5	CGI16902	140208609	140208965	Micall2	0.230431	0.0181818	0.00866882
chr9	CGI21869	60136815	60137212	Thsd4	0.0557146	0.00390625	0.00874066
chr3	CGI13316	84536073	84536469		0.122834	0	0.00878058
chr7	CGI19197	71346634	71347052	Trpm1	0.0730234	0.00392157	0.00878058
chr8	CGI20096	12428294	12428656	Gm5607	0.164375	0	0.00878058
chr19	CGI10512	6389491	6390235	Pygm	0.0524525	0.00333333	0.00878082
chr12	CGI4546	33987632	33988078	Atxn7l1	0.153103	0	0.00883612
chr5	CGI16937	141420255	141420612	Card11	0.291667	0	0.00887985
chr18	CGI10272	77680091	77680695	Loxhd1	0.0354397	0.014881	0.00890518
chr1	CGI169	37932004	37932787	Lipt1	0.0583398	0.0110501	0.00890529
chr1	CGI858	154577859	154578214		0.0736264	0	0.00897395
chr19	CGI10677	21816489	21817066		0.0427879	0.00194932	0.00906759
chr7	CGI18218	3580249	3580701	Tfpt	0.0475823	0	0.00910402
chr17	CGI9317	53718016	53718411	Kat2b	0.35	0	0.00911739
chr2	CGI12920	181026554	181027241		0.27788	0.0365981	0.00911739
chr11	CGI3504	87681903	87682343	Epx	0.0471965	0	0.00911739
chr10	CGI2305	122237347	122237740	Ppm1h	0.160651	0	0.00925584
chr2	CGI12731	166927565	166928660	Kcnb1	0.0364826	0.00465587	0.00927148
chr12	CGI4784	77777402	77777760	Spnb1	0.0673133	0	0.00927348
chr8	CGI20617	81154283	81154644	Slc10a7	0.560944	0	0.00928228
chr7	CGI19918	148285464	148286755	Sigirr	0.0150565	0.000892857	0.00946299
chr2	CGI11754	71877076	71877458	Rapgef4	0.193313	0.0201923	0.0095552
chr19	CGI10691	24205366	24205875	Tjp2	0.021298	0	0.00963018
chr15	CGI7301	78651029	78651451		0.0446766	0.00378788	0.00963018
chr7	CGI18429	19599738	19600185	Foxa3	0.068837	0	0.00963018
chr1	CGI764	136194886	136196346	Ppfia4	0.0214772	0	0.00966107
chr19	CGI11000	46442261	46442844	Tmem180	0.0445643	0	0.00968741
chr2	CGI12811	170586499	170587093	Dok5	0.029946	0.0034965	0.00982602
chr7	CGI19079	52949115	52950019	Ntn5,Sec1	0.034697	0.00300752	0.00987458
chr7	CGI19977	150515377	150515792	4933417O13Rik,Kcnq1	0.136968	0.0143335	0.0101136
chr5	CGI16689	130473585	130474199	Gusb	0.0356034	0	0.0101718
chr17	CGI9432	66766393	66766768	1110012J17Rik	0.142192	0	0.0101718
chr6	CGI17454	53663243	53663624		0.402763	0.0277778	0.0102042
chr6	CGI17379	48855532	48855930	Abp1	0.0602557	0	0.0102164
chr13	CGI5980	96759545	96760161	Sv2c	0.0527359	0	0.0102688
chr1	CGI90	24601936	24602473		0.0532448	0.00666667	0.0102965
chr3	CGI13143	51376474	51377172		0.0414141	0	0.010371
chr16	CGI7955	10783917	10786371	Socs1	0.0126999	0	0.0104119
chr8	CGI20402	70984915	70985445	Csgalnact1	0.0274713	0.00412641	0.0106527
chr11	CGI4234	118284823	118285234		0.116085	0	0.0106555
chr17	CGI8817	26973866	26974445		0.106197	0.00416667	0.0106805
chr15	CGI7762	100869789	100871304	Scn8a	0.032578	0.00604052	0.0107586
chr8	CGI21162	123371671	123372052		0.186846	0.0203963	0.0108162
chr6	CGI17153	8678747	8679203	Ica1	0.0427749	0	0.0108162
chr7	CGI18637	28104327	28104846	Ltbp4	0.0309264	0	0.0108162
chr4	CGI14970	132289272	132289801	Smpdl3b	0.0317694	0	0.0108162
chr11	CGI2481	3402060	3402632	Inpp5j	0.0499744	0	0.0108162
chr7	CGI19927	148451780	148452414	Irf7	0.0870472	0.00277778	0.0108233
chr4	CGI14314	55362237	55363797	Rad23b	0.00766868	0.002	0.0108809
chr6	CGI18014	125661227	125661619	Ano2	0.100406	0.0151786	0.0109978
chr1	CGI215	43180217	43180926	Fhl2	0.0303491	0.00240385	0.0112133
chr16	CGI8437	91056845	91057202	4932438H23Rik	0.320868	0.00833333	0.0112265
chr2	CGI11845	79474980	79476524	Ssfa2	0.00844979	0.00126103	0.0112616
chr16	CGI8140	28827850	28828381	Mb21d2	0.0320185	0	0.011336
chr4	CGI15214	140804878	140805481	Arhgef19	0.0378155	0	0.011336
chr15	CGI7853	102809252	102809623	Hoxc9	0.0981122	0.0132527	0.011349
chr4	CGI15452	154334079	154336098	Hes5	0.013691	0.00216412	0.0113861
chr10	CGI1664	66648360	66648761	Jmjd1c	0.0759876	0.003125	0.0114012
chr14	CGI6767	78860721	78861097		0.0758744	0.00549451	0.0115536
chr3	CGI13372	88156782	88157162	Smg5	0.431109	0.0125	0.0115621
chr7	CGI19685	133184573	133184955	Gsg1l	0.0688181	0	0.0116553
chr1	CGI485	84834803	84837087	Fbxo36,Trip12	0.0139129	0.00148148	0.0117093
chr15	CGI7383	81131570	81131946		0.323191	0.00431034	0.0117718
chr12	CGI5115	111665919	111666573		0.024971	0	0.0117821
chr19	CGI10828	41450303	41450861	Pik3ap1	0.0383448	0	0.0118011
chr4	CGI15108	135845922	135847182	Zfp46	0.0210612	0.00231481	0.0119998
chr9	CGI21571	37187967	37188455	Hepacam	0.0466828	0.00277778	0.0120661
chr8	CGI21000	111089859	111090256		0.13344	0.011322	0.0121128
chr14	CGI6663	68333094	68335038	Cdca2,Kctd9	0.0100864	0.00094162	0.0121401
chr8	CGI20666	86525029	86525896	1700067K01Rik	0.0129941	0	0.01215
chr16	CGI8055	18623165	18623544	Sept5	0.0647411	0	0.0123528
chr12	CGI5071	109214767	109215192	Bcl11b	0.0494697	0	0.0123528
chr8	CGI20501	73311514	73312487	Mast3	0.040338	0	0.0124141
chr5	CGI16326	115086003	115086722	Trpv4	0.034678	0.00322581	0.0125548
chr11	CGI3309	77285913	77286522	Ankrd13b	0.0362093	0	0.012716
chr4	CGI14493	100114024	100114728	Ror1	0.0333251	0	0.012716
chr5	CGI15583	23288645	23289745	Pus7	0.0122462	0	0.0127253
chr9	CGI22324	108008334	108009250	Bsn	0.0259388	0.00145773	0.0127582
chr11	CGI3582	95011681	95012528	A730090H04Rik	0.0534204	0.00514601	0.0128464
chr9	CGI21898	62336476	62336935	Coro2b	0.108552	0	0.0128855
chr4	CGI15455	154360115	154360495	Plch2	0.067416	0	0.0129564
chr6	CGI17727	90713925	90714323	Iqsec1	0.135727	0	0.0130294
chr17	CGI9460	71011650	71012339	Dlgap1	0.0535937	0.003367	0.0130383
chr11	CGI4267	119166262	119166633		0.215637	0	0.0130579
chr16	CGI8119	23431095	23431761	Rtp1	0.0329946	0	0.0131178
chr1	CGI804	138001769	138002603	Cacna1s	0.041472	0.00173611	0.0133793
chr17	CGI8689	23878626	23880057	Kremen2	0.0133148	0	0.0134768
chr16	CGI8090	21214258	21215256	Ephb3	0.0262542	0.00947712	0.0134896
chr2	CGI11405	29082959	29083732	Ntng2	0.0346352	0.00540123	0.0136375
chr3	CGI13186	54985731	54986580	Sohlh2	0.019699	0.00181159	0.0136375
chr9	CGI22410	113616673	113617746	Pdcd6ip	0.0132408	0.0015625	0.0136542
chr18	CGI9968	38357356	38357857	Pcdh1	0.0412667	0.0111559	0.0137995
chr7	CGI19439	105232992	105233359	Myo7a	0.278571	0.0208333	0.0138414
chr5	CGI16461	120137797	120138245	LOC433944	0.0463957	0.00274725	0.0138747
chr14	CGI6715	71325339	71326045	Gfra2	0.0215894	0	0.0138888
chr17	CGI8616	13102514	13103073	Pnldc1	0.0201613	0	0.0138888
chr6	CGI17400	51372086	51372572		0.054198	0.00446429	0.01393
chr3	CGI13834	130980858	130981233		0.0699948	0.00568182	0.01393
chr7	CGI19928	148454784	148455416	Cdhr5	0.0592516	0.00240385	0.0140532
chr5	CGI15548	12928734	12929255		0.0771617	0.00526316	0.0140642
chr11	CGI2489	3440421	3440811		0.0483541	0	0.0140642
chr12	CGI4877	85989268	85989673	Vrtn	0.0464496	0	0.0140642
chr15	CGI7574	92582847	92583345	Pdzrn4	0.0730181	0.00526316	0.0140867
chr8	CGI21146	123018625	123019111	Gse1	0.0762671	0	0.0141132
chr17	CGI9492	74672009	74672408	Memo1	0.0708063	0	0.0141142
chr2	CGI11532	32767843	32768347	Fam129b	0.0769307	0	0.0141142
chr15	CGI7219	76029776	76030440	Plec	0.068571	0	0.0143257
chr4	CGI14924	129851055	129851506	Tinagl1	0.0656919	0.00842491	0.0143719
chr3	CGI13469	91828270	91828865	Pglyrp3	0.0301486	0	0.0144789
chr11	CGI4135	115330558	115331499	Slc16a5	0.033419	0.00621345	0.014507
chr15	CGI7435	82906269	82906778		0.0639698	0.0153862	0.0147068
chr5	CGI16723	135034273	135034861	Syna	0.0350876	0.00320513	0.0147574
chr2	CGI12733	166954718	166955070	Kcnb1	0.0588889	0	0.015064
chr16	CGI8174	31884798	31885219	Mfi2	0.0444453	0	0.0152937
chr8	CGI21027	112537441	112537817		0.0848073	0	0.0153271
chr15	CGI7783	101403994	101404414	Krt75,Krt85	0.0913409	0	0.0153283
chr9	CGI21548	34825084	34825624	Kirrel3	0.0949444	0.00952381	0.0153283
chr10	CGI1348	19890581	19890950	Mtap7	0.252943	0	0.0153374
chr7	CGI18273	4987300	4987824	Zfp784	0.0340827	0.00363636	0.0153374
chr7	CGI19902	147414597	147414970	Cd163l1	0.157064	0	0.0154013
chr7	CGI19190	71011484	71011854		0.0573413	0	0.0154757
chr2	CGI12547	156158749	156159141	4921517L17Rik	0.0785182	0.0168067	0.0154757
chr13	CGI5541	46714998	46715401	Cap2	0.374971	0	0.0158603
chr9	CGI21796	56467223	56469239	Lingo1	0.0194292	0.00411111	0.0158684
chr9	CGI22307	107592730	107593081	Sema3f	0.708311	0	0.0160234
chr8	CGI21008	111473081	111473653	Zfhx3	0.0509355	0.00648394	0.016062
chr11	CGI2620	20346216	20346670		0.07087	0.0140045	0.0160637
chr11	CGI3392	81386032	81386788	1700071K01Rik,Accn1	0.0567467	0.013838	0.0160736
chr15	CGI7836	102748801	102749152		0.1183	0	0.0161608
chr3	CGI13734	116168592	116168944		0.154145	0.00416667	0.0162458
chr15	CGI6986	27677309	27677976	Trio	0.0443361	0.00260417	0.0162494
chr11	CGI2708	32746747	32747120		0.0526519	0	0.0162628
chr16	CGI8387	85079971	85080641	App	0.0475376	0.00420168	0.0162628
chr4	CGI15347	149532440	149532901	Slc2a7	0.0496501	0	0.0163772
chr8	CGI21143	122923237	122923794		0.0423449	0.00888889	0.0163772
chr7	CGI18414	17659576	17660058	Psg16	0.0538221	0	0.0164918
chr9	CGI21863	59450556	59451570	Celf6	0.021519	0	0.0165437
chr16	CGI8396	87437251	87437713	Rwdd2b	0.0400128	0	0.0165692
chr16	CGI8186	32246294	32247682	Fbxo45,Wdr53	0.00987786	0.0015748	0.016764
chr8	CGI20294	46129209	46130071	Fat1	0.0192676	0	0.0167933
chr7	CGI18364	16822407	16822857	Gpr77	0.0442612	0.00606061	0.0172243
chr11	CGI3978	103672234	103673010	Wnt3	0.044827	0.00284091	0.0172243
chr10	CGI1836	79465268	79465855	Abca7	0.0423409	0.00285714	0.0172243
chr19	CGI10478	5756513	5758317	Ltbp3	0.0114545	0	0.0172431
chr7	CGI19839	140569336	140569752		0.0988456	0	0.017322
chr2	CGI12278	130866427	130867985	Gfra4	0.0160255	0	0.0173306
chr5	CGI15889	65217735	65218096	Klf3	0.0264503	0	0.0173532
chr7	CGI19208	72427636	72428115		0.0430274	0	0.0173998
chr12	CGI4964	99513772	99514295	Gpr65	0.0632636	0.0132275	0.0175682
chr13	CGI5264	9222586	9223103		0.0376257	0.00846774	0.01783
chr14	CGI6332	35336541	35336973		0.03566	0.00292398	0.0179997
chr16	CGI8371	76293005	76294085	Nrip1	0.0283054	0.0026455	0.0180694
chr7	CGI18773	30819386	30819750		0.0431694	0	0.0181669
chr11	CGI4009	105849848	105850434	Ace	0.0752386	0.0034965	0.0181966
chr10	CGI1678	67560095	67560703	Arid5b	0.0320669	0.00383772	0.0182005
chr5	CGI16138	104182206	104183771	Aff1	0.00936729	0	0.0182122
chr8	CGI20306	47004090	47004501	Pdlim3	0.0409255	0	0.0182616
chr19	CGI11107	57830640	57831032	Atrnl1	0.0918308	0.0047619	0.018309
chr9	CGI22399	110973827	110974304		0.0398919	0	0.0183246
chr10	CGI1720	74788764	74789163	Adora2a	0.0499652	0	0.0183675
chr11	CGI3606	95727778	95728389	B4galnt2	0.0327962	0	0.0183675
chr12	CGI5117	111723477	111723844	Ppp2r5c	0.312013	0.00694444	0.0184739
chr4	CGI14342	58969591	58970183	Zkscan16	0.0452953	0.00205761	0.0187497
chr3	CGI13505	95044597	95045098	Gm128	0.0338002	0	0.0188141
chr18	CGI10351	85885494	85885994		0.0738618	0.00534759	0.0190577
chrX	CGI23003	148781269	148781770	Gpr173	0.0869357	0	0.0191375
chr5	CGI16579	123615701	123616460	Setd1b	0.0392797	0.00842411	0.0191375
chr14	CGI6625	65690124	65690477	Extl3	0.187966	0.0108453	0.0191375
chr12	CGI5060	107362176	107362872		0.0308831	0.00549451	0.0191424
chr11	CGI2872	53403901	53404287	Kif3a	0.0906116	0.00854701	0.0192179
chr5	CGI15830	43623580	43626917	Cpeb2,Gm7854	0.0112377	0.0027852	0.0192187
chr11	CGI2654	23945888	23946347		0.0439909	0	0.0192187
chr11	CGI3626	96112679	96113551	Gm53	0.0140952	0	0.0192187
chr5	CGI16340	115309254	115309737	4930519G04Rik	0.0329884	0	0.0192196
chr7	CGI18833	31852323	31852921	Lgi4	0.0309674	0	0.0192537
chr6	CGI17991	125021303	125021757	Lpar5	0.219017	0.00591716	0.019358
chr17	CGI8604	9862007	9862706	Pabpc6	0.0251919	0.00375235	0.0194083
chr19	CGI10471	5715783	5716630	Ehbp1l1	0.0435982	0.00487805	0.019411
chr1	CGI1094	180847329	180848332	Kif26b	0.0459326	0.00243902	0.0194603
chr9	CGI22439	115059440	115060108	Osbpl10	0.29853	0.0488095	0.0195018
chr11	CGI3728	97784246	97784725	Plxdc1	0.0537818	0.015719	0.0195433
chr5	CGI16289	113794907	113795437		0.0519512	0.00750361	0.0195652
chr4	CGI14817	125998079	125999783	Adprhl2,Tekt2	0.00793252	0.000610501	0.0198003
chr14	CGI6547	58416683	58417978	Gm10094,Mir3077,Sap18	0.00958472	0	0.019822
chr9	CGI22181	98742590	98743308	Prr23a	0.0476464	0.011134	0.019863
chr19	CGI11026	47341532	47342097	Sh3pxd2a	0.060334	0.0249872	0.0199232
chr4	CGI15293	147523354	147523776	Fbxo6	0.0212656	0	0.0199834
chr2	CGI11411	29606551	29607539		0.0248185	0	0.0200113
chr11	CGI3308	77284452	77285688	Ankrd13b	0.0267964	0.00137363	0.0200113
chr5	CGI16511	121130789	121131561	Dtx1	0.0344381	0.003367	0.0200113
chr15	CGI7119	58704010	58705110	Trmt12	0.018063	0.00184672	0.0200113
chr18	CGI10335	84166168	84166628		0.0815728	0.0180776	0.0204749
chr2	CGI12779	168719347	168720138		0.0341023	0.0043573	0.0204976
chr3	CGI13890	142427820	142428726	Gtf2b	0.0127113	0	0.0204976
chr10	CGI2211	115550268	115551561	4933416C03Rik,Ptprr	0.0358171	0.00796484	0.0206911
chr4	CGI14618	115590547	115591055	Dmbx1	0.0287156	0	0.0207501
chr2	CGI12550	156307929	156308331	Epb4.1l1	0.0932778	0.00980392	0.0207738
chr6	CGI17895	117946884	117947667		0.0329483	0.00416667	0.0207738
chr12	CGI4924	88173024	88173562		0.0531289	0	0.0207738
chr18	CGI10099	61085022	61085381	Camk2a	0.158964	0.00866597	0.0210617
chr5	CGI16406	117583483	117583860	Taok3	0.199009	0.0187166	0.0211393
chr7	CGI19520	109261445	109262358	Chrna10	0.0176827	0.00212766	0.0212178
chr2	CGI11375	27354387	27355071		0.107293	0.0150376	0.0212178
chr2	CGI12926	181228121	181228660	Abhd16b	0.0309829	0	0.021295
chr4	CGI15149	137881325	137882749	Pink1	0.0117719	0	0.0216003
chr15	CGI7056	38821392	38822446		0.0177479	0.00303281	0.0216961
chrX	CGI22619	11713398	11714919	2900008C10Rik,Bcor	0.0172487	0	0.0217158
chr7	CGI19959	149556765	149557209	Ifitm10	0.0474766	0	0.0218682
chr3	CGI13863	136565747	136566224	Ppp3ca	0.0297619	0	0.0218877
chr14	CGI6536	57655005	57655917	Gja3	0.051489	0.014596	0.0218882
chr1	CGI439	75483118	75484981	Obsl1	0.0203397	0.00419946	0.0219077
chr7	CGI19199	71412863	71413886	Trpm1	0.0252063	0.00649895	0.0219649
chr18	CGI9850	36018611	36019215	Cxxc5	0.0713065	0.0104167	0.022192
chr8	CGI20289	44381064	44381474	Zfp42	0.0380201	0	0.0222112
chr17	CGI8939	31082556	31083163		0.0489999	0.00372257	0.0223434
chr18	CGI9950	37925857	37928189	Pcdha4-g,Pcdhga1,Pcdhga10,Pcdhga11,Pcdhga12,Pcdhga2,Pcdhga3,Pcdhga4,Pcdhga5,Pcdhga6,Pcdhga7,Pcdhga8,Pcdhga9,Pcdhgb1,Pcdhgb2,Pcdhgb4,Pcdhgb5,Pcdhgb6,Pcdhgb7,Pcdhgb8	0.0102897	0.00120521	0.0224378
chr1	CGI408	74996172	74999042	Ihh	0.015292	0.00684524	0.0228332
chr8	CGI20263	37209328	37210549	D8Ertd82e	0.0295066	0.0127578	0.0228705
chr1	CGI504	88284036	88284696	Nmur1	0.0204709	0	0.0228885
chr6	CGI17465	54710007	54710368		0.166272	0.0147059	0.0228885
chr5	CGI16416	117943274	117943931	Ksr2	0.0309746	0	0.0228885
chr11	CGI3790	99099699	99100164	Krt222	0.0853089	0	0.0229631
chr6	CGI18124	140244430	140245005		0.0438413	0.00287356	0.0231865
chr12	CGI4942	88748999	88749360		0.073005	0	0.0231865
chr17	CGI8594	8706240	8706677		0.060265	0.00980392	0.0232606
chr2	CGI11495	31951328	31951878	Ppapdc3	0.0578056	0.00416667	0.0233534
chr17	CGI9428	66692249	66693140	1110012J17Rik	0.0561149	0.0104072	0.0234087
chr3	CGI13836	131032792	131033445	Sgms2	0.0221625	0	0.0234236
chr18	CGI10323	82899112	82899724		0.0257158	0.0021645	0.0234236
chr18	CGI9984	39932980	39933709	Pabpc2	0.054134	0	0.0234236
chr7	CGI19496	108209677	108210318		0.0228472	0	0.0234236
chr1	CGI1210	192514320	192514904		0.02501	0	0.0234236
chr15	CGI7178	74629775	74630688	Ly6k	0.0372699	0.0126335	0.0234971
chr1	CGI113	34234697	34235288	Dst	0.0378326	0.00896281	0.0236067
chr5	CGI15678	30644871	30645230	Ccdc164	0.129634	0.00416667	0.0236067
chr6	CGI17780	99012615	99013133	Foxp1	0.0333248	0.00618073	0.0238835
chr8	CGI21212	124753437	124755430		0.0164407	0.00454244	0.0239726
chr7	CGI19043	52582554	52583182	Trpm4	0.0468174	0	0.0239726
chr13	CGI6089	112278726	112281192	Gpbp1	0.0127617	0.00478175	0.0240268
chr4	CGI14131	35655526	35656073	Lingo2	0.057734	0.00583293	0.0240993
chr15	CGI7746	100499496	100500172	Bin2	0.0230984	0	0.0245586
chrX	CGI22769	70667157	70667980	Zfp92	0.0468998	0.00644841	0.0247226
chr7	CGI18435	19663084	19663575	Dmwd	0.193024	0.0380423	0.0249232
chr5	CGI16988	144143214	144143729	Grid2ip	0.0295737	0	0.0250682
chr8	CGI21248	125877774	125878349	Spire2	0.101793	0.0025	0.0251396
chr3	CGI13953	152353142	152353495		0.0560668	0	0.0251925
chr11	CGI3332	77982687	77983085	Nek8	0.0452522	0	0.025282
chr6	CGI17830	113126377	113126740	Lhfpl4	0.0416231	0	0.0253142
chr4	CGI15135	137245399	137245771	Rap1gap	0.0364673	0	0.0253142
chr13	CGI5659	55261117	55261832	Fgfr4	0.0490269	0.00753968	0.0254765
chr4	CGI14947	131475526	131478954	Tmem200b	0.0107776	0.00248591	0.0256752
chr11	CGI2696	32113047	32113625	Rhbdf1	0.0663921	0.0155129	0.0257639
chr7	CGI19047	52601931	52602535	Ppfia3	0.0538606	0.00774866	0.0259227
chr19	CGI11044	48021538	48021974	Ccdc147	0.0667626	0	0.0259227
chr19	CGI11104	57513433	57513965		0.0971641	0.0133053	0.0261088
chr8	CGI21189	123978664	123979121		0.0368477	0	0.0261088
chr4	CGI15373	151040681	151041054	Camta1	0.380505	0.00625	0.0261088
chr10	CGI1568	58742915	58743589		0.0378568	0.00454545	0.0261088
chr2	CGI12671	164617128	164617561	Snx21	0.0451185	0.004	0.0261212
chr10	CGI1868	79774481	79776198	Apc2	0.0273731	0.0069171	0.0261212
chr19	CGI10431	5081626	5083102	Tmem151a	0.0160227	0.00228311	0.0263356
chr18	CGI10185	68349347	68349747	D18Ertd653e	0.48201	0	0.0264231
chr9	CGI22442	115218272	115220346	Stt3b	0.00932217	0.000878702	0.0264561
chr2	CGI11699	65346406	65346759	Scn3a	0.0360275	0.00396825	0.0264859
chr6	CGI17468	54893646	54894902	Nod1	0.0125596	0.00137741	0.0264859
chr5	CGI15609	24060166	24060625	4931409K22Rik	0.05298	0.00395257	0.0265188
chr19	CGI10955	45323024	45323561		0.0473029	0.00227273	0.0265878
chr9	CGI22185	98854810	98857984	Foxl2,Foxl2os	0.00775989	0.00378426	0.0267646
chr7	CGI18488	20011351	20011713	Mark4	0.0451398	0.00541394	0.0267972
chr9	CGI21375	15678515	15679373	Mtnr1b	0.0221257	0	0.0268478
chr10	CGI1826	79420897	79421395		0.0721732	0	0.0271919
chr7	CGI18634	28090322	28090688	Ltbp4	0.0586003	0	0.0271919
chr4	CGI15432	153483643	153484044	Trp73	0.0565517	0	0.0271919
chr7	CGI18385	17308938	17309298	Ceacam9	0.0561628	0.0105263	0.0271919
chr14	CGI6679	70467378	70467818		0.0527194	0	0.0271919
chr10	CGI2127	93889656	93890010		0.057476	0	0.0271919
chr9	CGI21995	69755198	69755625		0.0606743	0	0.0271919
chr17	CGI9601	86091141	86092613		0.0201263	0.00159439	0.0271919
chr9	CGI22187	98864022	98864391		0.0568666	0	0.0271919
chr17	CGI9617	87524575	87525138	Socs5	0.0425702	0.0119334	0.0272381
chr2	CGI11880	87366058	87366480		0.0215608	0	0.0272381
chr13	CGI5678	55637074	55638388	Ddx41	0.00993973	0	0.0272521
chr7	CGI18905	39006375	39007001	Plekhf1	0.0381944	0	0.0274581
chr4	CGI15465	154718604	154720120	Prkcz	0.0355914	0.00709456	0.0274581
chr10	CGI1978	80862805	80863547	Nfic	0.0348876	0	0.027472
chr3	CGI13026	28476229	28476585	Tnik	0.135996	0.00350877	0.0276594
chr4	CGI15218	140846990	140848293		0.0146953	0	0.0276594
chr9	CGI21892	62120693	62121222	Spesp1	0.0348059	0.00333333	0.0276908
chr5	CGI16383	116052308	116052923	Gcn1l1	0.0376433	0.00265252	0.0280587
chr15	CGI7508	87954263	87954648		0.0529487	0.00700758	0.0281783
chr19	CGI11110	58696803	58697377	1810007D17Rik	0.0418651	0.0121337	0.0282533
chr5	CGI16583	123823153	123823715	Bcl7a	0.0521638	0.00378788	0.0282533
chr8	CGI21006	111317866	111318933	Zfhx3	0.0367949	0.00530933	0.0282533
chr11	CGI2461	3076519	3078287	Sfi1	0.210454	0.0663245	0.0283017
chr13	CGI5733	59161404	59161860	Ntrk2	0.0443858	0.0037594	0.0284206
chr9	CGI21453	21598922	21600146	Kank2	0.0291855	0.0105059	0.0284244
chr16	CGI8485	93690650	93691024	Cbr3	0.0437202	0.0075188	0.0284244
chr17	CGI8910	29374065	29376231	Cpne5	0.00935344	0	0.0284244
chr5	CGI16466	120250413	120250973		0.0554094	0.0105263	0.0285733
chr11	CGI3366	79152599	79153891	Nf1	0.00987983	0	0.0285733
chr8	CGI20998	111007787	111008268		0.0519717	0	0.0287344
chr5	CGI16253	112645964	112646320	Miat	0.0531159	0	0.0287344
chr10	CGI2374	127150980	127151549	Myo1a	0.0305039	0.0025641	0.0287344
chr11	CGI3529	89253142	89253573	4932411E22Rik	0.030379	0	0.0287405
chr1	CGI219	43787419	43787854	1500015O10Rik	0.035654	0	0.0287405
chr7	CGI19058	52693265	52693733	Gys1	0.0494505	0	0.0287405
chr11	CGI2714	33096752	33097237		0.0575108	0	0.0287405
chr17	CGI8626	14415874	14417978	Smoc2	0.0125578	0.0023929	0.0287405
chr5	CGI16897	140086763	140087207		0.0510161	0	0.0287405
chr19	CGI10623	10933356	10933779	Tmem132a	0.0535847	0.00757576	0.0295667
chr5	CGI15868	53916887	53917360		0.0731683	0.00936979	0.0295667
chr4	CGI15175	139224842	139225646	Tas1r2	0.0150487	0	0.0296309
chr9	CGI22075	79189856	79190828		0.021485	0.00377358	0.0298458
chr15	CGI7461	84280945	84281416		0.0809935	0.00657895	0.0298458
chr1	CGI728	134277136	134277715	Tmcc2	0.0419198	0.0047619	0.0301179
chr17	CGI9574	85251812	85252385		0.0248709	0.00271739	0.0301814
chr15	CGI7263	76741108	76742638	Zfp647	0.0191561	0.00492112	0.0302275
chr4	CGI14444	91037498	91039397	Elavl2	0.0136184	0.00384025	0.0302736
chr19	CGI11100	57399245	57399823	B230217O12Rik	0.0235141	0	0.0304
chr2	CGI12025	106023765	106024210		0.0363917	0	0.0304286
chr9	CGI21381	16352879	16353283		0.0299977	0	0.0304916
chr6	CGI18129	140650766	140651117		0.0537586	0	0.0305027
chr1	CGI1018	173188876	173189281	Adamts4	0.0629527	0.00326797	0.0305484
chr11	CGI3459	85647996	85648431	Tbx2	0.106494	0.00555556	0.0306284
chr5	CGI15880	64040239	64041816	3110047P20Rik	0.00611058	0	0.0306394
chr4	CGI14976	132439564	132441006	Stx12	0.00957261	0.000554017	0.0306848
chr10	CGI1656	63047728	63048240	Ctnna3	0.0686181	0.0163043	0.030902
chr9	CGI22529	121891127	121893018	Gtdc2	0.0235395	0.00838046	0.0310502
chr19	CGI10387	4156079	4156534	Ptprcap	0.0956358	0.00588235	0.031507
chr5	CGI15709	31553589	31554843	Krtcap3,Nrbp1	0.0124577	0	0.031586
chr2	CGI11629	44843995	44844700	Zeb2	0.0312336	0.0131579	0.0316819
chr1	CGI264	55419055	55420932	Boll	0.0189037	0.00578853	0.0317193
chr17	CGI8839	27461921	27462879		0.0276668	0.000909091	0.0317193
chr8	CGI20392	67507420	67507788	Trim75	0.0964911	0.0125	0.0318591
chr1	CGI460	78534046	78534589	Mogat1	0.0419597	0	0.0319715
chr10	CGI1585	59648401	59649721	Chst3	0.0209237	0.00582602	0.0319815
chr4	CGI14910	129576070	129576429		0.0479636	0	0.0320425
chr4	CGI14940	131374581	131375146	Ptpru	0.0260856	0.00274725	0.0322908
chr17	CGI9431	66728629	66729574	1110012J17Rik	0.0688854	0.027053	0.0323004
chr17	CGI8650	21081842	21083290	Ppp2r1a	0.0148374	0.00174825	0.03231
chr6	CGI17876	115742853	115743315	Cand2	0.126437	0.00694444	0.0323366
chr8	CGI21213	124792747	124793820		0.0115332	0	0.0323462
chr10	CGI2150	97155566	97156957	4921510H08Rik,Gm10754	0.0391672	0.0159619	0.0325425
chr11	CGI4099	114594125	114594594	Dnaic2	0.0410911	0.0030303	0.0325858
chr5	CGI17106	151239157	151239943	Fry	0.0481456	0.00367647	0.0326629
chr3	CGI13069	34533447	34533915	Sox2ot	0.0844933	0.0226891	0.0327907
chr7	CGI18538	25216983	25218500	Irgc1	0.0167793	0.00277005	0.0328
chr5	CGI16354	115622604	115623079	Cabp1	0.0321597	0	0.0328261
chr19	CGI11096	57193779	57194235	Ablim1	0.378558	0.0319264	0.0328352
chr15	CGI6923	6859035	6859408		0.0519571	0	0.032895
chr7	CGI19207	72424102	72424530		0.157824	0.0168651	0.0330391
chr2	CGI12878	179272053	179272497	Cdh4	0.116961	0.0111111	0.0332334
chr13	CGI5535	46012572	46013046	Atxn1	0.0282135	0	0.0333096
chr6	CGI17824	112555919	112556424		0.0652817	0	0.0333527
chr15	CGI7418	82129196	82129889	Wbp2nl	0.0376899	0.00724638	0.0333527
chr10	CGI1804	79191541	79191904	Hcn2	0.0526942	0	0.0333527
chr7	CGI18346	16549185	16549741	Ehd2	0.0389366	0.00274725	0.0337225
chr10	CGI2220	116441169	116441696	Best3	0.0363376	0.00752137	0.0337225
chr18	CGI10101	61143860	61144690	Camk2a	0.0334485	0.00201613	0.0337309
chr3	CGI13338	87587486	87587992	Ntrk1	0.0398854	0.0156566	0.0337896
chr3	CGI13311	84248532	84249300	Fhdc1	0.0369841	0.00603992	0.0339821
chr12	CGI4604	55168409	55170278	Npas3	0.0106742	0.00411011	0.0343909
chr9	CGI22334	108241325	108242606	Gpx1	0.00771813	0	0.0343909
chr10	CGI2406	127961662	127963422	Esyt1	0.0169567	0.000578704	0.0343909
chr4	CGI14941	131375211	131375729	Ptpru	0.0461514	0.00277778	0.0344322
chr15	CGI7585	93440608	93441068		0.0227328	0	0.0345813
chr6	CGI17867	114918342	114920299		0.0107687	0.00249501	0.0345813
chr17	CGI9507	78945029	78945446	Vit	0.0507863	0	0.0346122
chr8	CGI20830	96239263	96239721		0.0281987	0	0.0346122
chr2	CGI12610	160556261	160558279	Plcg1	0.0138679	0.0017094	0.0346122
chr10	CGI2069	86193415	86193970	BC030307	0.0471828	0	0.0346122
chr3	CGI13384	88339941	88341137	Mex3a,Mir1905	0.0101531	0.00337838	0.0346531
chr15	CGI7195	75715699	75717008		0.0298949	0.00575758	0.0346684
chr2	CGI11853	82783568	82783920		0.078779	0	0.0346684
chr12	CGI5152	112907635	112908137	Ckb	0.0835704	0.0142857	0.0346761
chr7	CGI18502	20171203	20172469	Clasrp	0.0168953	0.00148148	0.0347831
chr8	CGI20170	24744239	24744618		0.0536179	0.00446429	0.0348071
chr10	CGI1929	80415411	80415856	Gng7	0.0437448	0	0.0349948
chr9	CGI22021	72759732	72760251	Prtg	0.0298387	0.00799233	0.0349948
chr10	CGI2081	87841571	87842783	Gnptab	0.0149809	0.00231481	0.0349948
chr2	CGI11317	25280686	25281476	Fut7	0.0357638	0	0.0352331
chr10	CGI1931	80460601	80461123	Gng7	0.0306806	0	0.0352402
chr19	CGI10647	15436739	15437245		0.0413978	0	0.0354945
chr7	CGI18836	31910035	31910544	Scn1b	0.0735857	0.00653595	0.0355344
chr16	CGI8335	57280464	57280957	Tmem30c	0.0445352	0	0.0356675
chr1	CGI599	95290826	95291352	Ano7	0.0337296	0	0.0356675
chr14	CGI6705	71026776	71027271	Epb4.9	0.0639122	0	0.0356675
chr7	CGI19901	147410173	147410749	Cd163l1	0.0334716	0	0.0356675
chr4	CGI15243	141302685	141303175	Agmat	0.0389895	0	0.0356675
chr13	CGI5255	6621031	6621505	Pfkp	0.045366	0.00714286	0.0357562
chr17	CGI9364	56649713	56652189	Znrf4	0.013791	0.00495749	0.035763
chr6	CGI17722	90487938	90488324		0.124773	0.0119048	0.0358649
chr10	CGI2082	87921985	87922933	Sycp3	0.0307223	0.0094246	0.0358649
chr13	CGI5434	34838297	34839551	Fam50b	0.026447	0.0077491	0.0358649
chr1	CGI141	36465229	36465869		0.0231212	0.00357143	0.0361165
chr11	CGI2735	35821502	35822205	Tenm2	0.0210818	0.0031746	0.0362535
chr15	CGI7684	98764071	98765472	Tuba1b	0.0136301	0.00247107	0.0362762
chr4	CGI15315	148314727	148315088	Casz1	0.0520078	0	0.0363016
chr7	CGI18838	31927606	31927962	Gramd1a	0.0347009	0	0.0363016
chr10	CGI1722	74906892	74907305		0.0760783	0.00544508	0.0363016
chr6	CGI18150	143781727	143782345	Sox5	0.0373366	0.0149602	0.0363016
chr2	CGI12787	168834240	168834686		0.0566376	0.0238636	0.0363241
chr18	CGI9665	3863990	3864455		0.0333556	0	0.036343
chr1	CGI305	60819831	60820233	Cd28	0.0324004	0.00284091	0.036343
chr15	CGI7831	102567736	102568209		0.0264154	0	0.036343
chr11	CGI2820	50609505	50610145	Adamts2	0.046424	0	0.0363493
chr17	CGI9069	35113777	35115723	Hspa1l	0.0175274	0.00174835	0.0364041
chr4	CGI14839	126872148	126872553	Dlgap3	0.0978327	0	0.036475
chr5	CGI16303	114287010	114287393		0.349078	0.00925926	0.0365296
chr11	CGI3798	99279131	99279697	Krt12	0.0210148	0	0.0365358
chr5	CGI16720	134998512	134999005	Clip2	0.0401415	0.003367	0.0366549
chr1	CGI324	64354977	64355608		0.0776777	0.00699301	0.0366609
chr6	CGI17384	49268944	49269886	Ccdc126	0.0166847	0	0.0368017
chr15	CGI7636	97699960	97700320	Vdr	0.0582301	0.0142857	0.0368017
chr2	CGI11226	17760774	17761204		0.04303	0.00520833	0.0368237
chr13	CGI5671	55545765	55547562	Grk6	0.0131963	0.00170068	0.0370226
chr8	CGI21005	111316005	111316945	Zfhx3	0.0402933	0.00519481	0.0372373
chr19	CGI10661	17237980	17238415	Prune2	0.0513195	0.00452489	0.0374195
chr19	CGI11099	57398079	57398647	B230217O12Rik	0.0310606	0	0.037457
chr17	CGI9212	46210642	46211250		0.0392457	0	0.0375106
chr11	CGI3709	97397427	97399123	Srcin1	0.0277674	0.00498641	0.0375533
chr4	CGI14478	99010532	99011007		0.0379752	0.003125	0.0375533
chr19	CGI10427	5051005	5051420	Rin1	0.0796917	0	0.0375907
chr10	CGI1918	80352799	80353275	Tmprss9	0.0447839	0	0.0383843
chr12	CGI5139	112614813	112616898	Cdc42bpb	0.0148117	0.00309781	0.038389
chr17	CGI9652	91486967	91488639	Nrxn1	0.0121545	0.00580596	0.0384557
chr7	CGI19813	138441599	138442103		0.0402129	0	0.0384557
chr12	CGI4954	92776053	92776573	Bc1,Tshr	0.0272788	0	0.0384557
chr5	CGI16081	97820783	97821590	4930467D21Rik,Naa11	0.0496648	0.00510995	0.0384557
chr12	CGI4948	90033727	90034284	Nrxn3	0.0252394	0	0.0384763
chr7	CGI18885	37555299	37556489	Tshz3	0.0265562	0.00276134	0.0389738
chr3	CGI13273	78870341	78870906	Rapgef2	0.0450755	0.0129252	0.0396137
chr2	CGI12496	154206635	154207002	Snta1	0.0316786	0	0.0398081
chr8	CGI21262	126415573	126417155	Acta1	0.0271349	0.00438763	0.0398277
chr10	CGI1969	80794903	80796118	Tbxa2r	0.0240774	0.00340695	0.0398472
chr4	CGI14393	79648303	79648992		0.0699685	0	0.0402153
chr6	CGI17907	119124840	119125959	Cacna1c,Dcp1b	0.00861257	0	0.0403929
chr10	CGI1592	60029089	60029704	Cdh23	0.0730506	0	0.0403962
chr8	CGI20716	87311542	87311897	Nfix	0.376532	0.025	0.0408897
chr7	CGI18857	35604715	35605296		0.076644	0.00526316	0.04094
chr13	CGI5768	63673488	63675285		0.0117883	0	0.0411481
chr8	CGI20934	107994953	107995620	Tppp3	0.0322834	0	0.0412456
chr11	CGI2795	49403452	49404066		0.0463506	0.00246914	0.0413113
chr7	CGI18286	6140760	6141731	Zfp444	0.0243831	0.00714182	0.0415345
chr3	CGI13145	51440595	51440986		0.0193317	0	0.0415685
chr10	CGI1889	79976535	79977045	Onecut3	0.0798598	0.0113636	0.0416338
chr2	CGI12630	163164641	163165931	Jph2	0.0163975	0.00409098	0.041762
chr18	CGI9911	37596661	37597753	Pcdha4-g,Pcdhb12	0.017406	0.00435479	0.0417958
chr14	CGI6616	64437721	64438690	Xkr6	0.028816	0.00466564	0.0418922
chr4	CGI14747	122866060	122866663	Hpcal4	0.0165529	0	0.0419637
chr5	CGI16530	122142415	122142823		0.0511559	0.0037594	0.0419637
chr17	CGI9181	45300380	45301037		0.0253645	0	0.0419637
chr15	CGI7256	76647275	76649047	Arhgap39	0.0129374	0.0053738	0.0419637
chr5	CGI15681	30924101	30925488	Kcnk3	0.0129322	0.00102041	0.0420284
chr2	CGI12795	169737778	169738458		0.0551999	0.00383142	0.0420931
chr4	CGI14798	124804332	124805535	Zc3h12a	0.0117316	0.000877193	0.0423764
chr13	CGI5442	35832204	35834442	Cdyl	0.0114301	0.00299423	0.0425032
chr5	CGI16666	129287485	129288353	Rimbp2	0.0224282	0.00387597	0.0426142
chr3	CGI13744	117024791	117025683	D3Bwg0562e	0.0178329	0.00324675	0.0428996
chr10	CGI2036	83169943	83170377		0.0656183	0.00775376	0.0432434
chr5	CGI16249	112386604	112387479		0.0151135	0.00231481	0.0432602
chr1	CGI1219	193006138	193009733	Atf3	0.00619928	0.00347222	0.0433248
chr5	CGI16153	105924150	105924511		0.139921	0	0.0436364
chr12	CGI4949	90498461	90499155	Nrxn3	0.0337644	0.0117127	0.0438699
chr15	CGI7176	74551026	74552553	4930572J05Rik	0.0065598	0	0.0441032
chr12	CGI4759	74923304	74923712		0.0580753	0	0.0442278
chr11	CGI2493	3614438	3614828	Osbp2	0.0529693	0.00480769	0.0443057
chr11	CGI3248	74650865	74652438	Mnt	0.00793452	0	0.0443217
chr16	CGI8530	97042195	97042720	Dscam	0.0298831	0	0.0444149
chr12	CGI4455	18397576	18398028		0.225053	0.0357143	0.0446934
chr18	CGI9913	37608875	37609597	Pcdha4-g,Pcdhb14	0.0292539	0.00183824	0.0452029
chr17	CGI9077	35197279	35198151	Ddah2	0.0215063	0.00520833	0.0452182
chr19	CGI10516	6412976	6413418	Rasgrp2	0.0243604	0	0.0452798
chr4	CGI14864	128550188	128550625		0.039283	0.00555556	0.0453258
chr15	CGI7772	101060871	101061292	Grasp	0.0469636	0.00367647	0.0453408
chr7	CGI19916	148274210	148274984	Pkp3	0.0251631	0.00252525	0.0453408
chr15	CGI7182	74916596	74917574		0.273263	0.0896897	0.0453868
chr1	CGI441	75500028	75500693	Obsl1	0.022866	0	0.0456784
chr16	CGI8109	22432041	22432409	Etv5	0.164987	0.0208333	0.0458161
chr17	CGI8608	10582210	10582827		0.0633153	0	0.0459229
chr4	CGI15505	155607685	155609452	Klhl17	0.0148793	0.00387597	0.0459377
chr11	CGI4089	114284605	114285271	4932435O22Rik	0.0351307	0.00246305	0.046075
chr7	CGI19882	147060800	147061540	Gpr123	0.0158228	0	0.0461348
chr4	CGI15254	142443853	142444209		0.0366902	0.0031746	0.0461348
chr2	CGI11267	22443972	22445386	Myo3a	0.0402251	0.00115543	0.0463022
chr1	CGI1032	173943030	173943400	Vangl2	0.0489358	0.00190476	0.0463319
chr10	CGI1543	53316099	53317904	Asf1a,Mcm9	0.0115069	0.00333026	0.0463616
chr7	CGI18280	5031438	5032716	Epn1,U2af2	0.0160187	0.00319285	0.0464217
chr2	CGI12313	132764894	132765257	Fermt1	0.0896113	0.0129555	0.0465885
chr13	CGI6051	103526813	103527169	Mast4	0.0655768	0.0037594	0.0466941
chr6	CGI17735	91358574	91358929	Wnt7a	0.12509	0.0042735	0.0468452
chr5	CGI16669	129525163	129527068	Ran	0.0146695	0.00499243	0.0469949
chr2	CGI11550	33821881	33822581		0.0175829	0	0.0469949
chr7	CGI18528	24992492	24992883	Zfp111	0.038464	0	0.0471455
chr7	CGI18498	20130784	20131295	Ppp1r37	0.0348825	0.00454545	0.0473111
chr7	CGI19657	128682931	128683343		0.0719184	0.00287356	0.0473792
chr9	CGI22486	119872029	119872535	Ttc21a	0.0381846	0.00263158	0.0473792
chr5	CGI16273	113069692	113070635		0.0157035	0	0.0473792
chr2	CGI12585	157766496	157767362	Vstm2l	0.0275417	0.00289575	0.0473792
chr11	CGI3235	73093074	73093500	Trpv3	0.0531038	0	0.0473792
chr18	CGI9678	6489747	6491420	Epc1,Mir1893	0.00635981	0.000816993	0.047544
chr2	CGI11701	65857448	65857871	Csrnp3	0.112279	0.00840336	0.0477086
chr6	CGI17676	87531137	87531986	Prokr1	0.0162608	0	0.0477503
chr2	CGI12691	164941562	164942105	Cdh22	0.0384266	0	0.0477503
chr9	CGI22552	123370976	123371404	Lars2	0.226095	0.0829933	0.0477938
chr9	CGI22150	95305286	95308446	Chst2	0.0126329	0.00414801	0.0478975
chr12	CGI4683	68160091	68160675	Mdga2	0.0999428	0.00586957	0.0479689
chr7	CGI19546	112958831	112960068	Mrpl17	0.0102103	0.00126263	0.0479689
chr18	CGI9734	15220261	15223779	Kctd1	0.00699231	0.00178091	0.0480572
chr4	CGI15089	135553248	135553652		0.0362598	0.00357143	0.0482807
chr2	CGI11818	75272644	75273331		0.037934	0	0.0488018
chr5	CGI16020	82223407	82224117	Lphn3	0.0120071	0	0.0488018
chr14	CGI6392	49071549	49071941	6720456H20Rik	0.0223752	0.00263158	0.0490694
chr8	CGI20238	34841908	34843313	Gtf2e2	0.00812085	0.0020202	0.0498612

## Sheet: E16.5fgPMR
List of fgPMRs at E16.5
Chromosome	ID	Start	End	Symbol	CGI methylation level		U-test
					16.5mPGC	16.5fPGC	P-value
chr18	CGI9727	13131236	13133240	Impact	0.0139641	0.0808138	3.19954e-11
chr6	CGI17279	33220596	33221206	Exoc4	0.325095	0.743505	4.91198e-08
chr4	CGI15275	146315748	146316885		0.0359982	0.155135	9.0128e-08
chr19	CGI10807	38598756	38599700	Plce1	0.0418268	0.25145	1.64246e-07
chr17	CGI9159	39979832	39985876	Rn45s	0.161706	0.19764	9.48716e-07
chr7	CGI18301	6681989	6683417	Peg3	0.0200824	0.110786	2.51513e-06
chr12	CGI4980	100883024	100883754		0.205285	0.447075	8.94749e-06
chrX	CGI22676	35474163	35475178	Rhox13	0.0388975	0.16737	1.53907e-05
chr7	CGI19176	67149094	67150214	Snrpn,Snurf	0.0409479	0.152783	5.30592e-05
chrX	CGI22836	92018994	92019673		0.0161186	0.137853	6.00571e-05
chr15	CGI7612	96884723	96885730	Slc38a4	0.0140231	0.114782	9.4489e-05
chr6	CGI17126	4696691	4698891	Peg10,Sgce	0.0462452	0.12749	0.000102942
chrX	CGI22722	51059809	51060397	1700013H16Rik	0.0133333	0.153789	0.000358236
chr15	CGI7756	100726889	100727359	Scn8a	0.0928776	0.275044	0.000904294
chrX	CGI22560	5659115	5659919	AU022751	0.024031	0.0750401	0.00118831
chr10	CGI1556	57687046	57687544		0.0333592	0.11579	0.00177784
chr6	CGI17261	30687664	30688606	Mest	0.0295064	0.101897	0.00225916
chr6	CGI18055	128595583	128595966		0	0.10841	0.00278752
chrX	CGI22709	47726883	47727302		0.044983	0.156212	0.00343626
chr16	CGI8276	43609284	43610395	Zbtb20	0.0247708	0.0780587	0.00577706
chr12	CGI4467	20238560	20240297		0.341203	0.462954	0.00671135
chrX	CGI22809	73211530	73212278		0.0103043	0.0455561	0.0126823
chr2	CGI12405	150295710	150296129		0.0130337	0.0610835	0.0131691
chr5	CGI16976	144014483	144017498	Zfp316	0.00524902	0.0165006	0.0143719
chr12	CGI4663	60112329	60113401	Sec23a	0.00188679	0.0250093	0.0153283
chr7	CGI19850	142927312	142927834		0.0659977	0.191145	0.0193744
chr4	CGI15263	144177929	144178560		0.0139335	0.0817395	0.0230377
chr7	CGI19976	150480921	150482670	Kcnq1,Kcnq1ot1	0.00562854	0.0254074	0.0239009
chr12	CGI5212	117231609	117232007		0.0250239	0.107723	0.0260111
chrX	CGI22813	76102103	76102463		0.29735	0.498051	0.0304
chrX	CGI23074	166434713	166436290		0.553386	0.597391	0.031832
chr14	CGI6422	52054278	52055400		0.0563796	0.118447	0.0378998
chr11	CGI2568	6606477	6606925		0.0337335	0.0940212	0.0426783
chr9	CGI22426	114488926	114489435		0	0.0369565	0.0428669
chr4	CGI15276	146561517	146562050	Gm13152	0.0798296	0.186194	0.0432614
